# Supplementary material for: Life satisfaction and parental support among secondary school students in Urumqi: the mediation of physical activity
Source: PeerJ. 2022 Nov 10;10:e14122. doi: 10.7717/peerj.14122 (PMC9657177; doi:10.7717/peerj.14122)
Supplement: Supplemental Information 1 [file peerj-10-14122-s001.xlsx]

## Sheet: Sheet1
id	survey date	grade	sex	age	sleep	Mo_edu	Fa_edu	PA1	a2	a3	a4	a5	a6	a7	a8	PA2	a9a	a9b	a9c	a9d	a9e	a9f	a9g	PA3	PAQ	ac1a	ac1b	ac1c	ac1d	ac1e	ac1f	ac1g	ac1h	ac1i	SS_mo restrict	SS_mo support	SS_Mo	ac2a	ac2b	ac2c	ac2d	ac2e	ac2f	ac2g	ac2h	ac2i	SS_fa restrict	SS_fa support	SS_Fa
1	2021-12-03	Senior Two	male	17	6-8h/d	Specialties	Undergraduate	1.5	4	1	1	2	2	3	2	2.14286	2	2	2	2	2	2	2	2	1.88095	3	3	3	3	3	3	2	2	2	6	18	24	3	3	3	3	3	3	2	2	2	6	18	24
2	2021-12-03	Senior Two	female	16	＜6h/d	High school and blow	High school and blow	1.40909	5	1	2	1	2	2	2	2.14286	1	1	1	1	2	2	2	1.42857	1.66017	2	2	3	2	2	2	3	2	3	8	13	21	2	2	2	2	2	2	3	3	3	9	12	21
3	2021-12-03	Senior Two	female	17	6-8h/d	High school and blow	High school and blow	1.04545	4	1	1	1	4	2	1	2	1	1	1	1	1	1	1	1	1.34848	3	2	2	3	2	2	2	3	3	8	14	22	2	2	2	2	2	2	2	2	3	7	12	19
4	2021-12-03	Senior Two	female	16	6-8h/d	Undergraduate	Undergraduate	1.54545	5	1	1	1	1	5	5	2.71429	3	1	1	1	3	2	1	1.71429	1.99134	3	1	2	2	2	2	3	4	4	11	12	23	3	1	2	2	2	2	3	4	4	11	12	23
5	2021-12-03	Senior Two	male	17	6-8h/d	High school and blow	High school and blow	1.63636	5	1	1	3	2	3	3	2.57143	2	2	2	2	2	4	4	2.57143	2.25974	3	4	4	2	4	4	4	4	4	12	21	33	4	4	4	1	4	4	4	4	4	12	21	33
6	2021-12-03	Senior Two	male	16	6-8h/d	High school and blow	High school and blow	1.09091	3	1	2	1	1	1	1	1.42857	1	2	2	2	2	2	2	1.85714	1.45887	2	2	2	2	2	2	3	3	3	9	12	21	2	2	2	2	2	2	2	3	3	8	12	20
7	2021-12-03	Senior Two	female	16	6-8h/d	Undergraduate	Undergraduate	1.36364	5	3	1	1	1	1	4	2.28571	1	2	1	1	3	2	2	1.71429	1.78788	3	3	2	3	3	3	3	3	3	9	17	26	3	3	2	3	3	2	3	3	3	9	16	25
8	2021-12-03	Senior Two	male	16	6-8h/d	Undergraduate	High school and blow	1.31818	3	1	1	1	1	1	1	1.28571	2	3	1	1	3	1	1	1.71429	1.43939	2	2	2	2	2	2	4	4	4	12	12	24	1	1	1	1	1	1	4	4	4	12	6	18
9	2021-12-03	Senior Two	female	15	＜6h/d	High school and blow	High school and blow	1.5	4	1	2	1	1	4	2	2.14286	3	3	3	3	3	2	2	2.71429	2.11905	3	3	3	3	3	3	3	3	3	9	18	27	2	2	2	3	2	2	3	3	3	9	13	22
10	2021-12-03	Senior Two	male	17	6-8h/d	High school and blow	High school and blow	1.31818	4	1	1	1	1	4	1	1.85714	2	2	2	2	2	2	2	2	1.72511	3	1	1	1	1	1	4	4	4	12	8	20	1	1	1	1	1	1	4	4	4	12	6	18
11	2021-12-03	Senior Two	female	16	6-8h/d	Undergraduate	Undergraduate	1.45455	3	2	2	1	2	3	1	2	1	2	1	1	2	1	2	1.42857	1.62771	3	2	3	3	3	3	3	3	3	9	17	26	3	2	3	3	3	3	3	3	3	9	17	26
12	2021-12-03	Senior Two	female	17	6-8h/d	High school and blow	High school and blow	1.13636	4	1	3	1	2	2	2	2.14286	2	2	2	1	1	1	1	1.42857	1.56926	3	3	3	2	2	2	3	3	3	9	15	24	3	3	3	2	2	2	3	3	3	9	15	24
13	2021-12-03	Senior Two	male	16	6-8h/d	Undergraduate	Undergraduate	1.18182	4	2	2	1	1	3	2	2.14286	1	1	1	1	1	3	1	1.28571	1.5368	1	1	1	1	1	1	4	4	4	12	6	18	1	1	1	1	1	1	4	4	4	12	6	18
14	2021-12-03	Senior Two	male	16	6-8h/d	Undergraduate	High school and blow	1.59091	4	2	2	3	3	4	3	3	4	1	2	1	4	4	2	2.57143	2.38745	2	2	3	1	3	2	2	3	4	9	13	22	2	3	3	2	2	2	2	4	2	8	14	22
15	2021-12-03	Senior Two	female	15	＜6h/d	High school and blow	High school and blow	1.36364	5	1	2	1	1	5	1	2.28571	1	4	1	1	4	1	1	1.85714	1.8355	1	1	1	1	1	1	4	4	4	12	6	18	1	1	1	1	1	1	4	4	4	12	6	18
16	2021-12-03	Senior Two	male	16	6-8h/d	Specialties	Specialties	1.09091	5	5	5	1	1	1	2	2.85714	1	2	1	1	2	1	1	1.28571	1.74459	1	1	1	1	3	3	4	4	4	12	10	22	1	1	4	4	4	3	4	4	4	12	17	29
17	2021-12-03	Senior Two	female	17	＜6h/d	Specialties	Specialties	1.18182	4	3	2	1	1	2	2	2.14286	1	4	1	1	4	2	2	2.14286	1.82251	3	2	3	3	2	1	3	3	3	9	14	23	2	3	2	2	3	2	3	3	3	9	14	23
18	2021-12-03	Senior Two	female	17	6-8h/d	High school and blow	High school and blow	1.54545	5	2	3	1	1	5	2	2.71429	3	5	3	3	5	2	2	3.28571	2.51515	4	3	4	2	2	3	3	3	3	9	18	27	4	2	2	4	4	2	3	3	3	9	18	27
19	2021-12-03	Senior Two	male	16	6-8h/d	Undergraduate	Undergraduate	2.68182	5	4	4	3	1	3	3	3.28571	2	3	1	2	1	2	3	2	2.65584	3	3	3	3	3	3	2	2	2	6	18	24	3	3	3	4	3	4	2	1	2	5	20	25
20	2021-12-03	Senior Two	female	16	6-8h/d	Undergraduate	Undergraduate	1.18182	4	1	2	1	1	1	1	1.57143	2	1	2	1	1	3	3	1.85714	1.5368	3	3	3	3	3	3	3	3	3	9	18	27	3	3	3	3	3	3	3	3	3	9	18	27
21	2021-12-03	Senior Two	male	17	6-8h/d	High school and blow	High school and blow	1.68182	2	1	1	1	3	1	2	1.57143	3	3	3	3	3	3	3	3	2.08442	3	3	3	3	3	3	2	2	2	6	18	24	3	3	3	3	3	3	2	2	2	6	18	24
22	2021-12-03	Senior Two	female	16	6-8h/d	High school and blow	High school and blow	1.90909	5	1	2	1	3	3	2	2.42857	3	3	3	3	3	3	3	3	2.44589	2	2	2	2	2	2	3	3	2	8	12	20	2	2	2	2	2	2	3	3	2	8	12	20
23	2021-12-03	Senior Two	male	17	6-8h/d	High school and blow	High school and blow	1.22727	5	1	2	2	1	2	2	2.14286	2	2	2	2	2	1	1	1.71429	1.69481	3	2	2	2	2	2	2	2	2	6	13	19	3	2	2	2	2	2	2	2	2	6	13	19
24	2021-12-03	Senior Two	female	16	6-8h/d	Specialties	Specialties	1.18182	3	1	2	1	2	4	2	2.14286	1	3	3	3	3	3	3	2.71429	2.01299	3	3	3	3	3	3	2	2	2	6	18	24	3	3	3	3	3	3	2	2	2	6	18	24
25	2021-12-03	Senior Two	female	16	＜6h/d	Specialties	Specialties	1.31818	3	1	3	1	1	3	2	2	2	2	2	2	2	2	4	2.28571	1.86797	3	3	3	3	3	2	4	4	4	12	17	29	3	3	3	3	3	2	4	4	4	12	17	29
26	2021-12-03	Senior Two	female	17	＜6h/d	High school and blow	High school and blow	1.13636	5	1	1	1	1	1	1	1.57143	1	1	1	1	1	1	1	1	1.23593	3	3	3	3	3	3	2	2	2	6	18	24	3	3	3	3	3	3	2	2	2	6	18	24
27	2021-12-03	Senior Two	male	17	6-8h/d	Undergraduate	Undergraduate	1.27273	4	1	1	1	1	3	2	1.85714	2	1	1	1	2	3	3	1.85714	1.66234	2	3	2	3	3	2	4	4	4	12	15	27	2	2	2	2	2	2	3	3	3	9	12	21
28	2021-12-03	Senior Two	male	17	＜6h/d	Specialties	High school and blow	1.13636	5	2	2	2	1	3	1	2.28571	1	4	1	1	4	2	2	2.14286	1.85498	1	1	1	1	1	1	4	4	4	12	6	18	1	1	1	1	1	1	4	4	4	12	6	18
29	2021-12-03	Senior Two	male	16	＜6h/d	Specialties	High school and blow	1.45455	5	2	2	2	1	3	1	2.28571	1	4	1	1	4	2	2	2.14286	1.96104	1	1	1	1	1	1	4	4	4	12	6	18	1	1	1	1	1	1	4	4	4	12	6	18
30	2021-12-03	Senior Two	female	16	＜6h/d	High school and blow	High school and blow	1.09091	4	2	5	2	1	1	2	2.42857	3	4	3	3	4	4	4	3.57143	2.36364	1	1	1	1	1	1	4	4	4	12	6	18	1	1	1	1	1	1	4	4	4	12	6	18
31	2021-12-03	Senior Two	male	16	6-8h/d	Specialties	Undergraduate	1.81818	4	1	2	3	1	3	4	2.57143	3	4	3	3	4	4	4	3.57143	2.65368	3	3	3	3	3	3	3	3	3	9	18	27	3	3	3	3	3	3	3	3	3	9	18	27
32	2021-12-03	Senior Two	female	16	6-8h/d	Specialties	High school and blow	1.18182	4	2	2	1	1	3	1	2	1	2	1	1	2	2	2	1.57143	1.58442	1	1	1	1	1	1	4	4	4	12	6	18	1	1	1	1	1	1	4	4	4	12	6	18
33	2021-12-03	Senior Two	female	16	6-8h/d	High school and blow	High school and blow	1.22727	3	1	2	2	1	4	3	2.28571	1	2	1	1	2	2	2	1.57143	1.69481	4	2	3	4	3	2	2	2	2	6	18	24	2	2	2	3	2	2	3	3	3	9	13	22
34	2021-12-03	Senior Two	female	16	＜6h/d	High school and blow	High school and blow	1.54545	3	1	2	1	2	4	5	2.57143	2	2	2	2	2	1	1	1.71429	1.94372	3	2	3	4	3	3	4	3	2	9	18	27	2	3	3	3	3	2	4	3	2	9	16	25
35	2021-12-03	Senior Two	male	16	6-8h/d	High school and blow	High school and blow	1.59091	5	1	3	1	1	3	2	2.28571	1	2	1	1	2	1	1	1.28571	1.72078	3	3	3	3	3	2	2	3	2	7	17	24	2	3	2	2	3	3	3	2	3	8	15	23
36	2021-12-03	Senior Two	male	16	6-8h/d	High school and blow	High school and blow	1.18182	4	3	3	3	1	3	2	2.71429	2	2	2	2	2	2	2	2	1.96537	3	3	3	3	3	2	2	2	2	6	17	23	3	3	3	3	3	2	3	3	3	9	17	26
37	2021-12-03	Senior Two	female	16	6-8h/d	High school and blow	High school and blow	1.31818	4	1	1	2	2	2	4	2.28571	3	3	3	3	3	2	2	2.71429	2.10606	2	1	1	1	1	1	4	3	3	10	7	17	2	1	1	1	1	1	1	2	2	5	7	12
38	2021-12-03	Senior Two	male	17	6-8h/d	High school and blow	High school and blow	1.54545	4	1	2	3	2	4	3	2.71429	1	1	1	2	2	2	2	1.57143	1.94372	3	3	3	3	3	3	2	2	2	6	18	24	3	3	3	3	3	3	2	2	2	6	18	24
39	2021-12-03	Senior Two	male	16	＜6h/d	Undergraduate	Specialties	1.40909	4	1	1	2	2	3	1	2	1	1	1	1	1	3	3	1.57143	1.66017	3	3	3	3	3	3	2	2	2	6	18	24	3	3	3	3	3	3	2	2	2	6	18	24
40	2021-12-03	Senior Two	female	16	＜6h/d	High school and blow	Undergraduate	1.22727	3	1	1	1	2	2	2	1.71429	2	3	2	2	3	2	2	2.28571	1.74242	3	3	2	2	3	2	3	3	3	9	15	24	4	4	2	3	2	2	3	3	3	9	17	26
41	2021-12-03	Senior Two	male	17	6-8h/d	Specialties	Specialties	1.36364	5	1	1	1	1	1	2	1.71429	2	4	2	2	4	2	2	2.57143	1.88312	4	3	3	2	3	2	3	2	3	8	17	25	4	4	4	2	3	2	2	2	2	6	19	25
42	2021-12-03	Senior Two	female	16	6-8h/d	High school and blow	High school and blow	1.5	4	1	2	2	1	3	1	2	1	2	1	1	2	1	1	1.28571	1.59524	3	3	3	3	3	3	3	3	4	10	18	28	3	3	3	3	3	3	3	3	4	10	18	28
43	2021-12-03	Senior Two	male	16	6-8h/d	High school and blow	High school and blow	1.09091	5	1	3	1	1	3	2	2.28571	1	2	1	1	2	1	1	1.28571	1.55411	3	3	3	3	3	3	3	3	3	9	18	27	3	3	3	3	3	3	3	3	3	9	18	27
44	2021-12-03	Senior Two	female	17	8-10h/d	High school and blow	High school and blow	1.45455	4	1	1	1	1	1	1	1.42857	1	1	1	1	1	2	2	1.28571	1.38961	1	1	1	1	1	1	4	4	4	12	6	18	1	1	1	1	1	1	4	4	4	12	6	18
45	2021-12-03	Senior Two	female	17	＜6h/d	Undergraduate	High school and blow	1.09091	1	1	1	1	1	1	1	1	1	2	1	1	1	2	1	1.28571	1.12554	4	3	3	3	3	3	3	3	3	9	19	28	3	3	3	3	3	3	3	3	3	9	18	27
46	2021-12-03	Senior Two	female	16	6-8h/d	High school and blow	High school and blow	1.45455	5	1	2	1	1	3	3	2.28571	1	1	1	1	1	1	1	1	1.58009	3	2	2	3	2	3	3	3	4	10	15	25	3	3	3	2	2	3	4	4	4	12	16	28
47	2021-12-03	Senior Two	female	16	＜6h/d	Specialties	Specialties	1.22727	5	1	1	1	1	4	2	2.14286	1	1	1	1	1	1	1	1	1.45671	1	3	3	3	1	1	4	2	4	10	12	22	1	1	3	3	1	1	4	2	4	10	10	20
48	2021-12-03	Senior Two	female	16	6-8h/d	High school and blow	High school and blow	1.31818	3	1	1	1	1	2	2	1.57143	1	2	1	1	2	1	1	1.28571	1.39177	3	1	1	1	1	1	3	3	3	9	8	17	3	1	1	1	1	1	1	1	1	3	8	11
49	2021-12-03	Senior Two	male	17	6-8h/d	High school and blow	High school and blow	1.45455	5	1	5	1	1	4	2	2.71429	5	5	5	5	5	5	5	5	3.05628	4	4	4	4	1	1	4	1	4	9	18	27	4	4	4	4	1	1	4	1	4	9	18	27
50	2021-12-02	Senior One	male	16	6-8h/d	Undergraduate	Undergraduate	1.54545	5	2	4	2	1	2	2	2.57143	2	2	2	2	2	1	1	1.71429	1.94372	2	2	2	3	3	3	3	2	2	7	15	22	4	4	4	3	3	3	2	2	2	6	21	27
51	2021-12-01	Senior One	male	16	6-8h/d	High school and blow	High school and blow	1.86364	4	1	3	3	1	3	2	2.42857	1	3	3	4	1	2	2	2.28571	2.19264	3	4	3	4	4	3	4	4	4	12	21	33	3	3	4	4	3	1	4	4	4	12	18	30
52	2021-12-01	Senior One	male	16	＜6h/d	High school and blow	High school and blow	1.04545	2	1	1	1	1	2	2	1.42857	1	1	1	1	1	1	1	1	1.15801	4	4	4	3	3	3	3	3	3	9	21	30	4	4	4	3	3	3	3	3	3	9	21	30
53	2021-12-01	Senior One	male	16	8-10h/d	Undergraduate	Undergraduate	1.18182	4	1	1	1	1	2	2	1.71429	1	1	1	1	1	2	2	1.28571	1.39394	3	3	3	3	2	3	3	3	3	9	17	26	3	3	2	2	2	2	3	3	3	9	14	23
54	2021-12-01	Senior One	male	16	6-8h/d	High school and blow	High school and blow	2.27273	4	1	2	3	3	3	2	2.57143	1	1	1	1	1	3	3	1.57143	2.13853	3	3	2	3	2	2	3	3	3	9	15	24	3	3	3	3	3	3	3	3	3	9	18	27
55	2021-12-01	Senior One	female	15	＜6h/d	High school and blow	High school and blow	1.27273	5	1	1	1	3	4	3	2.57143	1	2	4	1	4	5	5	3.14286	2.329	2	2	2	3	3	2	3	3	3	9	14	23	2	2	2	2	3	2	3	3	3	9	13	22
56	2021-12-01	Senior One	female	15	6-8h/d	High school and blow	High school and blow	1.63636	4	1	2	1	1	3	2	2	1	2	2	2	2	4	4	2.42857	2.02165	4	3	2	2	3	2	3	3	2	8	16	24	1	3	2	2	2	2	2	3	2	7	12	19
57	2021-12-01	Senior One	female	15	6-8h/d	Specialties	High school and blow	1.13636	5	2	1	1	2	3	3	2.42857	1	1	1	1	1	2	2	1.28571	1.61688	3	3	3	2	2	3	3	3	3	9	16	25	3	2	2	3	2	2	3	3	3	9	14	23
58	2021-12-01	Senior One	male	15	6-8h/d	High school and blow	High school and blow	1.13636	3	1	1	1	1	3	2	1.71429	1	1	1	3	3	1	1	1.57143	1.47403	3	1	1	1	2	2	4	4	4	12	10	22	1	1	1	1	1	1	4	4	4	12	6	18
59	2021-12-01	Senior One	female	14	6-8h/d	Specialties	Specialties	1	5	1	1	1	1	1	1	1.57143	1	1	1	1	1	1	1	1	1.19048	2	2	2	1	3	1	1	2	2	5	11	16	2	2	2	1	3	1	1	2	2	5	11	16
60	2021-12-01	Senior One	female	15	6-8h/d	Undergraduate	Undergraduate	1.31818	3	1	1	2	3	3	4	2.42857	2	2	2	2	2	2	2	2	1.91558	3	3	2	2	4	4	2	3	3	8	18	26	3	3	2	2	4	4	2	3	3	8	18	26
61	2021-12-01	Senior One	female	15	6-8h/d	High school and blow	High school and blow	1.31818	4	1	1	1	1	4	2	2	2	2	2	2	2	2	2	2	1.77273	3	3	3	3	2	2	3	3	3	9	16	25	3	3	3	3	3	2	3	3	3	9	17	26
62	2021-12-01	Senior One	male	15	＜6h/d	Specialties	Undergraduate	1.13636	5	1	1	2	1	2	1	1.85714	1	1	1	1	1	1	3	1.28571	1.42641	3	2	2	2	4	3	3	3	3	9	16	25	3	3	3	3	3	3	3	3	3	9	18	27
63	2021-12-02	Senior One	male	15	6-8h/d	Specialties	Specialties	1.54545	3	3	3	3	3	3	2	2.85714	1	1	2	2	4	2	2	2	2.1342	3	4	3	3	3	4	2	2	1	5	20	25	3	3	4	3	3	4	2	1	1	4	20	24
64	2021-12-01	Senior One	male	15	6-8h/d	High school and blow	High school and blow	1.36364	5	1	3	3	2	3	1	2.57143	2	2	2	2	2	2	2	2	1.97835	3	3	3	3	2	2	3	3	3	9	16	25	3	3	3	3	2	2	3	3	3	9	16	25
65	2021-12-01	Senior One	male	16	＜6h/d	Specialties	Specialties	1.54545	5	3	3	5	1	5	3	3.57143	2	4	2	4	2	5	5	3.42857	2.84848	3	2	3	4	4	3	3	4	4	11	19	30	3	3	3	3	2	2	3	3	3	9	16	25
66	2021-12-01	Senior One	female	15	＜6h/d	High school and blow	Undergraduate	1.40909	4	2	1	1	1	4	2	2.14286	1	2	1	2	2	1	1	1.42857	1.66017	3	3	3	2	2	3	3	3	3	9	16	25	4	3	3	2	2	3	3	3	3	9	17	26
67	2021-12-01	Senior One	female	15	6-8h/d	Specialties	Specialties	1.18182	3	2	2	1	1	1	1	1.57143	1	1	1	1	1	1	1	1	1.25108	3	3	3	3	3	3	2	2	2	6	18	24	4	4	4	4	4	4	1	1	1	3	24	27
68	2021-12-01	Senior One	female	16	6-8h/d	High school and blow	Undergraduate	1.18182	4	1	1	1	1	1	2	1.57143	1	4	1	1	4	1	1	1.85714	1.5368	3	3	3	3	4	4	4	4	4	12	20	32	3	2	2	3	3	3	4	4	4	12	16	28
69	2021-12-01	Senior One	male	16	＜6h/d	High school and blow	High school and blow	1.13636	3	1	1	1	1	3	2	1.71429	1	2	1	1	2	2	2	1.57143	1.47403	2	2	2	2	2	2	3	3	3	9	12	21	2	2	2	2	2	2	3	3	3	9	12	21
70	2021-12-01	Senior One	female	17	6-8h/d	High school and blow	High school and blow	1.31818	4	1	1	1	1	4	3	2.14286	3	3	3	3	3	2	2	2.71429	2.05844	3	3	3	1	1	2	3	3	4	10	13	23	3	3	3	1	1	2	3	3	4	10	13	23
71	2021-12-01	Senior One	female	15	＜6h/d	Specialties	Specialties	1.04545	3	1	1	1	1	2	1	1.42857	1	1	1	1	2	1	1	1.14286	1.20563	2	3	2	2	4	2	3	3	3	9	15	24	4	2	2	4	2	2	3	3	3	9	16	25
72	2021-12-01	Senior One	female	15	6-8h/d	High school and blow	High school and blow	1.54545	4	1	1	1	3	4	3	2.42857	1	2	2	1	3	3	2	2	1.99134	3	3	3	3	3	3	3	2	3	8	18	26	3	3	3	3	3	3	3	3	3	9	18	27
73	2021-12-01	Senior One	male	16	6-8h/d	Postgraduate and above	Postgraduate and above	1.04545	4	3	1	1	1	2	2	2	1	1	1	1	1	1	1	1	1.34848	4	1	1	1	1	3	4	4	4	12	11	23	4	3	2	3	1	2	4	3	4	11	15	26
74	2021-12-01	Senior One	male	16	6-8h/d	Specialties	Undergraduate	1.13636	3	2	1	1	1	1	1	1.42857	1	1	1	1	1	2	2	1.28571	1.28355	3	3	3	3	3	3	3	3	3	9	18	27	3	3	3	2	3	2	3	3	3	9	16	25
75	2021-12-01	Senior One	male	16	6-8h/d	High school and blow	High school and blow	1.27273	4	1	1	2	1	2	2	1.85714	1	1	2	2	2	3	3	2	1.70996	3	3	3	2	2	3	4	4	4	12	16	28	2	2	3	2	2	2	3	3	3	9	13	22
76	2021-12-01	Senior One	male	15	6-8h/d	High school and blow	High school and blow	1.36364	5	1	5	5	1	5	4	3.71429	3	3	3	3	3	4	4	3.28571	2.78788	3	2	3	2	3	2	2	3	3	8	15	23	3	2	3	2	3	3	2	3	3	8	16	24
77	2021-12-01	Senior One	male	15	6-8h/d	Undergraduate	Undergraduate	1.22727	5	1	3	3	3	5	5	3.57143	3	3	3	3	3	3	3	3	2.59957	3	3	3	3	3	3	3	3	3	9	18	27	4	4	4	4	4	4	4	4	4	12	24	36
78	2021-12-03	Senior One	female	17	＜6h/d	High school and blow	High school and blow	1.27273	3	1	1	1	2	1	1	1.42857	4	4	4	4	4	4	4	4	2.23377	2	2	2	2	4	3	3	3	3	9	15	24	3	3	3	2	4	4	3	3	3	9	19	28
79	2021-12-01	Senior One	male	15	6-8h/d	Specialties	Specialties	1.27273	3	1	1	1	1	1	2	1.42857	1	2	1	1	2	1	1	1.28571	1.329	3	3	2	2	2	3	3	3	3	9	15	24	3	3	2	2	2	3	3	3	3	9	15	24
80	2021-12-01	Senior One	male	15	6-8h/d	Specialties	Specialties	1.59091	4	2	1	3	3	4	4	3	2	3	2	2	3	4	4	2.85714	2.48268	3	3	3	3	3	3	4	4	2	10	18	28	3	3	3	3	3	3	3	3	2	8	18	26
81	2021-12-01	Senior One	female	16	＜6h/d	Specialties	High school and blow	1.31818	4	1	1	1	2	2	2	1.85714	1	2	1	1	2	2	1	1.42857	1.53463	4	4	4	4	4	3	3	2	3	8	23	31	4	4	4	4	4	3	3	2	3	8	23	31
82	2021-12-02	Senior One	male	16	6-8h/d	Specialties	Specialties	1.18182	5	2	4	5	1	3	4	3.42857	5	5	5	5	5	5	5	5	3.20346	4	4	4	4	4	4	1	1	1	3	24	27	4	4	4	4	4	4	1	1	1	3	24	27
83	2021-12-01	Senior One	male	16	6-8h/d	Undergraduate	High school and blow	1.5	5	1	4	3	2	5	4	3.42857	4	4	4	4	4	5	5	4.28571	3.07143	2	2	3	4	4	4	2	3	2	7	19	26	3	4	4	4	4	1	2	2	2	6	20	26
84	2021-12-01	Senior One	male	15	6-8h/d	Specialties	Undergraduate	1.27273	5	2	3	3	3	1	3	2.85714	1	2	1	1	2	3	3	1.85714	1.99567	4	2	2	2	2	2	3	2	2	7	14	21	4	3	3	2	3	2	3	3	3	9	17	26
85	2021-12-01	Senior One	female	16	6-8h/d	High school and blow	High school and blow	2.81818	3	4	3	1	2	4	4	3	2	3	1	4	5	5	5	3.57143	3.12987	4	4	4	4	4	4	4	4	4	12	24	36	4	4	4	4	4	4	4	4	4	12	24	36
86	2021-12-01	Senior One	female	16	6-8h/d	High school and blow	Undergraduate	1.31818	4	1	1	1	1	4	2	2	2	2	2	2	2	2	2	2	1.77273	3	3	3	3	3	2	3	3	3	9	17	26	3	3	3	3	3	2	3	3	3	9	17	26
87	2021-12-01	Senior One	female	15	6-8h/d	High school and blow	High school and blow	1.27273	4	1	1	1	2	4	3	2.28571	1	1	1	1	1	1	1	1	1.51948	2	2	2	2	2	2	3	3	3	9	12	21	3	3	3	2	2	2	3	3	3	9	15	24
88	2021-12-02	Senior One	female	15	6-8h/d	Undergraduate	Specialties	1.27273	5	1	3	1	1	4	3	2.57143	1	1	1	1	1	1	1	1	1.61472	4	4	4	4	4	4	1	1	1	3	24	27	4	4	4	4	4	4	1	1	1	3	24	27
89	2021-12-01	Senior One	male	15	＜6h/d	High school and blow	High school and blow	1.18182	4	3	3	1	1	1	5	2.57143	1	1	1	1	1	2	2	1.28571	1.67965	4	4	4	4	3	2	3	3	3	9	21	30	4	4	4	4	3	3	2	2	2	6	22	28
90	2021-12-01	Senior One	female	15	6-8h/d	High school and blow	High school and blow	1.77273	4	1	2	1	2	2	2	2	3	3	2	2	4	4	2	2.85714	2.20996	3	3	4	3	4	4	2	2	2	6	21	27	4	4	4	4	4	3	2	2	1	5	23	28
91	2021-12-01	Senior One	female	16	＜6h/d	Undergraduate	Undergraduate	1.40909	5	2	2	1	1	4	2	2.42857	1	2	1	1	2	4	1	1.71429	1.85065	4	4	4	4	3	2	3	3	3	9	21	30	4	4	4	4	3	2	3	3	3	9	21	30
92	2021-12-01	Senior One	male	15	＜6h/d	High school and blow	High school and blow	1.22727	4	1	1	3	1	3	3	2.28571	2	2	2	2	2	5	1	2.28571	1.9329	2	2	2	2	3	2	3	3	3	9	13	22	2	2	2	2	2	2	3	3	3	9	12	21
93	2021-12-01	Senior One	male	15	6-8h/d	High school and blow	High school and blow	1.18182	4	1	2	2	2	2	2	2.14286	1	2	1	1	4	2	4	2.14286	1.82251	3	2	3	2	4	3	4	3	2	9	17	26	4	2	2	2	4	3	2	3	3	8	17	25
94	2021-12-01	Senior One	female	15	＜6h/d	High school and blow	High school and blow	1.13636	4	1	1	1	2	1	1	1.57143	1	1	1	1	1	1	2	1.14286	1.28355	3	2	4	2	2	3	3	3	3	9	16	25	3	2	2	2	2	3	3	3	3	9	14	23
95	2021-12-01	Senior One	male	15	＜6h/d	Specialties	Specialties	1.27273	5	1	3	2	2	4	2	2.71429	2	4	2	2	4	3	3	2.85714	2.28139	3	3	3	3	3	3	3	3	3	9	18	27	3	3	3	3	3	3	3	3	3	9	18	27
96	2021-12-01	Senior One	female	15	＜6h/d	Undergraduate	Specialties	1.18182	3	1	1	1	1	3	2	1.71429	2	2	2	2	2	2	2	2	1.63203	4	3	3	1	1	1	1	1	1	3	13	16	2	2	2	2	2	2	2	2	2	6	12	18
97	2021-12-01	Senior One	female	15	＜6h/d	Specialties	Specialties	1.13636	4	1	1	2	2	3	2	2.14286	2	2	2	2	2	2	2	2	1.75974	3	3	3	3	3	3	3	3	3	9	18	27	3	3	3	3	3	3	3	3	3	9	18	27
98	2021-12-01	Senior One	male	15	6-8h/d	Specialties	Undergraduate	1.09091	3	1	1	1	1	1	2	1.42857	1	1	1	1	1	2	2	1.28571	1.2684	3	3	3	3	3	3	3	3	3	9	18	27	3	3	3	3	3	3	3	3	3	9	18	27
99	2021-12-01	Senior One	female	15	6-8h/d	Specialties	Undergraduate	1.09091	3	1	1	1	1	3	3	1.85714	1	1	1	1	1	1	1	1	1.31602	2	3	2	3	3	3	3	3	3	9	16	25	2	3	2	3	3	3	3	3	3	9	16	25
100	2021-12-02	Senior One	female	15	6-8h/d	Undergraduate	Specialties	1.13636	4	1	1	1	1	1	1	1.42857	1	1	1	1	1	1	1	1	1.18831	2	3	3	2	2	2	3	3	3	9	14	23	3	2	2	2	2	2	3	3	3	9	13	22
101	2021-12-01	Second Year	male	13	6-8h/d	High school and blow	High school and blow	1.27273	5	5	5	1	1	1	1	2.71429	2	2	2	1	1	2	2	1.71429	1.90043	3	3	2	2	2	2	3	1	1	5	14	19	3	3	3	1	1	1	4	2	1	7	12	19
102	2021-12-01	Second Year	female	13	6-8h/d	Undergraduate	Undergraduate	2.36364	4	2	2	2	2	5	5	3.14286	4	5	4	4	4	3	3	3.85714	3.12121	4	4	3	4	4	2	3	2	4	9	21	30	4	4	4	4	4	4	4	4	3	11	24	35
103	2021-12-01	Second Year	male	14	6-8h/d	Specialties	Specialties	1.72727	4	4	4	5	5	5	5	4.57143	4	4	4	4	4	4	4	4	3.4329	4	4	4	4	4	4	3	3	3	9	24	33	4	4	4	4	4	4	3	3	3	9	24	33
104	2021-12-01	Second Year	male	14	6-8h/d	High school and blow	High school and blow	1.95455	3	2	1	1	1	1	1	1.42857	1	1	1	1	1	1	1	1	1.46104	1	1	1	1	2	1	4	4	4	12	7	19	1	1	1	1	1	1	4	4	4	12	6	18
105	2021-12-01	Second Year	female	13	＞10h/d	High school and blow	High school and blow	1.09091	3	1	1	1	1	1	1	1.28571	1	1	1	1	1	2	1	1.14286	1.17316	4	4	4	4	4	4	4	4	4	12	24	36	4	4	4	4	4	4	4	4	4	12	24	36
106	2021-12-01	Second Year	male	14	8-10h/d	Specialties	Specialties	1.18182	5	4	1	3	1	2	5	3	4	4	4	4	4	5	5	4.28571	2.82251	4	4	4	4	4	4	1	1	1	3	24	27	4	4	4	4	4	4	1	1	1	3	24	27
107	2021-12-01	Second Year	female	15	6-8h/d	Specialties	Specialties	1.18182	3	1	1	1	1	1	1	1.28571	1	1	2	1	1	2	2	1.42857	1.2987	2	3	3	3	3	4	2	3	2	7	18	25	3	3	3	3	2	3	2	3	3	8	17	25
108	2021-12-01	Second Year	male	13	8-10h/d	High school and blow	Undergraduate	1.90909	4	3	5	2	1	4	3	3.14286	4	4	3	5	4	2	2	3.42857	2.82684	2	1	1	2	3	3	1	1	1	3	12	15	2	2	2	2	2	2	3	3	3	9	12	21
109	2021-12-01	Second Year	female	13	＜6h/d	Undergraduate	Undergraduate	2.13636	5	2	2	2	1	4	5	3	3	2	3	3	2	2	1	2.28571	2.47403	1	1	1	1	1	1	4	4	4	12	6	18	4	3	3	3	1	1	4	4	3	11	15	26
110	2021-12-01	Second Year	male	14	8-10h/d	High school and blow	High school and blow	2.81818	5	1	1	5	5	5	4	3.71429	5	5	5	5	5	4	4	4.71429	3.74892	4	3	3	2	1	3	3	4	4	11	16	27	4	2	2	2	2	1	4	4	4	12	13	25
111	2021-12-01	Second Year	male	13	8-10h/d	High school and blow	High school and blow	2.09091	3	2	2	1	1	3	3	2.14286	1	1	1	1	1	2	2	1.28571	1.83983	3	3	3	3	3	3	4	4	4	12	18	30	3	3	3	3	3	3	4	4	4	12	18	30
112	2021-12-01	Second Year	male	13	6-8h/d	Specialties	Specialties	2.18182	3	3	3	3	1	3	2	2.57143	4	4	4	4	4	2	2	3.42857	2.72727	3	2	3	2	3	2	1	2	2	5	15	20	3	3	3	3	3	3	3	3	2	8	18	26
113	2021-12-01	Second Year	female	18	8-10h/d	High school and blow	High school and blow	1.90909	5	2	5	3	3	5	2	3.57143	4	4	3	4	3	4	4	3.71429	3.06494	3	3	3	3	3	3	2	3	3	8	18	26	3	3	3	3	3	3	2	2	2	6	18	24
114	2021-12-01	Second Year	female	14	8-10h/d	High school and blow	High school and blow	2.31818	4	1	1	2	2	3	2	2.14286	2	3	2	3	2	3	4	2.71429	2.39177	3	4	4	3	2	3	4	4	4	12	19	31	2	3	4	4	2	2	4	4	4	12	17	29
115	2021-12-01	Second Year	male	13	8-10h/d	High school and blow	High school and blow	1.40909	4	4	4	2	2	3	4	3.28571	5	5	5	5	5	3	3	4.42857	3.04113	4	4	4	2	4	4	3	3	3	9	22	31	4	4	4	2	4	4	3	3	3	9	22	31
116	2021-12-01	Second Year	male	13	6-8h/d	Specialties	Specialties	1.22727	3	2	1	1	1	1	2	1.57143	4	4	4	4	4	4	4	4	2.26623	3	3	3	3	3	3	2	2	2	6	18	24	3	3	3	3	3	3	2	2	2	6	18	24
117	2021-12-01	Second Year	male	13	8-10h/d	High school and blow	High school and blow	1.59091	5	5	5	3	1	5	3	3.85714	3	5	3	3	3	2	2	3	2.81602	3	3	3	3	3	3	2	2	2	6	18	24	3	3	3	3	3	3	2	2	2	6	18	24
118	2021-12-01	Second Year	male	13	8-10h/d	High school and blow	High school and blow	1.77273	5	2	2	4	4	3	2	3.14286	2	2	2	1	1	1	2	1.57143	2.16234	4	4	4	4	4	4	1	1	1	3	24	27	2	3	2	3	4	3	3	3	3	9	17	26
119	2021-12-01	Second Year	female	14	6-8h/d	Specialties	High school and blow	1.5	4	1	2	1	2	5	3	2.57143	1	1	1	5	1	2	2	1.85714	1.97619	2	1	1	3	3	2	3	1	1	5	12	17	2	1	1	2	3	2	2	2	2	6	11	17
120	2021-12-01	Second Year	male	13	8-10h/d	High school and blow	High school and blow	1.04545	3	2	2	4	4	3	2	2.85714	2	2	2	2	2	2	2	2	1.96753	3	3	3	3	3	3	3	3	3	9	18	27	3	3	3	3	3	3	3	3	3	9	18	27
121	2021-12-01	Second Year	male	13	6-8h/d	Undergraduate	Undergraduate	4.09091	3	1	1	3	3	1	3	2.14286	5	5	5	5	5	5	5	5	3.74459	4	4	4	4	4	4	1	1	1	3	24	27	4	4	4	4	4	4	1	1	1	3	24	27
122	2021-12-01	Second Year	male	13	8-10h/d	Specialties	Specialties	3.09091	3	2	2	3	1	1	2	2	1	1	1	1	1	1	1	1	2.0303	3	3	3	3	3	3	2	2	2	6	18	24	3	3	3	3	3	3	2	2	2	6	18	24
123	2021-12-01	Second Year	male	13	6-8h/d	Specialties	Specialties	1.72727	5	3	1	1	4	4	3	3	2	2	2	2	2	3	3	2.28571	2.33766	3	3	3	3	3	3	3	3	3	9	18	27	3	3	3	3	3	3	3	3	3	9	18	27
124	2021-12-01	Second Year	male	14	＞10h/d	Specialties	Specialties	2.45455	5	1	1	5	5	5	5	3.85714	5	5	5	5	5	5	5	5	3.77056	1	1	1	1	1	1	4	4	4	12	6	18	1	1	1	1	1	1	4	4	4	12	6	18
125	2021-12-01	Second Year	female	14	6-8h/d	High school and blow	High school and blow	1.68182	3	2	2	2	4	2	2	2.42857	1	1	1	1	1	4	2	1.57143	1.89394	4	2	3	3	4	3	2	1	3	6	19	25	3	3	3	3	3	3	3	2	2	7	18	25
126	2021-12-01	Second Year	male	13	6-8h/d	High school and blow	Specialties	1.68182	1	1	1	1	1	3	1	1.28571	2	1	1	2	1	1	2	1.42857	1.46537	2	2	2	2	3	3	4	4	4	12	14	26	3	3	3	3	3	3	2	2	2	6	18	24
127	2021-12-01	Second Year	male	13	8-10h/d	Specialties	Specialties	1.45455	4	1	2	5	1	1	3	2.42857	3	3	3	3	3	3	3	3	2.29437	4	4	4	4	4	4	1	1	1	3	24	27	4	4	4	4	4	4	1	1	1	3	24	27
128	2021-12-01	Second Year	female	13	6-8h/d	High school and blow	High school and blow	1.31818	3	1	1	1	1	1	2	1.42857	2	2	2	2	2	2	2	2	1.58225	3	3	3	3	3	3	3	3	3	9	18	27	3	3	3	3	2	2	4	4	4	12	16	28
129	2021-12-01	Second Year	male	14	6-8h/d	High school and blow	High school and blow	1.63636	3	2	2	1	1	3	3	2.14286	2	2	2	2	2	2	2	2	1.92641	1	1	1	1	1	1	4	4	4	12	6	18	1	1	1	1	1	1	4	4	4	12	6	18
130	2021-12-01	Second Year	male	13	8-10h/d	Undergraduate	Undergraduate	2.18182	3	3	4	5	5	5	5	4.28571	5	5	4	3	3	4	4	4	3.48918	4	4	4	4	4	4	3	3	3	9	24	33	4	4	4	4	4	4	3	3	3	9	24	33
131	2021-12-01	Second Year	female	13	6-8h/d	High school and blow	High school and blow	1.18182	4	2	1	1	1	4	3	2.28571	1	1	1	1	1	1	1	1	1.48918	2	2	2	2	2	2	3	3	3	9	12	21	2	2	2	2	2	2	3	3	3	9	12	21
132	2021-12-01	Second Year	male	14	6-8h/d	Specialties	Specialties	1.27273	3	1	1	1	1	1	1	1.28571	2	2	2	2	2	1	1	1.71429	1.42424	3	3	3	3	3	3	2	2	2	6	18	24	3	3	3	3	3	3	2	2	2	6	18	24
133	2021-12-01	Second Year	female	13	6-8h/d	Specialties	Specialties	2.36364	5	1	1	5	5	5	5	3.85714	5	5	5	5	4	5	5	4.85714	3.69264	3	3	3	3	3	2	2	2	2	6	17	23	2	3	3	3	2	3	2	3	2	7	16	23
134	2021-12-01	Second Year	male	13	8-10h/d	Postgraduate and above	Postgraduate and above	4.63636	3	4	4	3	1	3	3	3	4	4	4	5	4	4	4	4.14286	3.92641	4	4	4	4	4	4	1	1	1	3	24	27	4	4	4	4	4	4	1	1	1	3	24	27
135	2021-12-01	Second Year	female	13	6-8h/d	Specialties	Specialties	1.18182	4	1	2	1	2	4	2	2.28571	2	4	4	3	3	3	3	3.14286	2.20346	1	1	1	1	1	4	1	1	1	3	9	12	4	4	4	4	4	4	1	1	1	3	24	27
136	2021-12-02	Second Year	male	16	6-8h/d	High school and blow	High school and blow	1.77273	5	2	2	5	4	4	4	3.71429	2	2	2	2	2	4	4	2.57143	2.68615	4	4	4	4	4	4	1	1	1	3	24	27	4	4	4	4	4	4	1	1	1	3	24	27
137	2021-12-01	Second Year	male	16	6-8h/d	High school and blow	High school and blow	1	1	1	1	1	1	1	1	1	1	1	1	1	1	1	1	1	1	3	3	3	3	3	3	3	3	3	9	18	27	3	3	3	3	3	3	2	3	3	8	18	26
138	2021-12-02	Second Year	female	17	＜6h/d	High school and blow	High school and blow	1.36364	3	1	1	1	1	1	2	1.42857	1	1	1	2	2	1	1	1.28571	1.35931	4	3	2	1	1	1	4	4	4	12	12	24	2	2	2	2	2	2	3	3	3	9	12	21
139	2021-12-02	Second Year	female	16	6-8h/d	Undergraduate	Undergraduate	1.31818	5	2	2	2	2	3	2	2.57143	2	3	2	2	3	2	2	2.28571	2.05844	4	2	3	2	3	2	4	4	4	12	16	28	4	2	3	2	3	2	4	4	4	12	16	28
140	2021-12-02	Senior Two	female	16	6-8h/d	Specialties	High school and blow	1.40909	1	1	1	1	1	1	1	1	1	1	1	1	1	1	1	1	1.13636	1	1	1	1	1	1	4	4	4	12	6	18	1	1	1	1	1	1	4	4	4	12	6	18
141	2021-12-02	Senior Two	female	17	6-8h/d	Specialties	Undergraduate	1.18182	4	1	2	1	1	2	2	1.85714	4	4	4	4	4	4	4	4	2.34632	1	1	1	1	1	1	4	3	4	11	6	17	3	3	3	2	3	3	4	4	4	12	17	29
142	2021-12-02	Senior Two	female	16	6-8h/d	High school and blow	High school and blow	1.13636	2	1	1	1	1	3	1	1.42857	1	1	1	1	1	1	1	1	1.18831	4	4	3	3	3	1	2	2	2	6	18	24	4	4	3	3	3	1	2	2	2	6	18	24
143	2021-12-02	Senior Two	male	16	6-8h/d	Undergraduate	Specialties	1.68182	5	3	1	2	1	5	3	2.85714	1	1	1	1	1	2	2	1.28571	1.94156	2	2	2	2	2	2	3	3	3	9	12	21	2	2	2	2	2	2	3	3	3	9	12	21
144	2021-12-02	Senior Two	male	15	6-8h/d	Specialties	Specialties	1.40909	5	2	3	4	3	3	2	3.14286	4	3	2	4	3	3	4	3.28571	2.61255	3	3	3	3	4	3	2	2	1	5	19	24	4	3	4	3	4	3	1	2	1	4	21	25
145	2021-12-02	Senior Two	female	16	6-8h/d	High school and blow	High school and blow	1.22727	4	1	2	1	1	3	2	2	1	3	2	2	3	4	1	2.28571	1.83766	3	3	3	3	3	2	3	3	3	9	17	26	4	3	3	2	2	2	2	3	3	8	16	24
146	2021-12-02	Senior Two	female	16	6-8h/d	Specialties	Specialties	1.77273	3	1	2	2	1	2	2	1.85714	1	1	1	1	1	2	2	1.28571	1.63853	4	3	3	2	3	4	3	3	4	10	19	29	1	1	1	1	3	3	3	3	4	10	10	20
147	2021-12-02	Senior Two	male	16	6-8h/d	Specialties	Specialties	1.36364	5	3	2	2	3	3	3	3	1	1	1	1	3	3	3	1.85714	2.07359	3	3	3	3	3	3	2	2	2	6	18	24	3	3	3	3	1	1	4	4	4	12	14	26
148	2021-12-02	Senior Two	male	16	6-8h/d	High school and blow	High school and blow	1.09091	3	1	1	2	2	2	2	1.85714	1	1	1	1	1	2	2	1.28571	1.41126	2	2	3	2	2	3	3	3	3	9	14	23	3	2	2	2	2	2	3	3	3	9	13	22
149	2021-12-02	Senior Two	male	17	6-8h/d	Specialties	Specialties	1.45455	5	2	1	3	3	3	2	2.71429	4	4	4	4	4	4	4	4	2.72294	3	3	3	3	3	3	3	3	3	9	18	27	3	3	3	3	3	3	2	2	2	6	18	24
150	2021-12-02	Senior Two	female	16	6-8h/d	Undergraduate	Specialties	1.27273	4	1	2	2	1	3	2	2.14286	2	2	2	2	2	1	1	1.71429	1.70996	3	3	3	2	2	3	4	4	4	12	16	28	3	3	2	2	2	2	2	2	2	6	14	20
151	2021-12-02	Senior Two	male	16	6-8h/d	High school and blow	High school and blow	1.36364	5	2	2	1	1	4	2	2.42857	2	3	2	2	3	2	2	2.28571	2.02597	3	3	3	2	3	3	3	3	3	9	17	26	3	3	3	2	3	3	3	3	3	9	17	26
152	2021-12-02	Senior Two	female	16	6-8h/d	High school and blow	High school and blow	1.72727	4	1	2	1	2	3	2	2.14286	1	1	2	1	2	3	3	1.85714	1.90909	3	4	3	2	2	2	4	4	4	12	16	28	3	3	3	2	2	4	4	4	4	12	17	29
153	2021-12-02	Senior Two	male	16	＜6h/d	High school and blow	High school and blow	1.68182	5	1	2	5	5	5	5	4	4	4	4	4	4	4	4	4	3.22727	3	2	2	2	2	3	3	3	3	9	14	23	2	2	2	2	2	2	4	4	4	12	12	24
154	2021-12-02	Senior Two	male	17	6-8h/d	High school and blow	High school and blow	1.22727	3	1	3	1	1	5	2	2.28571	1	1	1	1	1	2	2	1.28571	1.59957	4	4	3	1	1	1	4	4	4	12	14	26	2	2	2	1	1	1	4	4	4	12	9	21
155	2021-12-02	Senior Two	female	16	6-8h/d	Undergraduate	High school and blow	1.18182	3	1	2	1	1	2	2	1.71429	1	1	1	1	1	1	1	1	1.2987	3	2	3	3	2	3	2	2	3	7	16	23	2	2	2	3	2	2	2	2	2	6	13	19
156	2021-12-02	Senior Two	female	17	6-8h/d	Specialties	High school and blow	1.31818	3	1	2	2	1	3	2	2	1	1	1	1	1	2	2	1.28571	1.53463	4	4	3	3	3	2	3	3	3	9	19	28	4	4	3	3	3	2	3	3	3	9	19	28
157	2021-12-02	Senior Two	male	16	6-8h/d	High school and blow	High school and blow	1.18182	5	5	5	5	5	5	3	4.71429	5	5	5	5	5	2	2	4.14286	3.34632	1	1	1	3	3	3	3	4	2	9	12	21	1	1	1	3	3	3	3	4	2	9	12	21
158	2021-12-02	Senior Two	male	17	6-8h/d	High school and blow	High school and blow	1.36364	5	2	4	3	5	5	3	3.85714	5	5	5	5	5	1	1	3.85714	3.02597	3	4	4	4	4	4	4	4	4	12	23	35	4	4	4	4	4	4	4	4	4	12	24	36
159	2021-12-02	Senior Two	male	16	6-8h/d	High school and blow	High school and blow	1.54545	5	2	2	5	1	3	2	2.85714	5	2	2	2	5	2	4	3.14286	2.51515	3	3	3	3	3	3	2	2	2	6	18	24	3	3	3	3	3	3	2	2	2	6	18	24
160	2021-12-02	Senior Two	female	17	6-8h/d	High school and blow	High school and blow	1.54545	5	2	2	1	1	2	2	2.14286	1	2	1	1	2	2	2	1.57143	1.75325	2	2	2	2	2	3	3	3	3	9	13	22	2	3	3	2	2	3	3	3	3	9	15	24
161	2021-12-02	Senior Two	female	17	6-8h/d	High school and blow	High school and blow	1.36364	4	1	1	1	1	2	2	1.71429	1	1	1	1	1	1	1	1	1.35931	3	3	3	3	3	3	2	2	2	6	18	24	3	3	3	3	3	3	2	2	2	6	18	24
162	2021-12-02	Senior Two	male	17	6-8h/d	Specialties	Specialties	1.18182	4	3	3	1	1	1	2	2.14286	2	1	1	1	2	1	1	1.28571	1.5368	3	3	3	3	3	3	2	2	2	6	18	24	3	3	3	3	3	3	2	2	2	6	18	24
163	2021-12-02	Senior Two	female	17	6-8h/d	Specialties	Specialties	1.04545	3	1	2	1	2	3	2	2	1	1	1	1	1	2	2	1.28571	1.44372	3	3	3	3	3	3	4	4	4	12	18	30	4	2	3	2	3	2	4	4	4	12	16	28
164	2021-12-02	Senior Two	female	16	6-8h/d	High school and blow	High school and blow	1.31818	5	1	4	1	1	3	3	2.57143	2	2	2	2	2	2	2	2	1.9632	3	3	3	2	2	2	3	3	3	9	15	24	3	2	3	2	2	2	3	3	3	9	14	23
165	2021-12-02	Senior Two	male	16	6-8h/d	High school and blow	High school and blow	1.45455	3	5	5	3	1	1	2	2.85714	1	2	2	1	3	3	1	1.85714	2.05628	3	1	2	2	2	2	2	3	3	8	12	20	3	2	2	2	2	2	3	3	3	9	13	22
166	2021-12-02	Senior Two	male	16	6-8h/d	High school and blow	High school and blow	1.09091	5	1	1	1	1	2	2	1.85714	1	1	1	1	1	2	1	1.14286	1.36364	3	3	3	3	3	3	2	2	2	6	18	24	3	3	3	3	3	3	3	3	3	9	18	27
167	2021-12-02	Senior Two	female	17	＜6h/d	High school and blow	High school and blow	1.22727	4	1	1	1	1	1	1	1.42857	1	1	1	1	1	1	1	1	1.21861	2	2	2	2	2	2	2	3	3	8	12	20	2	3	3	2	2	2	3	3	3	9	14	23
168	2021-12-02	Senior Two	male	17	6-8h/d	Specialties	Specialties	1.54545	3	1	2	1	1	5	2	2.14286	1	2	1	1	2	1	1	1.28571	1.65801	3	2	3	3	3	2	2	3	3	8	16	24	3	3	3	2	2	2	3	3	3	9	15	24
169	2021-12-02	Senior Two	female	17	6-8h/d	High school and blow	High school and blow	1.22727	4	1	1	3	2	3	2	2.28571	3	3	3	3	3	3	3	3	2.171	3	3	3	3	3	3	3	3	3	9	18	27	3	3	3	3	3	3	3	3	3	9	18	27
170	2021-12-02	Senior Two	male	16	＜6h/d	High school and blow	High school and blow	1.18182	4	1	1	1	1	4	2	2	1	5	1	1	5	2	2	2.42857	1.87013	3	2	3	3	3	3	3	3	3	9	17	26	4	3	3	2	2	2	3	3	3	9	16	25
171	2021-12-02	Senior Two	female	16	6-8h/d	Undergraduate	Undergraduate	1.27273	4	1	3	1	1	3	1	2	2	3	2	2	3	1	1	2	1.75758	2	2	4	4	4	2	3	4	4	11	18	29	4	3	2	3	3	1	2	2	2	6	16	22
172	2021-12-02	Senior Two	female	16	＜6h/d	Undergraduate	Postgraduate and above	1.22727	4	2	2	3	5	5	4	3.57143	3	3	3	3	3	3	3	3	2.59957	4	4	4	4	4	3	3	3	3	9	23	32	4	4	4	4	4	4	2	3	3	8	24	32
173	2021-12-02	Senior Two	male	16	＜6h/d	High school and blow	High school and blow	1	2	1	1	1	1	1	1	1.14286	1	1	1	1	1	1	1	1	1.04762	4	2	2	2	2	2	1	1	1	3	14	17	2	2	2	2	2	2	3	3	3	9	12	21
174	2021-12-02	Senior Two	female	17	6-8h/d	High school and blow	High school and blow	1.45455	3	1	1	1	1	3	1	1.57143	1	3	1	1	3	2	2	1.85714	1.62771	3	3	3	2	2	3	3	4	4	11	16	27	3	3	3	2	2	3	3	4	4	11	16	27
175	2021-12-02	Senior Two	male	15	6-8h/d	Undergraduate	Specialties	1.27273	3	1	2	1	2	2	2	1.85714	1	2	1	1	2	1	1	1.28571	1.47186	2	3	3	2	2	3	3	3	3	9	15	24	2	3	3	2	2	3	3	3	3	9	15	24
176	2021-12-02	Senior Two	male	16	6-8h/d	High school and blow	High school and blow	1.63636	5	5	5	5	5	5	4	4.85714	4	4	4	4	4	4	4	4	3.49784	3	3	3	3	3	3	2	2	2	6	18	24	3	3	3	3	3	3	2	2	2	6	18	24
177	2021-12-02	Senior Two	male	16	8-10h/d	Specialties	High school and blow	2	4	1	1	3	2	2	2	2.14286	2	3	1	4	2	5	3	2.85714	2.33333	4	4	3	4	3	4	1	1	1	3	22	25	4	4	3	3	3	4	1	1	1	3	21	24
178	2021-12-02	Senior Two	female	16	＜6h/d	Undergraduate	Specialties	1.09091	3	1	1	1	1	1	1	1.28571	1	1	1	1	1	1	1	1	1.12554	1	1	1	1	1	1	4	4	4	12	6	18	3	1	1	3	1	1	4	4	4	12	10	22
179	2021-12-02	Senior Two	female	16	8-10h/d	Undergraduate	Specialties	1.36364	4	1	1	2	2	4	2	2.28571	1	1	1	1	1	2	2	1.28571	1.64502	4	3	3	2	3	4	3	3	4	10	19	29	1	1	1	1	3	3	3	3	4	10	10	20
180	2021-12-02	Senior Two	female	16	＜6h/d	Specialties	Specialties	1.18182	5	1	1	1	1	2	2	1.85714	2	1	1	1	1	1	1	1.14286	1.39394	3	3	3	3	3	3	3	3	3	9	18	27	3	2	2	3	2	2	3	3	3	9	14	23
181	2021-12-02	Senior Two	female	16	＜6h/d	Specialties	Specialties	1.22727	1	1	1	1	1	1	1	1	1	1	1	1	1	1	1	1	1.07576	2	2	2	3	2	2	3	3	3	9	13	22	3	2	2	3	2	2	3	3	3	9	14	23
182	2021-12-02	Senior Two	male	16	8-10h/d	Specialties	Specialties	1.18182	3	2	2	1	1	3	2	2	1	2	1	1	2	1	1	1.28571	1.48918	3	3	3	3	3	3	3	3	3	9	18	27	2	2	2	3	3	3	3	3	3	9	15	24
183	2021-12-02	Senior Two	male	15	6-8h/d	High school and blow	High school and blow	1.18182	5	1	1	1	1	3	2	2	4	2	2	1	4	2	3	2.57143	1.91775	3	4	3	3	3	3	4	4	4	12	19	31	3	3	3	3	3	3	4	4	4	12	18	30
184	2021-12-02	Second Year	male	13	8-10h/d	Specialties	Specialties	1.36364	5	2	2	3	1	3	3	2.71429	2	2	2	2	2	2	2	2	2.02597	2	2	2	3	4	2	4	3	2	9	15	24	2	2	2	4	2	2	2	2	2	6	14	20
185	2021-12-02	Second Year	male	13	6-8h/d	Specialties	Specialties	2.13636	4	2	3	5	5	2	3	3.42857	4	3	4	3	4	3	4	3.57143	3.04545	3	3	3	3	3	3	2	2	2	6	18	24	3	3	3	3	3	3	2	2	2	6	18	24
186	2021-12-01	Second Year	male	13	8-10h/d	Specialties	Specialties	1.5	3	2	2	1	3	3	3	2.42857	4	4	4	4	4	4	2	3.71429	2.54762	3	3	3	3	4	3	3	3	3	9	19	28	3	2	2	2	4	2	2	2	3	7	15	22
187	2021-12-01	Second Year	male	13	8-10h/d	Specialties	Specialties	1.22727	4	1	2	1	3	1	5	2.42857	2	2	2	2	2	2	1	1.85714	1.83766	3	3	3	3	3	3	2	2	2	6	18	24	3	3	3	2	2	2	2	2	2	6	15	21
188	2021-12-01	Second Year	male	13	6-8h/d	High school and blow	High school and blow	1.18182	3	2	2	1	1	3	2	2	1	2	1	2	2	1	2	1.57143	1.58442	4	2	2	2	2	2	3	3	1	7	14	21	3	3	3	3	3	3	3	3	3	9	18	27
189	2021-12-01	Second Year	male	13	6-8h/d	Specialties	Specialties	3.90909	5	5	5	5	1	5	5	4.42857	5	5	5	5	5	5	5	5	4.44589	4	4	4	4	3	4	1	1	1	3	23	26	4	4	3	3	4	4	1	1	1	3	22	25
190	2021-12-01	Second Year	male	12	8-10h/d	Specialties	Specialties	1.40909	5	1	1	5	4	5	5	3.71429	4	4	4	4	4	4	4	4	3.04113	3	2	2	2	2	2	3	3	3	9	13	22	2	2	2	2	3	2	3	3	3	9	13	22
191	2021-12-01	Second Year	male	13	6-8h/d	Specialties	Specialties	1.18182	5	3	2	3	1	4	3	3	4	4	4	4	4	4	4	4	2.72727	3	2	2	2	2	2	3	3	3	9	13	22	2	2	2	2	2	2	3	3	3	9	12	21
192	2021-12-02	Second Year	male	13	6-8h/d	High school and blow	High school and blow	1.59091	4	1	1	1	1	1	4	1.85714	3	3	3	3	3	4	4	3.28571	2.24459	3	3	3	3	3	3	2	2	2	6	18	24	2	3	2	3	2	3	3	2	2	7	15	22
193	2021-12-01	Second Year	female	13	8-10h/d	High school and blow	High school and blow	1	3	1	1	1	1	1	1	1.28571	2	1	2	2	2	2	2	1.85714	1.38095	2	3	2	2	3	3	2	2	2	6	15	21	2	3	3	3	3	2	4	3	4	11	16	27
194	2021-12-01	Second Year	male	13	6-8h/d	Specialties	Specialties	1.31818	4	3	5	5	4	4	1	3.71429	2	2	2	2	4	1	1	2	2.34416	3	3	2	2	3	2	4	3	3	10	15	25	2	3	3	3	4	2	3	3	3	9	17	26
195	2021-12-01	Second Year	female	13	6-8h/d	Specialties	Specialties	1.54545	4	1	1	1	2	3	3	2.14286	1	2	1	2	2	2	2	1.71429	1.80087	4	2	4	2	4	3	4	4	4	12	19	31	2	2	3	4	4	1	4	3	4	11	16	27
196	2021-12-01	Second Year	female	13	8-10h/d	Specialties	Specialties	1.31818	3	1	3	1	2	1	2	1.85714	2	3	3	3	3	3	1	2.57143	1.91558	3	3	3	3	3	3	3	3	3	9	18	27	3	3	3	3	3	3	3	3	3	9	18	27
197	2021-12-01	Second Year	male	13	8-10h/d	Specialties	Specialties	1.36364	5	2	3	3	1	3	5	3.14286	3	3	3	3	3	1	1	2.42857	2.31169	2	2	2	2	2	2	3	3	3	9	12	21	3	3	3	3	3	3	2	2	2	6	18	24
198	2021-12-01	Second Year	male	13	6-8h/d	High school and blow	High school and blow	1.22727	4	3	3	3	1	3	2	2.71429	4	3	4	3	4	3	4	3.57143	2.50433	3	2	2	4	2	3	4	2	3	9	16	25	1	2	3	4	2	1	3	2	4	9	13	22
199	2021-12-01	Second Year	female	13	6-8h/d	High school and blow	High school and blow	1.77273	5	3	3	1	1	1	2	2.28571	2	3	1	1	3	2	1	1.85714	1.97186	3	3	3	3	3	3	3	4	3	10	18	28	2	4	2	3	3	2	4	2	2	8	16	24
200	2021-12-01	Second Year	male	13	8-10h/d	High school and blow	High school and blow	1.04545	5	1	1	1	1	3	3	2.14286	1	1	1	1	1	2	2	1.28571	1.49134	3	3	3	3	3	3	3	3	3	9	18	27	3	3	3	3	3	3	3	3	3	9	18	27
201	2021-12-01	Second Year	female	12	8-10h/d	High school and blow	High school and blow	1.18182	3	3	1	1	2	1	2	1.85714	1	1	1	1	1	1	1	1	1.34632	3	3	3	3	3	3	3	3	3	9	18	27	3	3	3	3	3	3	3	3	3	9	18	27
202	2021-12-01	Second Year	male	13	8-10h/d	Specialties	Specialties	2	4	3	5	5	4	5	4	4.28571	5	5	5	5	5	4	3	4.57143	3.61905	3	3	3	3	3	3	2	2	2	6	18	24	2	2	2	2	2	2	3	3	3	9	12	21
203	2021-12-01	Second Year	male	13	8-10h/d	Specialties	Specialties	1.95455	3	2	2	1	1	3	2	2	2	4	2	4	4	3	2	3	2.31818	3	3	3	2	2	3	4	3	3	10	16	26	2	2	2	2	2	2	3	3	3	9	12	21
204	2021-12-01	Second Year	male	12	6-8h/d	High school and blow	High school and blow	1.54545	4	2	3	3	1	3	2	2.57143	2	2	2	2	2	1	3	2	2.03896	3	3	3	3	3	3	3	3	3	9	18	27	2	3	2	2	2	3	3	3	3	9	14	23
205	2021-12-01	Second Year	male	13	6-8h/d	Specialties	Specialties	1.27273	3	2	3	1	1	4	3	2.42857	3	3	3	3	3	3	3	3	2.23377	3	2	2	2	2	3	3	3	2	8	14	22	2	2	2	2	3	3	3	3	2	8	14	22
206	2021-12-01	Second Year	male	13	6-8h/d	Specialties	Specialties	1.77273	4	4	4	2	2	2	3	3	3	3	3	3	4	4	4	3.42857	2.73377	4	3	3	3	2	1	4	4	4	12	16	28	3	3	3	3	3	1	4	4	4	12	16	28
207	2021-12-01	Second Year	male	13	6-8h/d	Specialties	Specialties	1.27273	5	5	5	5	5	5	3	4.71429	5	5	5	5	5	3	3	4.42857	3.47186	3	3	3	3	3	3	2	2	2	6	18	24	3	3	3	3	3	3	2	2	2	6	18	24
208	2021-12-01	Second Year	male	12	8-10h/d	High school and blow	High school and blow	1.04545	5	5	5	3	3	3	2	3.71429	4	4	4	4	4	4	4	4	2.91991	3	3	3	3	3	3	2	2	2	6	18	24	3	3	3	3	3	3	2	2	2	6	18	24
209	2021-12-01	Second Year	female	13	6-8h/d	High school and blow	High school and blow	1.63636	5	2	2	1	3	3	2	2.57143	2	2	2	2	2	3	3	2.28571	2.1645	3	3	3	3	3	3	3	3	3	9	18	27	3	3	3	3	3	3	3	3	3	9	18	27
210	2021-12-01	Second Year	male	13	6-8h/d	Specialties	Specialties	1.45455	4	3	3	1	1	3	3	2.57143	2	2	2	2	2	1	1	1.71429	1.91342	3	2	2	2	2	2	2	2	3	7	13	20	3	2	2	2	2	2	3	2	3	8	13	21
211	2021-12-01	Second Year	male	12	8-10h/d	High school and blow	Specialties	1.13636	3	3	1	3	2	2	3	2.42857	2	2	2	2	2	2	2	2	1.85498	3	3	3	4	3	4	3	2	3	8	20	28	3	3	4	4	4	4	2	3	4	9	22	31
212	2021-12-01	Second Year	male	13	6-8h/d	Specialties	Specialties	1.5	4	1	3	1	1	5	2	2.42857	2	2	3	2	3	2	2	2.28571	2.07143	1	1	1	1	3	2	4	4	4	12	9	21	1	1	1	1	1	1	4	4	4	12	6	18
213	2021-12-01	Second Year	female	13	6-8h/d	Specialties	Specialties	1.31818	3	1	2	1	1	4	2	2	1	3	1	3	3	1	1	1.85714	1.72511	3	3	3	3	2	2	2	2	2	6	16	22	3	3	3	3	3	3	3	3	3	9	18	27
214	2021-12-01	Second Year	male	13	8-10h/d	High school and blow	High school and blow	1.68182	5	5	5	3	5	3	4	4.28571	5	5	5	5	5	5	5	5	3.65584	3	1	1	1	1	1	4	4	4	12	8	20	1	4	1	1	1	1	4	4	4	12	9	21
215	2021-12-01	Second Year	male	13	6-8h/d	Specialties	Specialties	1.22727	4	1	2	1	1	1	3	1.85714	3	3	3	3	3	1	1	2.42857	1.83766	2	2	2	2	2	2	4	3	3	10	12	22	2	2	2	2	2	2	3	3	3	9	12	21
216	2021-12-01	Second Year	male	13	6-8h/d	Specialties	Specialties	1.5	5	3	2	3	2	3	5	3.28571	2	2	2	2	2	2	5	2.42857	2.40476	2	2	2	2	2	2	3	3	3	9	12	21	2	2	2	2	2	2	3	3	3	9	12	21
217	2021-12-01	Second Year	male	13	8-10h/d	Specialties	Specialties	2.40909	5	4	4	4	1	5	4	3.85714	5	5	5	5	5	2	2	4.14286	3.4697	2	1	1	1	1	1	3	3	4	10	7	17	1	1	1	1	1	1	4	4	4	12	6	18
218	2021-12-01	Second Year	male	13	6-8h/d	High school and blow	High school and blow	1.40909	5	2	1	1	1	1	2	1.85714	1	1	1	2	1	1	1	1.14286	1.4697	4	4	4	2	4	2	3	3	3	9	20	29	4	4	3	2	2	4	3	3	3	9	19	28
219	2021-12-01	Second Year	male	12	6-8h/d	High school and blow	High school and blow	2.09091	5	1	3	3	2	2	4	2.85714	2	5	2	5	2	3	2	3	2.64935	3	3	3	3	3	3	2	2	2	6	18	24	3	3	3	3	3	3	3	3	3	9	18	27
220	2021-12-01	Second Year	female	13	6-8h/d	High school and blow	Specialties	1.5	4	3	5	5	4	4	1	3.71429	4	4	4	4	4	1	1	3.14286	2.78571	1	3	2	2	3	2	4	3	3	10	13	23	2	4	3	4	4	2	4	4	4	12	19	31
221	2021-12-01	Second Year	female	13	6-8h/d	Specialties	Specialties	1.22727	1	3	1	1	1	1	1	1.28571	2	2	2	2	2	5	5	2.85714	1.79004	3	2	3	1	1	1	3	3	3	9	11	20	3	2	3	1	1	1	3	3	3	9	11	20
222	2021-12-01	Second Year	female	13	8-10h/d	Specialties	Specialties	1.5	4	4	4	2	1	5	3	3.28571	2	3	2	3	4	3	3	2.85714	2.54762	3	3	2	2	3	2	3	3	3	9	15	24	3	3	3	2	3	2	2	2	2	6	16	22
223	2021-12-01	Second Year	female	13	6-8h/d	Specialties	Specialties	1.04545	4	2	1	1	1	1	1	1.57143	1	1	2	1	1	3	1	1.42857	1.34848	3	3	2	2	3	2	3	3	3	9	15	24	3	3	2	2	2	2	3	3	2	8	14	22
224	2021-12-01	Second Year	female	13	6-8h/d	High school and blow	High school and blow	1.36364	3	2	2	1	1	1	2	1.71429	5	5	5	5	5	5	5	5	2.69264	2	3	2	2	2	3	2	3	3	8	14	22	2	2	2	2	2	2	3	3	3	9	12	21
225	2021-12-01	Second Year	male	13	8-10h/d	Specialties	Specialties	1.63636	5	1	5	4	4	5	5	4.14286	5	5	5	5	5	2	1	4	3.25974	2	2	2	2	2	2	4	4	4	12	12	24	2	2	2	2	2	2	4	4	4	12	12	24
226	2021-12-01	Second Year	female	12	8-10h/d	Specialties	Specialties	1.18182	4	2	3	1	1	3	2	2.28571	2	2	2	2	2	2	1	1.85714	1.77489	3	2	3	2	2	2	3	3	3	9	14	23	3	3	3	2	2	2	3	3	3	9	15	24
227	2021-12-01	Second Year	female	13	6-8h/d	High school and blow	High school and blow	4.09091	5	5	5	5	5	5	1	4.42857	1	5	5	5	5	5	5	4.42857	4.31602	4	4	4	4	4	4	1	1	1	3	24	27	4	4	4	4	4	4	1	1	1	3	24	27
228	2021-12-01	Second Year	male	13	8-10h/d	High school and blow	High school and blow	1.36364	5	2	2	2	1	3	2	2.42857	2	2	2	2	3	4	3	2.57143	2.12121	4	4	4	2	3	2	3	3	2	8	19	27	3	3	3	3	3	3	3	3	3	9	18	27
229	2021-12-01	Second Year	female	13	6-8h/d	Specialties	Specialties	1.36364	5	4	5	1	1	4	4	3.42857	4	4	4	4	4	5	5	4.28571	3.02597	2	2	2	4	4	4	3	3	3	9	18	27	2	3	3	4	4	4	3	3	3	9	20	29
230	2021-12-01	Second Year	female	13	6-8h/d	Specialties	Specialties	1.59091	4	2	3	3	4	4	2	3.14286	2	1	2	2	1	3	3	2	2.24459	3	3	3	2	3	1	3	3	3	9	15	24	3	3	3	2	3	1	3	3	3	9	15	24
231	2021-12-01	First Year	female	12	6-8h/d	High school and blow	High school and blow	1.27273	5	2	2	2	1	4	2	2.57143	2	2	1	2	1	2	2	1.71429	1.85281	3	3	3	3	3	3	4	4	4	12	18	30	3	3	3	3	3	3	4	4	4	12	18	30
232	2021-12-01	First Year	female	13	6-8h/d	High school and blow	High school and blow	1.13636	5	4	2	1	1	3	2	2.57143	1	1	2	2	1	2	2	1.57143	1.75974	3	2	2	2	2	3	2	2	2	6	14	20	2	2	2	2	2	3	2	2	2	6	13	19
233	2021-12-01	First Year	male	13	8-10h/d	High school and blow	High school and blow	1.95455	5	3	4	3	3	4	3	3.57143	4	3	4	3	4	5	5	4	3.17532	4	3	3	2	3	3	2	2	2	6	18	24	4	3	3	2	3	3	2	2	2	6	18	24
234	2021-12-01	First Year	male	13	6-8h/d	Undergraduate	Specialties	1.36364	3	2	2	1	1	1	2	1.71429	2	1	1	1	1	1	1	1.14286	1.40693	4	3	3	3	3	3	3	3	3	9	19	28	3	3	3	3	3	3	3	3	3	9	18	27
235	2021-12-01	First Year	male	12	6-8h/d	High school and blow	High school and blow	1.22727	5	1	1	3	2	4	1	2.42857	1	1	1	1	1	1	1	1	1.55195	1	1	1	1	1	1	4	4	4	12	6	18	1	1	1	1	1	1	4	4	4	12	6	18
236	2021-12-01	First Year	female	13	8-10h/d	High school and blow	Postgraduate and above	1.36364	4	1	1	1	1	5	4	2.42857	3	3	2	1	4	5	5	3.28571	2.35931	3	3	3	3	2	3	4	4	4	12	17	29	3	3	3	1	1	2	4	4	4	12	13	25
237	2021-12-01	First Year	female	12	8-10h/d	High school and blow	Specialties	1.31818	1	2	5	2	1	3	3	2.42857	3	3	3	1	3	3	3	2.71429	2.15368	1	2	2	1	2	2	1	1	3	5	10	15	2	2	2	2	2	2	2	2	3	7	12	19
238	2021-12-01	First Year	male	13	8-10h/d	High school and blow	High school and blow	1.5	3	2	1	3	4	4	4	3	3	3	3	3	3	4	4	3.28571	2.59524	3	3	3	2	2	3	3	3	3	9	16	25	2	2	3	3	2	3	3	3	3	9	15	24
239	2021-12-01	First Year	male	13	8-10h/d	Specialties	Specialties	1.54545	3	1	4	1	1	1	1	1.71429	1	1	1	1	1	1	1	1	1.41991	3	3	3	3	2	3	3	3	3	9	17	26	2	2	3	3	2	2	3	3	3	9	14	23
240	2021-12-01	First Year	male	13	8-10h/d	High school and blow	High school and blow	1.5	4	1	1	1	1	3	2	1.85714	1	2	3	1	2	2	1	1.71429	1.69048	4	4	3	2	2	2	4	4	4	12	17	29	4	4	3	2	2	2	4	4	4	12	17	29
241	2021-12-01	First Year	female	12	8-10h/d	High school and blow	High school and blow	1.18182	3	2	2	1	1	1	2	1.71429	1	1	1	1	1	2	2	1.28571	1.39394	2	1	1	1	3	1	3	3	3	9	9	18	2	3	2	1	1	4	4	4	3	11	13	24
242	2021-12-01	First Year	male	13	6-8h/d	Specialties	Specialties	1.68182	4	2	1	3	3	2	2	2.42857	1	1	1	2	3	3	4	2.14286	2.08442	1	1	1	1	1	1	4	4	4	12	6	18	1	1	1	1	1	1	4	4	4	12	6	18
243	2021-12-01	First Year	male	12	6-8h/d	High school and blow	High school and blow	1.31818	4	1	1	2	3	4	2	2.42857	3	2	2	1	3	3	3	2.42857	2.05844	3	3	3	3	3	3	4	4	4	12	18	30	3	3	3	3	3	3	4	4	4	12	18	30
244	2021-12-01	First Year	female	12	6-8h/d	High school and blow	Undergraduate	1.36364	3	3	3	1	1	1	2	2	2	1	2	2	2	1	2	1.71429	1.69264	2	3	3	2	2	2	3	3	3	9	14	23	2	2	2	2	2	2	3	3	3	9	12	21
245	2021-12-01	First Year	female	12	8-10h/d	High school and blow	High school and blow	1.5	5	1	1	1	2	3	2	2.14286	1	1	1	1	1	5	5	2.14286	1.92857	3	3	3	1	1	3	4	4	4	12	14	26	3	3	3	3	3	1	4	4	4	12	16	28
246	2021-12-01	First Year	female	14	6-8h/d	High school and blow	High school and blow	1.45455	4	3	3	3	1	1	2	2.42857	4	4	4	4	4	5	5	4.28571	2.72294	3	4	4	4	4	4	1	1	1	3	23	26	4	4	4	4	4	4	1	1	1	3	24	27
247	2021-12-01	First Year	female	12	8-10h/d	Specialties	Specialties	1.40909	4	1	1	1	1	5	4	2.42857	3	3	2	1	4	5	5	3.28571	2.37446	3	3	3	3	3	3	3	3	3	9	18	27	3	3	3	3	3	3	3	3	3	9	18	27
248	2021-12-01	First Year	male	12	6-8h/d	High school and blow	High school and blow	1.36364	5	5	5	1	1	5	2	3.42857	1	1	1	1	1	1	1	1	1.93074	2	2	2	1	1	4	4	4	4	12	12	24	2	2	2	2	2	4	4	4	4	12	14	26
249	2021-12-01	First Year	female	13	6-8h/d	High school and blow	High school and blow	1.68182	4	3	3	1	1	1	2	2.14286	2	3	3	3	3	4	3	3	2.27489	3	3	4	4	4	3	3	2	3	8	21	29	3	3	3	3	3	3	3	3	3	9	18	27
250	2021-12-01	First Year	female	13	6-8h/d	High school and blow	Specialties	1.09091	3	2	3	1	1	4	2	2.28571	4	4	2	4	3	3	1	3	2.12554	1	3	4	3	2	3	3	3	4	10	16	26	2	3	2	2	2	3	4	4	4	12	14	26
251	2021-12-01	First Year	female	12	6-8h/d	Specialties	Specialties	1.31818	5	2	4	2	1	3	2	2.71429	2	2	1	2	1	3	3	2	2.01082	4	4	3	3	2	2	3	3	4	10	18	28	3	3	3	3	3	3	3	3	3	9	18	27
252	2021-12-01	First Year	female	12	6-8h/d	High school and blow	High school and blow	1.5	5	4	1	3	2	5	4	3.42857	2	3	4	4	4	4	4	3.57143	2.83333	4	4	4	3	3	4	4	4	4	12	22	34	4	4	4	3	3	4	4	4	4	12	22	34
253	2021-12-01	First Year	female	13	6-8h/d	High school and blow	High school and blow	1.31818	5	3	1	1	1	1	1	1.85714	3	2	3	2	3	1	1	2.14286	1.77273	2	2	2	2	2	2	3	3	3	9	12	21	3	2	2	2	2	2	3	3	3	9	13	22
254	2021-12-01	First Year	female	13	6-8h/d	High school and blow	High school and blow	1.22727	4	3	3	1	1	2	1	2.14286	2	2	2	2	2	2	2	2	1.79004	3	3	3	3	3	3	4	4	4	12	18	30	3	3	3	3	3	3	4	4	4	12	18	30
255	2021-12-01	First Year	male	13	6-8h/d	High school and blow	High school and blow	1.68182	4	4	2	5	5	5	3	4	4	4	4	4	3	5	5	4.14286	3.27489	4	4	3	3	2	4	1	4	4	9	20	29	2	2	4	2	2	3	3	4	4	11	15	26
256	2021-12-01	First Year	male	13	6-8h/d	High school and blow	High school and blow	1.68182	4	2	2	3	3	3	2	2.71429	2	2	2	1	1	1	1	1.42857	1.94156	3	3	3	3	3	3	2	2	2	6	18	24	3	3	3	3	3	3	2	2	2	6	18	24
257	2021-12-01	First Year	female	13	8-10h/d	Specialties	Specialties	1.59091	5	3	1	1	5	3	3	3	1	1	1	1	1	2	2	1.28571	1.95887	1	1	1	1	1	1	3	3	3	9	6	15	1	1	1	1	1	1	3	3	3	9	6	15
258	2021-12-01	First Year	female	12	＞10h/d	High school and blow	High school and blow	1.36364	3	1	1	2	1	2	1	1.57143	3	3	1	3	1	1	1	1.85714	1.5974	3	2	1	1	1	1	4	3	4	11	9	20	3	2	3	2	2	3	3	3	3	9	15	24
259	2021-12-01	First Year	female	13	6-8h/d	High school and blow	Specialties	1.09091	4	1	1	1	1	1	1	1.42857	1	1	1	1	1	1	1	1	1.17316	4	4	4	2	1	4	1	1	1	3	19	22	4	4	4	4	4	4	3	2	2	7	24	31
260	2021-12-01	First Year	male	13	6-8h/d	High school and blow	High school and blow	1.95455	5	1	5	2	1	4	2	2.85714	2	2	2	2	2	2	2	2	2.27056	2	3	1	2	2	4	4	4	4	12	14	26	4	4	3	2	2	3	4	4	4	12	18	30
261	2021-12-01	First Year	male	13	6-8h/d	Undergraduate	Undergraduate	1.59091	5	5	1	1	5	5	5	3.85714	1	1	2	3	5	5	5	3.14286	2.86364	4	4	4	4	4	4	2	2	2	6	24	30	3	3	3	3	3	3	2	2	2	6	18	24
262	2021-12-01	First Year	female	12	8-10h/d	High school and blow	High school and blow	2.13636	4	1	1	3	2	3	3	2.42857	2	1	2	1	2	2	2	1.71429	2.09307	3	3	3	3	3	3	3	3	3	9	18	27	3	3	3	3	3	3	3	3	3	9	18	27
263	2021-12-01	First Year	female	12	6-8h/d	Specialties	Specialties	2.27273	4	1	1	1	1	1	2	1.57143	1	1	2	4	3	5	2	2.57143	2.13853	3	2	1	2	3	2	4	2	1	7	13	20	2	4	2	2	3	2	3	1	2	6	15	21
264	2021-12-01	First Year	male	12	6-8h/d	High school and blow	High school and blow	1.68182	3	1	1	1	1	1	2	1.42857	2	2	1	1	1	1	1	1.28571	1.46537	1	3	3	3	2	3	3	3	3	9	15	24	3	3	3	2	2	3	3	3	3	9	16	25
265	2021-12-01	First Year	female	12	8-10h/d	Specialties	Specialties	1.72727	3	1	1	1	1	1	2	1.42857	4	4	4	4	4	4	4	4	2.38528	4	4	4	2	2	4	1	1	1	3	20	23	4	4	4	2	1	1	3	3	3	9	16	25
266	2021-12-01	First Year	female	12	8-10h/d	Specialties	Specialties	1.36364	4	1	1	1	1	1	1	1.42857	1	1	1	1	1	1	1	1	1.26407	4	4	4	2	4	4	3	3	3	9	22	31	4	4	4	3	3	3	2	2	2	6	21	27
267	2021-12-01	First Year	female	12	6-8h/d	High school and blow	High school and blow	1.31818	5	1	2	1	1	5	5	2.85714	4	4	4	4	4	3	2	3.57143	2.58225	1	3	3	4	3	4	4	4	4	12	18	30	3	3	3	4	4	4	4	4	4	12	21	33
268	2021-12-01	First Year	female	13	＜6h/d	High school and blow	High school and blow	1.45455	5	2	1	3	1	3	2	2.42857	2	1	1	1	2	3	3	1.85714	1.91342	2	2	2	2	2	2	1	1	1	3	12	15	3	2	2	2	2	2	1	1	1	3	13	16
269	2021-12-01	First Year	female	12	＜6h/d	High school and blow	High school and blow	1.95455	5	1	1	3	3	4	5	3.14286	3	3	3	3	3	3	3	3	2.69913	3	3	3	3	3	3	3	3	3	9	18	27	3	3	3	3	3	3	3	3	3	9	18	27
270	2021-12-01	First Year	male	13	6-8h/d	High school and blow	High school and blow	1.5	4	1	3	3	1	4	3	2.71429	4	4	2	4	4	1	1	2.85714	2.35714	3	3	3	3	2	3	4	4	4	12	17	29	3	3	3	3	2	3	4	4	4	12	17	29
271	2021-12-02	First Year	male	12	8-10h/d	High school and blow	High school and blow	1.45455	5	3	3	3	4	3	2	3.28571	2	1	1	3	4	3	3	2.42857	2.38961	3	2	2	2	2	2	3	3	3	9	13	22	3	2	2	3	2	2	3	3	3	9	14	23
272	2021-12-01	First Year	male	13	8-10h/d	Undergraduate	Undergraduate	1.5	4	3	3	5	3	5	3	3.71429	2	2	2	2	2	4	4	2.57143	2.59524	3	3	3	3	3	3	3	3	3	9	18	27	3	3	3	3	3	3	3	3	3	9	18	27
273	2021-12-01	First Year	male	13	6-8h/d	High school and blow	Undergraduate	1.09091	3	4	3	2	1	3	2	2.57143	1	1	1	4	1	1	1	1.42857	1.69697	3	3	3	3	2	3	4	4	4	12	17	29	3	3	3	3	2	2	4	4	4	12	16	28
274	2021-12-01	First Year	female	12	6-8h/d	High school and blow	High school and blow	1.86364	3	1	1	1	1	1	2	1.42857	2	2	1	2	2	2	1	1.71429	1.66883	3	3	3	3	3	3	3	3	3	9	18	27	3	3	3	3	3	3	3	3	3	9	18	27
275	2021-12-01	First Year	male	12	6-8h/d	Specialties	Specialties	1.45455	5	3	3	1	1	4	3	2.85714	2	2	2	2	3	3	3	2.42857	2.24675	2	2	2	4	4	4	2	2	4	8	18	26	4	3	3	2	2	2	3	3	3	9	16	25
276	2021-12-01	First Year	female	13	6-8h/d	Specialties	Specialties	1.18182	4	3	3	1	1	1	3	2.28571	2	2	3	2	2	2	2	2.14286	1.87013	2	3	2	2	2	2	2	2	2	6	13	19	2	3	2	2	2	2	2	2	2	6	13	19
277	2021-12-01	First Year	female	12	6-8h/d	High school and blow	High school and blow	1.13636	1	1	1	1	1	3	2	1.42857	1	1	1	2	1	3	3	1.71429	1.42641	2	2	3	2	2	2	4	4	4	12	13	25	1	1	1	1	1	1	4	4	4	12	6	18
278	2021-12-01	First Year	female	13	6-8h/d	Specialties	Undergraduate	1.5	4	1	2	1	2	3	3	2.28571	1	1	1	1	1	3	2	1.42857	1.7381	3	4	3	3	4	3	2	3	3	8	20	28	2	2	2	2	2	3	3	3	3	9	13	22
279	2021-12-01	First Year	male	12	8-10h/d	Specialties	Specialties	1.95455	4	3	3	1	1	1	2	2.14286	1	1	1	1	1	1	1	1	1.69913	4	4	4	4	4	4	1	1	1	3	24	27	4	4	4	4	4	4	1	1	1	3	24	27
280	2021-12-01	First Year	male	13	6-8h/d	Undergraduate	High school and blow	1.72727	5	1	1	3	4	2	3	2.71429	1	2	4	3	5	3	2	2.85714	2.4329	3	4	3	1	2	1	4	4	4	12	14	26	2	2	2	2	2	3	4	4	4	12	13	25
281	2021-12-01	First Year	male	13	6-8h/d	High school and blow	High school and blow	2.36364	3	1	1	1	1	1	2	1.42857	4	4	4	4	4	3	2	3.57143	2.45455	4	4	4	4	4	4	4	4	4	12	24	36	4	4	4	4	4	4	4	4	4	12	24	36
282	2021-12-01	First Year	male	13	＞10h/d	High school and blow	High school and blow	1.5	5	1	1	2	1	4	3	2.42857	3	4	2	1	2	3	3	2.57143	2.16667	4	4	4	3	3	3	3	4	4	11	21	32	4	4	4	3	3	3	4	4	4	12	21	33
283	2021-12-01	First Year	male	12	8-10h/d	High school and blow	High school and blow	1.95455	3	2	2	5	1	5	5	3.28571	5	4	5	4	5	4	5	4.57143	3.27056	3	1	3	3	3	3	4	4	4	12	16	28	3	1	1	1	3	3	4	4	4	12	12	24
284	2021-12-01	First Year	male	12	8-10h/d	High school and blow	High school and blow	2	5	3	1	2	1	3	2	2.42857	2	2	2	2	2	4	4	2.57143	2.33333	3	3	3	3	3	3	4	4	4	12	18	30	3	3	3	3	3	3	4	4	4	12	18	30
285	2021-12-01	First Year	male	12	8-10h/d	High school and blow	High school and blow	1.22727	5	1	2	1	1	3	5	2.57143	4	4	4	4	4	4	4	4	2.59957	3	3	3	4	3	2	3	4	4	11	18	29	4	4	4	4	4	3	3	4	4	11	23	34
286	2021-12-01	First Year	male	12	＞10h/d	High school and blow	High school and blow	1.18182	5	1	2	1	1	5	3	2.57143	4	4	4	4	4	1	1	3.14286	2.2987	3	3	3	3	3	3	3	3	3	9	18	27	3	3	3	3	3	3	3	3	3	9	18	27
287	2021-12-01	First Year	male	12	8-10h/d	High school and blow	High school and blow	1.40909	5	4	1	1	1	5	4	3	4	4	4	4	4	4	4	4	2.80303	3	3	4	1	1	4	3	3	3	9	16	25	4	4	4	1	1	4	4	4	4	12	18	30
288	2021-12-01	First Year	female	13	6-8h/d	High school and blow	High school and blow	2	1	1	1	5	3	1	2	2	3	3	3	3	3	3	3	3	2.33333	3	3	4	3	3	3	4	4	4	12	19	31	2	2	2	2	2	2	1	1	3	5	12	17
289	2021-12-01	First Year	male	12	6-8h/d	High school and blow	High school and blow	1.54545	3	2	1	3	2	3	3	2.42857	2	2	2	2	2	4	3	2.42857	2.1342	3	3	3	2	2	3	3	3	3	9	16	25	3	3	3	2	2	3	3	3	3	9	16	25
290	2021-12-01	First Year	male	12	8-10h/d	High school and blow	High school and blow	1.04545	4	3	2	1	1	1	5	2.42857	4	4	4	4	4	1	1	3.14286	2.20563	3	3	3	3	3	2	3	3	3	9	17	26	3	3	3	3	3	2	3	3	3	9	17	26
291	2021-12-01	First Year	male	13	8-10h/d	High school and blow	High school and blow	1.90909	5	1	2	1	1	3	4	2.42857	1	1	1	1	2	5	4	2.14286	2.16017	4	3	2	4	3	3	3	3	3	9	19	28	3	3	3	2	2	2	3	3	3	9	15	24
292	2021-12-01	First Year	male	13	8-10h/d	High school and blow	High school and blow	2.04545	5	1	2	2	2	3	3	2.57143	1	1	1	1	3	4	4	2.14286	2.25325	4	3	2	4	3	3	3	3	3	9	19	28	3	3	3	2	2	2	3	3	3	9	15	24
293	2021-12-01	First Year	female	12	6-8h/d	High school and blow	High school and blow	1.63636	5	1	2	2	5	5	5	3.57143	4	4	4	4	4	2	2	3.42857	2.87879	3	3	3	2	3	2	2	3	2	7	16	23	3	3	3	3	3	2	2	3	2	7	17	24
294	2021-12-01	First Year	female	12	6-8h/d	High school and blow	High school and blow	1.45455	5	1	1	2	1	1	2	1.85714	2	1	1	2	3	4	4	2.42857	1.91342	4	3	3	2	2	3	1	3	2	6	17	23	3	2	3	2	2	3	2	3	2	7	15	22
295	2021-12-01	First Year	female	12	6-8h/d	Undergraduate	Undergraduate	1.27273	5	1	2	1	1	1	3	2	4	1	4	1	4	1	1	2.28571	1.85281	2	2	2	2	2	2	3	2	3	8	12	20	3	3	3	2	3	2	2	2	3	7	16	23
296	2021-12-01	First Year	male	13	6-8h/d	High school and blow	High school and blow	1.31818	5	1	1	2	1	3	3	2.28571	4	4	4	4	4	2	1	3.28571	2.29654	1	1	1	1	1	1	4	4	4	12	6	18	1	1	1	1	1	1	4	4	4	12	6	18
297	2021-12-01	First Year	female	13	8-10h/d	High school and blow	High school and blow	1.45455	5	3	3	1	1	4	3	2.85714	5	5	5	5	5	1	1	3.85714	2.72294	3	4	4	4	4	2	4	2	4	10	21	31	4	4	4	4	4	4	4	4	4	12	24	36
298	2021-12-01	First Year	female	12	6-8h/d	High school and blow	High school and blow	1.40909	5	4	4	1	4	4	3	3.57143	3	3	3	3	3	4	4	3.28571	2.75541	3	3	3	3	3	2	2	2	3	7	17	24	3	3	3	3	3	2	3	3	3	9	17	26
299	2021-12-01	First Year	male	12	8-10h/d	High school and blow	High school and blow	1.95455	5	3	2	4	2	3	2	3	3	3	3	1	4	4	4	3.14286	2.69913	3	3	4	4	3	3	4	4	3	11	20	31	4	2	4	3	3	2	2	4	4	10	18	28
300	2021-12-01	First Year	male	12	6-8h/d	High school and blow	High school and blow	1.40909	3	1	4	2	2	2	3	2.42857	2	1	2	2	2	2	2	1.85714	1.89827	4	3	3	3	3	3	3	3	3	9	19	28	4	4	4	4	4	4	3	3	3	9	24	33
301	2021-12-01	First Year	female	12	6-8h/d	High school and blow	High school and blow	1.54545	4	2	2	1	2	5	5	3	3	3	3	3	3	3	2	2.85714	2.46753	3	3	3	2	2	3	3	3	3	9	16	25	3	3	3	2	2	3	3	3	3	9	16	25
302	2021-12-01	First Year	female	13	6-8h/d	Undergraduate	Undergraduate	1.22727	4	3	1	1	1	3	2	2.14286	1	1	1	1	1	1	1	1	1.45671	4	3	3	3	2	3	3	3	3	9	18	27	3	3	2	2	2	3	3	3	3	9	15	24
303	2021-12-01	First Year	male	13	6-8h/d	High school and blow	High school and blow	1.72727	5	3	2	1	2	3	2	2.57143	3	3	3	1	4	4	4	3.14286	2.48052	3	3	4	4	3	3	4	4	3	11	20	31	4	2	4	3	2	3	2	4	4	10	18	28
304	2021-12-01	First Year	female	13	6-8h/d	High school and blow	High school and blow	1.5	4	3	1	2	2	3	4	2.71429	4	2	5	1	4	1	4	3	2.40476	3	3	2	2	2	2	2	3	3	8	14	22	3	3	2	2	2	2	2	3	3	8	14	22
305	2021-12-01	First Year	female	12	8-10h/d	Specialties	Specialties	1.40909	5	1	2	2	1	1	2	2	4	2	4	3	4	2	1	2.85714	2.08874	3	3	3	2	2	4	1	3	4	8	17	25	2	2	2	1	1	1	2	2	3	7	9	16
306	2021-12-01	First Year	female	12	8-10h/d	High school and blow	Undergraduate	1.5	1	1	1	1	5	5	2	2.28571	1	1	1	1	1	5	5	2.14286	1.97619	1	3	3	2	4	3	4	4	4	12	16	28	2	3	3	1	3	3	2	4	4	10	15	25
307	2021-12-01	First Year	male	13	8-10h/d	High school and blow	High school and blow	1.63636	3	1	1	1	1	1	2	1.42857	4	4	4	4	4	4	4	4	2.35498	2	3	3	3	2	3	3	3	3	9	16	25	3	3	3	3	2	3	3	2	2	7	17	24
308	2021-12-01	First Year	female	13	6-8h/d	Specialties	Undergraduate	1.36364	1	1	1	1	3	5	5	2.42857	4	4	4	4	4	2	2	3.42857	2.40693	3	2	4	1	2	1	2	2	3	7	13	20	2	2	4	2	2	2	4	4	4	12	14	26
309	2021-12-01	First Year	female	12	6-8h/d	High school and blow	Specialties	1.63636	4	3	1	2	2	4	3	2.71429	2	2	2	2	3	4	4	2.71429	2.35498	3	4	3	3	3	3	3	3	3	9	19	28	3	3	3	2	2	3	2	4	4	10	16	26
310	2021-12-01	First Year	female	12	6-8h/d	Undergraduate	High school and blow	1.31818	5	1	1	1	1	2	2	1.85714	3	3	3	3	3	1	1	2.42857	1.86797	4	4	4	4	3	3	3	3	3	9	22	31	4	4	4	4	3	3	3	3	3	9	22	31
311	2021-12-01	First Year	male	12	6-8h/d	High school and blow	High school and blow	1.54545	4	1	1	1	1	3	2	1.85714	4	4	4	4	4	4	2	3.71429	2.37229	2	3	3	2	3	2	3	3	3	9	15	24	2	3	3	2	3	2	3	3	3	9	15	24
312	2021-12-01	First Year	male	12	8-10h/d	High school and blow	High school and blow	1.54545	4	2	2	1	1	1	3	2	3	3	3	3	2	4	4	3.14286	2.22944	2	3	3	3	2	4	3	3	3	9	17	26	2	2	4	2	2	3	3	3	3	9	15	24
313	2021-12-01	First Year	male	13	8-10h/d	High school and blow	High school and blow	2.13636	4	1	1	2	1	2	4	2.14286	4	2	4	2	4	1	1	2.57143	2.28355	2	2	2	3	3	3	3	2	3	8	15	23	3	3	3	3	3	3	3	2	3	8	18	26
314	2021-12-01	First Year	male	13	8-10h/d	High school and blow	High school and blow	1.36364	5	5	5	5	5	5	4	4.85714	5	5	5	5	5	1	1	3.85714	3.35931	1	1	1	1	1	1	2	1	1	4	6	10	3	1	1	1	1	1	1	1	1	3	8	11
315	2021-12-01	First Year	female	12	6-8h/d	High school and blow	High school and blow	1.77273	3	3	1	1	3	2	1	2	2	3	2	3	3	4	4	3	2.25758	3	3	4	3	3	3	3	3	3	9	19	28	3	3	3	3	3	3	3	3	3	9	18	27
316	2021-12-01	First Year	female	12	6-8h/d	High school and blow	High school and blow	1.86364	5	1	3	1	3	4	2	2.71429	4	4	5	4	3	2	2	3.42857	2.66883	1	2	1	3	3	3	4	1	1	6	13	19	4	2	2	2	4	4	2	2	1	5	18	23
317	2021-12-02	Senior Two	male	16	6-8h/d	Specialties	Specialties	1.40909	4	1	2	1	2	2	2	2	1	1	1	1	1	3	3	1.57143	1.66017	3	2	2	2	1	1	4	4	4	12	11	23	3	3	2	1	1	1	4	4	4	12	11	23
318	2021-12-02	Senior Two	male	16	6-8h/d	Specialties	Specialties	1.36364	4	4	2	2	2	2	2	2.57143	1	1	1	1	1	1	1	1	1.64502	3	3	2	2	2	2	4	4	4	12	14	26	3	3	3	3	3	3	4	4	4	12	18	30
319	2021-12-02	Senior Two	male	17	6-8h/d	High school and blow	High school and blow	1.59091	3	1	2	3	2	2	3	2.28571	3	3	3	3	3	3	3	3	2.29221	3	3	3	3	4	4	2	2	3	7	20	27	3	3	3	3	3	3	2	1	1	4	18	22
320	2021-12-02	Senior Two	male	17	6-8h/d	Undergraduate	Postgraduate and above	1.27273	4	2	3	3	3	3	3	3	1	3	1	3	4	4	5	3	2.42424	2	4	2	1	3	1	4	4	4	12	13	25	2	3	2	4	3	2	3	4	4	11	16	27
321	2021-12-02	Senior Two	male	17	＜6h/d	Undergraduate	Undergraduate	1.45455	5	2	2	1	1	1	2	2	1	1	1	1	1	1	1	1	1.48485	1	1	1	1	1	1	4	4	4	12	6	18	1	1	1	1	1	1	4	4	4	12	6	18
322	2021-12-02	Senior Two	male	18	6-8h/d	High school and blow	High school and blow	1.5	5	2	3	1	1	3	2	2.42857	1	1	1	1	1	2	1	1.14286	1.69048	3	2	3	2	2	2	3	3	3	9	14	23	3	2	3	2	2	2	4	4	4	12	14	26
323	2021-12-02	Senior Two	male	17	6-8h/d	Undergraduate	Undergraduate	1.13636	5	3	4	2	1	2	3	2.85714	4	4	4	4	4	1	1	3.14286	2.37879	1	1	1	3	1	1	1	1	4	6	8	14	1	2	1	1	4	1	4	4	4	12	10	22
324	2021-12-02	Senior Two	male	15	6-8h/d	High school and blow	High school and blow	1.27273	4	4	3	2	1	3	2	2.71429	2	2	2	2	2	2	2	2	1.99567	3	3	3	3	2	2	2	2	2	6	16	22	3	3	3	2	3	3	2	2	2	6	17	23
325	2021-12-02	Senior Two	male	16	6-8h/d	Specialties	Specialties	1.04545	1	1	1	1	1	1	3	1.28571	1	1	1	2	1	1	1	1.14286	1.15801	3	3	3	3	3	3	3	3	3	9	18	27	3	3	3	3	3	3	2	2	2	6	18	24
326	2021-12-02	Senior Two	female	16	6-8h/d	Specialties	Specialties	1	4	1	1	1	1	1	1	1.42857	1	1	1	1	1	1	1	1	1.14286	4	4	4	4	3	4	4	4	4	12	23	35	4	4	4	4	2	4	4	4	4	12	22	34
327	2021-12-02	Senior Two	male	16	6-8h/d	Specialties	Specialties	1.63636	5	1	2	1	2	3	3	2.42857	1	1	1	1	1	2	2	1.28571	1.78355	1	2	2	1	1	3	1	3	3	7	10	17	1	1	1	1	1	1	4	3	3	10	6	16
328	2021-12-02	Senior Two	female	18	＜6h/d	High school and blow	High school and blow	1.54545	1	1	1	1	2	3	2	1.57143	2	2	3	3	2	2	2	2.28571	1.80087	3	2	2	2	3	2	3	3	3	9	14	23	3	2	2	2	3	2	3	3	3	9	14	23
329	2021-12-02	Senior Two	male	17	＜6h/d	Specialties	Specialties	1.27273	5	1	1	1	1	1	1	1.57143	1	1	1	1	1	1	1	1	1.28139	3	3	3	2	2	4	1	1	1	3	17	20	2	3	3	2	2	4	1	1	1	3	16	19
330	2021-12-02	Senior Two	female	16	6-8h/d	High school and blow	High school and blow	1.40909	4	1	1	1	1	2	1	1.57143	1	1	1	1	1	2	2	1.28571	1.42208	3	3	3	3	2	3	3	3	3	9	17	26	2	2	2	3	2	3	3	3	3	9	14	23
331	2021-12-02	Senior Two	female	17	6-8h/d	Specialties	Undergraduate	1.04545	3	1	1	1	1	2	1	1.42857	1	1	1	1	1	1	1	1	1.15801	1	1	4	4	2	1	4	4	4	12	13	25	4	1	1	1	1	1	4	4	4	12	9	21
332	2021-12-02	Senior Two	male	16	6-8h/d	High school and blow	High school and blow	1	1	1	1	1	1	1	1	1	1	1	1	1	1	1	1	1	1	1	1	1	1	1	1	4	4	4	12	6	18	1	1	1	1	1	1	4	4	4	12	6	18
333	2021-12-02	Senior Two	male	16	6-8h/d	Specialties	Specialties	1.04545	5	2	2	3	3	3	3	3	3	3	3	3	3	3	3	3	2.34848	3	3	3	3	3	3	3	3	3	9	18	27	3	3	3	3	3	3	3	3	3	9	18	27
334	2021-12-02	Senior Two	female	16	6-8h/d	Undergraduate	Specialties	1.13636	3	1	2	1	3	3	2	2.14286	2	2	1	1	3	3	3	2.14286	1.80736	3	3	3	3	3	3	3	3	4	10	18	28	3	3	3	3	3	3	2	2	2	6	18	24
335	2021-12-02	Senior Two	male	17	6-8h/d	Specialties	Specialties	1	1	1	1	1	1	1	1	1	1	1	1	1	1	1	1	1	1	3	2	3	2	3	3	3	3	2	8	16	24	1	1	1	1	1	1	4	4	4	12	6	18
336	2021-12-02	Senior Two	female	16	6-8h/d	High school and blow	High school and blow	1.04545	2	1	1	1	1	1	1	1.14286	1	1	1	1	1	1	1	1	1.06277	2	2	2	2	4	3	3	2	2	7	15	22	1	1	1	1	1	1	4	4	4	12	6	18
337	2021-12-02	Senior Two	male	15	6-8h/d	High school and blow	High school and blow	1.27273	3	1	1	1	1	4	1	1.71429	1	1	1	1	1	1	1	1	1.329	2	2	2	2	2	2	3	3	3	9	12	21	2	2	2	2	2	2	3	3	3	9	12	21
338	2021-12-02	Senior Two	female	17	6-8h/d	High school and blow	Specialties	1.45455	4	1	1	2	2	3	1	2	1	1	1	1	1	2	2	1.28571	1.58009	3	3	2	2	2	3	3	3	3	9	15	24	3	3	3	2	3	3	3	3	3	9	17	26
339	2021-12-02	Senior Two	male	17	6-8h/d	Specialties	Specialties	1.09091	5	5	5	5	5	5	4	4.85714	3	3	3	3	3	3	3	3	2.98268	3	3	3	3	3	3	2	2	2	6	18	24	2	2	2	2	2	2	3	3	3	9	12	21
340	2021-12-02	Senior Two	female	16	6-8h/d	Undergraduate	Undergraduate	1.27273	4	2	2	1	1	1	1	1.71429	1	1	1	1	1	1	1	1	1.329	3	3	2	3	3	2	2	2	2	6	16	22	3	3	2	3	3	2	2	2	2	6	16	22
341	2021-12-02	Senior Two	male	16	＜6h/d	Undergraduate	Undergraduate	1.45455	5	4	4	1	2	5	4	3.57143	4	4	4	4	4	2	1	3.28571	2.77056	3	2	3	2	1	3	3	4	2	9	14	23	3	3	2	2	2	3	2	2	2	6	15	21
342	2021-12-02	Senior Two	female	16	6-8h/d	Specialties	Undergraduate	1.27273	4	1	1	1	1	5	2	2.14286	1	1	1	1	1	1	1	1	1.47186	2	2	2	2	3	2	2	2	2	6	13	19	2	2	2	3	3	2	3	3	3	9	14	23
343	2021-12-02	Senior Two	female	16	6-8h/d	Postgraduate and above	Postgraduate and above	1.54545	5	3	2	1	1	2	2	2.28571	1	1	1	1	1	1	1	1	1.61039	3	3	3	3	3	3	2	3	3	8	18	26	3	3	3	3	3	3	2	3	3	8	18	26
344	2021-12-02	Senior Two	male	16	＜6h/d	High school and blow	High school and blow	1.54545	3	2	2	1	1	4	2	2.14286	1	1	1	1	1	1	1	1	1.56277	1	1	3	3	3	3	3	3	3	9	14	23	1	1	1	3	3	3	3	3	3	9	12	21
345	2021-12-02	Senior Two	male	16	6-8h/d	Specialties	High school and blow	1.22727	2	1	1	1	1	2	1	1.28571	1	1	1	1	1	1	1	1	1.171	1	1	1	1	1	1	3	3	3	9	6	15	1	1	1	1	1	1	3	3	3	9	6	15
346	2021-12-02	Senior Two	female	16	6-8h/d	Specialties	Specialties	2.13636	5	2	2	1	1	4	5	2.85714	2	2	2	2	4	4	4	2.85714	2.61688	4	4	4	2	4	4	3	3	3	9	22	31	4	4	4	2	4	4	3	3	3	9	22	31
347	2021-12-02	Senior Two	female	17	6-8h/d	Specialties	Specialties	1.31818	3	1	1	1	5	1	1	1.85714	1	1	1	2	1	1	1	1.14286	1.43939	2	3	2	2	2	2	3	3	3	9	13	22	2	2	2	2	2	2	3	3	3	9	12	21
348	2021-12-02	Senior Two	male	16	6-8h/d	High school and blow	High school and blow	1.72727	3	1	1	1	1	1	2	1.42857	4	4	4	3	3	4	4	3.71429	2.29004	3	3	2	2	3	3	2	2	2	6	16	22	2	2	3	3	3	3	3	3	2	8	16	24
349	2021-12-02	Senior Two	female	16	6-8h/d	Undergraduate	Undergraduate	1.40909	5	2	3	1	1	5	2	2.71429	2	1	1	1	2	2	2	1.57143	1.89827	4	4	4	4	4	4	3	2	4	9	24	33	4	3	2	3	2	4	4	4	4	12	18	30
350	2021-12-02	Senior Two	male	16	6-8h/d	High school and blow	Specialties	1.18182	4	3	1	1	1	1	1	1.71429	2	2	2	2	2	2	2	2	1.63203	3	3	3	3	3	3	2	2	2	6	18	24	3	3	3	3	3	3	2	2	2	6	18	24
351	2021-12-02	Senior Two	male	17	8-10h/d	Specialties	Specialties	1.86364	4	2	2	3	3	3	3	2.85714	2	2	2	2	2	3	3	2.28571	2.3355	3	3	3	3	3	3	2	2	2	6	18	24	3	3	3	3	3	3	2	2	2	6	18	24
352	2021-12-02	Senior Two	female	16	＜6h/d	High school and blow	High school and blow	1.45455	4	1	1	1	1	2	1	1.57143	2	1	1	2	1	1	1	1.28571	1.43723	3	3	3	2	2	3	3	3	3	9	16	25	1	3	2	2	2	2	2	2	2	6	12	18
353	2021-12-02	Senior Two	male	16	＜6h/d	High school and blow	High school and blow	1.45455	5	2	2	1	1	1	1	1.85714	1	1	1	1	1	1	1	1	1.43723	1	1	1	1	1	1	4	4	4	12	6	18	1	1	1	1	1	1	4	4	4	12	6	18
354	2021-12-02	Senior Two	male	16	＜6h/d	High school and blow	High school and blow	1.36364	5	1	1	1	1	1	1	1.57143	1	1	1	1	1	1	1	1	1.31169	2	2	2	2	2	2	3	3	3	9	12	21	2	2	2	2	2	2	3	3	3	9	12	21
355	2021-12-02	Senior Two	female	16	6-8h/d	Undergraduate	Undergraduate	1.13636	3	1	1	1	3	2	1	1.71429	2	1	1	1	1	2	2	1.42857	1.42641	4	1	4	4	1	2	2	2	3	7	16	23	4	4	4	4	4	4	4	4	4	12	24	36
356	2021-12-02	Senior Two	male	17	6-8h/d	Specialties	Specialties	1.36364	4	1	1	1	1	2	1	1.57143	1	1	1	1	1	1	1	1	1.31169	2	2	2	1	1	1	2	2	2	6	9	15	1	1	1	1	1	1	2	2	2	6	6	12
357	2021-12-02	Senior Two	male	17	6-8h/d	High school and blow	High school and blow	1.27273	4	3	3	1	4	4	4	3.28571	1	1	1	1	1	1	1	1	1.85281	3	3	3	3	3	3	3	3	3	9	18	27	3	3	3	3	3	3	2	2	2	6	18	24
358	2021-12-02	Senior Two	female	17	6-8h/d	Undergraduate	Undergraduate	1.27273	5	2	2	1	1	1	1	1.85714	1	1	1	1	1	1	1	1	1.37662	4	3	3	3	3	3	2	2	1	5	19	24	2	3	3	3	3	3	2	3	3	8	17	25
359	2021-12-02	Senior Two	female	16	6-8h/d	High school and blow	Specialties	1.04545	3	1	1	1	1	3	2	1.71429	1	1	1	1	1	1	1	1	1.25325	3	3	2	2	4	3	2	2	3	7	17	24	3	3	2	2	3	3	2	2	3	7	16	23
360	2021-12-02	Senior Two	male	16	6-8h/d	Undergraduate	Undergraduate	2.04545	2	2	2	3	3	3	5	2.85714	5	5	5	5	5	5	5	5	3.30087	4	4	4	4	4	4	4	4	4	12	24	36	4	4	4	4	4	4	4	4	4	12	24	36
361	2021-12-02	Senior Two	female	17	6-8h/d	High school and blow	High school and blow	1.27273	5	2	2	2	2	4	2	2.71429	2	2	2	2	2	4	4	2.57143	2.18615	4	3	3	4	3	2	2	2	1	5	19	24	4	2	2	4	4	2	2	2	3	7	18	25
362	2021-12-02	Senior Two	female	16	＜6h/d	High school and blow	High school and blow	1.13636	4	1	1	1	1	1	1	1.42857	1	1	1	1	1	1	1	1	1.18831	2	2	2	1	1	1	2	3	3	8	9	17	4	2	2	3	3	1	3	2	3	8	15	23
363	2021-12-02	Senior Two	female	16	6-8h/d	High school and blow	High school and blow	1.18182	4	1	1	1	1	2	1	1.57143	1	1	1	1	1	1	1	1	1.25108	2	2	2	3	3	3	3	3	3	9	15	24	1	1	1	1	1	3	3	3	3	9	8	17
364	2021-12-02	Senior Two	male	16	6-8h/d	High school and blow	High school and blow	1.13636	3	1	1	1	1	1	3	1.57143	1	1	1	1	1	1	1	1	1.23593	3	3	3	2	2	2	2	2	2	6	15	21	3	3	3	2	2	2	2	2	2	6	15	21
365	2021-12-02	Senior Two	male	17	6-8h/d	Undergraduate	Undergraduate	1.72727	5	1	3	3	4	4	4	3.42857	4	4	4	4	4	4	4	4	3.05195	4	4	4	4	4	3	3	3	3	9	23	32	4	4	4	4	4	4	4	3	3	10	24	34
366	2021-12-02	Senior Two	male	16	6-8h/d	Undergraduate	Undergraduate	3.04545	5	5	5	5	5	5	4	4.85714	4	4	4	4	4	4	4	4	3.96753	4	4	4	4	4	4	2	2	2	6	24	30	4	4	4	4	4	4	1	1	1	3	24	27
367	2021-12-02	Senior Two	male	16	6-8h/d	Specialties	Specialties	1.40909	5	1	4	4	1	5	3	3.28571	1	2	3	4	1	5	5	3	2.56494	3	3	3	3	3	3	3	3	3	9	18	27	3	3	3	3	3	3	3	3	3	9	18	27
368	2021-12-02	Senior Two	female	16	6-8h/d	High school and blow	High school and blow	1.18182	5	1	1	3	5	5	2	3.14286	1	1	1	1	1	1	1	1	1.77489	2	3	3	3	2	2	3	3	3	9	15	24	1	1	1	1	1	1	3	3	3	9	6	15
369	2021-12-01	First Year	male	12	8-10h/d	Specialties	Specialties	2.36364	4	4	4	3	1	3	3	3.14286	2	2	2	2	3	4	4	2.71429	2.74026	4	3	3	2	3	3	3	3	3	9	18	27	3	3	2	1	4	3	3	3	3	9	16	25
370	2021-12-01	First Year	female	12	8-10h/d	High school and blow	High school and blow	1.59091	2	3	1	2	1	1	3	1.85714	2	2	2	2	2	2	2	2	1.81602	4	4	4	4	4	4	3	3	3	9	24	33	4	4	4	4	4	4	2	2	2	6	24	30
371	2021-12-01	First Year	female	13	8-10h/d	High school and blow	High school and blow	2.04545	3	2	2	3	3	3	3	2.71429	2	2	2	2	2	4	4	2.57143	2.44372	4	4	4	3	3	1	4	4	4	12	19	31	4	4	4	3	3	1	4	4	4	12	19	31
372	2021-12-01	First Year	male	13	8-10h/d	Undergraduate	Undergraduate	1.5	3	1	1	1	1	1	1	1.28571	3	3	3	3	3	2	1	2.57143	1.78571	3	2	2	2	4	3	4	4	4	12	16	28	1	1	1	3	3	2	4	4	4	12	11	23
373	2021-12-01	First Year	male	13	8-10h/d	High school and blow	Undergraduate	2.22727	5	1	1	5	5	5	4	3.71429	4	4	3	4	3	4	5	3.85714	3.26623	3	4	4	3	4	2	3	3	3	9	20	29	3	3	4	3	3	2	4	4	4	12	18	30
374	2021-12-01	First Year	female	12	6-8h/d	High school and blow	High school and blow	1.5	3	1	2	3	2	3	2	2.28571	5	5	5	2	3	2	5	3.85714	2.54762	2	1	2	1	4	1	3	4	4	11	11	22	2	1	1	4	1	2	2	4	4	10	11	21
375	2021-12-01	First Year	female	13	8-10h/d	High school and blow	High school and blow	1.45455	3	2	2	1	2	3	3	2.28571	2	2	2	1	2	2	2	1.85714	1.8658	3	2	3	2	2	3	1	3	3	7	15	22	3	3	2	3	3	2	1	3	3	7	16	23
376	2021-12-01	First Year	male	12	8-10h/d	Undergraduate	Undergraduate	1.86364	5	1	1	5	5	5	5	3.85714	5	5	5	5	5	5	5	5	3.57359	4	1	1	1	4	1	1	1	1	3	12	15	4	4	4	4	4	4	1	1	1	3	24	27
377	2021-12-01	First Year	male	12	6-8h/d	Undergraduate	High school and blow	1.63636	4	4	3	3	2	5	4	3.57143	4	4	4	4	4	4	4	4	3.06926	3	3	2	2	3	2	3	3	3	9	15	24	3	3	3	2	3	3	3	3	2	8	17	25
378	2021-12-01	First Year	female	13	6-8h/d	Specialties	Specialties	1.86364	3	1	2	1	2	4	2	2.14286	2	1	2	1	2	1	2	1.57143	1.85931	3	2	2	2	2	3	2	2	2	6	14	20	1	2	3	3	3	3	2	2	2	6	15	21
379	2021-12-01	First Year	female	13	8-10h/d	Specialties	Specialties	1.68182	4	1	1	1	1	3	1	1.71429	5	5	5	3	3	3	3	3.85714	2.41775	4	4	4	3	4	4	1	1	1	3	23	26	4	4	4	3	4	4	1	1	1	3	23	26
380	2021-12-01	First Year	female	12	6-8h/d	High school and blow	High school and blow	2.77273	4	3	3	5	4	4	4	3.85714	4	4	4	4	4	4	4	4	3.54329	4	4	3	4	4	4	2	2	1	5	23	28	3	3	3	3	3	3	2	2	2	6	18	24
381	2021-12-01	First Year	female	12	8-10h/d	High school and blow	High school and blow	2.90909	4	5	1	4	2	5	4	3.57143	5	2	1	2	2	3	2	2.42857	2.9697	1	2	3	3	2	1	4	4	4	12	12	24	4	4	4	1	1	1	4	4	4	12	15	27
382	2021-12-01	First Year	female	12	8-10h/d	High school and blow	High school and blow	1.54545	5	2	1	3	5	4	5	3.57143	3	3	3	3	3	4	4	3.28571	2.80087	3	3	3	3	3	3	2	2	2	6	18	24	3	3	3	3	3	3	2	2	2	6	18	24
383	2021-12-01	First Year	male	12	8-10h/d	High school and blow	High school and blow	1	3	1	1	1	1	1	1	1.28571	1	1	1	1	1	1	1	1	1.09524	2	2	2	2	2	2	4	4	4	12	12	24	1	1	1	1	1	1	3	3	3	9	6	15
384	2021-12-01	First Year	female	12	6-8h/d	Undergraduate	High school and blow	1.5	3	1	1	3	1	4	2	2.14286	4	4	4	4	2	4	4	3.71429	2.45238	3	2	2	3	2	4	3	3	3	9	16	25	3	3	3	3	2	4	3	3	3	9	18	27
385	2021-12-01	First Year	female	12	8-10h/d	High school and blow	Specialties	2.77273	5	1	1	5	1	3	5	3	3	3	3	3	3	4	4	3.28571	3.01948	3	3	3	3	3	3	2	2	2	6	18	24	3	3	3	3	3	3	2	2	2	6	18	24
386	2021-12-01	First Year	male	13	＞10h/d	Postgraduate and above	Undergraduate	3.09091	5	1	1	5	1	3	5	3	3	3	3	3	3	4	4	3.28571	3.12554	3	4	3	2	3	4	4	1	4	9	19	28	3	4	3	2	3	4	4	1	4	9	19	28
387	2021-12-01	First Year	female	14	6-8h/d	High school and blow	High school and blow	1.31818	5	1	1	1	1	2	2	1.85714	4	4	4	4	4	2	2	3.42857	2.2013	2	3	3	3	2	3	3	2	3	8	16	24	2	2	3	3	3	3	2	2	3	7	16	23
388	2021-12-01	First Year	female	12	6-8h/d	High school and blow	High school and blow	1.18182	4	2	1	3	3	3	2	2.57143	2	2	2	1	1	4	1	1.85714	1.87013	3	3	3	3	2	2	2	2	2	6	16	22	3	3	3	3	2	2	3	2	2	7	16	23
389	2021-12-01	First Year	male	13	8-10h/d	Postgraduate and above	Postgraduate and above	1.72727	3	2	2	1	1	3	2	2	3	3	3	3	4	3	3	3.14286	2.29004	2	3	2	3	3	3	4	4	4	12	16	28	3	3	3	3	3	3	4	4	4	12	18	30
390	2021-12-01	First Year	female	12	8-10h/d	Undergraduate	Postgraduate and above	2.09091	5	2	2	2	3	3	5	3.14286	4	4	4	4	5	5	5	4.42857	3.22078	4	4	4	4	4	4	4	4	4	12	24	36	4	4	4	4	4	4	4	4	4	12	24	36
391	2021-12-01	First Year	female	13	8-10h/d	Undergraduate	High school and blow	1.68182	4	1	1	1	5	5	5	3.14286	4	4	4	4	4	4	4	4	2.94156	3	3	3	3	3	3	2	2	2	6	18	24	3	3	3	3	3	3	2	2	2	6	18	24
392	2021-12-01	First Year	female	13	6-8h/d	High school and blow	High school and blow	1.77273	4	1	1	2	2	2	2	2	2	2	2	1	1	4	4	2.28571	2.01948	4	4	4	3	3	3	3	3	3	9	21	30	2	3	3	4	4	2	3	3	3	9	18	27
393	2021-12-01	First Year	female	13	6-8h/d	High school and blow	Postgraduate and above	1.54545	5	1	1	1	1	4	1	2	5	5	5	4	3	5	5	4.57143	2.70563	2	3	2	2	3	2	4	4	4	12	14	26	4	4	4	4	3	3	3	3	3	9	22	31
394	2021-12-01	First Year	male	14	＜6h/d	High school and blow	High school and blow	1.40909	3	2	3	1	1	2	2	2	1	2	2	2	1	2	2	1.71429	1.70779	2	2	2	3	2	3	2	3	2	7	14	21	2	3	3	3	2	3	2	3	2	7	16	23
395	2021-12-01	First Year	female	12	6-8h/d	Specialties	High school and blow	1.86364	4	1	1	1	1	5	5	2.57143	4	4	4	4	4	4	4	4	2.81169	3	2	2	2	3	1	4	4	4	12	13	25	1	1	1	1	1	1	4	4	4	12	6	18
396	2021-12-01	First Year	female	12	6-8h/d	High school and blow	Specialties	1.22727	5	1	1	1	1	1	2	1.71429	1	1	1	1	1	1	1	1	1.31385	4	4	4	4	4	4	4	4	4	12	24	36	4	4	4	4	4	4	4	4	4	12	24	36
397	2021-12-01	First Year	female	13	6-8h/d	High school and blow	High school and blow	1.18182	5	1	1	1	1	1	3	1.85714	4	4	4	2	2	1	1	2.57143	1.87013	3	3	3	1	1	3	4	4	4	12	14	26	3	2	1	1	1	1	4	4	4	12	9	21
398	2021-12-01	First Year	female	13	6-8h/d	High school and blow	High school and blow	1.40909	5	1	1	2	3	3	3	2.57143	3	3	3	2	2	3	2	2.57143	2.18398	1	1	1	1	1	2	4	3	2	9	7	16	2	1	1	1	1	2	4	3	1	8	8	16
399	2021-12-01	First Year	female	13	6-8h/d	High school and blow	High school and blow	1.31818	5	2	2	3	1	3	2	2.57143	2	2	2	1	2	3	1	1.85714	1.91558	2	3	3	2	2	3	2	2	3	7	15	22	1	3	2	2	1	3	2	3	3	8	12	20
400	2021-12-01	First Year	female	12	6-8h/d	High school and blow	High school and blow	1.31818	4	2	1	3	1	3	2	2.28571	4	4	4	1	1	3	3	2.85714	2.15368	1	1	1	1	1	1	4	4	4	12	6	18	3	3	3	3	2	3	3	3	3	9	17	26
401	2021-12-01	First Year	male	13	6-8h/d	Specialties	Undergraduate	1.13636	2	3	1	1	1	3	2	1.85714	3	3	3	3	3	3	3	3	1.99784	3	3	3	2	2	3	2	2	2	6	16	22	2	2	2	2	2	3	3	3	3	9	13	22
402	2021-12-01	First Year	female	12	8-10h/d	Undergraduate	Postgraduate and above	1.81818	4	1	1	2	1	3	3	2.14286	2	2	3	3	2	3	1	2.28571	2.08225	3	4	3	3	4	4	1	1	1	3	21	24	4	4	4	4	4	4	1	1	1	3	24	27
403	2021-12-01	First Year	female	13	6-8h/d	High school and blow	High school and blow	2.04545	4	1	1	2	1	4	2	2.14286	2	2	2	1	1	3	1	1.71429	1.96753	4	1	1	1	4	1	1	1	1	3	12	15	1	1	1	1	1	1	4	4	4	12	6	18
404	2021-12-01	First Year	female	12	6-8h/d	High school and blow	High school and blow	1.5	5	1	1	3	5	4	1	2.85714	3	2	2	2	4	3	4	2.85714	2.40476	1	1	3	2	4	1	4	4	4	12	12	24	1	1	1	1	1	1	1	2	1	4	6	10
405	2021-12-01	First Year	male	12	8-10h/d	Specialties	Specialties	1.13636	3	1	1	1	1	1	2	1.42857	4	1	1	1	1	1	1	1.42857	1.33117	2	4	2	2	3	2	3	3	2	8	15	23	2	2	3	2	2	1	2	3	3	8	12	20
406	2021-12-01	First Year	male	12	8-10h/d	High school and blow	High school and blow	1.63636	3	3	3	1	1	1	2	2	4	1	1	1	2	3	3	2.14286	1.92641	4	4	4	4	1	3	1	1	1	3	20	23	4	4	4	4	4	4	1	1	1	3	24	27
407	2021-12-01	First Year	female	12	6-8h/d	Specialties	Specialties	1.09091	3	1	1	1	1	2	2	1.57143	2	2	1	1	1	1	1	1.28571	1.31602	3	3	3	3	3	3	3	3	3	9	18	27	3	3	3	3	3	3	3	3	3	9	18	27
408	2021-12-01	First Year	female	12	8-10h/d	High school and blow	High school and blow	1.09091	3	1	1	2	2	3	3	2.14286	1	1	1	1	1	2	2	1.28571	1.50649	3	3	3	3	3	3	3	3	3	9	18	27	3	3	3	3	3	3	3	3	3	9	18	27
409	2021-12-01	First Year	male	12	8-10h/d	High school and blow	High school and blow	1.5	4	2	5	3	2	3	2	3	2	1	1	2	3	3	2	2	2.16667	3	2	2	3	3	3	3	3	3	9	16	25	3	3	3	3	3	3	2	2	2	6	18	24
410	2021-12-01	First Year	male	12	8-10h/d	Specialties	Specialties	2	2	2	2	3	1	3	1	2	3	3	3	3	3	3	3	3	2.33333	4	4	4	4	4	4	1	1	1	3	24	27	4	4	4	4	4	4	1	1	1	3	24	27
411	2021-12-01	First Year	female	12	6-8h/d	High school and blow	High school and blow	1.13636	5	1	1	2	2	2	1	2	5	5	5	1	1	1	1	2.71429	1.95022	3	3	3	3	3	3	2	3	3	8	18	26	3	3	3	3	3	3	2	3	3	8	18	26
412	2021-12-01	First Year	male	12	8-10h/d	High school and blow	High school and blow	1.40909	3	1	1	1	3	4	3	2.28571	1	1	3	5	5	5	5	3.57143	2.42208	3	2	3	2	2	3	2	3	3	8	15	23	3	2	3	3	2	2	2	3	4	9	15	24
413	2021-12-01	First Year	male	12	8-10h/d	Specialties	Specialties	1.59091	5	1	1	2	2	4	5	2.85714	4	4	4	4	4	4	4	4	2.81602	3	3	3	3	3	3	3	3	3	9	18	27	3	3	3	3	3	3	3	3	3	9	18	27
414	2021-12-01	First Year	female	13	6-8h/d	Specialties	Undergraduate	1.68182	3	2	3	2	2	3	2	2.42857	4	4	4	3	2	2	1	2.85714	2.32251	3	2	2	3	2	3	3	2	3	8	15	23	3	2	2	3	2	3	3	2	3	8	15	23
415	2021-12-01	First Year	male	12	8-10h/d	Specialties	Specialties	1.5	5	5	3	1	1	5	3	3.28571	4	4	4	1	1	5	5	3.42857	2.7381	3	3	2	2	2	3	4	4	4	12	15	27	3	3	2	2	2	3	4	4	4	12	15	27
416	2021-12-01	First Year	female	12	8-10h/d	Undergraduate	Undergraduate	1.40909	5	2	1	2	2	2	2	2.28571	5	5	5	2	2	3	3	3.57143	2.42208	4	4	4	4	4	4	4	3	4	11	24	35	3	3	3	3	3	4	4	3	4	11	19	30
417	2021-12-01	First Year	female	12	8-10h/d	High school and blow	High school and blow	1.18182	4	1	1	1	1	5	4	2.42857	3	3	3	1	1	1	1	1.85714	1.82251	3	2	2	2	2	2	3	3	3	9	13	22	3	2	2	2	2	2	3	3	3	9	13	22
418	2021-12-01	First Year	female	13	8-10h/d	Specialties	Specialties	1.68182	5	1	2	1	1	2	2	2	2	2	2	1	1	1	1	1.42857	1.70346	2	3	1	3	3	1	3	3	3	9	13	22	2	2	2	3	3	1	3	3	3	9	13	22
419	2021-12-01	First Year	female	13	8-10h/d	High school and blow	High school and blow	1.40909	3	2	2	1	1	1	2	1.71429	1	1	1	1	1	1	1	1	1.37446	3	1	2	2	3	3	4	4	4	12	14	26	3	3	3	3	3	3	4	4	4	12	18	30
420	2021-12-01	First Year	male	12	8-10h/d	Undergraduate	Undergraduate	1.40909	4	1	1	1	3	4	3	2.42857	3	3	2	2	2	4	4	2.85714	2.2316	4	4	4	3	3	2	3	3	2	8	20	28	4	4	3	3	2	2	3	3	2	8	18	26
421	2021-12-02	Senior Two	female	16	6-8h/d	Undergraduate	High school and blow	1.09091	5	2	1	1	1	2	1	1.85714	1	1	1	1	1	4	1	1.42857	1.45887	4	4	3	3	1	1	3	3	3	9	16	25	3	3	3	1	1	1	4	4	4	12	12	24
422	2021-12-02	Senior Two	female	17	6-8h/d	Undergraduate	Undergraduate	1.40909	4	1	1	1	1	1	2	1.57143	3	3	3	3	3	3	3	3	1.99351	4	4	4	4	4	4	1	1	1	3	24	27	4	4	4	4	4	4	1	1	1	3	24	27
423	2021-12-02	Senior Two	male	16	6-8h/d	Undergraduate	Undergraduate	2.13636	5	4	4	5	5	5	4	4.57143	5	5	5	5	5	5	5	5	3.9026	4	4	4	4	4	4	1	1	1	3	24	27	3	3	3	3	3	3	2	2	2	6	18	24
424	2021-12-02	Senior Two	female	16	6-8h/d	High school and blow	Undergraduate	1.31818	4	3	1	3	2	2	2	2.42857	2	2	2	2	2	2	2	2	1.91558	4	3	3	3	3	2	4	4	4	12	18	30	4	2	2	3	3	2	4	4	4	12	16	28
425	2021-12-02	Senior Two	male	16	6-8h/d	High school and blow	High school and blow	1.13636	3	1	1	2	2	2	1	1.71429	1	1	1	1	1	1	1	1	1.28355	3	3	3	3	3	3	2	2	2	6	18	24	3	3	3	3	3	3	2	2	2	6	18	24
426	2021-12-02	Senior Two	male	16	8-10h/d	Specialties	Specialties	1.31818	4	3	3	5	2	2	3	3.14286	2	5	2	5	5	5	5	4.14286	2.86797	3	3	3	3	3	2	3	3	3	9	17	26	3	3	3	3	3	2	3	3	3	9	17	26
427	2021-12-02	Senior Two	female	16	＜6h/d	High school and blow	High school and blow	1.72727	4	1	2	1	2	2	2	2	1	4	1	4	1	1	1	1.85714	1.86147	2	2	2	2	2	2	3	3	3	9	12	21	3	3	2	2	2	2	3	3	3	9	14	23
428	2021-12-02	Senior Two	male	16	＞10h/d	Undergraduate	Undergraduate	1.04545	2	1	1	1	1	1	2	1.28571	1	1	1	1	1	1	1	1	1.11039	1	1	1	1	1	4	1	1	1	3	9	12	1	1	1	1	1	4	1	1	1	3	9	12
429	2021-12-02	Senior Two	male	16	＜6h/d	High school and blow	High school and blow	1.13636	5	1	1	1	1	1	1	1.57143	1	1	1	1	1	1	1	1	1.23593	2	2	2	3	2	2	4	4	4	12	13	25	1	2	1	1	1	1	3	4	4	11	7	18
430	2021-12-02	Senior Two	male	16	6-8h/d	Specialties	Specialties	2.54545	3	3	3	4	2	2	1	2.57143	2	2	3	3	3	3	3	2.71429	2.61039	3	2	2	2	3	4	2	3	4	9	16	25	2	3	2	4	3	3	3	3	2	8	17	25
431	2021-12-02	Senior Two	male	17	＜6h/d	Specialties	Specialties	1.45455	5	2	1	1	1	1	2	1.85714	1	5	1	5	1	1	1	2.14286	1.81818	3	3	3	3	1	1	2	2	3	7	14	21	3	3	3	3	1	1	4	4	4	12	14	26
432	2021-12-02	Senior Two	male	16	6-8h/d	Specialties	Specialties	1.31818	3	1	1	1	1	1	2	1.42857	3	3	3	3	3	4	4	3.28571	2.01082	3	3	3	3	3	3	3	3	3	9	18	27	3	3	3	3	3	3	3	3	3	9	18	27
433	2021-12-02	Senior Two	male	16	6-8h/d	High school and blow	High school and blow	2.13636	5	4	3	4	3	4	5	4	3	3	3	3	3	3	3	3	3.04545	3	3	3	3	3	3	2	2	2	6	18	24	3	3	3	3	3	3	2	2	2	6	18	24
434	2021-12-02	Senior Two	female	16	6-8h/d	Specialties	Specialties	1.18182	4	3	3	2	3	3	2	2.85714	2	2	2	2	2	2	2	2	2.01299	3	3	3	3	3	3	3	3	3	9	18	27	3	3	3	3	3	3	3	3	3	9	18	27
435	2021-12-02	Senior Two	male	17	＜6h/d	High school and blow	High school and blow	1.59091	5	1	3	2	1	3	4	2.71429	2	4	2	4	4	4	4	3.42857	2.57792	1	1	1	1	1	1	4	4	4	12	6	18	1	1	1	1	1	1	4	4	4	12	6	18
436	2021-12-02	Senior Two	male	17	＜6h/d	High school and blow	High school and blow	1.45455	4	1	1	1	2	2	2	1.85714	2	3	2	3	2	4	4	2.85714	2.05628	4	2	3	3	3	1	2	1	1	4	16	20	3	2	3	3	3	1	2	1	1	4	15	19
437	2021-12-02	Senior Two	female	17	6-8h/d	High school and blow	High school and blow	1.31818	3	1	3	2	1	2	2	2	1	2	1	2	2	3	3	2	1.77273	2	2	2	2	2	2	3	3	3	9	12	21	2	2	2	2	2	2	3	3	3	9	12	21
438	2021-12-02	Senior Two	male	17	6-8h/d	Undergraduate	High school and blow	1.13636	5	2	3	1	1	4	3	2.71429	4	4	4	4	4	4	4	4	2.61688	2	2	2	1	1	1	4	4	4	12	9	21	1	1	1	1	1	1	4	4	4	12	6	18
439	2021-12-02	Senior Two	male	17	＜6h/d	Undergraduate	Specialties	1.40909	4	2	2	1	1	3	2	2.14286	1	2	1	2	1	4	4	2.14286	1.89827	3	2	2	4	1	2	4	4	4	12	14	26	2	2	3	3	3	2	3	4	4	11	15	26
440	2021-12-02	Senior Two	female	17	＜6h/d	High school and blow	High school and blow	1.68182	5	2	3	1	1	3	4	2.71429	2	4	2	4	5	1	1	2.71429	2.37013	1	1	1	1	1	1	1	2	3	6	6	12	1	1	1	1	1	1	4	4	4	12	6	18
441	2021-12-02	Senior Two	male	16	＜6h/d	Undergraduate	Undergraduate	1.59091	5	3	1	3	1	3	2	2.57143	2	2	3	2	4	2	1	2.28571	2.14935	3	1	3	3	4	4	4	4	4	12	18	30	4	4	4	4	4	4	1	1	1	3	24	27
442	2021-12-02	Senior Two	female	16	6-8h/d	High school and blow	High school and blow	1.36364	3	2	1	1	1	5	2	2.14286	1	1	1	1	1	1	1	1	1.50216	4	4	4	4	4	4	1	1	1	3	24	27	4	4	4	4	4	4	1	1	1	3	24	27
443	2021-12-02	Senior Two	male	17	6-8h/d	Specialties	Specialties	1.36364	4	3	3	3	1	1	1	2.28571	3	3	3	3	3	1	1	2.42857	2.02597	3	3	3	2	2	3	2	1	2	5	16	21	2	2	2	2	2	3	3	4	4	11	13	24
444	2021-12-02	Senior Two	female	16	8-10h/d	Undergraduate	Undergraduate	1.5	5	2	2	1	3	4	3	2.85714	3	3	3	3	3	3	3	3	2.45238	1	1	1	1	1	1	4	4	4	12	6	18	1	1	1	1	1	1	4	4	4	12	6	18
445	2021-12-02	Senior Two	male	16	6-8h/d	High school and blow	High school and blow	1.77273	5	5	3	2	2	2	3	3.14286	3	3	3	3	3	2	1	2.57143	2.49567	4	3	3	3	3	3	2	2	2	6	19	25	2	2	2	2	2	2	3	3	3	9	12	21
446	2021-12-02	Senior Two	female	16	＜6h/d	High school and blow	High school and blow	1.86364	5	3	1	1	1	4	2	2.42857	2	2	2	2	2	2	2	2	2.0974	2	2	2	2	2	2	3	3	3	9	12	21	2	2	2	2	2	2	3	3	3	9	12	21
447	2021-12-02	Senior Two	male	16	6-8h/d	Undergraduate	Undergraduate	1.59091	5	2	2	1	1	4	3	2.57143	2	2	2	2	2	2	2	2	2.05411	2	2	1	2	2	1	3	4	3	10	10	20	2	2	2	1	2	1	3	4	4	11	10	21
448	2021-12-02	Senior Two	female	17	6-8h/d	Undergraduate	Specialties	1.22727	5	3	1	1	1	2	2	2.14286	1	2	1	2	1	1	1	1.28571	1.55195	3	3	3	2	2	3	4	3	4	11	16	27	2	2	2	2	2	2	3	3	3	9	12	21
449	2021-12-02	Senior Two	male	16	＜6h/d	Specialties	Undergraduate	1.5	4	2	3	3	4	3	2	3	2	2	2	2	2	3	3	2.28571	2.2619	1	1	2	2	3	2	4	4	3	11	11	22	3	3	3	2	2	3	4	4	4	12	16	28
450	2021-12-02	Senior Two	female	17	6-8h/d	Specialties	Specialties	1.54545	3	1	2	1	1	1	1	1.42857	2	3	2	3	2	2	2	2.28571	1.75325	3	3	3	2	2	2	2	2	2	6	15	21	2	2	3	2	3	3	2	2	2	6	15	21
451	2021-12-02	Senior Two	male	16	＜6h/d	Specialties	Specialties	1.54545	5	2	4	1	2	2	5	3	4	4	4	4	4	2	1	3.28571	2.61039	1	1	1	1	1	1	4	4	4	12	6	18	3	3	3	1	1	1	4	4	4	12	12	24
452	2021-12-02	Senior Two	male	17	＜6h/d	Undergraduate	High school and blow	1.90909	5	1	3	3	5	4	5	3.71429	4	5	4	5	4	3	3	4	3.20779	3	2	2	3	3	2	2	1	3	6	15	21	3	2	2	3	3	2	2	1	3	6	15	21
453	2021-12-02	Senior Two	female	16	6-8h/d	Undergraduate	High school and blow	1.18182	3	1	2	2	2	2	2	2	2	2	2	2	2	3	3	2.28571	1.82251	2	2	3	2	3	3	3	3	2	8	15	23	3	3	3	3	2	3	2	2	3	7	17	24
454	2021-12-02	Senior Two	female	16	6-8h/d	Undergraduate	Postgraduate and above	1.36364	4	1	1	1	1	3	1	1.71429	1	1	1	1	1	1	1	1	1.35931	4	2	2	1	1	1	2	2	2	6	11	17	2	2	2	1	1	2	3	2	3	8	10	18
455	2021-12-02	Senior Two	male	16	6-8h/d	High school and blow	Undergraduate	1.36364	2	1	1	1	1	3	2	1.57143	1	1	1	4	5	5	5	3.14286	2.02597	2	1	1	1	1	1	2	2	2	6	7	13	1	1	1	4	1	1	3	3	3	9	9	18
456	2021-12-02	Senior Two	male	16	6-8h/d	Undergraduate	High school and blow	2	4	2	2	2	3	2	4	2.71429	3	3	2	4	2	1	3	2.57143	2.42857	1	1	2	3	2	3	4	2	3	9	12	21	2	2	3	2	3	1	2	3	2	7	13	20
457	2021-12-02	Senior Two	female	17	6-8h/d	High school and blow	High school and blow	1.22727	4	1	1	1	1	3	2	1.85714	2	1	1	2	1	2	2	1.57143	1.55195	3	3	2	2	2	3	3	3	3	9	15	24	3	3	3	2	2	2	3	3	3	9	15	24
458	2021-12-02	Senior Two	female	17	6-8h/d	High school and blow	High school and blow	1.22727	5	1	1	1	1	1	1	1.57143	1	1	1	1	1	1	1	1	1.26623	3	2	3	2	2	2	3	3	3	9	14	23	2	2	2	2	2	2	3	3	3	9	12	21
459	2021-12-02	Senior Two	male	16	6-8h/d	Specialties	Specialties	1.04545	4	2	1	1	1	3	2	2	1	2	1	2	2	3	2	1.85714	1.6342	4	3	3	2	3	2	4	4	4	12	17	29	3	2	2	2	2	2	4	3	4	11	13	24
460	2021-12-02	Senior Two	male	17	＜6h/d	High school and blow	High school and blow	1.04545	1	1	2	3	2	3	2	2	2	2	2	2	2	2	2	2	1.68182	3	3	3	3	3	3	2	2	2	6	18	24	3	3	3	3	3	3	2	2	2	6	18	24
461	2021-12-02	Senior Two	female	17	6-8h/d	Undergraduate	Undergraduate	1.31818	4	3	2	2	1	3	2	2.42857	2	2	3	2	3	3	3	2.57143	2.10606	2	2	3	1	2	1	3	2	3	8	11	19	3	1	2	1	2	2	3	3	3	9	11	20
462	2021-12-02	Senior Two	male	16	6-8h/d	Undergraduate	Specialties	1.18182	4	5	5	3	1	1	3	3.14286	4	4	4	4	4	2	2	3.42857	2.58442	3	2	2	2	2	2	1	1	1	3	13	16	3	2	2	2	2	4	1	1	1	3	15	18
463	2021-12-02	Senior Two	male	16	6-8h/d	High school and blow	High school and blow	1.63636	4	2	1	1	1	5	4	2.57143	2	2	2	2	2	2	2	2	2.06926	4	3	3	2	2	3	3	2	1	6	17	23	3	3	3	2	2	3	3	1	1	5	16	21
464	2021-12-02	Senior Two	male	16	6-8h/d	Postgraduate and above	Postgraduate and above	1.54545	5	2	5	2	2	4	4	3.42857	3	4	3	4	4	3	3	3.42857	2.80087	3	2	3	3	3	2	4	4	4	12	16	28	3	3	3	3	3	2	4	4	4	12	17	29
465	2021-12-02	Senior Two	male	16	＜6h/d	Undergraduate	Undergraduate	1.31818	3	1	2	2	2	3	2	2.14286	2	2	2	2	2	4	1	2.14286	1.86797	4	3	2	2	2	2	2	4	4	10	15	25	2	4	4	3	3	3	3	4	4	11	19	30
466	2021-12-02	Senior Two	female	17	6-8h/d	Undergraduate	Postgraduate and above	1.40909	5	3	2	1	1	5	2	2.71429	1	1	1	1	1	1	1	1	1.70779	3	3	3	3	3	3	3	3	2	8	18	26	3	3	3	3	3	3	3	3	2	8	18	26
467	2021-12-02	Senior Two	female	17	＜6h/d	Specialties	Specialties	1.40909	4	2	2	1	2	3	2	2.28571	2	2	2	2	2	1	1	1.71429	1.80303	1	3	2	2	3	2	2	2	2	6	13	19	1	2	2	2	2	2	3	3	3	9	11	20
468	2021-12-02	Senior Two	male	17	＜6h/d	Specialties	Specialties	1.27273	5	3	3	3	2	4	1	3	2	2	2	1	1	1	1	1.42857	1.90043	2	3	2	2	1	4	3	1	2	6	14	20	1	1	1	1	1	3	2	1	3	6	8	14
469	2021-12-02	Senior Two	female	16	6-8h/d	High school and blow	High school and blow	1.27273	4	1	3	1	1	1	1	1.71429	1	3	1	3	1	1	1	1.57143	1.51948	4	4	3	3	3	3	3	3	3	9	20	29	4	4	4	3	3	3	3	3	3	9	21	30
470	2021-12-02	Senior Two	male	17	8-10h/d	Specialties	Specialties	1.31818	4	1	1	3	1	4	2	2.28571	1	1	1	1	1	3	3	1.57143	1.72511	1	1	1	1	1	1	4	4	4	12	6	18	1	1	1	1	1	1	4	4	4	12	6	18
471	2021-12-02	Senior Two	female	16	6-8h/d	High school and blow	High school and blow	1.27273	3	1	1	1	1	3	1	1.57143	2	2	1	2	1	1	1	1.42857	1.42424	4	2	3	2	2	2	2	2	3	7	15	22	4	3	3	2	3	2	3	3	3	9	17	26
472	2021-12-02	Senior Two	female	17	6-8h/d	High school and blow	Undergraduate	1.59091	4	1	2	2	2	4	2	2.42857	2	3	2	3	2	1	3	2.28571	2.10173	3	3	3	2	2	3	3	3	3	9	16	25	3	3	3	3	3	2	3	3	4	10	17	27
473	2021-12-03	Senior One	male	16	6-8h/d	Specialties	Specialties	1.31818	3	3	2	2	4	3	2	2.71429	2	1	2	2	1	2	2	1.71429	1.91558	3	3	3	3	3	3	2	2	2	6	18	24	3	3	3	3	3	3	2	2	2	6	18	24
474	2021-12-03	Senior One	female	16	6-8h/d	High school and blow	High school and blow	1.31818	2	1	2	2	2	1	2	1.71429	1	2	1	2	2	1	1	1.42857	1.48701	3	3	4	3	4	3	1	2	1	4	20	24	3	4	3	4	3	4	2	1	2	5	21	26
475	2021-12-03	Senior One	male	16	＜6h/d	High school and blow	High school and blow	1.5	4	1	2	1	2	3	2	2.14286	3	2	2	2	2	2	2	2.14286	1.92857	3	3	3	3	3	3	2	2	2	6	18	24	3	3	3	3	3	3	2	2	2	6	18	24
476	2021-12-03	Senior One	female	15	6-8h/d	High school and blow	High school and blow	1.54545	4	1	1	1	4	3	2	2.28571	4	4	4	4	4	3	3	3.71429	2.51515	1	1	1	1	1	1	4	4	4	12	6	18	1	1	1	1	1	1	4	4	4	12	6	18
477	2021-12-03	Senior One	female	15	＜6h/d	High school and blow	High school and blow	1.5	5	1	2	1	2	3	1	2.14286	2	1	2	1	2	2	1	1.57143	1.7381	2	2	2	2	2	2	3	3	3	9	12	21	2	2	2	2	2	2	3	3	3	9	12	21
478	2021-12-03	Senior One	female	16	6-8h/d	High school and blow	High school and blow	1.13636	4	1	1	1	1	4	1	1.85714	1	1	1	1	3	3	3	1.85714	1.61688	1	1	1	1	1	1	3	3	3	9	6	15	1	1	1	1	1	1	3	3	3	9	6	15
479	2021-12-03	Senior One	female	15	6-8h/d	High school and blow	High school and blow	1.18182	1	1	1	1	1	4	1	1.42857	1	1	1	1	1	1	1	1	1.20346	1	1	1	1	1	2	4	4	4	12	7	19	3	2	2	1	1	1	4	4	4	12	10	22
480	2021-12-03	Senior One	female	15	＜6h/d	High school and blow	Undergraduate	1.63636	5	2	2	1	1	3	1	2.14286	3	3	3	3	3	3	3	3	2.25974	4	4	4	4	4	4	1	1	1	3	24	27	4	4	4	4	4	4	1	1	1	3	24	27
481	2021-12-03	Senior One	male	16	＜6h/d	High school and blow	High school and blow	1.54545	4	1	1	5	3	4	3	3	2	2	2	2	2	2	2	2	2.18182	3	3	3	3	2	3	2	2	2	6	17	23	3	3	3	3	2	2	2	3	3	8	16	24
482	2021-12-03	Senior One	male	16	＜6h/d	High school and blow	High school and blow	1.36364	4	1	2	1	1	2	2	1.85714	2	1	1	2	1	1	1	1.28571	1.50216	1	1	1	1	1	2	4	4	4	12	7	19	1	1	1	1	1	2	4	4	4	12	7	19
483	2021-12-03	Senior One	female	14	6-8h/d	Postgraduate and above	Undergraduate	1.31818	3	2	1	1	3	2	1	1.85714	2	1	1	1	2	1	1	1.28571	1.48701	4	3	2	1	2	1	2	3	2	7	13	20	4	2	1	1	2	1	2	2	2	6	11	17
484	2021-12-03	Senior One	male	15	6-8h/d	Undergraduate	High school and blow	1.13636	1	1	1	1	1	3	1	1.28571	1	1	1	1	1	1	1	1	1.14069	4	4	4	4	4	4	1	1	1	3	24	27	4	4	4	4	4	2	2	2	2	6	22	28
485	2021-12-03	Senior One	female	15	＜6h/d	High school and blow	Specialties	1.31818	3	2	3	1	3	2	3	2.42857	3	3	3	3	3	2	2	2.71429	2.15368	2	2	3	3	4	3	3	2	3	8	17	25	3	3	3	3	2	2	3	3	3	9	16	25
486	2021-12-03	Senior One	female	15	6-8h/d	High school and blow	High school and blow	1.68182	3	2	2	2	2	3	2	2.28571	1	1	1	1	1	3	3	1.57143	1.84632	3	4	3	3	2	4	4	2	2	8	19	27	2	3	3	2	2	3	3	2	1	6	15	21
487	2021-12-03	Senior One	male	14	6-8h/d	Specialties	Specialties	1.72727	4	1	2	2	2	3	2	2.28571	2	1	1	1	1	1	1	1.14286	1.71861	3	3	3	3	3	3	4	4	4	12	18	30	3	3	3	3	3	3	2	4	4	10	18	28
488	2021-12-03	Senior One	female	14	6-8h/d	Specialties	Undergraduate	1.27273	4	1	1	2	1	3	3	2.14286	1	1	1	1	2	2	1	1.28571	1.5671	3	3	3	3	3	3	3	3	3	9	18	27	3	3	3	3	3	3	3	3	3	9	18	27
489	2021-12-03	Senior One	female	15	＜6h/d	High school and blow	High school and blow	1.36364	4	1	2	2	1	5	3	2.57143	1	1	2	2	2	3	3	2	1.97835	1	1	1	1	1	1	4	4	4	12	6	18	1	1	1	1	1	1	4	4	4	12	6	18
490	2021-12-03	Senior One	female	16	6-8h/d	High school and blow	High school and blow	1.27273	4	1	2	1	2	4	1	2.14286	2	1	3	1	1	1	1	1.42857	1.61472	2	1	1	3	4	1	4	4	4	12	12	24	2	2	2	2	2	1	4	4	4	12	11	23
491	2021-12-03	Senior One	male	14	＜6h/d	High school and blow	Undergraduate	1.31818	5	2	2	1	1	3	3	2.42857	2	1	1	2	1	1	1	1.28571	1.67749	1	1	1	1	1	1	4	4	4	12	6	18	1	1	1	1	1	1	4	4	4	12	6	18
492	2021-12-03	Senior One	female	15	6-8h/d	High school and blow	High school and blow	1.36364	3	2	2	1	1	2	1	1.71429	1	1	1	1	1	1	1	1	1.35931	3	3	3	3	3	3	2	2	2	6	18	24	3	3	3	3	3	3	2	2	2	6	18	24
493	2021-12-03	Senior One	male	15	＜6h/d	High school and blow	High school and blow	1.04545	2	1	1	2	2	2	2	1.71429	2	1	1	2	1	1	1	1.28571	1.34848	3	2	2	3	2	2	3	3	3	9	14	23	2	1	1	3	2	2	3	3	3	9	11	20
494	2022-01-03	Senior One	male	16	6-8h/d	Specialties	Undergraduate	1.40909	5	1	1	2	4	2	4	2.71429	2	2	2	4	1	1	5	2.42857	2.18398	3	1	2	1	4	2	2	2	4	8	13	21	3	3	3	3	3	1	3	3	3	9	16	25
495	2021-12-03	Senior One	male	15	6-8h/d	High school and blow	High school and blow	1.18182	4	1	2	1	1	1	2	1.71429	1	1	1	1	1	1	1	1	1.2987	3	2	3	3	2	3	4	3	2	9	16	25	1	1	1	1	1	1	4	4	4	12	6	18
496	2021-12-03	Senior One	female	15	6-8h/d	Specialties	Specialties	1.22727	3	1	1	1	1	2	1	1.42857	1	1	1	1	1	2	1	1.14286	1.26623	2	2	3	3	2	2	3	3	3	9	14	23	2	2	3	3	2	2	3	3	3	9	14	23
497	2021-12-03	Senior One	male	15	6-8h/d	Undergraduate	Undergraduate	1.04545	2	1	1	1	1	1	2	1.28571	1	2	1	1	1	1	1	1.14286	1.15801	3	3	3	3	3	3	3	3	3	9	18	27	3	3	3	3	3	3	2	2	2	6	18	24
498	2021-12-03	Senior One	female	15	＜6h/d	Specialties	Specialties	1.18182	4	1	1	2	1	1	1	1.57143	2	2	2	2	3	3	3	2.42857	1.72727	1	1	1	1	4	3	3	3	3	9	11	20	1	1	1	1	1	1	4	4	4	12	6	18
499	2021-12-03	Senior One	male	15	6-8h/d	High school and blow	High school and blow	1.09091	3	1	1	1	1	2	1	1.42857	1	1	1	1	1	1	1	1	1.17316	2	2	2	2	2	2	2	3	2	7	12	19	2	2	2	2	2	2	3	3	3	9	12	21
500	2021-12-03	Senior One	female	15	6-8h/d	High school and blow	High school and blow	1.68182	3	1	2	1	1	1	2	1.57143	2	1	1	1	1	2	3	1.57143	1.60823	3	3	3	3	3	3	3	3	2	8	18	26	3	3	3	3	3	3	4	4	3	11	18	29
501	2021-12-03	Senior One	female	15	6-8h/d	Undergraduate	Undergraduate	1.18182	4	2	2	2	1	3	3	2.42857	3	3	3	3	3	2	2	2.71429	2.10823	3	3	3	2	3	3	3	3	4	10	17	27	2	3	3	3	3	2	3	3	3	9	16	25
502	2021-12-03	Senior One	female	15	＜6h/d	Specialties	Undergraduate	1.22727	3	1	1	1	1	3	2	1.71429	1	3	2	1	3	1	1	1.71429	1.55195	3	1	2	1	2	3	3	3	4	10	12	22	3	2	2	1	2	3	3	3	4	10	13	23
503	2021-12-03	Senior One	female	15	6-8h/d	Undergraduate	High school and blow	1.18182	4	2	1	2	2	3	2	2.28571	2	2	2	2	2	2	2	2	1.82251	2	2	2	3	3	2	3	3	3	9	14	23	3	2	2	3	3	2	2	2	2	6	15	21
504	2021-12-03	Senior One	male	15	6-8h/d	Specialties	Specialties	1.36364	4	1	2	1	1	1	4	2	3	3	3	3	3	1	1	2.42857	1.93074	3	3	3	3	3	3	3	3	3	9	18	27	3	3	3	3	3	3	2	2	2	6	18	24
505	2021-12-03	Senior One	female	15	＜6h/d	High school and blow	Undergraduate	1	1	1	1	1	1	1	2	1.14286	1	1	1	1	1	1	1	1	1.04762	3	2	2	2	2	2	3	3	3	9	13	22	3	3	3	2	2	2	3	3	3	9	15	24
506	2021-12-03	Senior One	female	15	6-8h/d	Specialties	Specialties	1.13636	4	2	1	1	1	4	1	2	1	1	1	1	1	1	1	1	1.37879	3	3	3	3	3	2	4	4	4	12	17	29	3	3	3	3	3	3	4	4	4	12	18	30
507	2021-12-03	Senior One	male	16	6-8h/d	Undergraduate	High school and blow	1.04545	2	1	1	1	1	2	1	1.28571	2	1	1	2	1	1	1	1.28571	1.20563	1	1	1	1	1	1	4	4	4	12	6	18	1	1	1	1	1	1	4	4	4	12	6	18
508	2021-12-03	Senior One	female	16	6-8h/d	Undergraduate	Undergraduate	1.18182	5	1	1	2	2	3	2	2.28571	5	4	4	4	4	3	3	3.85714	2.44156	2	3	2	2	2	3	3	3	3	9	14	23	2	3	3	2	2	3	3	3	3	9	15	24
509	2021-12-03	Senior One	male	15	6-8h/d	High school and blow	High school and blow	1.40909	4	1	2	2	2	4	1	2.28571	4	1	1	3	1	1	1	1.71429	1.80303	1	1	1	2	4	2	4	4	4	12	11	23	1	1	1	3	4	1	4	4	4	12	11	23
510	2021-12-03	Senior One	female	15	6-8h/d	Specialties	Specialties	1.22727	1	2	2	1	2	4	1	1.85714	1	1	1	1	2	4	4	2	1.69481	2	3	3	2	3	2	4	4	4	12	15	27	2	3	3	2	2	2	4	4	4	12	14	26
511	2021-12-03	Senior One	male	16	6-8h/d	Undergraduate	Undergraduate	1.09091	3	1	1	1	2	1	1	1.42857	2	1	1	2	1	1	1	1.28571	1.2684	1	1	1	1	1	1	2	3	3	8	6	14	3	1	1	1	1	1	2	3	3	8	8	16
512	2021-12-03	Senior One	female	15	6-8h/d	High school and blow	High school and blow	1.18182	5	1	1	2	1	3	2	2.14286	2	1	1	2	1	2	2	1.57143	1.63203	4	4	3	3	4	3	3	3	3	9	21	30	3	3	3	2	4	3	3	3	3	9	18	27
513	2021-12-03	Senior One	female	16	6-8h/d	High school and blow	High school and blow	1.13636	3	1	1	2	1	3	2	1.85714	1	1	1	1	1	1	1	1	1.33117	3	2	4	2	2	2	2	2	3	7	15	22	2	2	2	2	2	2	2	2	3	7	12	19
514	2021-12-03	Senior One	female	15	＜6h/d	High school and blow	High school and blow	1.40909	5	1	1	3	3	3	3	2.71429	1	1	1	1	3	5	4	2.28571	2.13636	3	2	2	3	1	3	2	2	2	6	14	20	1	1	1	1	1	1	4	4	4	12	6	18
515	2021-12-03	Senior One	male	15	6-8h/d	Specialties	Undergraduate	1.27273	4	1	1	1	1	2	1	1.57143	1	1	1	1	1	2	2	1.28571	1.37662	3	2	2	3	3	3	4	4	4	12	16	28	2	1	2	3	3	2	4	4	4	12	13	25
516	2021-12-03	Senior One	female	16	6-8h/d	Undergraduate	Undergraduate	1.22727	5	1	1	1	1	1	2	1.71429	2	2	2	1	1	2	2	1.71429	1.55195	3	3	3	3	2	2	3	3	3	9	16	25	2	2	2	3	2	2	3	3	3	9	13	22
517	2021-12-03	Senior One	male	16	6-8h/d	Undergraduate	Postgraduate and above	1.22727	4	2	2	2	2	1	1	2	1	1	1	1	1	2	1	1.14286	1.45671	4	3	3	3	3	2	4	4	4	12	18	30	2	2	2	3	3	2	4	4	4	12	14	26
518	2021-12-03	Senior One	female	16	6-8h/d	Undergraduate	Undergraduate	1.86364	4	3	2	2	2	3	3	2.71429	2	2	2	2	4	4	5	3	2.52597	3	3	3	4	3	2	3	3	3	9	18	27	3	3	3	3	3	2	3	3	3	9	17	26
519	2021-12-03	Senior One	male	16	6-8h/d	Specialties	Specialties	1.09091	5	1	1	1	1	3	4	2.28571	1	1	1	1	1	2	1	1.14286	1.50649	1	1	1	1	2	1	3	3	3	9	7	16	3	3	3	3	3	3	2	3	3	8	18	26
520	2021-12-03	Senior One	male	16	＜6h/d	Undergraduate	Undergraduate	1.5	5	3	4	5	1	3	1	3.14286	4	1	1	4	2	4	1	2.42857	2.35714	1	1	1	1	1	2	1	3	3	7	7	14	4	4	4	4	4	1	4	4	4	12	21	33
521	2021-12-03	Senior One	male	15	6-8h/d	High school and blow	High school and blow	1.90909	5	1	1	3	3	3	1	2.42857	2	2	2	2	2	2	2	2	2.11255	3	3	3	3	3	3	2	2	2	6	18	24	3	3	3	3	3	3	2	2	2	6	18	24
522	2021-12-03	Senior One	female	16	6-8h/d	High school and blow	Undergraduate	1.13636	5	1	5	5	2	4	1	3.28571	2	2	2	2	2	2	2	2	2.14069	2	2	2	2	2	3	3	3	2	8	13	21	2	2	2	2	2	3	2	2	2	6	13	19
523	2021-12-03	Senior One	female	16	6-8h/d	High school and blow	High school and blow	1.04545	4	1	2	1	1	1	1	1.57143	3	1	1	3	1	3	3	2.14286	1.58658	3	3	3	2	2	3	3	3	2	8	16	24	3	3	3	2	2	3	3	3	3	9	16	25
524	2021-12-03	Senior One	male	15	6-8h/d	Specialties	Specialties	1.27273	5	3	1	1	1	1	2	2	2	2	2	2	2	2	2	2	1.75758	4	4	4	3	3	2	4	4	4	12	20	32	4	4	4	3	3	3	2	2	2	6	21	27
525	2021-12-03	Senior One	male	15	＜6h/d	Undergraduate	Undergraduate	1.22727	5	2	2	1	1	1	2	2	1	1	1	1	1	1	1	1	1.40909	2	3	3	3	3	2	3	3	3	9	16	25	2	3	3	3	3	2	3	3	3	9	16	25
526	2021-12-03	Senior One	male	15	6-8h/d	Undergraduate	Undergraduate	1.86364	5	2	1	3	2	3	3	2.71429	2	2	2	2	2	3	3	2.28571	2.28788	2	1	1	3	3	3	1	3	4	8	13	21	2	1	1	3	3	3	2	2	2	6	13	19
527	2021-12-03	Senior One	female	15	6-8h/d	High school and blow	High school and blow	1.27273	4	1	1	1	1	4	2	2	1	1	1	1	1	1	1	1	1.42424	3	3	3	2	3	2	3	2	3	8	16	24	3	3	3	3	3	3	3	3	3	9	18	27
528	2021-12-01	Senior One	male	15	6-8h/d	Undergraduate	Undergraduate	1.27273	4	3	3	2	2	1	2	2.42857	2	1	1	2	1	3	3	1.85714	1.85281	3	3	3	3	3	3	3	3	3	9	18	27	3	3	3	3	3	3	3	3	3	9	18	27
529	2021-12-01	Senior One	male	15	6-8h/d	High school and blow	High school and blow	1.04545	4	1	1	2	2	2	2	2	2	2	2	2	2	2	1	1.85714	1.6342	1	1	1	2	2	2	3	3	3	9	9	18	2	2	2	2	2	2	3	3	3	9	12	21
530	2021-12-01	Senior One	male	16	6-8h/d	High school and blow	Specialties	1.31818	3	2	2	3	4	3	2	2.71429	2	1	1	1	1	2	3	1.57143	1.86797	2	3	2	3	3	3	3	2	2	7	16	23	3	3	3	3	3	3	2	2	2	6	18	24
531	2021-12-01	Senior One	female	16	＜6h/d	Specialties	Specialties	1.63636	5	1	2	2	3	3	2	2.57143	3	1	2	1	2	1	2	1.71429	1.97403	3	3	3	2	2	3	3	3	3	9	16	25	3	3	3	3	2	2	3	3	3	9	16	25
532	2021-12-01	Senior One	male	16	＜6h/d	Specialties	Specialties	1.18182	3	1	1	1	2	2	1	1.57143	1	1	1	1	1	3	3	1.57143	1.44156	3	2	2	2	1	2	2	2	2	6	12	18	3	2	2	2	1	2	2	2	2	6	12	18
533	2021-12-01	Senior One	male	15	6-8h/d	High school and blow	High school and blow	1.09091	5	4	4	1	1	3	1	2.71429	1	1	1	1	1	3	3	1.57143	1.79221	3	3	3	3	3	3	3	3	3	9	18	27	3	3	3	3	3	3	2	2	2	6	18	24
534	2021-12-01	Senior One	female	15	6-8h/d	Specialties	High school and blow	1.54545	4	3	4	1	1	3	3	2.71429	3	3	3	3	3	3	3	3	2.41991	3	3	3	3	3	3	3	3	3	9	18	27	3	3	3	3	3	3	3	3	3	9	18	27
535	2021-12-01	Senior One	female	15	6-8h/d	Undergraduate	Undergraduate	1.22727	5	1	2	1	1	3	2	2.14286	1	1	2	2	1	1	2	1.42857	1.59957	3	2	2	2	2	2	4	4	3	11	13	24	4	3	3	4	4	2	3	3	3	9	20	29
536	2021-12-01	Senior One	female	15	6-8h/d	Specialties	Specialties	2.86364	4	2	2	3	4	3	3	3	4	4	4	4	4	4	4	4	3.28788	3	3	3	3	3	3	2	2	2	6	18	24	3	3	3	3	3	3	2	2	2	6	18	24
537	2021-12-01	Senior One	female	15	6-8h/d	Specialties	High school and blow	1.45455	5	4	2	1	1	2	2	2.42857	1	1	1	1	1	2	2	1.28571	1.72294	3	3	3	2	2	1	4	4	4	12	14	26	4	3	3	1	1	1	4	4	4	12	13	25
538	2021-12-01	Senior One	male	16	6-8h/d	Undergraduate	Undergraduate	1.36364	5	2	4	3	3	3	4	3.42857	3	3	3	3	3	2	2	2.71429	2.50216	3	2	3	3	4	4	1	1	2	4	19	23	3	3	3	4	4	3	2	1	2	5	20	25
539	2021-12-01	Senior One	female	15	6-8h/d	High school and blow	High school and blow	1.31818	5	1	2	1	2	2	2	2.14286	2	2	2	2	2	3	3	2.28571	1.91558	3	3	3	2	2	3	3	4	4	11	16	27	2	2	2	2	3	2	3	3	3	9	13	22
540	2021-12-01	Senior One	male	15	6-8h/d	Specialties	Specialties	1.40909	3	1	1	3	3	4	2	2.42857	2	3	3	3	4	4	4	3.28571	2.37446	3	3	3	3	3	3	2	2	2	6	18	24	3	3	3	3	3	3	2	2	2	6	18	24
541	2021-12-01	Senior One	male	15	6-8h/d	Specialties	Specialties	3.40909	3	3	3	4	5	4	3	3.57143	3	3	3	3	3	3	3	3	3.32684	3	3	3	3	3	3	2	2	2	6	18	24	3	3	3	3	3	3	2	2	2	6	18	24
542	2021-12-01	Senior One	female	15	6-8h/d	Specialties	Specialties	1.27273	4	2	1	1	1	4	3	2.28571	2	2	2	2	2	2	2	2	1.85281	3	2	2	2	2	2	4	4	2	10	13	23	3	3	2	2	2	2	3	3	3	9	14	23
543	2021-12-01	Senior One	male	16	6-8h/d	High school and blow	High school and blow	1.22727	4	1	2	3	1	2	2	2.14286	2	2	2	2	2	2	2	2	1.79004	3	2	2	2	2	3	3	2	3	8	14	22	2	2	2	2	2	3	3	3	3	9	13	22
544	2021-12-01	Senior One	female	16	6-8h/d	Undergraduate	Specialties	1.27273	5	2	2	1	1	2	2	2.14286	2	2	2	2	2	2	2	2	1.80519	2	3	2	4	4	3	4	4	4	12	18	30	4	3	3	3	2	3	4	4	4	12	18	30
545	2021-12-01	Senior One	female	15	＜6h/d	High school and blow	High school and blow	1.09091	1	1	2	1	2	3	1	1.57143	1	1	1	1	1	1	1	1	1.22078	2	2	2	2	2	2	2	2	3	7	12	19	2	2	2	2	2	2	2	2	2	6	12	18
546	2021-12-01	Senior One	male	16	6-8h/d	Undergraduate	Undergraduate	1.45455	4	1	2	1	1	3	2	2	2	1	1	2	1	2	1	1.42857	1.62771	3	3	3	2	2	3	3	3	3	9	16	25	3	3	3	2	2	3	3	3	3	9	16	25
547	2021-12-01	Senior One	female	16	6-8h/d	High school and blow	High school and blow	1.18182	4	1	1	2	1	3	2	2	1	1	1	1	1	1	1	1	1.39394	4	3	3	1	3	2	2	2	3	7	16	23	2	2	2	2	2	2	2	3	3	8	12	20
548	2021-12-01	Senior One	female	16	＜6h/d	High school and blow	High school and blow	1.27273	3	1	2	2	1	4	4	2.42857	2	2	2	2	2	3	2	2.14286	1.94805	2	2	2	2	2	3	3	3	2	8	13	21	2	3	3	2	2	3	3	3	3	9	15	24
549	2021-12-01	Senior One	female	16	＜6h/d	High school and blow	High school and blow	2	4	3	3	2	2	2	3	2.71429	2	2	2	2	2	2	2	2	2.2381	3	3	3	3	3	3	2	2	2	6	18	24	3	3	3	3	3	3	2	2	2	6	18	24
550	2021-12-01	Senior One	female	15	＜6h/d	High school and blow	High school and blow	1.18182	4	1	1	2	1	2	1	1.71429	1	1	1	1	1	1	1	1	1.2987	3	3	3	3	3	3	3	2	2	7	18	25	3	3	3	3	3	2	4	4	4	12	17	29
551	2021-12-01	Senior One	male	15	6-8h/d	Specialties	High school and blow	1.18182	4	2	2	1	1	2	2	2	1	1	1	1	1	2	1	1.14286	1.44156	2	2	2	2	2	2	3	3	3	9	12	21	2	2	2	2	2	2	3	3	3	9	12	21
552	2021-12-01	Senior One	male	15	6-8h/d	High school and blow	High school and blow	2.90909	5	3	2	3	3	4	4	3.42857	4	4	4	4	4	4	4	4	3.44589	2	3	3	3	3	2	3	3	3	9	16	25	3	2	3	3	3	2	3	3	3	9	16	25
553	2021-12-01	Senior One	male	14	6-8h/d	High school and blow	High school and blow	1.5	5	1	1	2	2	2	2	2.14286	2	2	2	2	2	2	2	2	1.88095	4	4	4	4	2	2	2	2	2	6	20	26	4	4	4	4	2	2	2	2	2	6	20	26
554	2021-12-01	Senior One	male	16	6-8h/d	Specialties	Specialties	1.45455	4	3	3	3	1	3	2	2.71429	4	4	4	4	4	3	3	3.71429	2.62771	3	3	3	3	3	3	4	4	4	12	18	30	3	3	3	3	3	3	3	3	3	9	18	27
555	2021-12-01	Senior One	female	16	＜6h/d	Undergraduate	Undergraduate	2.09091	5	3	2	4	1	5	2	3.14286	3	3	3	3	3	3	3	3	2.74459	3	3	3	3	3	2	2	3	2	7	17	24	3	3	3	3	3	3	2	3	2	7	18	25
556	2021-12-01	Senior One	male	15	6-8h/d	Postgraduate and above	Postgraduate and above	1.04545	1	1	1	1	1	2	1	1.14286	1	1	1	1	1	1	1	1	1.06277	3	3	2	2	2	3	2	2	2	6	15	21	2	3	3	2	2	3	2	2	2	6	15	21
557	2021-12-01	Senior One	female	16	＜6h/d	High school and blow	High school and blow	1.54545	1	1	1	1	1	5	1	1.57143	4	4	4	4	4	1	1	3.14286	2.08658	3	3	3	1	1	1	4	4	4	12	12	24	3	3	3	1	1	1	4	4	4	12	12	24
558	2021-12-01	Senior One	female	17	6-8h/d	High school and blow	High school and blow	1.31818	3	2	1	1	1	3	1	1.71429	1	1	1	1	1	2	2	1.28571	1.43939	3	3	2	2	2	3	4	4	4	12	15	27	3	3	2	2	2	2	4	4	4	12	14	26
559	2021-12-01	Senior One	male	16	6-8h/d	High school and blow	High school and blow	1.18182	5	1	1	2	1	3	2	2.14286	1	1	1	1	1	2	2	1.28571	1.5368	2	2	2	2	2	2	3	3	3	9	12	21	2	2	2	2	2	2	3	3	3	9	12	21
560	2022-01-21	Senior One	female	16	6-8h/d	Undergraduate	Undergraduate	1.31818	5	1	2	1	1	4	2	2.28571	1	1	1	1	1	2	2	1.28571	1.62987	3	3	3	3	3	3	3	3	3	9	18	27	3	3	3	3	3	3	3	3	3	9	18	27
561	2021-12-01	Senior One	female	15	6-8h/d	High school and blow	High school and blow	1.45455	3	1	1	1	1	4	3	2	2	2	2	2	2	2	2	2	1.81818	3	3	3	2	2	2	3	3	3	9	15	24	2	2	2	2	2	2	3	3	3	9	12	21
562	2021-12-01	Senior One	female	15	6-8h/d	Undergraduate	Undergraduate	1.09091	5	1	1	1	3	2	1	2	1	1	1	1	1	1	1	1	1.36364	3	4	4	3	2	3	4	4	4	12	19	31	3	4	4	2	3	3	4	4	4	12	19	31
563	2021-12-01	Senior One	female	15	6-8h/d	Specialties	Undergraduate	1.45455	4	1	2	2	2	2	2	2.14286	2	2	2	2	2	2	2	2	1.8658	3	3	3	3	3	3	2	2	2	6	18	24	3	3	3	3	3	3	2	2	2	6	18	24
564	2021-12-01	Senior One	female	15	6-8h/d	High school and blow	High school and blow	1.09091	4	1	1	1	1	1	1	1.42857	2	2	2	2	1	1	1	1.57143	1.36364	4	4	4	4	4	4	1	1	1	3	24	27	4	4	4	4	4	4	1	1	1	3	24	27
565	2021-12-01	Senior One	female	16	＜6h/d	High school and blow	High school and blow	1	1	1	2	1	1	3	1	1.42857	1	1	1	1	1	1	1	1	1.14286	1	1	1	1	1	1	4	4	4	12	6	18	1	1	1	1	1	1	4	4	4	12	6	18
566	2021-12-01	Senior One	female	15	6-8h/d	Undergraduate	Undergraduate	1.36364	4	1	1	1	1	4	3	2.14286	1	1	1	1	1	1	1	1	1.50216	3	3	3	3	3	3	3	3	3	9	18	27	3	3	3	3	3	3	3	3	3	9	18	27
567	2021-12-01	Senior One	male	16	6-8h/d	High school and blow	High school and blow	1.63636	5	5	5	3	3	3	4	4	4	4	4	4	4	4	4	4	3.21212	3	3	2	3	3	2	2	2	1	5	16	21	4	3	4	3	4	3	2	2	1	5	21	26
568	2021-12-01	Senior One	male	16	6-8h/d	Specialties	High school and blow	1.27273	4	2	3	2	2	4	2	2.71429	3	2	2	3	2	4	3	2.71429	2.23377	3	2	2	3	4	3	3	3	3	9	17	26	3	2	3	4	3	3	3	3	3	9	18	27
569	2021-12-01	Senior One	male	15	6-8h/d	Specialties	Specialties	4.36364	5	4	4	5	4	4	3	4.14286	4	4	4	4	4	4	4	4	4.16883	3	3	3	3	3	3	2	2	2	6	18	24	3	3	3	3	3	3	2	2	2	6	18	24
570	2021-12-01	Second Year	male	13	6-8h/d	Specialties	Specialties	2.09091	3	2	1	1	1	1	2	1.57143	5	5	5	5	5	1	1	3.85714	2.50649	1	1	1	1	1	1	4	4	4	12	6	18	2	2	2	2	2	2	3	3	3	9	12	21
571	2021-12-01	Second Year	male	13	＜6h/d	Specialties	Specialties	1.13636	3	2	2	1	1	1	2	1.71429	1	1	1	1	1	1	1	1	1.28355	1	1	1	1	1	1	1	1	1	3	6	9	1	1	1	1	1	1	1	1	1	3	6	9
572	2021-12-01	Second Year	male	13	6-8h/d	Specialties	Specialties	1.86364	1	5	5	5	5	5	5	4.42857	5	5	5	5	5	4	4	4.71429	3.66883	4	4	4	4	4	4	3	2	2	7	24	31	4	4	4	4	4	4	1	1	1	3	24	27
573	2021-12-01	Second Year	female	13	6-8h/d	Specialties	Specialties	1.5	3	3	3	2	1	2	2	2.28571	1	1	1	1	1	1	1	1	1.59524	3	3	3	3	3	3	3	3	3	9	18	27	3	3	3	3	3	3	3	3	3	9	18	27
574	2021-12-01	Second Year	female	13	8-10h/d	Specialties	Specialties	1.68182	3	1	1	1	1	1	2	1.42857	2	2	2	2	2	2	2	2	1.70346	3	3	3	3	3	3	2	2	2	6	18	24	3	3	3	3	3	3	2	2	2	6	18	24
575	2021-12-01	Second Year	female	13	＞10h/d	High school and blow	High school and blow	2.5	3	1	1	1	1	1	2	1.42857	1	1	1	1	1	1	1	1	1.64286	3	3	3	3	3	3	3	3	3	9	18	27	3	3	3	3	3	3	3	3	3	9	18	27
576	2021-12-01	Second Year	female	13	8-10h/d	High school and blow	High school and blow	2.13636	5	2	2	5	3	3	5	3.57143	4	3	2	2	1	5	5	3.14286	2.95022	3	3	3	3	3	3	3	3	3	9	18	27	3	3	3	3	3	3	3	3	3	9	18	27
577	2021-12-01	Second Year	female	13	＜6h/d	Specialties	Specialties	1.5	4	5	5	2	1	3	2	3.14286	2	2	2	2	2	1	2	1.85714	2.16667	3	3	3	3	3	3	2	2	2	6	18	24	3	3	3	3	3	3	3	3	3	9	18	27
578	2021-12-01	Second Year	male	13	6-8h/d	Specialties	Specialties	1.68182	5	4	2	1	5	5	3	3.57143	1	1	1	1	1	1	1	1	2.08442	3	3	3	3	3	3	2	2	2	6	18	24	3	3	3	3	3	3	2	2	2	6	18	24
579	2021-12-01	Second Year	female	14	8-10h/d	High school and blow	High school and blow	1.45455	5	3	4	4	1	2	2	3	1	2	3	4	5	5	4	3.42857	2.62771	1	2	3	4	3	2	4	4	3	11	15	26	1	2	3	2	4	1	3	2	1	6	13	19
580	2021-12-01	Second Year	female	13	8-10h/d	Specialties	Specialties	1.18182	3	1	1	1	1	1	2	1.42857	3	3	3	3	3	2	2	2.71429	1.77489	1	2	2	1	1	1	3	3	4	10	8	18	1	2	1	2	1	2	4	3	4	11	9	20
581	2021-12-01	Second Year	female	13	8-10h/d	High school and blow	High school and blow	1.04545	5	2	2	1	4	3	1	2.57143	1	1	1	1	1	1	1	1	1.53896	3	3	3	3	3	3	2	2	2	6	18	24	3	3	3	3	3	3	2	2	2	6	18	24
582	2021-12-01	Second Year	female	13	6-8h/d	Specialties	Specialties	1.27273	5	2	1	4	5	2	2	3	2	2	3	2	4	1	1	2.14286	2.13853	2	4	2	2	4	3	3	2	2	7	17	24	3	3	3	4	2	2	1	3	3	7	17	24
583	2021-12-01	Second Year	female	13	6-8h/d	Specialties	Specialties	1.27273	4	1	1	1	1	3	4	2.14286	5	4	5	4	5	2	2	3.85714	2.42424	4	4	4	4	4	4	1	1	1	3	24	27	3	3	3	3	3	3	2	2	2	6	18	24
584	2021-12-01	Second Year	male	13	8-10h/d	Specialties	Specialties	1.72727	2	3	2	4	5	4	2	3.14286	2	3	3	2	3	2	3	2.57143	2.48052	2	3	2	2	2	2	3	3	3	9	13	22	2	3	3	3	3	3	2	2	2	6	17	23
585	2021-12-01	Second Year	female	13	8-10h/d	Specialties	Specialties	1.18182	3	1	1	1	1	1	2	1.42857	3	3	3	3	3	3	3	3	1.87013	2	1	2	3	2	1	3	2	3	8	11	19	2	1	2	3	2	1	2	3	1	6	11	17
586	2021-12-01	Second Year	male	13	8-10h/d	Specialties	Specialties	1.5	2	2	2	2	3	3	2	2.28571	2	2	2	2	2	2	2	2	1.92857	3	3	2	3	3	1	3	3	3	9	15	24	2	2	2	1	1	2	4	4	4	12	10	22
587	2021-12-01	Second Year	male	13	6-8h/d	Specialties	Specialties	1.31818	4	2	2	1	1	1	2	1.85714	1	1	1	1	1	1	1	1	1.39177	3	3	3	3	3	3	3	3	3	9	18	27	3	3	3	3	3	3	3	3	3	9	18	27
588	2021-12-01	Second Year	male	13	＜6h/d	High school and blow	High school and blow	3	5	2	2	4	5	5	5	4	4	4	4	4	4	5	5	4.28571	3.7619	1	1	1	1	1	1	4	4	4	12	6	18	1	1	1	1	1	1	4	4	4	12	6	18
589	2021-12-01	Second Year	male	13	6-8h/d	Specialties	Specialties	3.72727	3	2	2	3	3	3	3	2.71429	5	5	5	5	5	5	5	5	3.81385	1	1	1	1	1	1	4	4	4	12	6	18	1	1	1	1	1	1	4	4	4	12	6	18
590	2021-12-01	Second Year	male	13	8-10h/d	Undergraduate	Undergraduate	3.27273	3	2	2	4	4	4	3	3.14286	2	3	4	2	2	4	4	3	3.13853	3	3	3	3	3	3	2	2	2	6	18	24	3	3	3	3	3	3	2	2	2	6	18	24
591	2021-12-01	Second Year	male	12	8-10h/d	High school and blow	High school and blow	1.77273	3	1	1	1	1	1	2	1.42857	2	3	2	2	2	1	2	2	1.73377	3	3	3	3	3	3	3	3	3	9	18	27	3	3	3	3	3	3	2	2	2	6	18	24
592	2021-12-01	Second Year	male	13	6-8h/d	Specialties	Specialties	3.59091	3	1	1	1	1	1	3	1.57143	5	5	5	5	5	5	5	5	3.38745	4	3	3	3	3	3	2	2	1	5	19	24	3	3	3	3	3	3	2	2	2	6	18	24
593	2021-12-01	Second Year	female	13	8-10h/d	Specialties	Specialties	1.63636	1	1	4	1	3	2	2	2	1	2	1	3	1	4	5	2.42857	2.02165	1	1	1	1	1	1	4	4	4	12	6	18	1	1	1	1	1	1	4	4	4	12	6	18
594	2021-12-01	Second Year	male	13	8-10h/d	Specialties	Specialties	1.5	3	1	1	1	1	1	2	1.42857	1	1	2	1	4	1	1	1.57143	1.5	2	2	2	3	2	1	2	3	3	8	12	20	4	4	4	2	2	2	1	3	3	7	18	25
595	2021-12-01	Second Year	female	13	6-8h/d	High school and blow	High school and blow	1.5	4	1	2	1	5	5	5	3.28571	5	5	5	5	5	5	3	4.71429	3.16667	2	2	2	2	3	2	3	3	3	9	13	22	2	2	2	2	3	2	3	3	3	9	13	22
596	2021-12-01	Second Year	male	13	8-10h/d	High school and blow	High school and blow	3.18182	5	5	5	5	2	3	4	4.14286	3	3	3	3	3	3	3	3	3.44156	3	3	3	3	3	3	2	2	2	6	18	24	4	4	4	4	4	4	1	1	1	3	24	27
597	2021-12-01	Second Year	male	13	＜6h/d	Specialties	Specialties	1.36364	3	1	1	1	1	1	2	1.42857	1	1	1	1	1	1	1	1	1.26407	3	3	3	3	3	3	3	3	3	9	18	27	3	3	3	3	3	3	3	3	3	9	18	27
598	2021-12-01	Second Year	male	13	8-10h/d	High school and blow	High school and blow	2.63636	3	4	1	1	1	1	2	1.85714	4	4	4	4	4	4	4	4	2.83117	3	3	3	3	3	3	3	3	3	9	18	27	3	3	3	3	3	3	2	2	2	6	18	24
599	2021-12-01	Second Year	female	13	6-8h/d	High school and blow	Specialties	1	1	1	1	1	1	1	1	1	1	1	1	1	1	1	1	1	1	3	3	3	3	3	3	3	3	3	9	18	27	3	3	3	3	3	3	3	3	3	9	18	27
600	2021-12-01	Second Year	male	13	＞10h/d	High school and blow	High school and blow	1	1	1	1	1	1	1	1	1	1	1	1	1	1	1	1	1	1	3	3	3	3	3	3	3	3	3	9	18	27	3	3	3	3	3	3	3	3	3	9	18	27
601	2021-12-01	Second Year	female	13	6-8h/d	High school and blow	High school and blow	1.72727	5	2	2	1	1	5	2	2.57143	2	2	2	2	1	1	1	1.57143	1.95671	3	3	3	3	3	3	3	3	3	9	18	27	3	3	3	3	3	3	3	3	3	9	18	27
602	2021-12-01	Second Year	female	13	6-8h/d	High school and blow	High school and blow	1	1	1	1	1	1	1	1	1	1	1	1	1	1	1	1	1	1	2	2	2	2	2	2	2	2	2	6	12	18	2	2	2	2	2	2	2	2	2	6	12	18
603	2021-12-01	Second Year	female	13	6-8h/d	Specialties	Specialties	1	1	1	1	1	1	1	1	1	1	1	1	1	1	1	1	1	1	3	3	3	3	3	3	3	3	3	9	18	27	3	3	3	3	3	3	3	3	3	9	18	27
604	2021-12-01	Second Year	female	13	6-8h/d	High school and blow	High school and blow	1.40909	3	2	2	4	3	4	5	3.28571	1	1	1	1	1	1	1	1	1.89827	3	3	3	3	3	3	3	3	3	9	18	27	3	3	3	3	3	3	3	3	3	9	18	27
605	2021-12-01	Second Year	male	13	8-10h/d	Specialties	Specialties	1.18182	1	2	1	1	1	1	2	1.28571	1	1	1	2	1	1	1	1.14286	1.20346	2	2	2	2	4	2	4	4	4	12	14	26	2	2	2	2	4	2	4	4	4	12	14	26
606	2021-12-01	Second Year	female	13	6-8h/d	High school and blow	High school and blow	3.72727	5	1	1	5	5	5	3	3.57143	5	5	5	5	5	4	5	4.85714	4.05195	4	4	4	4	4	4	2	2	2	6	24	30	4	4	4	4	4	4	1	1	1	3	24	27
607	2021-12-01	Second Year	female	12	＜6h/d	High school and blow	High school and blow	1.77273	3	2	1	1	1	3	4	2.14286	2	1	2	2	2	5	5	2.71429	2.20996	2	2	2	2	2	2	3	3	3	9	12	21	3	3	3	3	3	3	2	2	2	6	18	24
608	2021-12-01	Second Year	female	13	6-8h/d	High school and blow	High school and blow	1.04545	3	1	1	1	1	1	2	1.42857	2	2	1	1	1	1	1	1.28571	1.25325	3	3	3	3	3	3	3	3	3	9	18	27	2	3	1	2	3	2	3	3	3	9	13	22
609	2021-12-01	Second Year	female	12	8-10h/d	Specialties	Specialties	1.77273	1	2	3	1	1	1	1	1.42857	2	2	2	1	1	2	2	1.71429	1.63853	3	3	3	3	3	3	3	3	3	9	18	27	3	3	3	3	3	3	2	2	2	6	18	24
610	2021-12-01	Second Year	female	13	＜6h/d	High school and blow	High school and blow	1.04545	3	1	1	1	1	1	2	1.42857	2	2	2	1	1	1	2	1.57143	1.34848	3	3	3	3	3	3	3	3	3	9	18	27	3	3	3	2	2	2	2	2	2	6	15	21
611	2021-12-01	Second Year	male	13	8-10h/d	High school and blow	High school and blow	1.59091	4	3	3	4	4	4	3	3.57143	3	3	3	3	3	3	3	3	2.72078	3	3	3	3	3	3	3	3	3	9	18	27	3	3	3	3	3	3	3	3	3	9	18	27
612	2021-12-01	Second Year	male	13	＜6h/d	Specialties	Specialties	1.31818	3	1	1	1	1	2	2	1.57143	2	2	2	3	1	1	1	1.71429	1.53463	3	3	3	3	3	2	2	2	3	7	17	24	3	3	3	3	3	3	3	3	3	9	18	27
613	2021-12-01	Second Year	female	12	8-10h/d	High school and blow	High school and blow	1.04545	3	1	1	1	1	1	2	1.42857	2	2	1	1	1	2	1	1.42857	1.30087	3	3	3	3	3	3	3	3	3	9	18	27	3	3	3	3	3	3	3	3	3	9	18	27
614	2021-12-01	Second Year	female	12	6-8h/d	Specialties	Specialties	1	3	1	1	1	1	1	1	1.28571	2	2	1	1	1	1	1	1.28571	1.19048	2	2	2	2	2	2	2	2	2	6	12	18	3	3	3	3	3	3	3	3	3	9	18	27
615	2021-12-01	Second Year	male	13	8-10h/d	High school and blow	High school and blow	1	3	1	1	1	1	1	2	1.42857	2	2	2	2	2	2	1	1.85714	1.42857	3	3	3	3	3	3	3	3	3	9	18	27	3	3	3	3	3	3	3	3	3	9	18	27
616	2021-12-01	Second Year	female	12	6-8h/d	High school and blow	High school and blow	1	3	1	1	1	1	1	2	1.42857	2	2	1	1	2	2	1	1.57143	1.33333	2	2	2	2	2	2	2	2	2	6	12	18	2	2	2	2	2	2	2	2	2	6	12	18
617	2021-12-01	Second Year	male	13	8-10h/d	Specialties	Specialties	1.27273	3	1	1	1	1	2	2	1.57143	2	2	1	1	1	2	3	1.71429	1.51948	3	3	3	3	3	3	3	3	3	9	18	27	3	3	3	3	3	3	3	3	3	9	18	27
618	2021-12-01	Second Year	female	13	6-8h/d	High school and blow	High school and blow	1.09091	3	1	1	1	1	1	2	1.42857	2	2	1	1	1	2	1	1.42857	1.31602	4	4	4	4	4	4	4	4	4	12	24	36	3	3	3	3	3	3	3	3	3	9	18	27
619	2021-12-01	Second Year	male	13	8-10h/d	Undergraduate	Undergraduate	1.22727	3	2	2	1	1	2	2	1.85714	2	3	3	3	1	1	1	2	1.69481	3	3	3	3	3	3	3	3	3	9	18	27	2	2	2	2	2	2	2	2	2	6	12	18
620	2021-12-01	Second Year	male	13	6-8h/d	Specialties	Specialties	1.36364	3	2	2	1	2	2	2	2	4	4	4	4	3	3	4	3.71429	2.35931	3	3	3	3	3	3	3	3	3	9	18	27	3	3	3	3	3	3	3	3	3	9	18	27
621	2021-12-01	Second Year	male	13	＜6h/d	High school and blow	High school and blow	1.09091	3	2	2	1	1	1	2	1.71429	2	2	2	2	1	2	2	1.85714	1.55411	2	2	2	2	2	2	2	2	2	6	12	18	2	2	2	2	2	2	2	2	2	6	12	18
622	2021-12-23	Second Year	female	13	＜6h/d	High school and blow	High school and blow	1.81818	4	1	1	1	2	4	2	2.14286	3	2	1	3	4	1	1	2.14286	2.03463	2	3	3	2	2	3	4	3	3	10	15	25	1	1	1	1	1	1	2	2	3	7	6	13
623	2021-12-23	Second Year	female	13	8-10h/d	Postgraduate and above	High school and blow	1.81818	5	2	2	1	1	3	3	2.42857	1	1	1	1	1	1	1	1	1.74892	3	1	1	1	4	1	4	4	4	12	11	23	1	1	1	1	4	1	4	4	4	12	9	21
624	2021-12-23	Second Year	male	13	8-10h/d	High school and blow	High school and blow	1.86364	5	5	5	5	1	3	3	3.85714	4	4	4	4	3	4	4	3.85714	3.19264	2	2	3	3	3	2	4	4	4	12	15	27	2	2	3	3	3	2	4	4	4	12	15	27
625	2021-12-23	Second Year	female	15	6-8h/d	High school and blow	High school and blow	1.86364	5	3	4	4	1	3	4	3.42857	3	3	3	3	3	3	3	3	2.76407	3	3	3	3	2	3	3	2	4	9	17	26	4	3	3	3	3	3	2	3	4	9	19	28
626	2021-12-23	Second Year	female	13	6-8h/d	High school and blow	High school and blow	1.45455	3	1	4	2	2	3	2	2.42857	2	2	1	2	2	2	2	1.85714	1.91342	2	3	3	1	1	1	2	4	4	10	11	21	3	1	1	2	2	3	2	2	2	6	12	18
627	2021-12-23	Second Year	female	13	6-8h/d	High school and blow	High school and blow	1.27273	3	4	2	1	1	1	2	2	2	2	2	2	2	1	1	1.71429	1.66234	3	1	1	1	1	4	4	4	4	12	11	23	3	1	1	1	1	3	4	4	4	12	10	22
628	2021-12-23	Second Year	female	13	6-8h/d	High school and blow	High school and blow	1.27273	3	1	1	1	1	2	2	1.57143	2	3	2	3	2	3	2	2.42857	1.75758	3	3	3	3	3	3	2	2	2	6	18	24	3	3	3	3	3	3	2	2	2	6	18	24
629	2021-12-23	Second Year	female	13	6-8h/d	High school and blow	High school and blow	1.63636	4	1	5	1	2	4	2	2.71429	4	4	1	1	1	4	1	2.28571	2.21212	4	4	4	4	4	4	1	1	1	3	24	27	4	4	4	4	4	4	1	1	1	3	24	27
630	2021-12-23	Second Year	male	14	6-8h/d	High school and blow	High school and blow	2.90909	4	4	4	5	5	5	4	4.42857	2	2	2	2	2	2	2	2	3.11255	4	3	2	1	2	3	1	2	3	6	15	21	1	2	3	4	3	2	4	3	2	9	15	24
631	2021-12-23	Second Year	male	13	＜6h/d	High school and blow	High school and blow	1.09091	4	2	2	2	1	1	2	2	2	3	2	3	2	3	2	2.42857	1.83983	3	4	4	4	4	4	1	1	1	3	23	26	4	4	4	4	4	4	1	1	1	3	24	27
632	2021-12-23	Second Year	female	13	6-8h/d	Undergraduate	Specialties	1.63636	3	1	1	2	2	3	2	2	2	2	2	2	2	2	2	2	1.87879	2	2	3	3	3	2	3	2	3	8	15	23	1	2	1	3	2	2	4	4	4	12	11	23
633	2021-12-23	Second Year	female	13	8-10h/d	Specialties	Specialties	1.18182	3	2	2	2	1	2	2	2	2	2	1	1	1	2	1	1.42857	1.5368	3	3	3	3	3	3	3	3	3	9	18	27	3	3	3	3	3	3	2	2	2	6	18	24
634	2021-12-23	Second Year	male	13	6-8h/d	High school and blow	High school and blow	1.36364	5	3	3	3	2	5	4	3.57143	4	4	4	4	4	4	4	4	2.97835	3	3	3	3	3	3	2	2	2	6	18	24	3	3	3	3	3	3	2	2	2	6	18	24
635	2021-12-23	Second Year	female	13	6-8h/d	Undergraduate	Undergraduate	1.13636	3	1	1	1	4	2	4	2.28571	5	5	5	5	5	2	5	4.57143	2.6645	2	3	3	3	3	2	3	3	2	8	16	24	2	2	2	2	2	2	3	3	3	9	12	21
636	2021-12-23	Second Year	female	13	8-10h/d	Specialties	Specialties	1.18182	3	2	2	3	4	2	3	2.71429	3	3	3	3	3	3	3	3	2.2987	1	3	3	2	3	3	1	3	3	7	15	22	3	1	3	3	2	3	2	1	3	6	15	21
637	2021-12-23	Second Year	male	14	8-10h/d	High school and blow	High school and blow	2.13636	5	2	3	3	3	5	3	3.42857	4	4	4	4	4	3	3	3.71429	3.09307	4	3	3	3	4	3	2	3	3	8	20	28	4	3	3	3	4	3	3	3	3	9	20	29
638	2021-12-23	Second Year	female	13	6-8h/d	Undergraduate	Undergraduate	1.68182	4	3	1	3	4	3	3	3	2	2	2	2	2	2	2	2	2.22727	3	4	4	3	4	4	1	1	1	3	22	25	3	3	3	3	3	4	2	1	2	5	19	24
639	2021-12-23	Second Year	male	13	8-10h/d	High school and blow	High school and blow	1.86364	5	1	5	3	1	3	3	3	1	2	3	4	4	3	2	2.71429	2.52597	3	3	3	3	3	3	4	4	4	12	18	30	3	3	3	3	3	3	4	4	4	12	18	30
640	2021-12-23	Second Year	female	13	6-8h/d	High school and blow	High school and blow	1.95455	5	5	1	1	1	4	3	2.85714	2	2	1	3	3	4	4	2.71429	2.50866	2	2	2	2	2	2	2	2	2	6	12	18	2	2	2	3	2	2	3	2	2	7	13	20
641	2021-12-23	Second Year	female	14	6-8h/d	Specialties	Specialties	1.40909	3	1	1	1	1	3	2	1.71429	1	1	1	1	3	3	3	1.85714	1.66017	3	3	3	3	3	3	2	2	2	6	18	24	3	3	3	3	3	3	2	2	2	6	18	24
642	2021-12-23	Second Year	female	14	6-8h/d	High school and blow	High school and blow	1.95455	5	3	1	2	2	2	1	2.28571	5	5	5	5	5	4	3	4.57143	2.93723	2	2	2	2	2	3	4	4	4	12	13	25	2	2	2	2	2	1	4	4	4	12	11	23
643	2021-12-23	Second Year	male	13	8-10h/d	High school and blow	High school and blow	1	3	1	1	1	1	1	3	1.57143	4	4	4	4	4	4	4	4	2.19048	3	3	3	3	3	3	3	3	3	9	18	27	3	4	3	3	3	3	3	3	3	9	19	28
644	2021-12-23	Second Year	male	12	6-8h/d	High school and blow	High school and blow	1.63636	3	3	2	3	3	2	4	2.85714	2	2	3	3	3	1	1	2.14286	2.21212	3	1	3	3	3	3	2	2	2	6	16	22	3	1	3	3	1	3	2	2	2	6	14	20
645	2021-12-23	Second Year	male	14	6-8h/d	Undergraduate	High school and blow	2.5	5	4	1	2	3	5	5	3.57143	4	4	4	4	4	4	4	4	3.35714	1	2	4	3	4	4	2	4	4	10	18	28	2	2	2	2	2	2	2	2	2	6	12	18
646	2021-12-23	Second Year	male	14	6-8h/d	High school and blow	High school and blow	1.5	4	5	5	2	1	2	2	3	1	1	1	1	1	1	1	1	1.83333	3	2	3	2	3	2	2	3	3	8	15	23	3	3	3	3	3	2	3	3	2	8	17	25
647	2021-12-23	Second Year	male	14	8-10h/d	Undergraduate	Undergraduate	1.36364	4	2	3	1	1	3	2	2.28571	2	2	2	2	2	1	1	1.71429	1.78788	3	3	3	3	3	3	2	3	3	8	18	26	3	3	3	3	3	3	2	2	3	7	18	25
648	2021-12-23	Second Year	female	14	8-10h/d	High school and blow	High school and blow	1.5	3	2	2	4	3	3	2	2.71429	2	2	3	3	2	2	2	2.28571	2.16667	3	3	3	3	3	3	2	2	2	6	18	24	3	3	3	3	3	3	2	2	2	6	18	24
649	2021-12-23	Second Year	female	13	6-8h/d	High school and blow	High school and blow	2.04545	4	2	2	1	3	5	2	2.71429	3	3	3	3	2	3	3	2.85714	2.53896	4	3	4	2	3	2	1	3	3	7	18	25	3	3	3	3	3	4	2	2	2	6	19	25
650	2021-12-23	Second Year	male	14	8-10h/d	High school and blow	High school and blow	1.90909	4	1	1	3	2	4	3	2.57143	5	5	5	5	5	5	2	4.57143	3.01732	3	3	3	3	3	3	2	2	2	6	18	24	3	3	3	3	3	3	2	2	2	6	18	24
651	2021-12-23	Second Year	male	14	8-10h/d	High school and blow	High school and blow	1.72727	4	4	3	2	2	3	3	3	2	2	3	2	2	4	3	2.57143	2.4329	3	3	3	3	3	3	4	3	3	10	18	28	3	3	3	4	3	2	3	4	4	11	18	29
652	2021-12-23	Second Year	female	13	6-8h/d	High school and blow	High school and blow	1.18182	5	4	1	2	1	2	1	2.28571	1	1	1	1	1	3	3	1.57143	1.67965	3	3	3	3	3	3	3	3	3	9	18	27	3	3	3	3	3	3	3	3	3	9	18	27
653	2021-12-23	Second Year	female	13	6-8h/d	High school and blow	High school and blow	1.04545	4	1	1	1	1	1	1	1.42857	1	1	1	1	1	1	1	1	1.15801	3	2	2	2	3	2	3	3	2	8	14	22	3	3	2	2	2	2	3	3	2	8	14	22
654	2021-12-23	Second Year	male	14	6-8h/d	High school and blow	High school and blow	2.36364	3	5	1	1	1	3	5	2.71429	3	3	1	4	2	3	2	2.57143	2.54978	3	3	3	3	3	3	3	3	3	9	18	27	3	3	3	3	3	3	3	3	3	9	18	27
655	2021-12-23	Second Year	female	14	6-8h/d	High school and blow	Undergraduate	1.86364	5	2	3	1	1	3	4	2.71429	2	2	2	2	2	2	2	2	2.19264	2	3	2	1	1	4	3	3	3	9	13	22	2	2	2	2	2	2	2	3	3	8	12	20
656	2021-12-23	Second Year	male	14	6-8h/d	High school and blow	High school and blow	1.54545	3	4	4	5	5	5	4	4.28571	4	4	4	4	4	2	2	3.42857	3.08658	3	3	3	3	3	3	3	3	3	9	18	27	3	3	3	3	3	3	3	3	3	9	18	27
657	2021-12-23	Second Year	male	14	6-8h/d	High school and blow	High school and blow	1.90909	3	2	2	2	1	2	2	2	4	4	4	4	4	2	2	3.42857	2.44589	3	3	3	3	3	3	2	3	2	7	18	25	2	3	2	3	2	3	3	2	2	7	15	22
658	2021-12-23	Second Year	female	14	8-10h/d	High school and blow	High school and blow	1.72727	4	2	3	2	2	3	2	2.57143	2	2	2	2	2	5	5	2.85714	2.38528	3	3	3	4	4	4	1	1	1	3	21	24	3	3	3	3	3	3	2	2	2	6	18	24
659	2021-12-23	Second Year	male	14	6-8h/d	High school and blow	High school and blow	1.18182	3	2	2	1	1	1	2	1.71429	1	1	2	2	1	1	1	1.28571	1.39394	3	3	3	3	3	3	2	2	2	6	18	24	3	3	3	3	3	3	2	2	2	6	18	24
660	2021-12-23	Second Year	male	13	6-8h/d	High school and blow	High school and blow	1.27273	4	2	2	2	1	2	2	2.14286	2	2	1	2	2	1	2	1.71429	1.70996	3	3	3	3	3	3	2	2	2	6	18	24	3	3	3	3	3	3	1	1	1	3	18	21
661	2021-12-23	Second Year	female	14	＜6h/d	High school and blow	High school and blow	1.04545	4	1	2	1	1	2	2	1.85714	1	1	1	1	1	1	1	1	1.30087	3	2	4	1	1	1	2	2	4	8	12	20	1	1	1	1	1	1	4	4	4	12	6	18
662	2021-12-23	Second Year	male	14	6-8h/d	High school and blow	High school and blow	1.72727	5	2	5	1	5	5	5	4	1	1	2	1	1	1	1	1.14286	2.29004	3	3	2	2	3	2	3	3	3	9	15	24	3	3	3	3	3	3	4	3	3	10	18	28
663	2021-12-23	Second Year	male	14	6-8h/d	Specialties	High school and blow	1.31818	4	3	1	2	2	2	3	2.42857	2	2	2	2	2	2	2	2	1.91558	3	3	2	3	3	3	3	3	3	9	17	26	2	2	2	2	3	3	3	3	3	9	14	23
664	2021-12-23	Second Year	female	14	＜6h/d	High school and blow	High school and blow	1.22727	5	1	2	1	1	4	3	2.42857	3	3	3	3	3	1	1	2.42857	2.02814	2	2	2	3	3	3	4	3	4	11	15	26	4	2	2	2	2	2	2	3	4	9	14	23
665	2021-12-23	Second Year	male	14	6-8h/d	Specialties	Specialties	1.40909	5	2	5	1	3	3	5	3.42857	5	5	4	3	5	5	5	4.57143	3.13636	3	2	2	1	2	1	3	3	3	9	11	20	1	1	3	2	2	1	3	3	3	9	10	19
666	2021-12-23	Second Year	female	13	6-8h/d	Postgraduate and above	Postgraduate and above	1.54545	4	2	3	1	2	3	1	2.28571	1	1	2	1	1	1	1	1.14286	1.65801	2	2	2	3	3	2	2	2	2	6	14	20	3	2	2	2	2	2	3	3	3	9	13	22
667	2021-12-23	Second Year	male	14	＜6h/d	Undergraduate	Postgraduate and above	1.54545	5	2	2	1	1	5	4	2.85714	3	3	3	3	3	4	3	3.14286	2.51515	3	2	2	3	3	3	3	4	4	11	16	27	3	3	3	2	3	2	3	2	4	9	16	25
668	2021-12-23	Second Year	male	13	6-8h/d	Undergraduate	Undergraduate	1.27273	4	1	2	2	1	4	4	2.57143	4	4	4	4	4	4	4	4	2.61472	3	3	2	2	3	3	2	3	3	8	16	24	3	3	3	2	3	3	2	3	3	8	17	25
669	2021-12-23	Second Year	female	14	6-8h/d	Specialties	Specialties	1.36364	3	2	2	1	1	1	2	1.71429	3	3	3	1	3	1	1	2.14286	1.74026	1	1	1	1	1	1	3	3	3	9	6	15	1	1	1	1	1	1	4	4	4	12	6	18
670	2021-12-23	Second Year	female	14	6-8h/d	High school and blow	Specialties	1.36364	4	1	1	1	1	4	3	2.14286	2	2	2	2	2	1	1	1.71429	1.74026	3	2	1	1	2	2	2	1	2	5	11	16	3	2	2	2	2	1	2	2	2	6	12	18
671	2021-12-23	Second Year	female	14	6-8h/d	High school and blow	High school and blow	1.63636	5	4	4	2	1	5	3	3.42857	1	1	3	1	1	3	3	1.85714	2.30736	2	2	2	2	2	2	3	3	3	9	12	21	2	2	2	2	2	2	3	3	3	9	12	21
672	2021-12-23	Second Year	female	13	6-8h/d	High school and blow	High school and blow	1.13636	5	1	2	5	4	5	3	3.57143	5	5	5	5	5	5	5	5	3.23593	3	3	4	3	2	3	1	2	1	4	18	22	3	3	3	3	3	3	2	2	2	6	18	24
673	2021-12-23	Second Year	female	13	6-8h/d	Specialties	High school and blow	1.22727	5	1	1	1	1	4	2	2.14286	4	4	4	4	4	1	1	3.14286	2.171	2	3	3	3	2	2	3	3	3	9	15	24	2	3	3	3	3	2	3	3	3	9	16	25
674	2021-12-23	Second Year	female	13	6-8h/d	High school and blow	High school and blow	1.54545	5	1	1	1	3	5	5	3	3	3	3	3	3	3	3	3	2.51515	3	3	3	3	3	3	4	4	4	12	18	30	3	3	3	3	3	3	4	4	4	12	18	30
675	2021-12-23	Second Year	female	14	6-8h/d	High school and blow	High school and blow	1.5	5	1	2	2	3	5	4	3.14286	2	2	2	2	2	1	2	1.85714	2.16667	3	3	3	2	2	3	3	3	3	9	16	25	3	3	3	2	2	2	3	3	3	9	15	24
676	2021-12-23	Second Year	male	13	＜6h/d	High school and blow	High school and blow	1.27273	4	2	2	1	1	1	2	1.85714	1	1	1	1	1	1	1	1	1.37662	3	3	3	3	2	4	4	4	4	12	18	30	3	3	3	3	2	4	4	4	4	12	18	30
677	2021-12-23	Second Year	male	14	＞10h/d	Undergraduate	Undergraduate	1.72727	4	2	3	2	1	2	1	2.14286	2	2	2	1	2	1	1	1.57143	1.81385	1	1	1	1	3	1	4	4	3	11	8	19	1	1	1	1	1	1	4	4	3	11	6	17
678	2021-12-23	Second Year	male	13	6-8h/d	High school and blow	High school and blow	1.72727	5	2	1	3	1	5	4	3	5	5	5	5	5	4	3	4.57143	3.09957	3	3	3	2	1	3	4	4	4	12	15	27	3	3	3	2	1	3	4	4	4	12	15	27
679	2021-12-23	Second Year	female	14	6-8h/d	High school and blow	High school and blow	1.40909	5	1	1	1	1	3	1	1.85714	4	4	4	4	4	2	2	3.42857	2.2316	2	2	2	2	2	3	3	4	2	9	13	22	4	3	3	2	2	3	3	4	4	11	17	28
680	2021-12-23	Second Year	male	13	6-8h/d	High school and blow	High school and blow	1.31818	5	1	3	1	5	3	5	3.28571	4	4	4	4	4	4	4	4	2.86797	3	3	3	2	2	3	3	3	3	9	16	25	2	2	2	2	2	2	3	3	3	9	12	21
681	2021-12-23	Second Year	male	14	8-10h/d	Specialties	Specialties	2.22727	5	1	5	2	1	4	2	2.85714	1	1	1	1	4	5	5	2.57143	2.55195	2	2	2	2	2	2	4	3	4	11	12	23	2	3	3	3	3	3	4	4	4	12	17	29
682	2021-12-23	Second Year	male	13	6-8h/d	High school and blow	High school and blow	1.27273	3	3	3	3	3	3	3	3	1	1	1	1	1	4	4	1.85714	2.04329	4	4	4	3	3	1	4	4	4	12	19	31	4	4	4	3	3	1	4	4	4	12	19	31
683	2021-12-23	Second Year	female	14	6-8h/d	High school and blow	High school and blow	1.45455	5	1	1	1	2	5	5	2.85714	5	5	5	5	5	2	2	4.14286	2.81818	1	3	1	1	1	3	3	3	3	9	10	19	4	4	2	4	2	4	4	4	4	12	20	32
684	2021-12-23	Second Year	female	13	＜6h/d	Specialties	Specialties	2.18182	1	1	2	3	2	3	3	2.14286	2	2	2	2	2	2	2	2	2.10823	3	3	3	3	3	2	2	3	3	8	17	25	3	3	3	3	3	2	2	3	3	8	17	25
685	2021-12-23	Second Year	female	13	6-8h/d	Undergraduate	Undergraduate	1.77273	5	1	3	3	3	3	3	3	4	4	4	4	4	4	4	4	2.92424	2	4	3	3	3	3	2	2	3	7	18	25	2	2	3	3	3	3	2	2	2	6	16	22
686	2021-12-23	Second Year	female	13	6-8h/d	Specialties	Specialties	1.36364	3	2	4	1	1	5	4	2.85714	5	5	5	5	5	5	5	5	3.07359	3	3	3	3	3	3	3	3	3	9	18	27	3	3	3	3	3	3	3	3	3	9	18	27
687	2021-12-23	Second Year	female	13	6-8h/d	High school and blow	High school and blow	1.18182	5	1	1	1	1	2	1	1.71429	3	3	3	3	3	1	1	2.42857	1.77489	3	3	3	2	3	3	4	4	4	12	17	29	1	1	1	1	3	1	4	4	4	12	8	20
688	2021-12-23	Second Year	female	14	8-10h/d	High school and blow	High school and blow	2.27273	5	1	1	3	2	4	4	2.85714	1	1	1	1	1	4	4	1.85714	2.329	3	3	3	3	3	3	3	2	3	8	18	26	3	3	3	3	3	3	3	2	3	8	18	26
689	2021-12-23	Second Year	male	14	8-10h/d	Specialties	Specialties	1.77273	5	2	2	2	2	3	3	2.71429	3	3	3	3	3	3	3	3	2.49567	3	3	3	3	3	3	3	3	3	9	18	27	3	3	3	3	3	3	2	2	2	6	18	24
690	2021-12-23	Second Year	female	13	6-8h/d	High school and blow	High school and blow	1.36364	5	1	1	1	1	4	1	2	1	1	5	1	1	1	1	1.57143	1.64502	4	2	4	2	3	2	3	3	3	9	17	26	2	2	2	2	2	2	3	3	3	9	12	21
691	2021-12-23	Second Year	female	13	6-8h/d	Undergraduate	Undergraduate	1.22727	5	1	3	1	1	4	4	2.71429	1	1	1	1	1	1	1	1	1.64719	3	3	2	2	2	2	3	3	3	9	14	23	2	2	2	2	2	3	3	3	4	10	13	23
692	2021-12-23	Second Year	female	13	8-10h/d	Specialties	Undergraduate	1.09091	3	2	2	2	1	1	2	1.85714	1	2	2	2	1	1	1	1.42857	1.45887	1	1	1	1	1	1	1	1	1	3	6	9	1	1	1	1	1	1	4	1	1	6	6	12
693	2021-12-23	Second Year	male	13	6-8h/d	High school and blow	High school and blow	2.13636	5	2	1	2	1	4	2	2.42857	3	3	3	3	3	3	3	3	2.52165	3	3	3	3	3	3	3	3	3	9	18	27	3	3	3	2	2	3	3	3	3	9	16	25
694	2021-12-23	Second Year	female	14	8-10h/d	High school and blow	High school and blow	2.36364	4	4	4	4	4	4	4	4	3	3	3	3	3	3	3	3	3.12121	3	3	3	3	3	3	3	3	3	9	18	27	3	3	3	2	2	3	3	3	3	9	16	25
695	2021-12-23	Second Year	female	14	6-8h/d	High school and blow	Specialties	1.45455	5	2	1	2	4	5	4	3.28571	4	4	4	2	4	5	4	3.85714	2.8658	3	2	3	2	4	3	4	4	4	12	17	29	3	2	2	2	3	2	3	3	3	9	14	23
696	2021-12-23	Second Year	male	13	8-10h/d	High school and blow	High school and blow	1.90909	5	1	1	1	1	3	1	1.85714	1	2	3	4	1	1	1	1.85714	1.87446	1	1	1	1	3	1	4	4	4	12	8	20	3	3	3	1	1	1	4	4	4	12	12	24
697	2021-12-23	Second Year	male	14	8-10h/d	High school and blow	High school and blow	1.77273	3	5	1	1	1	4	2	2.42857	1	2	2	1	2	4	3	2.14286	2.11472	2	3	3	3	3	3	2	3	2	7	17	24	3	3	3	3	3	3	2	3	3	8	18	26
698	2021-12-23	Second Year	female	15	6-8h/d	High school and blow	High school and blow	1.95455	5	3	4	4	3	4	3	3.71429	2	1	2	3	1	3	4	2.28571	2.65152	3	3	2	3	2	2	2	2	2	6	15	21	3	2	2	3	3	3	2	2	2	6	16	22
699	2021-12-23	Second Year	female	13	＜6h/d	High school and blow	High school and blow	2.68182	4	3	2	3	4	3	2	3	1	2	3	2	3	2	4	2.42857	2.70346	3	4	3	3	3	3	2	2	2	6	19	25	3	4	3	3	3	4	2	2	1	5	20	25
700	2021-12-23	Second Year	female	14	＜6h/d	Undergraduate	Specialties	2.09091	3	3	2	2	3	3	2	2.57143	1	2	2	3	1	4	2	2.14286	2.2684	4	3	3	4	4	3	2	2	2	6	21	27	3	3	4	4	3	3	1	1	2	4	20	24
701	2021-12-23	Second Year	female	13	6-8h/d	Undergraduate	Undergraduate	1.45455	4	2	1	1	1	3	3	2.14286	1	1	2	2	2	2	1	1.57143	1.72294	2	3	2	3	2	3	2	3	3	8	15	23	3	3	3	3	3	3	3	3	3	9	18	27
702	2021-12-23	Second Year	male	14	8-10h/d	High school and blow	Specialties	1.45455	4	2	1	1	4	4	5	3	2	2	2	3	3	5	5	3.14286	2.53247	3	2	2	2	2	3	2	1	1	4	14	18	3	2	2	2	2	4	1	1	1	3	15	18
703	2021-12-23	Second Year	female	13	6-8h/d	Postgraduate and above	Undergraduate	2.09091	4	2	2	3	1	4	1	2.42857	3	1	1	1	1	2	1	1.42857	1.98268	4	3	2	4	3	3	2	3	4	9	19	28	4	4	4	4	1	4	4	4	4	12	21	33
704	2021-12-23	Second Year	female	13	6-8h/d	High school and blow	High school and blow	2.86364	5	2	2	3	4	5	4	3.57143	3	3	3	3	3	3	3	3	3.14502	4	3	4	4	4	4	3	3	3	9	23	32	3	4	4	4	4	3	3	3	3	9	22	31
705	2021-12-23	Second Year	female	14	8-10h/d	High school and blow	High school and blow	1.54545	4	5	5	1	1	1	2	2.71429	1	1	1	1	1	1	1	1	1.75325	3	3	3	3	3	3	3	3	3	9	18	27	2	2	4	3	4	4	3	3	3	9	19	28
706	2021-12-23	Second Year	male	14	8-10h/d	Undergraduate	Undergraduate	1.5	4	1	1	3	1	3	2	2.14286	2	1	1	2	1	3	2	1.71429	1.78571	3	3	3	3	3	3	3	3	3	9	18	27	3	3	3	3	3	3	4	4	4	12	18	30
707	2021-12-23	Second Year	male	13	8-10h/d	High school and blow	High school and blow	1.27273	1	5	4	1	1	1	2	2.14286	2	2	2	2	2	1	1	1.71429	1.70996	1	1	1	1	1	1	4	4	4	12	6	18	1	1	1	1	1	1	4	4	4	12	6	18
708	2021-12-23	Second Year	female	13	8-10h/d	High school and blow	High school and blow	2.04545	5	3	3	2	2	4	4	3.28571	1	3	3	3	2	5	5	3.14286	2.82468	2	3	3	2	3	3	3	3	3	9	16	25	3	3	3	3	3	2	3	3	3	9	17	26
709	2021-12-23	Second Year	female	15	6-8h/d	High school and blow	High school and blow	1.31818	3	2	1	3	2	3	3	2.42857	2	3	3	1	3	2	2	2.28571	2.01082	3	3	3	3	3	3	4	4	4	12	18	30	3	3	3	3	3	3	4	4	4	12	18	30
710	2021-12-23	Second Year	female	17	6-8h/d	High school and blow	High school and blow	1.5	5	2	5	1	1	1	2	2.42857	1	1	1	1	1	1	1	1	1.64286	2	2	2	2	2	2	3	3	2	8	12	20	2	2	2	2	2	3	2	2	2	6	13	19
711	2021-12-23	Second Year	male	13	8-10h/d	High school and blow	High school and blow	1.77273	3	2	2	1	1	2	2	1.85714	2	2	2	2	3	4	4	2.71429	2.11472	4	4	4	2	4	3	3	3	3	9	21	30	4	4	4	4	4	4	3	3	3	9	24	33
712	2021-12-23	Second Year	female	14	6-8h/d	High school and blow	High school and blow	1.54545	3	2	1	1	2	3	3	2.14286	2	1	3	1	2	2	3	2	1.8961	3	3	3	3	2	3	2	2	3	7	17	24	3	3	3	3	3	2	2	2	3	7	17	24
713	2021-12-23	Second Year	female	14	6-8h/d	High school and blow	High school and blow	1.77273	5	2	3	1	2	5	2	2.85714	2	2	2	2	2	2	2	2	2.20996	4	4	4	1	1	4	4	4	4	12	18	30	4	4	4	1	1	1	4	4	4	12	15	27
714	2021-12-23	Second Year	female	12	8-10h/d	High school and blow	High school and blow	1.59091	5	4	2	2	4	4	3	3.42857	3	3	3	3	3	3	3	3	2.67316	4	4	4	4	4	4	1	1	1	3	24	27	4	4	4	4	4	4	1	1	1	3	24	27
715	2021-12-23	Second Year	female	13	8-10h/d	High school and blow	High school and blow	1.09091	3	2	1	1	1	3	2	1.85714	4	4	4	1	4	1	1	2.71429	1.88745	3	3	3	3	2	3	3	3	3	9	17	26	3	3	3	2	2	3	3	3	3	9	16	25
716	2021-12-23	Second Year	male	13	8-10h/d	Undergraduate	Postgraduate and above	1.13636	4	1	2	1	1	2	1	1.71429	1	1	1	1	1	1	1	1	1.28355	2	2	2	2	2	2	3	3	3	9	12	21	3	3	3	3	3	3	2	2	2	6	18	24
717	2021-12-23	Second Year	female	16	6-8h/d	Specialties	Specialties	1.81818	3	3	3	3	1	3	3	2.71429	2	2	1	2	2	2	1	1.71429	2.08225	3	4	4	3	3	3	3	4	4	11	20	31	4	4	4	3	3	3	3	4	4	11	21	32
718	2021-12-23	Second Year	male	13	8-10h/d	High school and blow	High school and blow	2.36364	5	4	2	2	4	4	3	3.42857	3	3	3	3	3	3	3	3	2.93074	3	3	3	2	3	2	3	2	3	8	16	24	3	3	3	3	3	2	3	2	2	7	17	24
719	2021-12-23	Second Year	female	13	6-8h/d	Specialties	Specialties	1.09091	4	1	2	1	1	3	3	2.14286	2	2	2	2	2	2	1	1.85714	1.69697	3	2	2	2	1	2	4	4	4	12	12	24	1	1	1	1	1	1	4	4	4	12	6	18
720	2021-12-23	Second Year	female	14	8-10h/d	Specialties	Specialties	1.09091	4	5	2	2	1	1	1	2.28571	3	3	2	2	4	2	1	2.42857	1.93506	4	2	2	2	2	2	3	2	3	8	14	22	3	3	3	3	3	3	3	3	3	9	18	27
721	2021-12-23	Second Year	male	13	8-10h/d	High school and blow	High school and blow	1.31818	5	5	5	1	1	2	2	3	2	3	3	3	2	4	1	2.57143	2.29654	4	2	2	4	2	2	3	1	3	7	16	23	4	2	2	2	4	2	3	3	1	7	16	23
722	2021-12-23	Second Year	male	14	8-10h/d	High school and blow	High school and blow	1.18182	3	2	2	1	1	1	2	1.71429	3	1	1	1	1	1	1	1.28571	1.39394	3	3	3	3	3	3	3	3	3	9	18	27	3	3	3	3	3	3	3	3	3	9	18	27
723	2021-12-23	Second Year	female	14	6-8h/d	Specialties	High school and blow	1.09091	4	5	1	1	1	2	2	2.28571	1	1	1	1	1	3	2	1.42857	1.60173	1	2	3	1	1	1	1	1	1	3	9	12	4	1	1	1	1	1	4	3	4	11	9	20
724	2021-12-23	Second Year	male	14	6-8h/d	Specialties	Specialties	1.5	1	5	5	2	2	2	2	2.71429	1	1	1	1	1	1	1	1	1.7381	2	2	3	2	2	3	3	3	3	9	14	23	2	2	3	2	2	3	2	3	3	8	14	22
725	2021-12-23	Second Year	female	14	6-8h/d	Specialties	Specialties	1.13636	5	1	1	1	1	1	2	1.71429	5	5	5	5	5	1	1	3.85714	2.23593	1	1	1	1	1	1	2	2	2	6	6	12	3	3	1	1	1	1	4	4	4	12	10	22
726	2021-12-23	Second Year	male	13	6-8h/d	Specialties	Specialties	1.54545	4	4	2	3	3	3	3	3.14286	4	4	4	4	4	4	4	4	2.8961	4	4	4	4	4	4	1	1	1	3	24	27	4	4	4	4	4	4	1	1	1	3	24	27
727	2021-12-23	Second Year	male	13	8-10h/d	High school and blow	High school and blow	1.54545	5	1	1	5	5	5	2	3.42857	5	5	5	5	1	1	1	3.28571	2.75325	3	3	3	3	3	3	2	2	3	7	18	25	3	3	3	3	3	3	2	2	2	6	18	24
728	2021-12-23	Second Year	male	15	6-8h/d	High school and blow	High school and blow	1.09091	5	4	3	1	1	2	1	2.42857	2	2	2	2	2	2	2	2	1.83983	3	3	3	3	3	3	2	2	2	6	18	24	3	3	3	3	3	3	2	2	2	6	18	24
729	2021-12-23	Second Year	male	15	＜6h/d	Specialties	Specialties	1	3	2	2	1	1	1	2	1.71429	1	1	1	1	1	1	1	1	1.2381	3	3	3	3	3	3	3	3	3	9	18	27	3	3	3	3	3	3	3	3	3	9	18	27
730	2021-12-23	Second Year	female	13	6-8h/d	High school and blow	High school and blow	1.27273	5	1	1	1	1	4	2	2.14286	1	1	1	1	1	1	1	1	1.47186	3	3	3	3	3	3	2	3	2	7	18	25	3	3	2	3	3	2	3	3	3	9	16	25
731	2021-12-23	Second Year	male	14	6-8h/d	High school and blow	High school and blow	1.95455	3	2	1	3	3	5	4	3	2	2	2	2	2	4	3	2.42857	2.46104	3	3	4	4	3	2	4	3	3	10	19	29	3	3	2	2	3	2	3	4	4	11	15	26
732	2021-12-23	Second Year	male	13	6-8h/d	High school and blow	High school and blow	1.31818	1	2	1	1	1	3	2	1.57143	1	1	1	1	1	1	1	1	1.29654	2	2	2	2	2	2	1	2	1	4	12	16	2	2	2	2	2	2	2	2	2	6	12	18
733	2021-12-23	Second Year	female	13	6-8h/d	Undergraduate	Undergraduate	2.04545	1	3	2	3	3	2	2	2.28571	3	3	3	3	3	3	3	3	2.44372	2	4	3	3	1	3	2	3	3	8	16	24	2	4	3	3	3	3	2	3	3	8	18	26
734	2021-12-23	Second Year	female	14	6-8h/d	High school and blow	High school and blow	2.22727	5	1	2	1	1	2	3	2.14286	1	1	1	1	1	2	1	1.14286	1.83766	3	2	3	3	2	2	4	4	4	12	15	27	3	2	2	3	2	2	4	4	4	12	14	26
735	2021-12-23	Second Year	male	14	8-10h/d	High school and blow	High school and blow	1.09091	3	2	2	2	1	2	2	2	1	1	1	1	1	1	1	1	1.36364	1	1	1	1	1	1	4	4	4	12	6	18	3	1	3	3	1	3	2	4	2	8	14	22
736	2021-12-23	First Year	male	13	8-10h/d	High school and blow	High school and blow	1.68182	5	3	2	3	3	2	3	3	4	3	3	3	3	5	5	3.71429	2.7987	2	2	2	3	3	2	4	4	4	12	14	26	2	2	3	3	3	2	3	3	3	9	15	24
737	2021-12-23	First Year	female	12	8-10h/d	High school and blow	High school and blow	2.04545	5	1	4	2	1	5	5	3.28571	4	3	4	4	4	4	4	3.85714	3.06277	4	4	3	3	3	3	3	4	4	11	20	31	3	4	4	4	4	4	4	4	4	12	23	35
738	2021-12-23	First Year	male	12	6-8h/d	High school and blow	High school and blow	1.63636	5	1	1	1	4	4	2	2.57143	3	3	2	3	3	4	4	3.14286	2.45022	3	3	3	3	3	3	3	3	3	9	18	27	3	3	3	3	3	3	3	3	3	9	18	27
739	2021-12-23	First Year	female	12	8-10h/d	High school and blow	High school and blow	2.13636	4	1	1	1	1	4	2	2	2	2	2	2	2	3	3	2.28571	2.14069	3	2	3	3	3	2	4	4	3	11	16	27	2	2	3	3	3	2	4	4	4	12	15	27
740	2021-12-23	First Year	male	12	8-10h/d	Specialties	Specialties	1.59091	5	4	4	1	3	5	3	3.57143	5	5	5	5	2	1	4	3.85714	3.00649	4	4	4	4	4	4	4	4	4	12	24	36	4	4	4	4	4	4	4	4	4	12	24	36
741	2021-12-23	First Year	male	12	6-8h/d	Specialties	High school and blow	1.81818	5	1	1	2	1	5	3	2.57143	2	2	1	2	3	3	3	2.28571	2.22511	2	2	3	2	4	2	3	4	4	11	15	26	2	2	2	3	3	2	3	3	3	9	14	23
742	2021-12-23	First Year	female	14	6-8h/d	Specialties	Specialties	1.72727	5	1	1	1	2	3	2	2.14286	2	2	2	2	2	2	3	2.14286	2.00433	4	4	4	4	4	2	3	3	3	9	22	31	4	4	4	4	4	2	3	3	3	9	22	31
743	2021-12-23	First Year	female	12	6-8h/d	High school and blow	High school and blow	1.95455	5	1	3	1	3	4	3	2.85714	2	3	3	4	4	2	2	2.85714	2.55628	3	3	4	2	3	2	4	4	4	12	17	29	3	4	3	4	3	3	4	3	4	11	20	31
744	2021-12-23	First Year	male	13	6-8h/d	High school and blow	High school and blow	1.54545	5	4	3	1	2	3	2	2.85714	2	2	2	2	2	4	4	2.57143	2.32468	3	3	3	1	2	3	2	3	3	8	15	23	2	2	2	2	2	2	3	3	3	9	12	21
745	2021-12-23	First Year	female	12	6-8h/d	High school and blow	High school and blow	1.95455	5	4	2	3	4	5	4	3.85714	2	3	2	4	5	3	3	3.14286	2.98485	3	2	2	3	3	3	3	3	3	9	16	25	4	4	4	4	4	4	3	3	3	9	24	33
746	2021-12-23	First Year	female	12	8-10h/d	Specialties	Specialties	1.95455	5	1	1	1	5	5	4	3.14286	3	3	3	3	3	5	5	3.57143	2.88961	4	4	4	4	4	4	4	4	4	12	24	36	4	4	4	4	4	4	4	4	4	12	24	36
747	2021-12-23	First Year	female	13	8-10h/d	High school and blow	High school and blow	2.27273	5	2	1	5	5	5	5	4	5	5	5	5	5	5	5	5	3.75758	3	3	3	3	3	3	2	2	2	6	18	24	3	3	3	3	3	3	2	2	2	6	18	24
748	2021-12-23	First Year	male	12	6-8h/d	High school and blow	High school and blow	1.72727	5	1	1	1	1	3	1	1.85714	2	1	3	2	2	1	1	1.71429	1.76623	3	2	2	2	2	2	4	4	3	11	13	24	3	3	3	3	3	2	3	3	3	9	17	26
749	2021-12-23	First Year	male	12	6-8h/d	Specialties	Undergraduate	1.54545	5	1	1	1	3	4	2	2.42857	2	3	1	3	2	3	3	2.42857	2.1342	3	4	4	3	2	3	3	3	3	9	19	28	3	3	4	2	3	3	1	3	3	7	18	25
750	2021-12-23	First Year	female	12	8-10h/d	High school and blow	High school and blow	1.68182	3	1	3	1	3	5	4	2.85714	1	1	1	1	2	4	5	2.14286	2.22727	4	3	3	3	3	3	3	3	3	9	19	28	3	2	3	3	3	3	3	3	3	9	17	26
751	2021-12-23	First Year	female	13	6-8h/d	High school and blow	High school and blow	1.5	3	2	2	1	1	1	2	1.71429	5	5	5	5	5	5	5	5	2.7381	4	4	4	4	4	4	3	3	3	9	24	33	4	4	4	4	4	4	3	3	3	9	24	33
752	2021-12-23	First Year	male	12	6-8h/d	High school and blow	High school and blow	1.72727	5	1	2	3	1	3	3	2.57143	4	4	2	4	4	3	2	3.28571	2.52814	4	4	3	3	3	3	3	4	4	11	20	31	4	4	4	3	3	3	3	4	4	11	21	32
753	2021-12-23	First Year	female	13	8-10h/d	Undergraduate	High school and blow	1.36364	4	3	1	1	2	2	1	2	1	3	1	2	4	3	3	2.42857	1.93074	3	2	3	2	3	3	3	3	3	9	16	25	2	2	2	2	2	2	3	3	3	9	12	21
754	2021-12-23	First Year	female	13	6-8h/d	Specialties	Specialties	1.5	5	1	1	1	3	4	2	2.42857	5	5	3	5	5	1	1	3.57143	2.5	3	2	3	2	2	3	3	3	3	9	15	24	3	2	2	2	2	2	3	3	4	10	13	23
755	2021-12-23	First Year	female	12	8-10h/d	Undergraduate	Undergraduate	1.77273	5	1	2	3	1	3	2	2.42857	2	2	2	2	2	4	4	2.57143	2.25758	4	4	4	3	3	3	4	4	4	12	21	33	3	4	2	3	2	3	3	4	4	11	17	28
756	2021-12-23	First Year	male	12	8-10h/d	High school and blow	High school and blow	2.13636	5	1	1	1	1	5	4	2.57143	1	1	1	1	1	2	3	1.42857	2.04545	3	3	2	2	2	2	4	4	4	12	14	26	3	3	3	3	3	2	4	4	4	12	17	29
757	2021-12-23	First Year	female	13	8-10h/d	Undergraduate	Specialties	1.72727	1	2	1	1	1	2	1	1.28571	3	3	3	3	3	3	3	3	2.00433	3	2	2	3	2	3	3	3	3	9	15	24	2	3	3	3	2	3	3	3	3	9	16	25
758	2021-12-23	First Year	female	13	8-10h/d	Specialties	Specialties	1.54545	5	2	1	1	3	2	2	2.28571	4	4	3	4	4	5	5	4.14286	2.65801	3	3	3	2	2	2	4	4	4	12	15	27	3	3	3	2	2	2	4	4	4	12	15	27
759	2021-12-23	First Year	female	12	6-8h/d	High school and blow	High school and blow	2.27273	5	2	5	3	3	4	3	3.57143	1	2	2	3	3	5	5	3	2.94805	3	3	3	4	4	3	3	3	2	8	20	28	3	3	3	4	4	3	3	3	2	8	20	28
760	2021-12-23	First Year	female	13	8-10h/d	High school and blow	High school and blow	1.36364	5	5	5	2	3	5	3	4	2	1	2	1	2	4	5	2.42857	2.5974	4	4	4	4	4	4	3	2	3	8	24	32	4	4	4	4	4	4	3	2	3	8	24	32
761	2021-12-23	First Year	female	12	6-8h/d	High school and blow	High school and blow	1.5	3	2	2	1	1	1	3	1.85714	4	4	4	4	4	1	1	3.14286	2.16667	3	3	3	3	3	3	3	3	3	9	18	27	3	3	3	3	3	3	3	3	3	9	18	27
762	2021-12-23	First Year	male	12	8-10h/d	High school and blow	High school and blow	1.5	4	2	2	2	1	2	1	2	2	1	2	2	1	3	3	2	1.83333	2	2	3	3	2	1	4	4	4	12	13	25	2	4	4	4	4	3	4	4	3	11	21	32
763	2021-12-23	First Year	male	12	6-8h/d	High school and blow	High school and blow	1.40909	5	1	1	2	2	4	2	2.42857	2	2	2	2	2	3	3	2.28571	2.04113	3	3	3	2	2	2	4	4	4	12	15	27	3	3	3	2	2	2	4	4	4	12	15	27
764	2021-12-23	First Year	female	12	6-8h/d	High school and blow	High school and blow	1.27273	3	1	1	1	1	2	1	1.42857	1	1	1	1	1	1	1	1	1.23377	3	2	2	4	3	3	4	4	3	11	17	28	3	3	3	3	3	3	4	4	4	12	18	30
765	2021-12-23	First Year	male	13	6-8h/d	High school and blow	High school and blow	1.59091	5	1	1	1	1	1	2	1.71429	2	2	2	2	4	1	1	2	1.7684	2	2	2	4	2	2	4	4	4	12	14	26	2	2	2	4	2	2	4	4	4	12	14	26
766	2021-12-23	First Year	female	12	8-10h/d	High school and blow	High school and blow	1.5	4	2	3	2	2	4	2	2.71429	2	2	2	2	2	3	3	2.28571	2.16667	4	3	4	3	3	1	4	4	4	12	18	30	2	2	2	2	2	2	4	4	4	12	12	24
767	2021-12-23	First Year	female	13	8-10h/d	High school and blow	High school and blow	1.5	3	1	1	1	1	3	2	1.71429	2	2	2	2	2	2	2	2	1.7381	3	3	2	3	3	3	4	4	4	12	17	29	3	3	2	4	3	3	4	4	4	12	18	30
768	2021-12-23	First Year	female	12	8-10h/d	High school and blow	High school and blow	1.45455	5	3	3	1	1	5	4	3.14286	4	4	4	4	4	3	3	3.71429	2.77056	4	4	3	2	3	2	4	4	4	12	18	30	4	4	3	2	3	2	4	4	4	12	18	30
769	2021-12-23	First Year	female	13	＜6h/d	High school and blow	High school and blow	1.22727	4	1	1	1	1	4	1	1.85714	1	1	1	1	1	1	1	1	1.36147	4	2	2	2	2	2	4	4	4	12	14	26	4	2	2	2	3	2	4	4	4	12	15	27
770	2021-12-23	First Year	male	13	6-8h/d	High school and blow	High school and blow	1.27273	3	1	1	1	1	2	1	1.42857	1	1	1	1	1	2	2	1.28571	1.329	3	2	4	1	4	4	4	4	4	12	18	30	1	2	2	2	2	2	3	3	3	9	11	20
771	2021-12-23	First Year	male	12	6-8h/d	High school and blow	High school and blow	1.90909	5	4	1	3	3	5	5	3.71429	5	5	5	5	5	5	5	5	3.54113	2	2	2	2	4	4	3	3	3	9	16	25	3	3	3	3	2	3	3	3	3	9	17	26
772	2021-12-23	First Year	male	13	6-8h/d	Specialties	Specialties	2.40909	5	1	3	1	1	5	3	2.71429	3	3	3	3	3	3	3	3	2.70779	4	4	4	4	4	4	1	1	1	3	24	27	4	4	4	4	4	4	1	1	1	3	24	27
773	2021-12-23	First Year	female	12	6-8h/d	High school and blow	High school and blow	1.81818	5	4	1	2	2	5	5	3.42857	4	3	4	4	2	5	5	3.85714	3.03463	4	4	4	4	2	4	4	4	4	12	22	34	4	4	4	4	2	4	4	4	4	12	22	34
774	2021-12-23	First Year	female	12	6-8h/d	Undergraduate	Undergraduate	1.22727	3	1	1	1	1	2	1	1.42857	1	1	1	1	1	1	1	1	1.21861	3	3	3	3	3	3	4	4	4	12	18	30	3	3	3	3	3	3	4	4	4	12	18	30
775	2021-12-23	Senior Year	female	14	＜6h/d	High school and blow	High school and blow	1.72727	5	4	3	1	3	4	4	3.42857	3	3	3	3	3	3	1	2.71429	2.62338	4	4	4	4	4	4	3	3	3	9	24	33	4	4	4	4	4	4	3	3	3	9	24	33
776	2021-12-23	Third Year	female	14	6-8h/d	High school and blow	High school and blow	2.27273	5	4	3	4	4	5	4	4.14286	4	4	4	4	5	4	5	4.28571	3.5671	4	3	4	3	3	3	3	3	2	8	20	28	4	3	4	3	3	3	3	3	2	8	20	28
777	2021-12-23	Third Year	female	15	6-8h/d	High school and blow	High school and blow	1.72727	5	1	1	1	4	5	2	2.71429	2	3	5	2	5	4	3	3.42857	2.62338	3	2	3	2	2	3	3	3	4	10	15	25	3	2	3	2	2	3	2	3	3	8	15	23
778	2021-12-23	Third Year	female	15	6-8h/d	High school and blow	High school and blow	1.13636	2	1	1	1	1	1	2	1.28571	2	2	2	2	1	1	2	1.71429	1.37879	2	2	2	2	2	2	3	3	3	9	12	21	2	2	2	2	2	2	3	3	3	9	12	21
779	2021-12-23	Third Year	male	15	6-8h/d	High school and blow	High school and blow	1.86364	5	1	3	2	2	2	3	2.57143	2	3	2	4	3	4	5	3.28571	2.57359	2	1	2	1	2	1	3	4	3	10	9	19	2	1	2	1	2	1	3	4	3	10	9	19
780	2021-12-23	Third Year	female	15	6-8h/d	High school and blow	High school and blow	1.45455	5	1	1	1	1	4	3	2.28571	2	2	2	2	3	4	4	2.71429	2.15152	3	3	3	3	3	3	2	2	2	6	18	24	3	3	3	3	3	3	2	2	2	6	18	24
781	2021-12-23	Third Year	female	14	6-8h/d	Specialties	Specialties	1.68182	5	3	1	3	3	5	5	3.57143	4	4	4	4	4	4	4	4	3.08442	3	3	3	3	3	2	3	3	3	9	17	26	3	3	3	3	3	2	3	3	3	9	17	26
782	2021-12-23	Third Year	female	14	6-8h/d	Specialties	Specialties	1.68182	4	3	2	4	2	4	4	3.28571	4	4	4	4	4	4	4	4	2.98918	3	3	3	3	3	3	2	2	2	6	18	24	3	3	3	3	3	3	2	2	2	6	18	24
783	2021-12-23	Third Year	female	14	6-8h/d	Undergraduate	Undergraduate	1.77273	4	4	4	3	3	3	4	3.57143	1	1	2	3	4	5	5	3	2.78139	3	3	3	3	3	3	2	3	3	8	18	26	3	3	3	4	4	3	3	3	3	9	20	29
784	2021-12-23	Third Year	male	14	8-10h/d	High school and blow	High school and blow	2.04545	5	5	5	5	5	5	5	5	4	4	4	4	4	5	5	4.28571	3.77706	4	4	4	4	4	4	4	4	4	12	24	36	4	4	4	4	4	4	4	4	4	12	24	36
785	2021-12-23	Third Year	female	15	6-8h/d	Undergraduate	Undergraduate	1.59091	5	4	3	2	1	5	4	3.42857	4	4	4	3	3	2	2	3.14286	2.72078	3	3	3	3	3	2	4	3	3	10	17	27	3	3	3	3	3	3	3	3	3	9	18	27
786	2021-12-23	Third Year	female	14	6-8h/d	Undergraduate	Undergraduate	2.04545	5	2	3	3	2	5	4	3.42857	5	5	5	5	5	5	5	5	3.49134	4	3	3	3	3	3	3	3	3	9	19	28	4	3	3	3	3	3	2	2	2	6	19	25
787	2021-12-23	Third Year	male	15	6-8h/d	Undergraduate	Undergraduate	1.54545	5	1	1	4	1	4	4	2.85714	2	2	1	2	4	5	5	3	2.46753	3	3	3	3	3	3	4	4	4	12	18	30	3	3	3	3	3	3	4	4	4	12	18	30
788	2021-12-23	Third Year	male	15	6-8h/d	Undergraduate	Undergraduate	1.27273	5	1	4	2	1	3	3	2.71429	1	1	2	2	3	3	5	2.42857	2.13853	3	3	3	4	4	4	3	4	4	11	21	32	3	3	3	4	4	4	3	4	4	11	21	32
789	2021-12-23	Third Year	male	15	6-8h/d	Specialties	Specialties	3.13636	5	4	4	3	3	4	5	4	3	3	3	3	3	3	3	3	3.37879	3	3	3	3	3	3	2	2	2	6	18	24	3	3	3	3	3	3	2	2	2	6	18	24
790	2021-12-23	Third Year	male	14	6-8h/d	Specialties	Specialties	1.86364	5	4	4	5	5	5	3	4.42857	5	5	5	5	5	5	5	5	3.76407	3	3	3	2	2	3	3	3	3	9	16	25	3	3	3	3	3	3	3	3	3	9	18	27
791	2021-12-23	Third Year	male	14	6-8h/d	High school and blow	High school and blow	1.13636	4	1	2	1	3	2	2	2.14286	2	1	2	3	2	1	2	1.85714	1.71212	4	2	2	2	3	2	3	3	3	9	15	24	2	2	4	2	4	3	1	3	1	5	17	22
792	2021-12-23	Third Year	male	14	6-8h/d	High school and blow	High school and blow	1.18182	4	1	3	2	2	4	2	2.57143	2	1	2	2	1	2	4	2	1.91775	2	4	2	2	2	2	3	3	3	9	14	23	2	2	4	2	2	2	3	3	3	9	14	23
793	2021-12-23	Third Year	male	15	6-8h/d	Undergraduate	Undergraduate	1.40909	4	1	2	2	2	3	2	2.28571	2	2	2	2	2	2	2	2	1.89827	3	1	3	3	3	2	2	2	2	6	15	21	2	2	2	2	2	2	2	2	2	6	12	18
794	2021-12-23	Third Year	female	14	6-8h/d	High school and blow	High school and blow	1.68182	5	1	4	2	2	3	4	3	4	4	4	4	3	3	3	3.57143	2.75108	3	3	3	2	3	4	3	3	3	9	18	27	3	2	3	4	3	2	4	4	4	12	17	29
795	2021-12-23	Third Year	male	15	6-8h/d	High school and blow	High school and blow	1.90909	5	4	1	3	3	3	4	3.28571	5	5	5	3	5	4	4	4.42857	3.20779	3	3	3	2	1	2	4	4	4	12	14	26	3	3	3	2	1	2	4	4	4	12	14	26
796	2021-12-23	Third Year	female	15	6-8h/d	High school and blow	High school and blow	1.45455	4	1	1	1	1	1	1	1.42857	1	1	1	1	1	1	1	1	1.29437	3	1	3	1	1	1	4	4	4	12	10	22	4	4	4	4	1	1	4	4	4	12	18	30
797	2021-12-23	Third Year	female	14	6-8h/d	Undergraduate	Undergraduate	2.36364	5	3	2	5	5	5	4	4.14286	4	4	4	4	4	4	4	4	3.50216	3	3	3	3	3	3	4	1	4	9	18	27	3	3	3	3	3	3	4	1	4	9	18	27
798	2021-12-23	Third Year	female	15	6-8h/d	Undergraduate	Undergraduate	1.68182	3	3	3	1	1	1	3	2.14286	4	4	4	4	5	5	5	4.42857	2.75108	3	3	3	3	3	3	3	2	3	8	18	26	3	3	2	3	2	2	2	2	2	6	15	21
799	2021-12-23	Third Year	female	14	6-8h/d	High school and blow	High school and blow	1.72727	5	1	3	1	3	3	3	2.71429	2	1	3	1	2	4	4	2.42857	2.29004	3	3	3	3	3	3	3	3	3	9	18	27	3	3	3	3	3	3	3	3	3	9	18	27
800	2021-12-23	Third Year	female	14	6-8h/d	High school and blow	High school and blow	1.72727	5	1	1	3	3	4	3	2.85714	3	3	3	3	3	3	3	3	2.52814	3	3	3	3	2	3	4	4	4	12	17	29	3	3	3	3	2	3	4	4	4	12	17	29
801	2021-12-23	Third Year	female	14	6-8h/d	High school and blow	High school and blow	1.22727	5	2	1	1	3	2	2	2.28571	2	1	1	2	1	2	2	1.57143	1.69481	3	3	3	2	2	3	3	2	3	8	16	24	3	3	3	3	2	3	3	3	3	9	17	26
802	2021-12-23	Third Year	female	14	6-8h/d	High school and blow	High school and blow	1.77273	5	1	1	1	5	4	3	2.85714	1	2	4	3	2	3	1	2.28571	2.30519	3	3	3	3	3	3	3	3	3	9	18	27	3	3	3	3	3	3	3	3	3	9	18	27
803	2021-12-23	Third Year	male	14	6-8h/d	High school and blow	High school and blow	1.86364	5	1	1	3	4	5	5	3.42857	5	5	4	4	5	5	3	4.42857	3.24026	1	1	1	1	1	1	4	4	4	12	6	18	1	1	1	1	1	1	4	4	4	12	6	18
804	2021-12-23	Third Year	male	14	6-8h/d	High school and blow	High school and blow	1.45455	5	1	1	5	5	5	3	3.57143	1	1	1	1	3	5	5	2.42857	2.48485	3	3	3	3	3	2	4	4	4	12	17	29	3	3	3	3	3	3	4	4	4	12	18	30
805	2021-12-23	Third Year	male	15	6-8h/d	High school and blow	Specialties	1.81818	4	1	3	3	3	4	5	3.28571	4	4	4	4	4	2	2	3.42857	2.84416	4	4	4	4	4	3	2	2	2	6	23	29	4	4	4	4	3	3	2	2	2	6	22	28
806	2021-12-23	Third Year	female	14	6-8h/d	High school and blow	High school and blow	1.45455	5	1	1	2	1	3	2	2.14286	2	3	4	2	5	5	5	3.71429	2.43723	3	3	3	2	3	3	3	3	2	8	17	25	3	3	3	3	2	3	3	3	2	8	17	25
807	2021-12-23	Third Year	female	14	6-8h/d	High school and blow	High school and blow	1.68182	4	1	1	1	1	4	2	2	3	3	3	3	3	2	2	2.71429	2.13203	4	4	4	3	3	3	3	3	3	9	21	30	3	3	3	3	3	3	3	3	3	9	18	27
808	2021-12-23	Third Year	female	14	6-8h/d	High school and blow	High school and blow	1.59091	4	1	1	1	1	3	2	1.85714	3	3	3	3	3	2	2	2.71429	2.05411	3	2	3	2	3	2	3	3	3	9	15	24	3	2	3	2	3	2	3	3	3	9	15	24
809	2021-12-23	Third Year	female	14	6-8h/d	High school and blow	High school and blow	1.77273	5	4	4	2	4	4	4	3.85714	4	4	4	4	4	4	4	4	3.20996	3	3	3	3	3	3	3	3	3	9	18	27	3	3	3	3	3	3	3	3	3	9	18	27
810	2021-12-23	Third Year	male	15	6-8h/d	Undergraduate	High school and blow	1.77273	3	2	1	2	2	4	1	2.14286	2	2	3	2	4	3	3	2.71429	2.20996	3	3	4	2	2	3	3	2	3	8	17	25	3	3	3	3	2	3	2	3	3	8	17	25
811	2021-12-23	Third Year	male	14	6-8h/d	Undergraduate	Undergraduate	1.18182	4	1	1	4	3	3	3	2.71429	3	3	3	3	3	3	3	3	2.2987	3	2	3	4	3	2	3	3	3	9	17	26	2	2	3	3	2	3	3	3	3	9	15	24
812	2021-12-23	First Year	male	12	8-10h/d	High school and blow	High school and blow	1.63636	3	2	2	2	1	1	2	1.85714	4	4	3	3	4	4	2	3.42857	2.30736	3	3	2	3	3	3	3	3	3	9	17	26	3	3	3	3	3	3	1	4	3	8	18	26
813	2021-12-23	First Year	female	12	6-8h/d	High school and blow	High school and blow	1.09091	5	2	1	1	1	2	1	1.85714	3	3	2	3	3	1	1	2.28571	1.74459	4	4	4	2	4	4	3	3	3	9	22	31	4	3	3	4	3	4	3	3	3	9	21	30
814	2021-12-23	First Year	male	13	6-8h/d	High school and blow	High school and blow	1.72727	3	1	5	2	4	4	2	3	2	2	2	2	1	1	1	1.57143	2.09957	2	1	1	2	3	3	2	2	2	6	12	18	3	3	1	3	1	3	2	3	2	7	14	21
815	2021-12-23	First Year	female	13	6-8h/d	High school and blow	High school and blow	1.59091	4	2	1	2	2	3	3	2.42857	2	2	2	2	2	2	2	2	2.00649	3	3	3	3	3	3	3	3	3	9	18	27	3	3	3	3	3	3	3	3	3	9	18	27
816	2021-12-23	First Year	female	12	6-8h/d	High school and blow	High school and blow	1.68182	1	1	1	3	2	4	2	2	2	1	1	1	1	3	3	1.71429	1.7987	2	2	3	1	4	1	4	4	4	12	13	25	1	1	1	1	1	1	4	4	4	12	6	18
817	2021-12-23	First Year	female	12	8-10h/d	Specialties	Specialties	3.18182	5	2	2	5	4	2	1	3	4	4	4	4	4	4	2	3.71429	3.2987	3	3	3	3	3	3	2	3	3	8	18	26	3	3	3	3	3	3	4	4	4	12	18	30
818	2021-12-23	First Year	female	12	8-10h/d	High school and blow	High school and blow	1.54545	4	1	1	1	4	4	1	2.28571	2	2	2	2	2	1	1	1.71429	1.84848	3	3	3	3	4	3	2	2	2	6	19	25	3	3	3	3	3	3	2	2	3	7	18	25
819	2021-12-23	First Year	female	13	6-8h/d	Undergraduate	Undergraduate	1.59091	4	4	4	5	4	3	3	3.85714	4	4	4	4	4	4	4	4	3.14935	3	3	3	4	4	3	2	2	3	7	20	27	3	3	3	4	4	3	2	3	3	8	20	28
820	2021-12-23	First Year	female	12	8-10h/d	High school and blow	Specialties	1.63636	5	1	1	1	3	2	2	2.14286	2	2	2	2	2	3	4	2.42857	2.06926	3	3	3	3	3	3	4	4	3	11	18	29	3	3	3	3	3	1	4	4	4	12	16	28
821	2021-12-23	First Year	male	12	6-8h/d	High school and blow	High school and blow	2.04545	3	1	2	3	2	1	3	2.14286	1	1	1	4	4	4	4	2.71429	2.30087	3	3	3	3	2	1	4	4	4	12	15	27	3	2	2	3	3	1	4	4	4	12	14	26
822	2021-12-23	First Year	female	12	6-8h/d	Undergraduate	Undergraduate	1.68182	5	1	1	3	2	4	3	2.71429	4	4	2	4	4	1	1	2.85714	2.41775	3	3	3	3	3	3	2	2	2	6	18	24	3	2	2	3	3	3	2	2	2	6	16	22
823	2021-12-23	First Year	female	13	8-10h/d	Specialties	Specialties	1.31818	4	5	1	1	3	4	2	2.85714	2	2	1	2	2	1	4	2	2.05844	4	3	3	3	3	3	2	4	1	7	19	26	4	3	4	3	3	2	4	4	4	12	19	31
824	2021-12-23	First Year	female	13	6-8h/d	Undergraduate	High school and blow	1.45455	4	1	1	1	1	2	1	1.57143	4	4	1	4	4	2	2	3	2.00866	4	3	2	2	2	2	1	1	1	3	15	18	4	2	2	2	2	2	2	3	3	8	14	22
825	2021-12-23	First Year	female	12	8-10h/d	High school and blow	High school and blow	2.18182	4	1	4	2	5	5	5	3.71429	5	5	5	5	5	5	5	5	3.63203	3	3	3	4	4	4	4	4	4	12	21	33	3	3	3	4	4	4	4	4	4	12	21	33
826	2021-12-23	First Year	female	12	6-8h/d	High school and blow	High school and blow	1.27273	5	2	2	2	1	2	2	2.28571	3	3	3	3	2	2	2	2.57143	2.04329	3	3	3	2	2	3	4	4	4	12	16	28	2	2	2	3	2	1	4	4	4	12	12	24
827	2021-12-23	First Year	female	13	6-8h/d	High school and blow	High school and blow	1.95455	5	2	2	2	1	2	2	2.28571	3	3	3	3	2	2	2	2.57143	2.27056	3	3	3	3	2	2	4	4	4	12	16	28	2	2	2	3	2	1	4	4	4	12	12	24
828	2021-12-23	First Year	female	13	6-8h/d	Undergraduate	Undergraduate	1.36364	3	1	2	1	1	3	1	1.71429	3	3	1	3	3	4	1	2.57143	1.88312	3	2	3	2	3	2	3	3	3	9	15	24	4	4	4	2	2	3	3	3	3	9	19	28
829	2021-12-23	First Year	female	12	6-8h/d	Undergraduate	Undergraduate	1.27273	3	1	3	1	1	5	1	2.14286	2	2	1	2	2	1	1	1.57143	1.66234	2	2	2	2	2	2	3	3	3	9	12	21	2	2	2	2	2	2	3	3	3	9	12	21
830	2021-12-23	First Year	female	12	6-8h/d	Specialties	Specialties	1.5	3	2	1	1	2	2	3	2	1	3	3	4	1	1	1	2	1.83333	2	1	1	3	4	1	2	4	4	10	12	22	3	3	1	4	4	1	2	4	4	10	16	26
831	2021-12-23	First Year	female	12	8-10h/d	Specialties	Specialties	1.72727	5	3	4	1	3	3	2	3	2	2	1	2	2	1	1	1.57143	2.09957	3	3	3	3	3	3	3	3	3	9	18	27	3	3	3	3	3	3	3	3	3	9	18	27
832	2021-12-23	First Year	female	12	6-8h/d	High school and blow	High school and blow	1.27273	3	1	2	1	1	4	2	2	3	2	3	1	1	2	2	2	1.75758	3	3	3	3	3	3	3	4	4	11	18	29	3	3	3	3	2	2	4	4	4	12	16	28
833	2021-12-23	First Year	female	12	6-8h/d	High school and blow	High school and blow	1.31818	5	1	1	1	3	4	3	2.57143	1	2	2	2	4	4	4	2.71429	2.2013	3	3	3	3	3	3	2	2	2	6	18	24	3	3	3	3	3	3	2	2	2	6	18	24
834	2021-12-23	First Year	female	13	8-10h/d	High school and blow	High school and blow	1.81818	5	1	1	3	2	4	3	2.71429	4	4	2	4	4	1	2	3	2.51082	3	4	4	3	3	4	3	3	3	9	21	30	3	4	4	3	3	4	3	3	3	9	21	30
835	2021-12-23	First Year	male	12	6-8h/d	Undergraduate	Undergraduate	1.72727	5	4	1	1	4	5	2	3.14286	4	4	4	4	4	4	4	4	2.95671	3	3	3	3	2	3	2	2	2	6	17	23	3	3	3	3	2	3	2	2	2	6	17	23
836	2021-12-23	First Year	male	13	6-8h/d	High school and blow	High school and blow	1.09091	3	1	1	1	1	1	1	1.28571	1	1	1	1	1	2	2	1.28571	1.22078	1	1	1	3	3	3	2	2	4	8	12	20	1	1	1	3	3	3	2	2	4	8	12	20
837	2021-12-23	First Year	male	15	8-10h/d	High school and blow	High school and blow	3.5	4	4	1	4	2	2	3	2.85714	4	4	4	4	4	4	4	4	3.45238	3	3	3	3	2	3	3	2	3	8	17	25	3	3	3	3	2	3	3	2	3	8	17	25
838	2021-12-23	First Year	male	12	8-10h/d	Specialties	Specialties	1.5	3	1	1	1	2	2	2	1.71429	2	2	2	2	1	3	3	2.14286	1.78571	2	2	2	4	3	3	3	3	3	9	16	25	3	3	3	3	3	3	3	3	3	9	18	27
839	2021-12-23	First Year	female	13	6-8h/d	High school and blow	High school and blow	1.81818	4	1	1	2	4	3	3	2.57143	3	2	4	2	2	1	1	2.14286	2.17749	3	3	4	3	4	3	4	3	3	10	20	30	4	3	3	3	3	3	2	2	2	6	19	25
840	2021-12-23	First Year	male	12	8-10h/d	High school and blow	High school and blow	1.86364	5	5	1	4	3	5	5	4	2	2	2	2	2	5	5	2.85714	2.90693	3	3	3	2	2	3	2	2	2	6	16	22	3	4	4	2	2	3	2	2	2	6	18	24
841	2021-12-23	First Year	male	12	6-8h/d	High school and blow	High school and blow	2.81818	5	5	5	2	2	2	2	3.28571	5	5	5	5	5	4	4	4.71429	3.60606	3	3	3	3	3	3	2	2	4	8	18	26	3	3	3	3	3	3	2	2	4	8	18	26
842	2021-12-23	First Year	male	12	6-8h/d	High school and blow	High school and blow	1.77273	4	2	1	1	1	1	2	1.71429	4	3	3	3	2	1	1	2.42857	1.97186	3	2	2	3	4	2	4	2	4	10	16	26	2	2	3	4	4	2	1	1	1	3	17	20
843	2021-12-23	First Year	female	13	8-10h/d	High school and blow	High school and blow	1.5	3	2	2	2	1	1	2	1.85714	2	2	2	2	2	2	2	2	1.78571	4	4	4	4	4	4	1	1	1	3	24	27	4	4	4	4	4	4	1	1	1	3	24	27
844	2021-12-23	First Year	male	12	8-10h/d	High school and blow	High school and blow	1.36364	5	1	4	3	5	5	5	4	4	4	4	4	4	4	4	4	3.12121	2	2	2	2	2	2	2	3	3	8	12	20	2	2	2	3	3	3	3	3	3	9	15	24
845	2021-12-23	First Year	male	12	8-10h/d	Undergraduate	Undergraduate	3.04545	5	2	5	5	4	5	5	4.42857	3	3	3	3	3	5	5	3.57143	3.68182	3	2	3	4	2	4	4	4	4	12	18	30	2	4	3	4	4	4	4	4	4	12	21	33
846	2021-12-23	First Year	female	12	6-8h/d	High school and blow	High school and blow	2.18182	1	1	5	1	1	2	1	1.71429	2	1	1	1	2	2	2	1.57143	1.82251	3	3	3	3	2	3	3	2	2	7	17	24	3	3	3	3	3	3	3	3	3	9	18	27
847	2021-12-23	First Year	female	12	8-10h/d	High school and blow	High school and blow	1.95455	4	4	4	4	5	4	3	4	4	4	4	4	4	2	2	3.42857	3.12771	3	4	3	3	4	3	3	3	4	10	20	30	3	3	4	3	3	4	2	3	4	9	20	29
848	2021-12-23	First Year	male	13	6-8h/d	High school and blow	High school and blow	1.09091	3	1	1	1	1	1	2	1.42857	3	3	3	3	3	3	3	3	1.83983	4	4	4	4	4	4	1	1	1	3	24	27	4	4	4	4	4	4	1	1	1	3	24	27
849	2021-12-23	First Year	male	12	6-8h/d	Undergraduate	Undergraduate	1.5	5	5	1	4	3	4	3	3.57143	3	2	1	3	2	1	2	2	2.35714	4	4	3	4	4	3	3	3	3	9	22	31	4	4	3	4	4	3	3	3	3	9	22	31
850	2021-12-23	First Year	male	12	6-8h/d	Postgraduate and above	Postgraduate and above	2.36364	5	4	3	5	5	5	5	4.57143	4	4	4	4	4	5	5	4.28571	3.74026	4	4	4	4	4	4	1	1	1	3	24	27	4	4	4	4	4	4	3	3	3	9	24	33
851	2021-12-23	First Year	female	14	6-8h/d	Undergraduate	Undergraduate	1.72727	5	1	4	5	5	5	5	4.28571	5	5	5	5	5	5	4	4.85714	3.62338	3	3	3	2	2	3	3	3	3	9	16	25	3	3	3	3	2	2	3	3	3	9	16	25
852	2021-12-23	First Year	male	12	6-8h/d	High school and blow	High school and blow	1.45455	5	4	3	3	3	3	4	3.57143	3	4	3	1	3	5	5	3.42857	2.81818	3	2	2	2	4	2	3	2	3	8	15	23	2	2	2	3	2	2	3	3	3	9	13	22
853	2021-12-23	First Year	female	12	6-8h/d	High school and blow	High school and blow	1.5	4	1	5	1	3	2	3	2.71429	1	1	1	1	1	1	1	1	1.7381	3	3	3	3	3	2	2	3	3	8	17	25	3	2	2	3	3	2	2	3	3	8	15	23
854	2021-12-23	First Year	male	12	8-10h/d	Specialties	High school and blow	2.09091	5	5	5	2	4	5	3	4.14286	5	5	5	5	5	5	5	5	3.74459	3	3	3	3	3	3	3	4	4	11	18	29	4	4	4	4	4	3	3	4	4	11	23	34
855	2021-12-23	First Year	female	13	8-10h/d	Undergraduate	Undergraduate	1.45455	4	2	2	2	2	3	4	2.71429	4	3	3	4	2	3	1	2.85714	2.34199	3	3	2	3	3	2	2	3	3	8	16	24	3	3	2	3	3	2	3	3	3	9	16	25
856	2021-12-23	First Year	female	12	8-10h/d	High school and blow	High school and blow	2.04545	4	1	5	1	1	4	1	2.42857	1	1	1	1	1	2	2	1.28571	1.91991	3	3	3	3	3	3	2	2	2	6	18	24	3	3	3	3	3	3	2	2	2	6	18	24
857	2021-12-23	First Year	female	11	＞10h/d	Undergraduate	Undergraduate	2.77273	5	1	1	2	5	5	5	3.42857	5	5	5	5	5	5	5	5	3.73377	4	4	4	4	4	4	4	4	1	9	24	33	4	4	4	4	4	4	4	4	1	9	24	33
858	2021-12-23	First Year	female	13	8-10h/d	Undergraduate	Specialties	1.36364	4	1	2	1	1	4	2	2.14286	3	3	3	2	3	2	2	2.57143	2.02597	3	3	3	2	3	3	2	3	3	8	17	25	4	4	3	3	3	4	2	3	3	8	21	29
859	2021-12-23	First Year	male	12	8-10h/d	High school and blow	High school and blow	1.81818	5	2	4	4	1	5	4	3.57143	2	3	2	4	3	5	5	3.42857	2.93939	3	2	2	2	3	4	3	2	2	7	16	23	3	3	3	3	2	4	2	3	2	7	18	25
860	2021-12-23	First Year	male	12	8-10h/d	Undergraduate	High school and blow	1.90909	5	5	2	3	1	5	4	3.57143	4	4	4	4	4	4	4	4	3.16017	3	4	4	4	4	4	3	3	3	9	23	32	3	3	3	4	4	4	3	3	3	9	21	30
861	2021-12-23	First Year	female	12	＜6h/d	Specialties	Specialties	1.54545	5	1	1	3	2	3	1	2.28571	1	1	1	1	1	4	4	1.85714	1.8961	3	2	3	1	1	1	4	4	4	12	11	23	3	2	2	1	1	1	4	4	4	12	10	22
862	2021-12-23	First Year	male	13	6-8h/d	High school and blow	High school and blow	1.54545	5	5	5	1	4	4	2	3.71429	5	5	5	5	5	4	4	4.71429	3.32468	3	1	3	1	1	2	3	3	3	9	11	20	4	1	1	1	1	4	3	3	3	9	12	21
863	2021-12-23	First Year	female	12	8-10h/d	Undergraduate	Undergraduate	1.27273	5	3	1	1	1	5	1	2.42857	4	4	4	4	4	4	4	4	2.5671	4	4	4	3	3	1	3	2	3	8	19	27	4	4	4	2	3	3	3	3	2	8	20	28
864	2021-12-23	First Year	male	15	8-10h/d	High school and blow	High school and blow	1.45455	4	5	3	3	2	3	2	3.14286	4	4	4	4	4	3	3	3.71429	2.77056	3	3	3	3	2	3	3	3	3	9	17	26	3	3	3	3	2	3	3	3	3	9	17	26
865	2021-12-23	First Year	female	13	6-8h/d	Specialties	Specialties	1.36364	4	3	2	1	1	1	2	2	3	3	3	1	3	2	2	2.42857	1.93074	3	3	3	3	3	3	2	2	2	6	18	24	3	3	3	3	3	3	2	2	2	6	18	24
866	2021-12-23	First Year	male	13	6-8h/d	Specialties	Undergraduate	1.22727	3	1	1	1	5	5	2	2.57143	1	2	2	2	5	5	4	3	2.26623	4	4	3	4	4	1	2	2	3	7	20	27	1	1	1	1	4	1	1	1	3	5	9	14
867	2021-12-23	First Year	male	12	8-10h/d	Specialties	High school and blow	1.36364	5	1	1	2	1	5	5	2.85714	4	4	4	4	4	4	4	4	2.74026	4	3	3	4	3	3	4	4	4	12	20	32	4	4	4	4	4	4	4	4	4	12	24	36
868	2021-12-23	First Year	male	13	6-8h/d	High school and blow	High school and blow	1.36364	4	4	4	2	2	2	5	3.28571	5	5	5	5	5	5	5	5	3.21645	1	1	1	1	1	1	4	4	2	10	6	16	2	2	2	3	3	3	3	3	3	9	15	24
869	2021-12-23	First Year	female	13	8-10h/d	High school and blow	High school and blow	2.09091	3	1	3	2	3	1	2	2.14286	2	2	2	2	2	4	3	2.42857	2.22078	3	4	4	4	4	2	3	3	4	10	21	31	4	4	4	3	3	4	4	3	3	10	22	32
870	2021-12-23	First Year	female	12	8-10h/d	High school and blow	High school and blow	4	5	5	5	5	5	5	3	4.71429	4	4	4	4	4	4	4	4	4.2381	4	4	4	4	4	4	1	1	1	3	24	27	4	4	4	4	4	4	1	1	1	3	24	27
871	2021-12-23	First Year	female	12	6-8h/d	Specialties	Specialties	1.22727	4	4	1	1	1	1	3	2.14286	2	2	2	2	2	1	1	1.71429	1.69481	3	1	1	1	1	2	4	4	4	12	9	21	3	1	2	1	1	1	4	4	4	12	9	21
872	2021-12-23	First Year	female	12	6-8h/d	High school and blow	High school and blow	1.77273	5	4	5	5	2	5	5	4.42857	5	5	5	5	5	5	5	5	3.73377	4	4	4	3	4	3	2	1	1	4	22	26	4	4	4	3	4	3	2	1	1	4	22	26
873	2021-12-23	First Year	male	13	6-8h/d	Undergraduate	Undergraduate	1.45455	5	4	3	2	5	5	5	4.14286	5	4	4	4	5	5	5	4.57143	3.38961	4	4	3	3	4	4	4	4	4	12	22	34	4	4	4	3	4	4	4	4	4	12	23	35
874	2021-12-23	First Year	female	13	8-10h/d	High school and blow	High school and blow	1.5	5	2	2	2	1	3	2	2.42857	3	3	3	2	3	2	2	2.57143	2.16667	2	2	2	2	2	2	3	2	2	7	12	19	3	3	3	2	2	3	2	2	2	6	16	22
875	2021-12-23	First Year	female	12	＞10h/d	Specialties	Specialties	2.27273	5	2	5	4	2	4	5	3.85714	5	5	5	5	5	5	5	5	3.70996	4	4	4	3	4	3	3	3	2	8	22	30	4	4	4	3	4	3	3	3	2	8	22	30
876	2021-12-23	First Year	female	13	6-8h/d	High school and blow	Undergraduate	1.54545	4	2	3	1	5	4	2	3	3	3	3	3	3	1	1	2.42857	2.32468	3	2	2	4	4	3	4	3	2	9	18	27	4	2	3	4	4	3	1	2	3	6	20	26
877	2021-12-23	First Year	female	13	6-8h/d	High school and blow	High school and blow	1.5	3	2	1	1	1	2	2	1.71429	1	1	2	3	2	3	3	2.14286	1.78571	3	3	3	3	3	3	3	3	3	9	18	27	3	3	3	3	3	3	3	3	3	9	18	27
878	2021-12-23	First Year	female	12	8-10h/d	High school and blow	High school and blow	1.77273	5	5	5	5	5	5	4	4.85714	5	5	5	5	5	5	5	5	3.87662	1	1	1	1	4	1	4	4	1	9	9	18	1	1	1	1	4	1	4	4	1	9	9	18
879	2021-12-23	First Year	male	13	8-10h/d	High school and blow	High school and blow	2	5	5	5	3	3	2	2	3.57143	4	4	4	4	4	4	4	4	3.19048	3	3	3	2	3	2	2	2	2	6	16	22	4	4	3	4	3	4	2	1	2	5	22	27
880	2021-12-23	First Year	male	12	8-10h/d	High school and blow	High school and blow	1.68182	5	4	4	2	3	4	4	3.71429	4	4	4	4	4	4	4	4	3.13203	2	2	2	2	3	4	3	3	3	9	15	24	2	2	2	2	3	4	3	3	3	9	15	24
881	2021-12-23	First Year	female	12	8-10h/d	Undergraduate	Undergraduate	2.22727	5	1	1	1	2	3	1	2	1	1	2	1	5	5	1	2.28571	2.171	3	1	3	3	2	3	4	4	3	11	15	26	4	4	4	3	1	3	4	4	4	12	19	31
882	2021-12-23	First Year	female	12	6-8h/d	High school and blow	High school and blow	1.72727	4	1	1	1	2	3	5	2.42857	4	4	4	4	4	3	3	3.71429	2.62338	3	3	3	3	3	3	3	3	3	9	18	27	3	3	3	3	3	3	3	3	3	9	18	27
883	2021-12-23	First Year	male	13	8-10h/d	High school and blow	High school and blow	1.81818	5	1	3	2	5	5	5	3.71429	5	5	5	5	5	5	5	5	3.51082	3	3	3	3	3	3	3	4	4	11	18	29	3	3	4	3	3	3	3	3	4	10	19	29
884	2021-12-23	First Year	female	13	8-10h/d	High school and blow	High school and blow	2.04545	4	1	1	2	1	4	3	2.28571	5	5	5	1	5	1	2	3.42857	2.58658	4	4	4	4	3	2	2	2	4	8	21	29	4	4	4	4	3	2	3	3	4	10	21	31
885	2021-12-23	First Year	male	12	8-10h/d	High school and blow	High school and blow	1.40909	5	3	3	1	1	4	3	2.85714	4	4	4	4	4	1	1	3.14286	2.4697	3	2	2	1	1	2	4	4	4	12	11	23	1	1	1	1	1	1	4	4	4	12	6	18
886	2021-12-23	First Year	female	12	8-10h/d	High school and blow	High school and blow	1.27273	1	1	1	1	1	4	1	1.42857	4	4	4	4	4	1	1	3.14286	1.94805	1	1	1	1	1	1	4	4	4	12	6	18	2	2	3	4	2	3	4	4	4	12	16	28
887	2021-12-23	First Year	female	12	6-8h/d	Undergraduate	Undergraduate	1.13636	3	1	1	1	1	4	1	1.71429	2	2	2	1	2	1	1	1.57143	1.47403	3	2	3	3	2	2	4	4	4	12	15	27	2	2	2	3	2	2	4	4	4	12	13	25
888	2021-12-23	First Year	male	13	8-10h/d	High school and blow	High school and blow	1.27273	5	5	4	1	3	4	5	3.85714	4	4	4	3	4	3	3	3.57143	2.90043	3	3	4	3	3	3	3	3	3	9	19	28	3	3	3	3	3	3	3	3	3	9	18	27
889	2021-12-23	First Year	female	12	8-10h/d	High school and blow	High school and blow	1.77273	4	2	1	2	5	3	4	3	2	2	4	4	2	4	4	3.14286	2.63853	2	2	2	2	2	2	3	3	3	9	12	21	3	4	3	2	2	4	1	2	2	5	18	23
890	2021-12-23	Third Year	male	14	6-8h/d	High school and blow	High school and blow	1.77273	4	2	3	2	1	4	3	2.71429	1	2	3	2	4	2	2	2.28571	2.25758	2	3	3	2	2	3	2	3	3	8	15	23	2	3	3	3	2	3	2	3	3	8	16	24
891	2021-12-23	Third Year	female	14	8-10h/d	Specialties	Specialties	1.72727	3	2	2	2	1	1	2	1.85714	4	4	4	4	1	3	2	3.14286	2.24242	3	3	3	3	3	3	3	3	3	9	18	27	3	3	3	3	3	3	3	3	3	9	18	27
892	2021-12-23	Third Year	female	16	6-8h/d	High school and blow	High school and blow	1.45455	5	2	1	1	3	2	2	2.28571	2	1	1	1	2	2	2	1.57143	1.77056	3	3	3	3	3	2	3	3	2	8	17	25	3	3	3	3	3	3	2	2	2	6	18	24
893	2021-12-23	Third Year	male	15	8-10h/d	High school and blow	High school and blow	2.5	4	2	2	2	4	5	3	3.14286	4	4	4	4	4	4	4	4	3.21429	3	3	3	3	3	2	3	3	3	9	17	26	3	3	3	3	3	4	3	3	3	9	19	28
894	2021-12-23	Third Year	male	14	6-8h/d	Undergraduate	Undergraduate	1.59091	4	4	3	1	3	5	3	3.28571	1	1	1	1	3	3	3	1.85714	2.24459	3	3	3	3	2	2	3	3	3	9	16	25	3	3	3	3	2	3	3	3	3	9	17	26
895	2021-12-23	Third Year	female	15	6-8h/d	High school and blow	High school and blow	1.95455	4	1	1	3	2	5	4	2.85714	3	4	5	2	3	1	3	3	2.6039	4	4	3	3	2	4	2	3	2	7	20	27	4	4	4	2	4	4	3	3	3	9	22	31
896	2021-12-23	Third Year	male	14	6-8h/d	High school and blow	High school and blow	2.13636	5	1	2	3	2	4	5	3.14286	5	5	5	5	5	2	2	4.14286	3.14069	3	4	4	3	4	4	3	4	4	11	22	33	4	4	3	4	4	2	4	4	4	12	21	33
897	2021-12-23	Third Year	male	14	6-8h/d	Undergraduate	Specialties	1.40909	3	2	4	1	4	4	2	2.85714	3	2	3	3	2	2	2	2.42857	2.2316	3	3	2	1	3	3	2	2	2	6	15	21	3	3	3	3	3	3	2	2	2	6	18	24
898	2021-12-23	Third Year	male	15	6-8h/d	High school and blow	High school and blow	1.5	4	1	2	1	1	2	1	1.71429	2	2	2	2	2	2	2	2	1.7381	3	2	3	2	2	2	2	4	4	10	14	24	1	1	1	3	2	1	4	4	4	12	9	21
899	2021-12-23	Third Year	male	14	8-10h/d	High school and blow	High school and blow	1.31818	5	1	1	1	1	1	3	1.85714	2	2	2	2	2	1	1	1.71429	1.62987	3	3	3	3	3	3	2	2	2	6	18	24	2	3	3	3	3	3	2	2	4	8	17	25
900	2021-12-23	Third Year	male	16	6-8h/d	Undergraduate	Undergraduate	1.27273	5	4	1	1	1	4	3	2.71429	2	3	4	4	4	1	1	2.71429	2.23377	2	2	3	2	3	3	3	4	3	10	15	25	3	1	1	1	1	1	3	3	2	8	8	16
901	2021-12-23	Third Year	female	15	6-8h/d	High school and blow	High school and blow	1.5	3	2	1	2	1	2	1	1.71429	2	1	1	1	1	3	3	1.71429	1.64286	3	3	3	3	3	3	3	3	3	9	18	27	2	2	2	2	2	2	3	3	3	9	12	21
902	2021-12-23	Third Year	male	15	＜6h/d	High school and blow	High school and blow	1.68182	2	2	2	2	2	2	2	2	2	2	2	2	2	2	2	2	1.89394	3	3	3	3	3	3	1	2	2	5	18	23	3	3	3	3	3	3	2	2	2	6	18	24
903	2021-12-23	Third Year	male	14	6-8h/d	High school and blow	High school and blow	1.27273	3	2	2	1	1	1	2	1.71429	1	2	3	2	4	2	2	2.28571	1.75758	3	3	3	3	3	3	2	2	2	6	18	24	3	3	3	3	3	3	2	2	2	6	18	24
904	2021-12-23	Third Year	male	14	6-8h/d	High school and blow	High school and blow	1.77273	4	1	2	1	3	3	2	2.28571	1	2	2	2	3	4	4	2.57143	2.20996	3	3	3	2	4	2	4	4	4	12	17	29	3	3	3	3	2	2	4	4	4	12	16	28
905	2021-12-23	Third Year	male	14	6-8h/d	High school and blow	High school and blow	1.5	4	1	4	3	2	2	3	2.71429	5	5	5	5	5	4	4	4.71429	2.97619	3	3	3	3	3	3	3	3	3	9	18	27	3	3	3	3	3	3	3	3	3	9	18	27
906	2021-12-23	Third Year	male	15	6-8h/d	Specialties	Specialties	1.72727	3	3	3	3	4	5	3	3.42857	4	4	4	4	4	4	4	4	3.05195	3	2	1	2	1	2	4	3	2	9	11	20	2	3	2	3	3	3	3	2	3	8	16	24
907	2021-12-23	Third Year	male	16	8-10h/d	High school and blow	High school and blow	1.45455	3	2	3	1	1	4	3	2.42857	2	2	2	2	2	4	4	2.57143	2.15152	3	3	3	2	2	3	3	4	3	10	16	26	2	3	3	2	2	3	3	4	4	11	15	26
908	2021-12-23	Third Year	male	14	8-10h/d	High school and blow	High school and blow	1.77273	5	2	3	3	2	2	3	2.85714	4	4	4	4	4	4	4	4	2.87662	3	3	3	3	3	3	2	2	2	6	18	24	3	3	3	3	3	3	3	3	3	9	18	27
909	2021-12-23	Third Year	male	15	8-10h/d	Undergraduate	High school and blow	1.22727	4	4	3	3	4	2	3	3.28571	2	3	3	2	2	2	2	2.28571	2.26623	3	2	3	2	3	2	2	3	2	7	15	22	2	3	2	3	2	3	3	2	3	8	15	23
910	2021-12-23	Third Year	female	15	6-8h/d	Undergraduate	Undergraduate	1.90909	4	1	3	3	3	4	3	3	2	2	3	3	4	5	5	3.42857	2.77922	3	3	3	2	3	2	3	3	3	9	16	25	2	2	3	2	3	3	2	2	2	6	15	21
911	2021-12-23	Third Year	female	15	6-8h/d	Undergraduate	Undergraduate	1.63636	4	3	2	2	3	3	2	2.71429	3	3	3	3	3	2	2	2.71429	2.35498	3	3	3	3	2	3	3	3	3	9	17	26	3	3	3	3	3	2	3	3	3	9	17	26
912	2021-12-23	Third Year	female	15	6-8h/d	High school and blow	Undergraduate	1.31818	4	1	1	1	2	3	5	2.42857	3	3	3	3	2	2	2	2.57143	2.10606	4	4	4	4	4	4	2	2	2	6	24	30	4	4	4	4	4	4	2	2	2	6	24	30
913	2021-12-23	Third Year	female	14	8-10h/d	Undergraduate	Specialties	1.81818	3	1	2	3	3	4	5	3	3	2	4	4	5	2	5	3.57143	2.79654	3	4	3	4	3	3	2	3	2	7	20	27	3	3	3	3	3	3	2	2	3	7	18	25
914	2021-12-23	Third Year	female	14	6-8h/d	High school and blow	High school and blow	2.09091	4	1	2	1	3	3	5	2.71429	3	3	3	3	3	3	3	3	2.60173	3	3	3	2	2	3	4	4	4	12	16	28	3	3	3	2	2	3	4	4	4	12	16	28
915	2021-12-23	Third Year	female	17	＜6h/d	High school and blow	High school and blow	1.27273	3	1	1	2	1	2	1	1.57143	3	4	4	4	4	2	2	3.28571	2.04329	3	2	3	3	3	2	2	2	3	7	16	23	3	3	3	3	2	3	2	2	2	6	17	23
916	2021-12-23	Third Year	female	15	8-10h/d	High school and blow	High school and blow	1.72727	5	2	2	1	1	1	1	1.85714	1	1	1	1	1	1	1	1	1.52814	3	3	3	4	4	4	4	4	4	12	21	33	3	3	3	4	4	4	4	4	4	12	21	33
917	2021-12-23	Third Year	male	15	6-8h/d	High school and blow	High school and blow	1.59091	5	2	3	1	1	1	2	2.14286	5	5	5	5	5	1	1	3.85714	2.5303	4	2	1	2	1	1	3	3	3	9	11	20	4	2	2	2	1	1	3	3	3	9	12	21
918	2021-12-23	Third Year	male	14	6-8h/d	High school and blow	High school and blow	1.68182	4	2	2	4	5	4	4	3.57143	2	2	3	4	4	4	4	3.28571	2.84632	3	3	3	2	2	2	4	4	4	12	15	27	2	2	2	2	2	2	3	3	3	9	12	21
919	2021-12-23	Third Year	female	14	6-8h/d	High school and blow	High school and blow	1.36364	4	2	2	1	1	2	2	2	1	1	1	1	2	1	1	1.14286	1.50216	3	3	3	3	2	2	1	1	3	5	16	21	3	3	3	3	3	3	2	2	2	6	18	24
920	2021-12-23	Third Year	male	14	6-8h/d	High school and blow	High school and blow	1.45455	5	1	1	3	5	5	3	3.28571	4	1	4	4	1	3	3	2.85714	2.53247	2	4	4	3	1	3	3	3	3	9	17	26	3	4	4	3	1	3	4	4	4	12	18	30
921	2021-12-23	Third Year	female	15	6-8h/d	Postgraduate and above	Postgraduate and above	1.22727	5	1	2	1	1	2	1	1.85714	2	2	1	2	2	1	2	1.71429	1.59957	3	3	4	3	4	2	3	3	3	9	19	28	3	3	4	3	4	2	3	3	3	9	19	28
922	2021-12-23	Third Year	male	15	6-8h/d	Undergraduate	Undergraduate	2.18182	5	4	3	5	4	5	3	4.14286	4	4	4	4	4	4	4	4	3.44156	3	3	3	3	3	3	2	2	2	6	18	24	3	3	3	3	3	3	2	2	2	6	18	24
923	2021-12-23	Third Year	female	14	6-8h/d	Undergraduate	Undergraduate	1.5	5	1	1	1	3	3	3	2.42857	1	1	1	1	1	1	1	1	1.64286	3	3	3	4	3	3	3	2	3	8	19	27	3	3	3	3	3	2	3	3	3	9	17	26
924	2021-12-23	Second Year	female	13	8-10h/d	High school and blow	High school and blow	1.09091	4	2	3	2	3	3	2	2.71429	1	2	1	1	2	2	2	1.57143	1.79221	2	2	2	2	3	2	3	3	3	9	13	22	2	2	2	2	3	2	3	3	3	9	13	22
925	2021-12-23	Second Year	female	13	8-10h/d	High school and blow	High school and blow	1.59091	3	3	3	1	1	1	3	2.14286	4	4	4	4	4	4	4	4	2.57792	2	2	1	1	1	2	4	4	4	12	9	21	2	2	1	1	1	2	4	4	4	12	9	21
926	2021-12-23	Second Year	female	14	8-10h/d	High school and blow	High school and blow	1.27273	4	3	3	3	3	3	3	3.14286	3	3	3	3	4	3	3	3.14286	2.51948	3	3	3	3	3	3	2	2	2	6	18	24	3	3	3	2	3	3	2	3	2	7	17	24
927	2021-12-23	Second Year	male	14	6-8h/d	Specialties	Specialties	1.13636	4	1	1	2	1	3	3	2.14286	2	2	2	2	2	3	3	2.28571	1.85498	3	3	3	2	2	2	2	2	2	6	15	21	3	3	2	2	2	2	2	2	2	6	14	20
928	2021-12-23	Second Year	male	14	8-10h/d	High school and blow	High school and blow	1.27273	3	3	3	2	1	2	2	2.28571	3	3	3	3	2	3	1	2.57143	2.04329	4	4	4	4	4	4	1	1	1	3	24	27	4	4	4	4	4	4	1	1	1	3	24	27
929	2021-12-23	Second Year	male	14	＜6h/d	Undergraduate	High school and blow	2.13636	5	1	5	4	4	4	5	4	5	5	5	5	5	5	5	5	3.71212	4	4	4	4	4	4	2	2	2	6	24	30	4	4	4	4	4	4	1	1	1	3	24	27
930	2021-12-23	Second Year	male	14	8-10h/d	High school and blow	High school and blow	1.5	5	4	4	3	3	3	4	3.71429	3	3	3	4	3	4	4	3.42857	2.88095	4	4	4	4	4	4	2	2	2	6	24	30	4	4	4	4	4	4	1	1	1	3	24	27
931	2021-12-23	Second Year	male	14	8-10h/d	High school and blow	High school and blow	1.63636	4	2	1	1	1	3	3	2.14286	2	2	2	2	2	3	2	2.14286	1.97403	3	3	3	1	1	1	4	3	4	11	12	23	4	4	3	2	2	2	4	4	4	12	17	29
932	2021-12-23	Second Year	male	13	8-10h/d	Specialties	Specialties	1.5	3	3	3	2	1	1	2	2.14286	4	4	4	4	4	2	1	3.28571	2.30952	4	4	3	2	1	2	4	3	3	10	16	26	2	3	4	2	2	3	2	3	4	9	16	25
933	2021-12-23	Second Year	female	13	6-8h/d	Undergraduate	Specialties	1.59091	3	2	2	1	1	1	4	2	3	4	5	5	5	5	5	4.57143	2.72078	2	2	2	4	4	3	2	1	2	5	17	22	3	2	2	3	2	2	1	1	3	5	14	19
934	2021-12-23	Second Year	male	13	8-10h/d	Specialties	Specialties	1.59091	3	3	3	2	1	1	3	2.28571	5	5	5	5	5	4	4	4.71429	2.86364	4	4	4	4	4	4	2	2	2	6	24	30	4	4	4	4	4	3	2	2	1	5	23	28
935	2021-12-23	Second Year	male	14	8-10h/d	High school and blow	High school and blow	1.04545	2	2	2	1	1	1	2	1.57143	1	1	1	1	1	1	2	1.14286	1.25325	2	2	2	2	2	3	3	3	3	9	13	22	2	2	2	2	2	2	3	3	3	9	12	21
936	2021-12-23	Second Year	female	13	6-8h/d	Undergraduate	High school and blow	1.95455	4	1	1	3	3	3	3	2.57143	2	2	2	3	3	3	2	2.42857	2.31818	3	3	3	3	3	3	4	4	4	12	18	30	3	3	2	2	2	3	4	4	4	12	15	27
937	2021-12-23	Second Year	female	14	8-10h/d	High school and blow	High school and blow	1.90909	5	1	4	1	4	4	3	3.14286	4	4	2	4	4	2	2	3.14286	2.7316	4	4	4	3	3	1	4	4	3	11	19	30	4	4	3	2	3	4	4	4	4	12	20	32
938	2021-12-23	Second Year	female	14	6-8h/d	High school and blow	High school and blow	1.18182	5	1	2	1	1	3	2	2.14286	1	1	1	1	1	1	2	1.14286	1.48918	2	2	2	2	2	2	3	3	3	9	12	21	3	3	3	3	3	3	2	2	2	6	18	24
939	2021-12-23	Second Year	female	13	6-8h/d	High school and blow	High school and blow	2.27273	5	5	5	3	3	1	3	3.57143	5	5	2	5	4	1	1	3.28571	3.04329	3	3	3	3	3	3	3	4	4	11	18	29	3	3	3	3	3	3	3	4	4	11	18	29
940	2021-12-23	Second Year	female	14	8-10h/d	High school and blow	Specialties	1.81818	5	2	2	2	3	4	2	2.85714	4	2	2	4	5	1	1	2.71429	2.4632	3	2	3	3	2	3	2	3	3	8	16	24	3	3	3	3	2	2	2	2	3	7	16	23
941	2021-12-23	Second Year	female	16	6-8h/d	High school and blow	High school and blow	1.81818	4	1	1	1	1	1	2	1.57143	2	2	1	2	2	1	1	1.57143	1.65368	3	3	4	3	2	2	2	2	1	5	17	22	3	3	3	2	4	3	2	2	1	5	18	23
942	2021-12-23	Second Year	male	13	6-8h/d	Specialties	Undergraduate	1.54545	5	5	5	3	3	4	3	4	3	3	3	3	5	5	5	3.85714	3.1342	2	3	2	3	3	4	1	1	3	5	17	22	3	2	3	3	3	4	2	2	2	6	18	24
943	2021-12-23	Second Year	male	14	6-8h/d	Specialties	Specialties	1.54545	4	5	1	3	3	3	2	3	3	3	3	3	3	2	2	2.71429	2.41991	3	2	2	2	2	2	3	3	3	9	13	22	3	3	3	3	3	3	2	2	2	6	18	24
944	2021-12-23	Second Year	female	13	6-8h/d	Undergraduate	Specialties	1.04545	5	1	1	1	1	2	1	1.71429	1	1	1	1	1	2	1	1.14286	1.30087	1	1	1	1	1	1	4	4	4	12	6	18	4	1	1	1	1	1	4	4	4	12	9	21
945	2021-12-23	Second Year	female	14	8-10h/d	High school and blow	High school and blow	2.63636	5	5	5	1	5	4	4	4.14286	4	3	2	3	3	5	5	3.57143	3.45022	3	4	4	4	3	4	3	4	4	11	22	33	3	2	4	4	2	2	4	3	4	11	17	28
946	2021-12-23	Second Year	male	14	6-8h/d	High school and blow	High school and blow	1.54545	4	2	2	1	1	4	2	2.28571	2	2	2	2	2	1	1	1.71429	1.84848	3	3	3	3	3	3	3	3	3	9	18	27	4	3	3	2	2	3	3	3	3	9	17	26
947	2021-12-23	Second Year	female	14	8-10h/d	High school and blow	High school and blow	2.04545	5	1	3	3	2	4	3	3	3	3	4	2	4	3	2	3	2.68182	3	3	2	2	2	3	4	4	4	12	15	27	3	3	2	2	2	3	4	4	4	12	15	27
948	2021-12-23	Second Year	female	13	6-8h/d	Specialties	Specialties	1.27273	3	1	1	3	1	1	2	1.71429	4	4	4	4	4	4	3	3.85714	2.28139	3	3	3	2	3	2	2	2	2	6	16	22	3	3	2	2	2	2	4	3	3	10	14	24
949	2021-12-23	Second Year	female	15	6-8h/d	Undergraduate	High school and blow	2.13636	4	4	3	3	3	4	4	3.57143	4	4	3	2	4	1	1	2.71429	2.80736	4	3	3	1	1	3	4	4	4	12	15	27	4	3	3	2	2	3	4	4	4	12	17	29
950	2021-12-23	Second Year	male	14	8-10h/d	High school and blow	High school and blow	1.95455	5	2	3	1	1	1	2	2.14286	2	2	2	2	2	2	2	2	2.03247	2	3	2	3	2	2	2	3	2	7	14	21	2	2	3	2	3	2	3	3	3	9	14	23
951	2021-12-23	Second Year	male	14	6-8h/d	Undergraduate	Undergraduate	1.31818	3	1	1	1	1	1	2	1.42857	1	1	1	1	1	1	1	1	1.24892	3	2	2	2	2	3	3	3	3	9	14	23	3	3	2	3	2	3	2	3	3	8	16	24
952	2021-12-23	Second Year	male	13	8-10h/d	Undergraduate	Undergraduate	1.68182	2	2	2	1	1	1	2	1.57143	2	2	2	2	2	2	2	2	1.75108	4	4	4	4	4	4	1	1	1	3	24	27	4	4	4	4	4	4	2	2	2	6	24	30
953	2021-12-23	Second Year	female	15	＜6h/d	High school and blow	High school and blow	1.68182	4	1	1	1	1	2	2	1.71429	2	2	2	2	2	2	2	2	1.7987	3	3	3	3	3	3	2	2	2	6	18	24	3	3	3	3	3	3	2	2	2	6	18	24
954	2021-12-23	Second Year	male	14	6-8h/d	Specialties	High school and blow	2.27273	3	3	3	3	1	2	3	2.57143	5	5	5	5	4	4	4	4.57143	3.13853	4	4	4	4	4	3	2	1	2	5	23	28	4	4	4	4	4	4	1	1	1	3	24	27
955	2021-12-23	Second Year	female	14	6-8h/d	Specialties	High school and blow	1.54545	4	4	2	2	1	1	2	2.28571	2	2	3	3	2	1	1	2	1.94372	3	2	3	1	1	1	4	4	4	12	11	23	1	1	1	1	1	1	4	4	4	12	6	18
956	2021-12-23	Second Year	female	15	8-10h/d	High school and blow	High school and blow	1.59091	5	2	3	1	2	4	1	2.57143	1	2	2	1	1	1	1	1.28571	1.81602	3	3	4	3	1	4	4	3	2	9	18	27	1	1	1	1	4	1	3	2	2	7	9	16
957	2021-12-23	First Year	female	13	6-8h/d	Specialties	Specialties	1.77273	3	2	2	4	1	4	2	2.57143	4	4	4	4	4	5	5	4.28571	2.87662	3	3	3	2	3	3	3	4	4	11	17	28	1	1	1	1	1	1	4	4	4	12	6	18
958	2021-12-23	Second Year	female	13	＞10h/d	Undergraduate	Undergraduate	1.63636	5	3	2	4	3	5	4	3.71429	3	1	2	3	4	5	1	2.71429	2.68831	3	3	3	3	3	3	2	2	2	6	18	24	3	1	1	3	3	3	2	2	3	7	14	21
959	2021-12-23	Second Year	female	15	＜6h/d	High school and blow	High school and blow	1.27273	4	2	5	1	2	2	1	2.42857	1	1	3	4	1	2	1	1.85714	1.85281	3	3	3	1	1	1	1	1	1	3	12	15	3	3	3	1	1	1	1	1	1	3	12	15
960	2021-12-23	Second Year	male	14	6-8h/d	Specialties	High school and blow	1.81818	4	1	3	3	2	4	4	3	4	4	1	4	4	1	3	3	2.60606	3	3	2	3	2	2	2	2	2	6	15	21	3	3	3	3	3	3	2	2	2	6	18	24
961	2021-12-23	First Year	female	17	6-8h/d	High school and blow	High school and blow	1.40909	5	1	1	1	4	2	3	2.42857	2	2	2	2	2	3	3	2.28571	2.04113	3	3	3	2	3	3	3	3	2	8	17	25	3	3	3	2	3	2	3	2	3	8	16	24
962	2021-12-23	First Year	male	13	6-8h/d	High school and blow	High school and blow	1.59091	5	1	1	1	1	1	1	1.57143	2	2	2	2	2	2	2	2	1.72078	3	3	1	1	1	1	4	4	4	12	10	22	3	3	3	3	1	3	2	3	2	7	16	23
963	2021-12-23	First Year	male	12	6-8h/d	High school and blow	High school and blow	1.36364	5	1	1	1	4	4	4	2.85714	4	4	4	4	4	4	4	4	2.74026	3	2	2	3	2	2	2	3	2	7	14	21	2	2	2	2	2	2	2	3	2	7	12	19
964	2021-12-23	First Year	female	13	8-10h/d	Specialties	Specialties	1.18182	3	1	1	1	1	2	1	1.42857	2	2	2	2	2	2	2	2	1.5368	1	1	1	1	1	1	4	4	4	12	6	18	1	1	1	1	1	1	4	4	4	12	6	18
965	2021-12-23	First Year	male	12	6-8h/d	High school and blow	High school and blow	1.86364	4	4	1	1	3	4	3	2.85714	3	4	2	4	4	2	1	2.85714	2.52597	3	3	3	3	3	3	1	2	1	4	18	22	3	3	3	3	3	3	1	2	1	4	18	22
966	2021-12-23	First Year	female	12	6-8h/d	High school and blow	Specialties	1.86364	5	2	2	5	3	5	3	3.57143	4	4	1	4	3	2	1	2.71429	2.71645	3	1	3	2	2	4	3	3	2	8	15	23	4	4	4	1	2	2	4	2	3	9	17	26
967	2021-12-23	First Year	female	12	＞10h/d	Postgraduate and above	Postgraduate and above	2.36364	5	1	2	2	4	5	4	3.28571	4	4	3	5	4	4	5	4.14286	3.26407	4	2	4	2	2	4	1	1	3	5	18	23	4	2	3	2	2	4	1	2	1	4	17	21
968	2021-12-23	First Year	female	12	6-8h/d	High school and blow	High school and blow	2.09091	4	1	1	1	1	4	2	2	1	1	1	1	5	5	5	2.71429	2.2684	3	3	3	3	3	3	3	3	3	9	18	27	3	3	3	3	3	3	3	3	3	9	18	27
969	2021-12-23	First Year	male	12	8-10h/d	Specialties	Specialties	2.95455	5	5	5	5	5	5	5	5	5	5	5	5	5	5	5	5	4.31818	3	3	3	3	4	3	3	2	3	8	19	27	3	3	3	3	4	3	3	2	3	8	19	27
970	2021-12-23	First Year	male	12	6-8h/d	High school and blow	High school and blow	1.90909	4	5	3	3	5	4	4	4	4	4	4	4	4	4	4	4	3.30303	3	2	3	2	2	2	3	3	4	10	14	24	3	2	2	2	2	2	3	3	4	10	13	23
971	2021-12-23	First Year	female	13	8-10h/d	High school and blow	High school and blow	1.36364	4	3	3	1	2	3	2	2.57143	4	4	4	4	4	3	2	3.57143	2.50216	4	4	4	4	4	4	1	1	3	5	24	29	4	4	4	4	4	4	1	1	3	5	24	29
972	2021-12-23	First Year	female	12	6-8h/d	High school and blow	High school and blow	1.31818	4	1	2	1	1	2	2	1.85714	1	1	1	1	2	1	1	1.14286	1.43939	3	3	3	3	3	3	3	3	3	9	18	27	3	3	3	3	3	2	3	3	3	9	17	26
973	2021-12-23	First Year	female	12	6-8h/d	High school and blow	High school and blow	1.27273	5	1	1	1	1	5	2	2.28571	1	1	1	1	1	1	3	1.28571	1.61472	3	2	2	3	2	3	4	2	3	9	15	24	3	2	2	2	2	2	4	2	3	9	13	22
974	2021-12-23	First Year	male	12	8-10h/d	High school and blow	High school and blow	1.36364	4	1	5	1	2	2	3	2.57143	2	2	1	2	2	3	2	2	1.97835	4	4	3	2	3	2	2	2	3	7	18	25	4	4	4	3	3	2	3	2	3	8	20	28
975	2021-12-23	First Year	female	12	6-8h/d	High school and blow	High school and blow	1.54545	4	2	2	1	2	5	4	2.85714	3	4	3	4	4	2	1	3	2.46753	3	3	3	2	3	2	2	3	3	8	16	24	3	3	3	3	3	3	2	2	2	6	18	24
976	2021-12-23	First Year	female	13	6-8h/d	High school and blow	High school and blow	1.77273	5	2	2	2	2	5	5	3.28571	2	2	2	2	3	1	1	1.85714	2.30519	3	2	3	2	2	3	4	4	4	12	15	27	3	3	3	2	2	3	4	4	4	12	16	28
977	2021-12-23	First Year	female	13	8-10h/d	High school and blow	High school and blow	1.54545	4	2	1	1	1	4	2	2.14286	2	2	2	2	2	2	2	2	1.8961	3	2	2	2	2	4	4	4	4	12	15	27	4	3	2	2	2	2	4	4	4	12	15	27
978	2021-12-23	First Year	female	12	6-8h/d	High school and blow	High school and blow	1.27273	3	1	1	1	1	2	1	1.42857	2	2	2	2	2	2	2	2	1.5671	3	3	3	3	3	3	2	2	2	6	18	24	3	3	3	3	3	3	2	2	2	6	18	24
979	2021-12-23	First Year	male	13	6-8h/d	High school and blow	High school and blow	2	5	3	3	3	1	3	3	3	3	3	1	3	3	4	3	2.85714	2.61905	4	2	3	3	2	3	1	1	1	3	17	20	3	3	3	3	1	2	1	1	1	3	15	18
980	2021-12-23	First Year	female	12	＜6h/d	Postgraduate and above	Undergraduate	1.27273	4	1	1	1	1	2	2	1.71429	2	2	1	2	2	1	1	1.57143	1.51948	3	3	3	2	3	2	4	4	2	10	16	26	2	3	3	2	3	2	3	2	2	7	15	22
981	2021-12-23	First Year	female	12	6-8h/d	High school and blow	High school and blow	1.27273	4	3	2	2	1	3	2	2.42857	3	3	3	3	3	3	3	3	2.23377	4	4	4	3	3	2	3	2	3	8	20	28	3	3	3	3	2	2	3	2	3	8	16	24
982	2021-12-23	First Year	female	12	6-8h/d	High school and blow	High school and blow	1.5	4	4	3	1	2	2	2	2.57143	2	1	1	4	4	1	1	2	2.02381	3	2	3	3	3	3	2	2	2	6	17	23	3	3	3	3	3	3	2	2	2	6	18	24
983	2021-12-23	First Year	female	13	6-8h/d	High school and blow	High school and blow	1.63636	4	1	1	1	2	5	2	2.28571	2	1	1	3	3	2	2	2	1.97403	4	4	4	4	4	4	3	3	3	9	24	33	4	4	4	4	4	4	3	3	3	9	24	33
984	2021-12-23	First Year	female	12	6-8h/d	High school and blow	High school and blow	1.31818	5	2	3	1	3	3	2	2.71429	1	1	1	1	1	4	4	1.85714	1.9632	4	4	4	4	4	4	3	4	3	10	24	34	4	4	4	4	4	4	3	3	3	9	24	33
985	2021-12-23	First Year	female	13	6-8h/d	High school and blow	High school and blow	1.95455	5	2	2	1	1	5	3	2.71429	4	4	4	4	4	4	3	3.85714	2.84199	4	4	3	1	1	1	4	4	4	12	14	26	4	4	3	2	3	2	4	4	4	12	18	30
986	2021-12-23	First Year	male	13	8-10h/d	High school and blow	High school and blow	1.68182	4	2	2	2	1	4	2	2.42857	2	2	2	2	2	4	3	2.42857	2.17965	1	1	1	1	1	1	2	2	2	6	6	12	3	1	1	1	1	1	3	3	3	9	8	17
987	2021-12-23	First Year	female	13	8-10h/d	High school and blow	High school and blow	2.27273	4	3	3	2	1	1	3	2.42857	2	3	1	2	2	2	2	2	2.23377	1	1	1	1	3	1	4	3	3	10	8	18	1	1	1	1	1	1	4	4	4	12	6	18
988	2021-12-23	First Year	female	13	6-8h/d	High school and blow	High school and blow	1.54545	3	1	2	1	3	3	2	2.14286	2	3	1	2	3	2	2	2.14286	1.94372	1	1	1	1	3	1	4	3	3	10	8	18	1	1	1	1	1	1	4	4	4	12	6	18
989	2021-12-23	First Year	male	12	8-10h/d	Specialties	Specialties	2.22727	4	1	1	5	5	5	5	3.71429	5	5	5	5	5	5	5	5	3.64719	1	1	1	1	4	1	4	4	4	12	9	21	1	1	1	1	4	1	4	4	4	12	9	21
990	2021-12-23	First Year	female	13	8-10h/d	High school and blow	High school and blow	2.72727	5	5	2	1	1	4	2	2.85714	4	4	4	4	4	4	4	4	3.19481	4	4	4	4	4	3	3	2	2	7	23	30	4	4	4	4	4	4	1	1	1	3	24	27
991	2021-12-23	First Year	female	13	8-10h/d	High school and blow	High school and blow	1.27273	1	1	2	1	1	1	3	1.42857	2	2	2	2	2	2	2	2	1.5671	3	3	3	3	3	3	3	3	3	9	18	27	3	4	4	4	3	4	3	3	3	9	22	31
992	2021-12-23	First Year	male	14	8-10h/d	High school and blow	High school and blow	1.40909	3	3	3	1	1	1	3	2.14286	1	1	1	1	1	1	2	1.14286	1.56494	1	1	1	1	1	1	4	4	4	12	6	18	2	2	2	2	2	2	2	2	2	6	12	18
993	2021-12-23	First Year	male	12	6-8h/d	Specialties	Specialties	1.40909	3	3	3	1	1	1	3	2.14286	4	4	4	4	4	4	4	4	2.51732	3	3	3	3	3	3	2	2	2	6	18	24	3	3	3	3	3	3	2	2	2	6	18	24
994	2021-12-23	First Year	female	13	8-10h/d	High school and blow	High school and blow	1.54545	5	1	2	1	2	3	3	2.42857	1	2	3	1	2	3	1	1.85714	1.94372	3	4	4	3	3	3	3	4	4	11	20	31	3	4	4	3	3	3	4	4	4	12	20	32
995	2021-12-23	First Year	male	13	8-10h/d	High school and blow	High school and blow	1.72727	5	4	4	1	2	3	2	3	2	2	2	2	3	4	4	2.71429	2.48052	2	3	3	2	3	1	3	3	3	9	14	23	3	3	3	2	2	2	2	3	3	8	15	23
996	2021-12-23	First Year	female	13	6-8h/d	Specialties	Specialties	2.27273	1	1	1	1	1	1	3	1.28571	4	4	4	4	4	3	3	3.71429	2.42424	4	4	4	4	4	4	2	2	2	6	24	30	4	4	4	4	4	4	2	2	2	6	24	30
997	2021-12-23	First Year	male	13	6-8h/d	High school and blow	Undergraduate	2.59091	5	5	5	3	5	3	3	4.14286	2	2	2	3	5	5	5	3.42857	3.38745	3	3	4	4	3	2	2	3	2	7	19	26	3	3	3	3	2	3	2	2	2	6	17	23
998	2021-12-23	First Year	female	12	＜6h/d	High school and blow	High school and blow	1.77273	5	1	1	2	3	3	3	2.57143	1	2	3	3	3	5	4	3	2.44805	4	4	4	3	3	3	3	3	3	9	21	30	3	3	3	3	3	3	3	3	3	9	18	27
999	2021-12-23	First Year	female	12	8-10h/d	Specialties	Specialties	2.81818	3	3	1	2	2	1	2	2	3	2	3	2	4	4	4	3.14286	2.65368	3	3	3	3	3	3	2	2	2	6	18	24	3	3	3	3	3	3	2	2	2	6	18	24
1000	2021-12-23	First Year	female	13	6-8h/d	Undergraduate	Undergraduate	2.09091	4	1	3	1	2	4	1	2.28571	1	2	3	4	4	4	1	2.71429	2.36364	3	3	4	3	3	3	2	3	2	7	19	26	3	3	2	3	3	3	2	3	2	7	17	24
1001	2021-12-23	First Year	male	13	8-10h/d	High school and blow	High school and blow	1.27273	4	1	1	1	1	3	3	2	2	2	3	4	2	2	1	2.28571	1.85281	2	2	2	2	2	2	3	3	3	9	12	21	3	2	3	2	2	2	3	3	3	9	14	23
1002	2021-12-23	First Year	male	13	6-8h/d	Specialties	Specialties	1.68182	4	1	1	3	1	3	4	2.42857	2	2	2	2	2	4	4	2.57143	2.22727	4	3	3	3	3	3	4	4	4	12	19	31	3	3	3	3	3	3	4	4	4	12	18	30
1003	2021-12-23	First Year	male	12	8-10h/d	High school and blow	High school and blow	1.63636	5	1	1	3	1	5	5	3	4	4	1	4	4	2	2	3	2.54545	3	1	1	3	1	3	4	4	4	12	12	24	3	3	3	3	1	1	4	4	2	10	14	24
1004	2021-12-23	First Year	female	13	6-8h/d	High school and blow	High school and blow	3.27273	5	2	3	5	5	4	3	3.85714	5	5	5	5	5	5	5	5	4.04329	4	4	4	4	4	4	1	1	1	3	24	27	4	4	4	4	4	4	1	1	1	3	24	27
1005	2021-12-23	First Year	female	12	6-8h/d	High school and blow	High school and blow	1.90909	5	1	1	2	1	3	3	2.28571	2	3	1	3	2	4	3	2.57143	2.25541	3	4	3	2	2	3	4	4	3	11	17	28	3	4	3	3	2	3	4	3	4	11	18	29
1006	2021-12-23	First Year	female	12	6-8h/d	Undergraduate	Postgraduate and above	1.72727	5	1	1	3	1	4	1	2.28571	4	4	1	2	1	5	3	2.85714	2.29004	3	2	2	1	1	1	4	4	4	12	10	22	4	4	4	4	4	4	1	1	1	3	24	27
1007	2021-12-23	First Year	female	12	6-8h/d	Undergraduate	Undergraduate	1.45455	5	1	1	3	1	5	2	2.57143	3	4	3	3	4	4	3	3.42857	2.48485	2	4	4	4	4	3	3	3	3	9	21	30	2	4	4	4	4	3	4	4	4	12	21	33
1008	2021-12-23	First Year	female	13	6-8h/d	High school and blow	High school and blow	1.45455	4	2	2	4	3	3	2	2.85714	2	2	2	2	2	2	2	2	2.1039	3	3	3	3	3	4	4	4	4	12	19	31	3	3	3	3	3	4	4	4	4	12	19	31
1009	2022-12-23	First Year	female	14	6-8h/d	High school and blow	High school and blow	1.54545	4	1	2	4	3	4	3	3	4	4	4	4	4	3	2	3.57143	2.70563	2	3	4	3	4	3	2	3	4	9	19	28	2	3	3	2	2	3	3	3	3	9	15	24
1010	2021-12-23	First Year	male	13	6-8h/d	Undergraduate	Undergraduate	2.90909	4	1	1	3	3	3	3	2.57143	2	1	2	1	4	4	4	2.57143	2.68398	3	4	3	3	3	3	3	2	2	7	19	26	3	3	3	3	3	3	3	3	3	9	18	27
1011	2021-12-23	First Year	female	13	8-10h/d	Specialties	Specialties	1.36364	5	2	2	3	1	3	3	2.71429	3	3	1	3	3	4	4	3	2.35931	3	3	3	3	3	4	3	3	3	9	19	28	4	4	4	4	4	4	3	3	3	9	24	33
1012	2021-12-23	First Year	female	12	8-10h/d	High school and blow	High school and blow	1.86364	5	3	2	2	3	4	4	3.28571	3	2	4	2	4	1	1	2.42857	2.52597	3	4	3	2	3	3	2	2	2	6	18	24	3	3	4	3	4	3	2	2	2	6	20	26
1013	2021-12-23	First Year	female	13	6-8h/d	High school and blow	High school and blow	1.86364	4	1	2	2	4	4	4	3	2	3	1	2	2	4	4	2.57143	2.47835	2	2	2	3	4	2	4	4	4	12	15	27	1	1	1	3	3	1	4	4	4	12	10	22
1014	2021-12-23	First Year	female	13	6-8h/d	Undergraduate	Undergraduate	1.68182	4	1	2	2	3	3	3	2.57143	1	1	1	1	4	4	4	2.28571	2.17965	3	3	3	2	3	1	2	2	3	7	15	22	4	3	2	2	3	1	2	2	3	7	15	22
1015	2021-12-23	First Year	female	12	8-10h/d	High school and blow	High school and blow	1.54545	3	5	2	1	1	3	3	2.57143	2	1	1	1	2	1	1	1.28571	1.80087	3	2	3	2	3	2	3	2	4	9	15	24	3	2	3	2	3	2	3	2	4	9	15	24
1016	2021-12-23	First Year	male	12	6-8h/d	High school and blow	High school and blow	1.36364	5	1	2	1	1	1	1	1.71429	1	1	1	1	1	1	1	1	1.35931	1	1	1	1	1	1	4	4	4	12	6	18	1	1	1	1	1	1	4	4	4	12	6	18
1017	2021-12-23	First Year	female	12	6-8h/d	High school and blow	High school and blow	1.31818	5	1	2	1	1	3	2	2.14286	2	2	1	2	2	3	2	2	1.82035	2	2	3	3	3	2	3	3	2	8	15	23	2	2	2	3	3	3	3	3	3	9	15	24
1018	2021-12-23	First Year	female	12	6-8h/d	Undergraduate	Postgraduate and above	2.36364	5	3	1	3	1	3	2	2.57143	2	2	2	2	2	3	3	2.28571	2.40693	4	3	3	3	3	2	3	4	4	11	18	29	3	2	3	3	3	3	2	2	2	6	17	23
1019	2021-12-23	First Year	female	12	6-8h/d	Specialties	Specialties	2.54545	5	2	1	1	5	5	5	3.42857	4	4	4	4	4	5	5	4.28571	3.41991	3	4	4	4	4	4	3	1	3	7	23	30	3	4	4	4	4	4	3	1	3	7	23	30
1020	2021-12-23	First Year	female	11	6-8h/d	Undergraduate	High school and blow	1.63636	5	1	1	1	1	2	4	2.14286	3	3	3	3	3	2	2	2.71429	2.1645	3	3	3	2	2	2	3	3	3	9	15	24	3	3	2	2	2	2	3	3	3	9	14	23
1021	2021-12-23	First Year	female	12	8-10h/d	High school and blow	High school and blow	1.95455	3	3	3	5	1	1	3	2.71429	4	4	4	4	4	4	3	3.85714	2.84199	4	2	3	3	3	3	2	3	3	8	18	26	4	3	2	2	2	2	2	3	3	8	15	23
1022	2021-12-23	First Year	female	12	8-10h/d	High school and blow	High school and blow	1.90909	3	5	5	3	2	2	2	3.14286	3	2	2	2	2	2	3	2.28571	2.44589	3	3	3	3	3	3	2	3	3	8	18	26	3	3	3	3	3	3	2	3	3	8	18	26
1023	2021-12-23	First Year	male	13	6-8h/d	Undergraduate	Undergraduate	1.54545	5	1	1	1	1	3	1	1.85714	2	2	2	2	2	1	1	1.71429	1.70563	3	4	3	3	3	4	3	3	3	9	20	29	3	4	3	3	3	3	3	3	3	9	19	28
1024	2021-12-23	First Year	female	12	8-10h/d	Undergraduate	High school and blow	1.54545	5	1	3	2	2	2	2	2.42857	1	1	1	1	3	4	3	2	1.99134	3	3	3	3	3	3	2	2	2	6	18	24	4	2	2	2	2	3	3	3	3	9	15	24
1025	2021-12-23	First Year	male	13	8-10h/d	High school and blow	Specialties	1.86364	5	4	1	4	5	5	5	4.14286	5	5	5	2	2	5	5	4.14286	3.38312	4	4	4	4	4	4	3	3	3	9	24	33	4	4	4	4	4	4	3	3	4	10	24	34
1026	2021-12-23	First Year	female	13	8-10h/d	High school and blow	High school and blow	1.54545	4	1	1	1	2	4	2	2.14286	4	4	3	4	4	2	3	3.42857	2.37229	3	3	3	2	2	4	4	4	4	12	17	29	3	3	3	2	2	3	4	4	4	12	16	28
1027	2021-12-23	First Year	male	13	6-8h/d	High school and blow	High school and blow	1.36364	3	2	2	1	1	1	2	1.71429	2	2	2	2	1	1	2	1.71429	1.5974	3	3	3	2	2	2	3	3	3	9	15	24	3	2	3	2	2	2	2	3	3	8	14	22
1028	2021-12-23	First Year	female	13	8-10h/d	Specialties	Specialties	1.22727	5	2	1	1	1	2	2	2	3	3	1	3	3	3	2	2.57143	1.9329	3	3	3	3	1	2	3	4	4	11	15	26	3	3	3	3	1	2	3	4	4	11	15	26
1029	2021-12-23	First Year	female	13	8-10h/d	High school and blow	Specialties	2	5	3	3	4	3	4	3	3.57143	3	3	3	3	3	4	4	3.28571	2.95238	3	4	4	4	4	3	3	1	1	5	22	27	3	3	3	3	3	3	3	3	3	9	18	27
1030	2021-12-23	First Year	female	12	6-8h/d	High school and blow	High school and blow	1.77273	5	2	1	2	3	3	1	2.42857	2	3	1	4	2	1	2	2.14286	2.11472	3	3	3	3	3	3	3	3	3	9	18	27	3	3	3	3	3	3	3	3	3	9	18	27
1031	2021-12-23	Second Year	male	13	8-10h/d	High school and blow	High school and blow	1.5	5	2	3	1	1	5	2	2.71429	3	3	3	3	3	3	3	3	2.40476	3	3	3	2	2	2	3	3	3	9	15	24	2	3	3	2	3	2	2	3	3	8	15	23
1032	2021-12-23	Second Year	male	14	6-8h/d	High school and blow	High school and blow	1.72727	5	5	2	5	1	4	5	3.85714	5	5	5	5	5	5	5	5	3.52814	1	1	1	1	1	2	1	3	3	7	7	14	3	3	3	3	3	3	3	3	3	9	18	27
1033	2021-12-23	Second Year	female	13	＜6h/d	High school and blow	High school and blow	2.04545	4	2	3	3	4	2	3	3	5	4	5	4	2	3	5	4	3.01515	4	2	2	1	1	2	4	3	3	10	12	22	4	3	2	3	1	2	3	3	3	9	15	24
1034	2021-12-23	Second Year	male	14	8-10h/d	High school and blow	High school and blow	1.45455	5	1	1	5	3	4	3	3.14286	5	5	5	5	5	3	5	4.71429	3.1039	3	3	2	3	2	2	2	3	2	7	15	22	2	2	4	2	2	2	3	3	3	9	14	23
1035	2021-12-23	Second Year	female	13	6-8h/d	High school and blow	High school and blow	1.27273	5	2	2	1	2	4	5	3	4	3	4	4	4	2	2	3.28571	2.51948	4	3	4	3	2	4	2	2	3	7	20	27	4	4	3	3	1	3	2	2	2	6	18	24
1036	2021-12-23	Second Year	female	15	＜6h/d	Postgraduate and above	Specialties	1.86364	1	1	5	1	1	2	2	1.85714	1	1	1	1	1	2	4	1.57143	1.76407	4	2	4	2	2	4	3	3	4	10	18	28	1	4	4	4	3	3	2	4	1	7	19	26
1037	2021-12-23	Second Year	male	13	6-8h/d	High school and blow	High school and blow	1.72727	5	5	5	5	5	5	4	4.85714	5	5	5	5	5	5	5	5	3.86147	3	3	3	3	3	2	2	2	2	6	17	23	2	2	2	2	2	2	3	3	3	9	12	21
1038	2021-12-23	Second Year	male	13	8-10h/d	High school and blow	High school and blow	2.04545	3	5	1	1	1	2	1	2	1	1	1	4	4	5	5	3	2.34848	1	1	1	1	1	3	4	2	4	10	8	18	1	1	1	1	1	1	4	2	2	8	6	14
1039	2021-12-23	Second Year	male	14	8-10h/d	Undergraduate	Specialties	2.59091	5	4	3	5	4	4	3	4	4	4	4	4	4	4	4	4	3.5303	4	3	3	3	4	3	4	4	4	12	20	32	4	3	3	4	4	3	4	4	4	12	21	33
1040	2021-12-23	Second Year	female	13	6-8h/d	High school and blow	High school and blow	1.31818	5	1	2	1	1	4	3	2.42857	5	3	5	4	5	2	2	3.71429	2.48701	4	3	3	4	1	1	4	4	4	12	16	28	4	4	4	1	1	1	4	4	4	12	15	27
1041	2021-12-23	Second Year	male	14	6-8h/d	High school and blow	High school and blow	1.77273	5	1	5	5	5	5	5	4.42857	5	5	5	5	5	5	5	5	3.73377	2	1	1	1	1	1	4	4	4	12	7	19	1	1	1	1	1	1	4	4	4	12	6	18
1042	2021-12-23	Second Year	female	13	6-8h/d	High school and blow	High school and blow	1.59091	5	2	2	1	1	2	2	2.14286	1	1	1	2	1	1	3	1.42857	1.72078	2	2	2	2	2	2	4	4	4	12	12	24	2	2	2	2	2	2	3	4	4	11	12	23
1043	2021-12-23	Second Year	female	13	8-10h/d	High school and blow	High school and blow	1.68182	5	1	3	1	1	4	4	2.71429	3	3	3	3	3	3	3	3	2.46537	4	4	4	2	2	2	3	3	3	9	18	27	2	2	2	2	2	2	3	3	3	9	12	21
1044	2021-12-23	Second Year	female	13	6-8h/d	Specialties	Undergraduate	1.63636	5	1	2	1	2	4	4	2.71429	2	2	2	2	2	3	3	2.28571	2.21212	3	3	3	3	3	3	2	2	3	7	18	25	3	3	2	3	3	2	2	2	3	7	16	23
1045	2021-12-23	Second Year	female	14	6-8h/d	Undergraduate	Undergraduate	2.63636	5	5	2	1	3	3	3	3.14286	5	4	4	4	4	4	4	4.14286	3.30736	3	4	4	2	2	3	4	3	3	10	18	28	4	4	4	4	3	2	4	3	3	10	21	31
1046	2021-12-23	Second Year	female	13	6-8h/d	High school and blow	High school and blow	2.22727	5	5	5	4	4	1	4	4	3	1	1	4	1	1	1	1.71429	2.64719	1	3	1	4	1	2	4	3	3	10	12	22	2	2	2	2	1	2	4	4	3	11	11	22
1047	2021-12-23	Second Year	female	13	6-8h/d	High school and blow	High school and blow	1.81818	4	3	2	1	3	2	2	2.42857	2	1	2	3	2	3	3	2.28571	2.17749	3	3	3	3	4	3	2	3	2	7	19	26	3	3	3	3	3	3	3	3	3	9	18	27
1048	2021-12-23	Second Year	male	13	8-10h/d	High school and blow	High school and blow	1.09091	3	1	1	1	1	4	2	1.85714	1	1	1	2	1	1	2	1.28571	1.41126	3	3	3	3	3	3	2	2	2	6	18	24	3	3	3	3	3	3	2	2	2	6	18	24
1049	2021-12-23	Second Year	male	13	6-8h/d	High school and blow	Undergraduate	1.36364	3	1	1	1	1	4	2	1.85714	1	1	1	2	1	3	3	1.71429	1.64502	3	3	3	3	3	3	2	2	2	6	18	24	3	3	3	3	3	3	2	2	2	6	18	24
1050	2021-12-23	Second Year	female	13	6-8h/d	High school and blow	High school and blow	1.18182	5	1	3	1	1	2	3	2.28571	2	2	2	2	2	2	2	2	1.82251	3	2	3	3	2	2	4	4	4	12	15	27	4	3	3	3	3	3	4	4	4	12	19	31
1051	2021-12-23	Second Year	male	13	6-8h/d	Specialties	High school and blow	1.54545	5	1	2	1	3	5	4	3	2	3	3	3	4	4	4	3.28571	2.61039	4	4	4	1	1	1	1	1	1	3	15	18	4	4	4	1	1	1	1	1	1	3	15	18
1052	2021-12-23	Second Year	male	13	8-10h/d	High school and blow	High school and blow	1.63636	3	1	1	1	1	3	2	1.71429	3	3	3	3	4	4	4	3.42857	2.25974	3	3	3	3	3	3	2	3	3	8	18	26	3	3	3	3	3	3	2	3	3	8	18	26
1053	2021-12-23	Second Year	male	13	6-8h/d	Specialties	Specialties	1.40909	5	5	4	1	1	3	3	3.14286	2	3	2	3	2	1	2	2.14286	2.2316	3	3	2	3	3	3	3	3	3	9	17	26	3	3	3	3	2	2	3	3	3	9	16	25
1054	2021-12-23	Second Year	female	13	8-10h/d	Specialties	Specialties	1.31818	4	1	2	1	1	3	2	2	1	1	1	1	1	3	2	1.42857	1.58225	3	3	3	3	2	3	2	2	3	7	17	24	3	3	3	3	2	2	2	2	3	7	16	23
1055	2021-12-23	Second Year	male	14	＜6h/d	Specialties	Specialties	1.13636	3	2	1	1	1	2	1	1.57143	1	1	1	1	1	1	1	1	1.23593	3	2	2	2	1	1	1	4	3	8	11	19	2	2	2	3	2	3	2	3	3	8	14	22
1056	2021-12-23	Second Year	female	15	6-8h/d	High school and blow	High school and blow	3.31818	5	4	4	2	2	3	5	3.57143	5	5	1	5	2	3	3	3.42857	3.43939	4	4	4	4	4	1	4	4	4	12	21	33	4	4	4	4	4	1	4	4	4	12	21	33
1057	2021-12-23	Second Year	female	13	6-8h/d	Specialties	Specialties	3.13636	5	4	4	2	2	3	5	3.57143	5	5	1	5	2	3	3	3.42857	3.37879	4	4	4	4	4	1	4	4	4	12	21	33	4	4	4	4	4	1	4	4	4	12	21	33
1058	2021-12-23	Second Year	female	14	6-8h/d	High school and blow	High school and blow	1.27273	3	3	2	1	1	1	1	1.71429	1	1	1	1	1	1	2	1.14286	1.37662	3	2	2	2	2	2	3	3	3	9	13	22	3	2	2	2	2	2	3	3	3	9	13	22
1059	2021-12-23	Second Year	male	15	8-10h/d	High school and blow	High school and blow	1	5	1	3	1	1	1	2	2	1	1	1	1	1	1	1	1	1.33333	2	2	2	2	2	2	2	3	2	7	12	19	2	2	2	2	2	2	1	3	1	5	12	17
1060	2021-12-23	Second Year	female	13	＜6h/d	High school and blow	High school and blow	1.77273	4	1	1	1	1	3	3	2	3	3	2	4	2	3	4	3	2.25758	3	3	2	2	4	2	3	3	3	9	16	25	3	3	2	2	4	2	3	3	3	9	16	25
1061	2021-12-23	Second Year	female	13	8-10h/d	High school and blow	High school and blow	1.54545	4	2	2	1	1	3	1	2	1	1	1	1	1	1	1	1	1.51515	2	2	2	2	2	2	3	3	3	9	12	21	2	2	2	1	1	2	4	4	4	12	10	22
1062	2021-12-23	Second Year	male	13	6-8h/d	Specialties	Specialties	1.72727	4	2	2	2	1	2	2	2.14286	3	2	1	1	4	5	5	3	2.29004	4	3	3	3	4	3	3	3	3	9	20	29	4	4	4	4	4	4	1	1	1	3	24	27
1063	2021-12-23	Second Year	male	14	6-8h/d	High school and blow	High school and blow	1.31818	4	3	2	1	3	5	5	3.28571	4	4	4	4	4	4	4	4	2.86797	2	2	2	3	3	3	2	2	3	7	15	22	3	3	3	3	3	3	2	2	3	7	18	25
1064	2021-12-23	Second Year	female	16	6-8h/d	High school and blow	High school and blow	1.54545	5	1	2	3	1	5	4	3	2	2	2	3	2	4	4	2.71429	2.41991	4	4	4	4	2	4	3	3	3	9	22	31	4	4	4	4	4	4	4	4	4	12	24	36
1065	2021-12-23	Second Year	female	13	6-8h/d	High school and blow	High school and blow	1.68182	5	1	1	3	3	3	3	2.71429	2	2	2	2	2	1	1	1.71429	2.0368	4	4	4	1	1	2	4	4	4	12	16	28	4	4	4	1	1	2	4	4	4	12	16	28
1066	2021-12-23	Second Year	male	14	6-8h/d	High school and blow	High school and blow	2.09091	5	4	4	3	3	4	2	3.57143	3	3	3	3	3	3	3	3	2.88745	3	3	3	3	3	3	3	3	3	9	18	27	3	3	3	3	3	3	3	3	3	9	18	27
1067	2021-12-23	Second Year	female	14	＜6h/d	Specialties	Specialties	1.5	5	1	2	1	2	3	4	2.57143	3	3	2	2	1	1	2	2	2.02381	2	3	2	2	3	2	3	3	3	9	14	23	2	2	2	2	2	2	3	3	3	9	12	21
1068	2021-12-23	Second Year	male	14	6-8h/d	High school and blow	High school and blow	1.40909	4	1	2	1	1	2	1	1.71429	2	2	2	2	2	1	1	1.71429	1.61255	1	1	1	1	1	1	4	4	4	12	6	18	1	1	1	1	1	1	4	4	4	12	6	18
1069	2021-12-23	Second Year	female	14	6-8h/d	High school and blow	High school and blow	1.40909	5	1	2	2	1	3	4	2.57143	3	3	3	3	3	2	2	2.71429	2.2316	4	4	4	4	4	4	4	4	4	12	24	36	4	4	4	4	4	4	4	4	4	12	24	36
1070	2021-12-23	Second Year	male	13	6-8h/d	Specialties	High school and blow	1.90909	4	2	2	2	1	4	3	2.57143	2	2	2	2	2	4	4	2.57143	2.35065	3	3	3	3	3	3	3	3	3	9	18	27	3	3	3	3	3	3	3	3	3	9	18	27
1071	2021-12-23	Second Year	male	13	6-8h/d	High school and blow	High school and blow	1.59091	5	4	3	3	2	3	1	3	2	2	3	3	3	4	1	2.57143	2.38745	2	2	2	2	3	2	3	3	4	10	13	23	3	2	2	2	3	2	4	4	4	12	14	26
1072	2021-12-23	Second Year	male	14	6-8h/d	High school and blow	High school and blow	1.27273	5	2	1	1	2	3	2	2.28571	2	2	2	2	2	2	2	2	1.85281	3	3	3	2	2	3	2	2	3	7	16	23	3	3	3	2	2	3	2	2	3	7	16	23
1073	2021-12-23	Second Year	female	13	8-10h/d	High school and blow	High school and blow	1.77273	5	3	2	4	3	5	3	3.57143	3	3	3	3	3	4	4	3.28571	2.87662	3	3	3	3	3	3	3	3	3	9	18	27	3	3	3	3	3	3	3	3	3	9	18	27
1074	2021-12-23	Second Year	male	14	6-8h/d	High school and blow	Specialties	1.27273	5	4	1	1	1	4	2	2.57143	1	2	2	2	2	2	2	1.85714	1.90043	4	4	4	4	4	4	1	1	1	3	24	27	4	4	4	4	4	4	1	1	1	3	24	27
1075	2021-12-23	Second Year	female	14	＜6h/d	Specialties	Undergraduate	1.45455	5	2	3	1	2	3	3	2.71429	1	3	3	4	2	4	4	3	2.38961	3	4	4	4	4	4	4	4	1	9	23	32	2	3	3	3	4	2	4	4	1	9	17	26
1076	2021-12-23	Second Year	female	14	6-8h/d	Undergraduate	Undergraduate	1.27273	4	1	1	1	1	1	2	1.57143	1	1	1	1	1	1	1	1	1.28139	4	4	4	4	4	4	3	4	4	11	24	35	4	4	4	4	4	4	3	4	4	11	24	35
1077	2021-12-23	Second Year	male	13	6-8h/d	High school and blow	High school and blow	1.13636	4	2	3	1	1	3	2	2.28571	1	1	1	1	1	1	1	1	1.47403	2	2	2	2	2	2	3	3	3	9	12	21	2	2	2	2	2	2	3	3	3	9	12	21
1078	2021-12-23	Second Year	female	13	6-8h/d	High school and blow	High school and blow	1.59091	4	2	2	1	1	4	2	2.28571	2	2	2	2	3	4	4	2.71429	2.19697	3	3	3	4	2	4	2	1	3	6	19	25	3	3	3	4	2	2	2	1	3	6	17	23
1079	2021-12-23	Second Year	female	13	6-8h/d	Specialties	Specialties	2.63636	4	4	3	4	4	4	3	3.71429	3	2	2	2	2	2	3	2.28571	2.87879	4	4	4	4	4	4	4	4	4	12	24	36	4	4	4	4	4	4	4	4	4	12	24	36
1080	2021-12-23	Second Year	male	14	6-8h/d	High school and blow	High school and blow	1.95455	5	5	3	1	2	5	5	3.71429	1	1	1	5	5	5	5	3.28571	2.98485	4	4	3	1	3	3	4	1	4	9	18	27	4	4	3	1	3	3	4	1	4	9	18	27
1081	2021-12-23	Second Year	female	13	＜6h/d	Undergraduate	Undergraduate	1.81818	5	1	1	2	5	5	5	3.42857	1	1	1	1	1	2	2	1.28571	2.17749	1	1	1	1	3	1	3	3	4	10	8	18	3	2	3	3	1	2	3	3	3	9	14	23
1082	2021-12-23	Second Year	female	13	6-8h/d	Specialties	Specialties	1.72727	5	1	1	2	1	3	2	2.14286	4	4	4	4	4	2	2	3.42857	2.4329	3	3	4	3	3	3	3	3	3	9	19	28	3	3	4	3	3	3	3	3	3	9	19	28
1083	2021-12-23	Second Year	female	13	6-8h/d	High school and blow	High school and blow	2	3	4	3	4	4	4	3	3.57143	4	4	4	4	4	3	3	3.71429	3.09524	3	3	3	2	3	3	2	2	2	6	17	23	3	3	3	3	3	3	2	3	3	8	18	26
1084	2021-12-23	Second Year	male	14	6-8h/d	Specialties	Specialties	1.81818	3	2	1	1	1	4	3	2.14286	2	3	2	3	3	1	2	2.28571	2.08225	2	2	2	3	3	3	4	4	4	12	15	27	2	2	2	2	3	2	4	4	4	12	13	25
1085	2021-12-23	Second Year	female	13	6-8h/d	High school and blow	High school and blow	1.72727	4	3	1	1	2	4	4	2.71429	2	2	3	4	2	3	3	2.71429	2.38528	3	3	4	3	4	3	2	2	3	7	20	27	4	3	3	3	4	3	2	2	3	7	20	27
1086	2021-12-23	Second Year	male	14	6-8h/d	Undergraduate	Undergraduate	1.27273	4	1	1	1	1	1	2	1.57143	1	1	1	1	1	1	1	1	1.28139	4	4	4	4	4	3	3	4	4	11	23	34	4	4	4	4	4	4	3	4	4	11	24	35
1087	2021-12-23	Second Year	male	13	6-8h/d	High school and blow	High school and blow	2.09091	5	1	1	1	1	4	4	2.42857	2	3	2	2	5	5	5	3.42857	2.64935	4	4	4	2	3	2	4	4	4	12	19	31	2	2	2	3	2	2	3	3	3	9	13	22
1088	2021-12-23	Second Year	female	14	6-8h/d	High school and blow	High school and blow	1.54545	4	1	1	1	1	2	1	1.57143	1	2	1	2	3	2	4	2.14286	1.75325	1	2	3	2	2	3	3	3	4	10	13	23	1	3	3	3	3	2	2	2	2	6	15	21
1089	2021-12-23	Second Year	male	13	＜6h/d	Undergraduate	High school and blow	1.45455	5	1	1	1	1	3	1	1.85714	2	2	2	2	2	2	2	2	1.77056	2	2	2	2	3	2	2	2	2	6	13	19	2	2	2	2	2	2	2	2	2	6	12	18
1090	2021-12-23	Second Year	female	14	6-8h/d	High school and blow	High school and blow	1.54545	4	1	1	1	1	3	2	1.85714	1	1	2	1	2	3	2	1.71429	1.70563	3	4	4	2	2	2	3	3	3	9	17	26	1	2	2	2	2	2	3	3	3	9	11	20
1091	2021-12-23	Second Year	male	14	6-8h/d	High school and blow	High school and blow	1.36364	3	1	1	2	4	4	3	2.57143	4	4	4	4	1	4	1	3.14286	2.35931	3	2	2	2	2	3	3	3	3	9	14	23	4	2	2	2	2	3	3	2	3	8	15	23
1092	2021-12-23	Second Year	female	14	6-8h/d	High school and blow	Undergraduate	1.5	5	1	1	2	2	4	3	2.57143	2	3	2	2	4	5	5	3.28571	2.45238	3	3	3	2	2	3	3	3	3	9	16	25	3	3	3	2	2	3	3	3	3	9	16	25
1093	2021-12-23	Second Year	female	13	6-8h/d	Undergraduate	Undergraduate	1.63636	1	1	2	2	2	3	2	1.85714	1	1	1	1	1	1	1	1	1.49784	3	3	3	3	3	3	2	3	3	8	18	26	3	3	3	3	3	3	2	3	3	8	18	26
1094	2021-12-23	Second Year	male	18	8-10h/d	High school and blow	High school and blow	1.68182	5	5	5	3	4	5	4	4.42857	3	4	2	3	4	3	1	2.85714	2.98918	3	3	3	2	4	2	2	3	4	9	17	26	2	3	3	3	3	3	2	2	2	6	17	23
1095	2021-12-23	Second Year	male	13	6-8h/d	High school and blow	High school and blow	1.68182	5	1	2	1	1	3	2	2.14286	1	1	1	1	1	1	2	1.14286	1.65584	3	3	3	3	3	3	4	4	4	12	18	30	3	3	3	3	3	3	4	4	4	12	18	30
1096	2021-12-23	Second Year	female	14	6-8h/d	High school and blow	High school and blow	1.86364	5	1	1	4	4	5	4	3.42857	3	1	4	2	1	4	5	2.85714	2.71645	1	1	1	1	3	2	3	3	3	9	9	18	1	4	2	1	1	2	3	3	3	9	11	20
1097	2021-12-23	Second Year	female	13	6-8h/d	High school and blow	High school and blow	2.5	5	4	2	4	4	5	5	4.14286	4	4	4	4	4	4	4	4	3.54762	4	4	4	4	3	3	3	3	3	9	22	31	4	4	4	4	3	3	4	4	4	12	22	34
1098	2021-12-23	Second Year	female	13	6-8h/d	Specialties	Specialties	1.45455	1	1	2	1	1	4	2	1.71429	1	1	1	1	1	2	2	1.28571	1.48485	1	4	4	3	3	2	4	4	3	11	17	28	1	4	4	3	3	2	4	4	3	11	17	28
1099	2021-12-23	Second Year	male	14	8-10h/d	High school and blow	High school and blow	1.22727	3	2	2	2	2	3	2	2.28571	2	2	2	2	3	3	3	2.42857	1.98052	3	3	3	2	2	3	3	3	3	9	16	25	3	3	3	2	2	3	3	3	3	9	16	25
1100	2021-12-23	Second Year	male	14	6-8h/d	Undergraduate	Undergraduate	1.22727	4	1	1	1	1	2	3	1.85714	1	1	1	1	1	2	2	1.28571	1.45671	3	3	3	3	3	3	4	4	4	12	18	30	3	3	3	3	3	3	4	4	4	12	18	30
1101	2021-12-23	Second Year	female	15	＜6h/d	High school and blow	High school and blow	1.77273	5	1	2	1	1	5	2	2.42857	4	4	4	5	5	5	5	4.57143	2.92424	2	2	2	2	2	2	3	3	3	9	12	21	2	2	2	2	2	2	3	3	3	9	12	21
1102	2021-12-23	Second Year	male	14	6-8h/d	Undergraduate	Undergraduate	1.72727	4	2	2	5	5	5	3	3.71429	5	5	5	5	5	5	5	5	3.48052	1	1	1	1	1	1	3	3	3	9	6	15	1	1	1	1	1	1	3	3	3	9	6	15
1103	2021-12-23	Second Year	male	14	8-10h/d	High school and blow	High school and blow	1.31818	5	5	5	4	3	5	5	4.57143	5	5	5	5	5	5	5	5	3.62987	4	3	3	2	2	2	2	3	2	7	16	23	3	3	2	3	3	3	3	3	3	9	17	26
1104	2021-12-23	Second Year	male	13	6-8h/d	High school and blow	High school and blow	1.54545	5	1	1	1	2	5	3	2.57143	3	3	3	3	3	3	3	3	2.37229	3	3	3	3	3	3	2	2	2	6	18	24	3	3	3	3	3	3	2	2	2	6	18	24
1105	2021-12-23	Second Year	female	14	6-8h/d	High school and blow	High school and blow	1.81818	5	3	4	2	2	4	2	3.14286	5	5	5	1	5	1	1	3.28571	2.74892	3	3	3	2	2	3	3	3	2	8	16	24	3	2	3	2	2	3	2	2	2	6	15	21
1106	2021-12-23	Second Year	male	14	8-10h/d	High school and blow	High school and blow	1.40909	4	4	5	3	3	5	3	3.85714	5	5	5	5	5	5	2	4.57143	3.27922	1	1	1	1	1	1	4	4	4	12	6	18	1	1	1	1	1	1	4	4	4	12	6	18
1107	2021-12-23	Second Year	female	14	6-8h/d	Specialties	Specialties	2.13636	4	1	1	1	3	3	2	2.14286	1	1	1	1	1	1	2	1.14286	1.80736	4	4	4	4	4	4	1	1	1	3	24	27	4	4	4	4	4	4	1	1	1	3	24	27
1108	2021-12-23	Second Year	female	13	＜6h/d	Undergraduate	Specialties	1.45455	5	1	1	1	1	4	1	2	2	2	2	1	2	1	1	1.57143	1.67532	3	1	1	1	1	1	2	2	2	6	8	14	1	3	3	1	1	1	3	3	3	9	10	19
1109	2021-12-23	Second Year	male	14	6-8h/d	Specialties	High school and blow	1.09091	3	1	1	1	1	1	1	1.28571	1	1	1	1	1	4	2	1.57143	1.31602	4	4	4	4	4	4	1	1	1	3	24	27	4	4	4	4	4	4	1	1	1	3	24	27
1110	2021-12-23	Second Year	male	14	＞10h/d	Specialties	Specialties	1	2	1	1	1	1	1	1	1.14286	1	1	1	1	1	1	1	1	1.04762	4	4	4	4	4	4	1	1	1	3	24	27	4	4	4	4	4	4	1	1	1	3	24	27
1111	2021-12-23	Second Year	female	13	6-8h/d	Undergraduate	Specialties	1.63636	4	1	2	1	1	2	1	1.71429	2	2	2	2	2	1	1	1.71429	1.68831	3	3	2	1	1	1	4	3	3	10	11	21	3	1	1	1	1	1	3	3	3	9	8	17
1112	2021-12-23	Second Year	male	14	8-10h/d	Undergraduate	Specialties	1.72727	5	1	1	3	2	5	4	3	2	2	2	2	2	2	2	2	2.24242	2	2	3	4	4	2	3	3	3	9	17	26	4	4	4	3	3	2	2	3	2	7	20	27
1113	2021-12-23	Second Year	male	14	8-10h/d	High school and blow	High school and blow	1.31818	4	5	4	5	5	5	2	4.28571	4	4	4	4	4	1	1	3.14286	2.91558	3	3	3	3	3	3	2	2	2	6	18	24	3	3	3	3	3	3	2	2	3	7	18	25
1114	2021-12-23	Second Year	female	13	6-8h/d	Undergraduate	Undergraduate	1.72727	5	5	5	5	3	2	4	4.14286	4	4	4	4	4	2	3	3.57143	3.14719	3	3	3	3	3	3	3	3	3	9	18	27	3	3	3	3	3	3	3	3	3	9	18	27
1115	2021-12-23	Second Year	female	15	6-8h/d	High school and blow	High school and blow	2.18182	5	1	1	1	1	5	3	2.42857	4	3	4	1	4	3	2	3	2.5368	3	3	3	2	2	3	3	3	3	9	16	25	3	3	3	3	2	3	3	3	3	9	17	26
1116	2021-12-23	Second Year	male	13	8-10h/d	High school and blow	Undergraduate	1.54545	4	3	3	3	3	5	3	3.42857	4	4	3	2	4	4	4	3.57143	2.84848	3	2	2	4	4	2	3	1	3	7	17	24	2	2	2	2	3	4	2	1	3	6	15	21
1117	2021-12-23	Second Year	female	13	＜6h/d	Postgraduate and above	Undergraduate	1.81818	5	2	1	3	5	4	3	3.28571	3	3	3	3	3	3	3	3	2.7013	4	4	4	4	4	4	3	3	3	9	24	33	3	3	4	4	4	2	2	3	2	7	20	27
1118	2021-12-23	Second Year	male	13	＜6h/d	Undergraduate	Undergraduate	1.63636	3	2	3	1	3	5	4	3	2	2	3	4	3	5	1	2.85714	2.49784	2	2	2	2	3	2	3	3	3	9	13	22	2	2	2	3	3	2	3	3	3	9	14	23
1119	2021-12-23	Second Year	female	13	＜6h/d	High school and blow	High school and blow	2.54545	5	2	2	2	5	5	2	3.28571	2	3	3	1	4	5	5	3.28571	3.03896	4	4	4	4	4	4	1	1	1	3	24	27	3	4	4	4	4	3	2	1	1	4	22	26
1120	2021-12-23	Second Year	female	13	6-8h/d	High school and blow	High school and blow	1.81818	5	2	1	1	3	3	2	2.42857	4	4	1	1	4	2	2	2.57143	2.27273	3	4	3	3	4	3	1	2	3	6	20	26	2	2	2	3	3	3	2	2	3	7	15	22
1121	2021-12-23	Second Year	female	15	＜6h/d	High school and blow	High school and blow	1.95455	4	1	1	3	3	5	3	2.85714	4	4	4	4	4	4	4	4	2.93723	3	3	3	3	3	3	3	3	3	9	18	27	3	3	3	3	3	3	3	3	3	9	18	27
1122	2021-12-23	Second Year	female	13	8-10h/d	High school and blow	High school and blow	1.40909	3	2	2	1	1	1	2	1.71429	4	1	4	1	4	1	1	2.28571	1.80303	4	4	4	4	1	1	1	4	1	6	18	24	4	4	4	1	1	1	1	4	2	7	15	22
1123	2021-12-23	Second Year	female	14	6-8h/d	Specialties	Specialties	2.63636	5	3	1	1	2	2	2	2.28571	5	5	5	3	5	3	3	4.14286	3.02165	3	3	3	3	3	3	3	3	3	9	18	27	3	3	3	3	3	3	3	3	3	9	18	27
1124	2021-12-23	Second Year	male	13	8-10h/d	High school and blow	High school and blow	4.40909	5	4	4	5	5	5	4	4.57143	5	5	5	5	5	5	5	5	4.66017	4	4	4	4	4	4	2	2	2	6	24	30	4	4	4	4	4	4	2	2	2	6	24	30
1125	2021-12-23	Second Year	female	15	8-10h/d	High school and blow	High school and blow	1.81818	3	1	2	2	3	3	2	2.28571	3	3	3	3	3	2	2	2.71429	2.27273	3	4	4	3	2	3	4	4	4	12	19	31	4	3	3	3	2	2	4	4	4	12	17	29
1126	2021-12-23	Second Year	female	15	＜6h/d	High school and blow	High school and blow	1.31818	5	1	1	1	1	3	2	2	1	1	2	1	3	3	1	1.71429	1.67749	1	4	4	2	1	3	1	4	1	6	15	21	1	4	4	2	1	3	1	4	1	6	15	21
1127	2021-12-23	Second Year	male	13	6-8h/d	Specialties	Specialties	1.63636	5	4	4	1	1	3	3	3	2	2	2	2	2	4	4	2.57143	2.4026	3	3	3	3	3	3	2	2	2	6	18	24	3	3	3	3	3	3	3	3	3	9	18	27
1128	2021-12-23	Second Year	female	15	6-8h/d	High school and blow	High school and blow	1.72727	4	2	3	1	1	5	1	2.42857	3	3	3	1	3	3	1	2.42857	2.19481	3	2	2	3	3	1	4	4	4	12	14	26	3	3	3	3	3	1	4	4	4	12	16	28
1129	2021-12-23	Second Year	female	15	6-8h/d	High school and blow	High school and blow	1.72727	5	2	4	2	3	3	2	3	1	1	2	1	1	3	3	1.71429	2.14719	4	4	4	3	3	3	4	4	4	12	21	33	4	4	4	4	3	3	4	4	4	12	22	34
1130	2021-12-23	Second Year	female	13	6-8h/d	Undergraduate	Undergraduate	1.72727	4	1	2	2	2	3	2	2.28571	2	2	2	2	2	3	3	2.28571	2.09957	3	3	3	3	3	2	3	2	4	9	17	26	2	2	2	3	2	2	3	3	4	10	13	23
1131	2021-12-23	Second Year	female	13	6-8h/d	Specialties	Specialties	1.90909	5	1	1	1	1	1	2	1.71429	2	2	2	2	2	2	2	2	1.87446	4	4	4	3	3	4	4	4	4	12	22	34	2	2	1	3	3	1	3	3	3	9	12	21
1132	2021-12-23	Second Year	female	13	＜6h/d	Specialties	Specialties	1.45455	5	1	5	1	1	3	2	2.57143	4	4	4	4	4	5	5	4.28571	2.77056	4	1	1	1	1	3	4	4	4	12	11	23	1	1	1	1	1	1	4	4	4	12	6	18
1133	2021-12-23	Second Year	female	13	＜6h/d	High school and blow	High school and blow	1.27273	4	1	1	2	1	1	2	1.71429	3	3	2	1	3	1	1	2	1.66234	1	1	1	1	1	1	1	1	1	3	6	9	3	3	3	3	3	1	4	4	4	12	16	28
1134	2021-12-23	Second Year	female	13	6-8h/d	High school and blow	High school and blow	2.22727	4	3	1	2	1	4	2	2.42857	3	3	3	3	3	4	5	3.42857	2.69481	2	2	2	2	2	2	3	3	3	9	12	21	2	2	2	3	2	3	2	2	3	7	14	21
1135	2021-12-23	Second Year	female	14	8-10h/d	Specialties	Specialties	2.04545	3	1	1	2	1	2	2	1.71429	2	3	2	3	2	4	1	2.42857	2.06277	3	3	3	3	4	4	1	2	2	5	20	25	3	3	3	4	3	4	1	1	2	4	20	24
1136	2021-12-23	Second Year	female	13	6-8h/d	Undergraduate	Undergraduate	1	3	2	2	2	1	1	2	1.85714	2	2	2	2	2	2	2	2	1.61905	3	3	3	3	3	3	3	3	3	9	18	27	3	3	3	3	3	3	3	3	3	9	18	27
1137	2021-12-23	Third Year	male	15	6-8h/d	Specialties	High school and blow	1.72727	5	1	1	2	1	3	1	2	1	1	2	1	3	3	3	2	1.90909	3	3	3	1	1	3	3	4	3	10	14	24	1	1	1	1	1	1	4	4	4	12	6	18
1138	2021-12-23	Third Year	female	14	＜6h/d	High school and blow	High school and blow	1.13636	4	1	1	1	2	2	2	1.85714	3	3	3	3	3	2	3	2.85714	1.95022	3	3	3	3	3	3	3	3	3	9	18	27	3	3	3	3	3	3	3	3	3	9	18	27
1139	2021-12-23	Third Year	female	14	6-8h/d	High school and blow	High school and blow	2.68182	5	4	5	5	5	5	5	4.85714	5	5	5	5	5	4	5	4.85714	4.13203	4	4	4	4	4	4	4	4	4	12	24	36	4	4	4	4	4	4	4	4	4	12	24	36
1140	2021-12-23	Third Year	female	14	6-8h/d	High school and blow	High school and blow	1	2	2	1	2	2	2	2	1.85714	1	2	1	1	1	2	2	1.42857	1.42857	2	1	1	4	3	1	4	4	4	12	12	24	1	1	1	2	3	3	4	4	4	12	11	23
1141	2021-12-23	Third Year	male	14	6-8h/d	High school and blow	High school and blow	2.59091	5	2	1	2	2	3	1	2.28571	1	1	5	2	5	5	5	3.42857	2.7684	2	2	2	2	2	2	3	3	3	9	12	21	2	2	2	2	2	2	3	3	3	9	12	21
1142	2021-12-23	Third Year	female	14	6-8h/d	High school and blow	High school and blow	1.27273	4	1	1	1	3	2	3	2.14286	4	4	1	1	4	2	2	2.57143	1.99567	2	2	2	3	2	2	3	3	3	9	13	22	1	1	1	1	1	1	4	4	4	12	6	18
1143	2021-12-23	Third Year	female	14	6-8h/d	High school and blow	High school and blow	1.18182	1	1	1	1	1	1	1	1	1	1	1	1	1	1	1	1	1.06061	3	3	3	3	3	3	2	2	3	7	18	25	3	3	3	2	2	2	3	3	3	9	15	24
1144	2021-12-23	Third Year	female	15	6-8h/d	Specialties	Specialties	2.5	5	1	1	1	1	1	2	1.71429	3	3	3	3	3	3	3	3	2.40476	3	3	3	3	3	3	2	2	2	6	18	24	2	2	2	2	2	2	3	3	3	9	12	21
1145	2021-12-23	Third Year	female	14	6-8h/d	High school and blow	High school and blow	1.18182	5	1	2	2	1	5	2	2.57143	1	1	1	1	1	1	1	1	1.58442	3	2	3	1	1	3	2	2	4	8	13	21	3	2	2	2	2	2	2	2	3	7	13	20
1146	2021-12-23	Third Year	male	14	＜6h/d	Specialties	Undergraduate	1.18182	5	1	1	2	2	3	1	2.14286	1	1	1	1	2	2	2	1.42857	1.58442	1	1	1	1	1	1	4	4	4	12	6	18	1	1	1	1	1	1	4	4	4	12	6	18
1147	2021-12-23	Third Year	female	14	＜6h/d	Specialties	Undergraduate	1.90909	4	1	1	1	4	4	3	2.57143	1	1	1	1	1	1	1	1	1.82684	3	3	3	4	4	2	4	4	4	12	19	31	4	4	4	4	2	2	4	4	4	12	20	32
1148	2021-12-23	Third Year	male	14	＜6h/d	Specialties	Specialties	1.54545	5	1	1	1	1	5	5	2.71429	3	3	3	3	3	3	1	2.71429	2.32468	1	1	1	1	1	1	4	4	4	12	6	18	1	1	1	1	1	1	4	4	4	12	6	18
1149	2021-12-23	Third Year	male	15	6-8h/d	Specialties	Undergraduate	2.13636	4	1	1	4	5	5	4	3.42857	3	3	4	2	3	4	4	3.28571	2.95022	3	3	3	3	3	2	3	3	3	9	17	26	3	3	3	3	3	2	3	3	3	9	17	26
1150	2021-12-23	Third Year	female	14	＜6h/d	High school and blow	High school and blow	1.77273	5	1	1	2	3	4	3	2.71429	3	3	3	3	3	4	4	3.28571	2.59091	4	4	4	4	4	4	4	4	4	12	24	36	4	4	4	4	4	4	4	4	4	12	24	36
1151	2021-12-23	Third Year	female	14	8-10h/d	High school and blow	High school and blow	1.59091	5	4	2	1	3	4	2	3	3	3	4	3	2	3	4	3.14286	2.57792	4	4	4	4	3	4	3	4	4	11	23	34	4	4	4	4	3	4	3	4	4	11	23	34
1152	2021-12-23	Third Year	female	14	6-8h/d	Specialties	Specialties	2.18182	5	1	2	2	4	4	2	2.85714	3	3	3	3	3	4	4	3.28571	2.77489	4	4	4	4	4	4	1	1	1	3	24	27	4	4	4	4	4	4	1	1	1	3	24	27
1153	2021-12-23	Third Year	male	15	＜6h/d	High school and blow	High school and blow	1.31818	5	1	2	1	4	4	4	3	3	3	3	3	3	1	1	2.42857	2.24892	1	1	1	1	1	1	4	4	4	12	6	18	1	1	1	1	1	1	4	4	4	12	6	18
1154	2021-12-23	Third Year	male	15	＜6h/d	High school and blow	Undergraduate	1.40909	3	1	1	1	1	3	2	1.71429	1	1	1	1	1	5	1	1.57143	1.56494	4	3	3	3	3	3	3	3	3	9	19	28	4	3	3	3	3	3	3	3	3	9	19	28
1155	2021-12-23	Third Year	female	14	6-8h/d	High school and blow	High school and blow	2.13636	4	4	4	4	4	4	3	3.85714	5	5	5	5	5	4	4	4.71429	3.56926	4	4	4	4	4	4	1	1	1	3	24	27	4	4	4	4	4	4	1	1	1	3	24	27
1156	2021-12-23	Third Year	male	15	6-8h/d	High school and blow	High school and blow	1.18182	4	1	1	1	1	1	1	1.42857	1	1	1	1	1	1	1	1	1.20346	2	2	2	2	2	2	3	3	3	9	12	21	2	2	2	2	2	2	3	3	3	9	12	21
1157	2021-12-23	Third Year	female	15	8-10h/d	Specialties	High school and blow	1.27273	4	2	2	5	1	3	2	2.71429	5	5	5	5	5	1	5	4.42857	2.80519	1	1	1	1	4	1	1	4	4	9	9	18	1	1	1	1	4	1	4	1	4	9	9	18
1158	2021-12-23	Third Year	female	14	6-8h/d	High school and blow	High school and blow	1.40909	4	1	1	2	2	3	3	2.28571	2	2	1	2	4	5	5	3	2.2316	3	3	3	2	3	1	3	4	4	11	15	26	3	2	3	2	2	1	4	4	4	12	13	25
1159	2021-12-23	Third Year	female	15	＜6h/d	High school and blow	High school and blow	1.27273	5	1	2	2	1	3	2	2.28571	2	2	2	2	2	1	1	1.71429	1.75758	2	2	2	3	3	3	3	3	3	9	15	24	2	2	2	3	3	3	3	3	3	9	15	24
1160	2021-12-23	Third Year	male	15	6-8h/d	High school and blow	High school and blow	1.59091	4	3	1	2	1	3	1	2.14286	2	2	2	2	2	2	2	2	1.91126	3	3	3	3	3	3	3	3	3	9	18	27	3	3	3	3	3	3	3	3	3	9	18	27
1161	2021-12-23	Third Year	female	14	6-8h/d	High school and blow	High school and blow	1.22727	4	1	2	2	2	2	2	2.14286	1	2	3	2	3	3	3	2.42857	1.9329	3	2	3	2	2	3	3	2	3	8	15	23	3	2	2	2	2	3	3	3	2	8	14	22
1162	2021-12-23	Third Year	male	15	6-8h/d	High school and blow	Specialties	1.40909	4	1	2	5	4	2	5	3.28571	4	4	4	4	4	4	4	4	2.89827	4	4	4	4	4	4	1	1	1	3	24	27	3	3	4	3	4	4	1	1	1	3	21	24
1163	2021-12-23	Third Year	female	14	6-8h/d	Specialties	Specialties	1.72727	5	1	1	1	3	4	4	2.71429	4	4	4	4	4	4	4	4	2.81385	4	4	4	4	4	4	4	4	4	12	24	36	4	4	4	4	4	4	4	4	4	12	24	36
1164	2021-12-23	Third Year	male	14	6-8h/d	Specialties	High school and blow	1.72727	4	1	1	2	3	3	3	2.42857	1	2	3	1	2	3	3	2.14286	2.09957	4	3	3	1	2	3	4	4	4	12	16	28	3	3	4	1	1	2	4	4	4	12	14	26
1165	2021-12-23	Third Year	female	14	6-8h/d	Specialties	Specialties	1.63636	4	1	2	3	3	3	3	2.71429	2	2	3	3	4	4	5	3.28571	2.54545	3	3	3	3	3	3	3	3	3	9	18	27	3	3	3	3	3	3	3	3	3	9	18	27
1166	2021-12-23	Third Year	male	15	6-8h/d	High school and blow	Undergraduate	1.5	2	5	5	5	1	5	1	3.42857	3	3	3	3	3	3	3	3	2.64286	1	1	1	1	1	1	4	4	4	12	6	18	1	1	1	1	1	1	4	4	4	12	6	18
1167	2021-12-23	Third Year	male	15	6-8h/d	High school and blow	High school and blow	1.31818	4	1	1	3	2	4	1	2.28571	2	2	1	1	3	2	2	1.85714	1.82035	2	2	2	2	2	2	3	3	3	9	12	21	2	2	2	2	2	2	3	3	3	9	12	21
1168	2021-12-23	Third Year	female	15	＜6h/d	Specialties	Specialties	1.36364	5	1	2	4	2	4	2	2.85714	2	2	3	2	5	2	2	2.57143	2.26407	3	3	3	3	3	3	3	3	3	9	18	27	1	1	1	1	1	1	4	4	4	12	6	18
1169	2021-12-23	First Year	male	12	8-10h/d	High school and blow	High school and blow	1.18182	5	4	2	1	1	1	2	2.28571	1	1	1	1	1	1	2	1.14286	1.5368	1	1	1	1	1	1	3	3	3	9	6	15	1	1	1	1	1	1	4	4	4	12	6	18
1170	2021-12-23	First Year	male	12	8-10h/d	Specialties	Specialties	1.59091	3	2	2	1	1	2	2	1.85714	1	1	1	1	3	3	3	1.85714	1.7684	3	3	3	3	3	2	2	4	3	9	17	26	3	3	3	3	3	3	2	2	2	6	18	24
1171	2021-12-23	First Year	male	14	6-8h/d	High school and blow	High school and blow	3.04545	4	5	2	3	1	3	2	2.85714	2	1	2	2	1	3	1	1.71429	2.53896	3	3	3	1	1	3	1	2	1	4	14	18	1	1	1	1	1	1	4	4	4	12	6	18
1172	2021-12-23	First Year	female	12	8-10h/d	Specialties	Specialties	1.63636	5	2	2	2	1	2	2	2.28571	4	4	3	4	4	3	3	3.57143	2.49784	3	3	3	3	3	3	3	4	3	10	18	28	3	3	3	3	3	3	2	3	3	8	18	26
1173	2021-12-23	First Year	female	13	6-8h/d	Specialties	Specialties	1.22727	4	2	1	1	2	2	2	2	1	1	1	1	1	1	1	1	1.40909	4	4	4	4	3	3	2	2	2	6	22	28	4	4	4	4	3	3	2	2	1	5	22	27
1174	2021-12-23	First Year	female	12	6-8h/d	High school and blow	High school and blow	1.54545	5	2	2	1	1	4	3	2.57143	2	2	2	1	2	1	1	1.57143	1.8961	3	3	3	3	3	2	3	3	3	9	17	26	3	3	3	3	3	2	3	3	3	9	17	26
1175	2021-12-23	First Year	female	12	8-10h/d	Specialties	Specialties	1.68182	5	2	1	1	1	1	2	1.85714	3	3	1	3	3	3	3	2.71429	2.08442	4	2	4	4	4	4	4	4	1	9	22	31	1	1	1	3	3	1	4	4	4	12	10	22
1176	2021-12-23	First Year	female	12	6-8h/d	High school and blow	High school and blow	1.72727	4	1	1	3	2	4	2	2.42857	3	3	2	4	4	4	4	3.42857	2.52814	3	3	3	3	3	3	3	3	3	9	18	27	3	3	3	3	3	3	3	3	3	9	18	27
1177	2021-12-23	First Year	female	12	6-8h/d	Specialties	Specialties	1.95455	4	3	1	3	3	4	2	2.85714	3	2	2	2	2	4	5	2.85714	2.55628	4	4	4	4	4	3	3	3	3	9	23	32	4	4	4	4	4	2	4	3	4	11	22	33
1178	2021-12-23	First Year	female	12	6-8h/d	Specialties	High school and blow	1.68182	4	3	3	1	1	3	3	2.57143	2	2	1	2	2	1	1	1.57143	1.94156	4	3	3	3	3	2	4	4	4	12	18	30	2	1	1	2	1	1	4	4	4	12	8	20
1179	2021-12-23	First Year	male	13	6-8h/d	Specialties	Specialties	1.31818	3	2	1	2	1	1	1	1.57143	4	4	1	4	4	1	1	2.71429	1.86797	3	2	3	2	2	2	3	3	3	9	14	23	3	2	3	2	2	2	3	3	3	9	14	23
1180	2021-12-23	First Year	male	13	6-8h/d	Undergraduate	Undergraduate	1.5	4	2	1	3	1	4	3	2.57143	2	2	3	2	3	4	4	2.85714	2.30952	3	3	3	3	3	3	2	3	3	8	18	26	3	3	3	3	3	3	3	3	3	9	18	27
1181	2021-12-23	First Year	female	12	8-10h/d	Specialties	Specialties	3.40909	5	5	2	5	4	5	5	4.42857	5	5	5	5	5	5	5	5	4.27922	4	4	4	4	4	4	1	2	1	4	24	28	4	4	4	4	4	4	1	2	1	4	24	28
1182	2021-12-23	First Year	female	14	＜6h/d	Specialties	Specialties	1.18182	5	2	1	1	1	1	1	1.71429	1	1	1	1	1	1	1	1	1.2987	3	3	3	3	4	2	3	3	3	9	18	27	3	2	2	3	3	2	3	3	3	9	15	24
1183	2021-12-23	First Year	female	12	6-8h/d	Specialties	Specialties	1.45455	4	1	1	2	1	2	2	1.85714	1	2	2	2	2	3	3	2.14286	1.81818	4	4	4	4	4	4	4	4	4	12	24	36	4	4	4	4	4	2	4	4	4	12	22	34
1184	2021-12-23	First Year	female	12	8-10h/d	High school and blow	High school and blow	1.09091	3	1	1	1	1	1	1	1.28571	1	1	1	1	1	1	1	1	1.12554	1	1	1	1	1	1	2	4	3	9	6	15	1	1	1	1	1	1	4	4	4	12	6	18
1185	2021-12-23	First Year	female	13	6-8h/d	High school and blow	High school and blow	1.36364	3	1	1	1	4	2	3	2.14286	1	1	2	1	2	2	1	1.42857	1.64502	3	2	3	3	3	3	4	4	4	12	17	29	3	2	3	3	3	3	4	4	4	12	17	29
1186	2021-12-23	First Year	female	13	8-10h/d	High school and blow	High school and blow	1.59091	5	1	2	1	1	5	3	2.57143	3	3	2	3	3	3	3	2.85714	2.33983	4	4	4	3	3	3	2	3	3	8	21	29	4	4	4	3	3	3	2	3	3	8	21	29
1187	2021-12-23	First Year	female	15	6-8h/d	High school and blow	High school and blow	1.22727	5	1	1	3	3	2	2	2.42857	2	2	2	2	2	4	4	2.57143	2.07576	3	3	2	2	3	3	2	3	3	8	16	24	2	3	3	3	2	3	3	3	3	9	16	25
1188	2021-12-23	First Year	male	13	6-8h/d	Undergraduate	High school and blow	1.81818	5	3	5	3	4	5	3	4	2	2	4	2	2	2	4	2.57143	2.79654	4	3	3	3	3	3	3	3	3	9	19	28	4	4	4	4	4	4	3	3	3	9	24	33
1189	2021-12-23	First Year	female	12	6-8h/d	Undergraduate	Undergraduate	2.27273	5	4	5	3	4	5	3	4.14286	2	2	4	2	2	2	4	2.57143	2.99567	4	3	3	3	3	3	3	3	3	9	19	28	4	4	4	4	4	4	3	3	3	9	24	33
1190	2021-12-23	First Year	female	13	6-8h/d	Specialties	Undergraduate	1.5	3	1	1	2	1	2	2	1.71429	1	1	2	1	3	4	1	1.85714	1.69048	3	3	3	3	2	2	2	2	2	6	16	22	4	2	2	1	1	2	2	3	2	7	12	19
1191	2021-12-23	First Year	female	13	6-8h/d	High school and blow	High school and blow	1.36364	4	1	1	1	1	4	2	2	4	4	2	4	4	4	3	3.57143	2.31169	4	3	2	2	2	2	3	2	3	8	15	23	4	4	2	2	2	3	2	2	3	7	17	24
1192	2021-12-23	First Year	male	12	8-10h/d	High school and blow	High school and blow	1.68182	5	5	5	1	2	2	3	3.28571	4	4	4	4	4	4	4	4	2.98918	3	3	2	2	2	2	2	2	2	6	14	20	3	3	3	2	2	2	2	2	2	6	15	21
1193	2021-12-23	First Year	female	12	＜6h/d	Specialties	Undergraduate	1.68182	5	1	1	2	1	3	1	2	3	3	1	2	3	1	3	2.28571	1.98918	3	3	3	1	1	3	4	4	4	12	14	26	4	3	3	2	1	1	4	4	4	12	14	26
1194	2021-12-23	First Year	female	14	6-8h/d	High school and blow	High school and blow	2.18182	5	2	1	2	3	4	3	2.85714	1	3	1	2	1	2	2	1.71429	2.25108	3	4	3	3	2	2	3	3	3	9	17	26	3	3	3	3	2	2	3	3	3	9	16	25
1195	2021-12-23	First Year	male	12	＜6h/d	High school and blow	High school and blow	2.59091	3	1	1	5	1	5	2	2.57143	1	2	2	1	3	4	4	2.42857	2.5303	4	4	1	1	2	2	4	4	4	12	14	26	4	3	3	2	3	3	4	4	4	12	18	30
1196	2021-12-23	First Year	female	13	6-8h/d	Specialties	Undergraduate	1.13636	4	2	2	1	1	4	1	2.14286	1	1	1	1	1	1	1	1	1.42641	3	2	3	2	2	2	2	2	3	7	14	21	2	2	2	2	2	2	3	3	3	9	12	21
1197	2021-12-23	First Year	male	14	6-8h/d	High school and blow	High school and blow	1.77273	3	2	2	2	1	4	2	2.28571	1	2	1	1	1	1	1	1.14286	1.73377	3	3	3	3	3	3	2	3	3	8	18	26	3	3	3	3	3	3	3	3	3	9	18	27
1198	2021-12-23	First Year	male	12	6-8h/d	High school and blow	High school and blow	2.63636	5	3	3	2	2	2	2	2.71429	2	2	2	2	2	2	4	2.28571	2.54545	3	3	3	3	3	3	2	3	3	8	18	26	3	3	3	3	3	3	2	3	3	8	18	26
1199	2021-12-23	First Year	male	13	8-10h/d	High school and blow	High school and blow	2.27273	5	5	5	5	5	5	4	4.85714	4	5	5	5	5	5	5	4.85714	3.99567	4	4	4	4	4	4	4	4	4	12	24	36	4	4	4	4	4	4	4	4	4	12	24	36
1200	2021-12-23	First Year	male	13	8-10h/d	Specialties	Specialties	1.27273	5	1	5	1	1	3	1	2.42857	2	2	1	2	2	1	1	1.57143	1.75758	3	3	3	3	1	3	4	4	4	12	16	28	3	3	3	3	1	3	4	4	4	12	16	28
1201	2021-12-23	First Year	female	13	6-8h/d	Specialties	Specialties	1.63636	3	1	4	2	1	2	2	2.14286	1	1	1	1	1	1	1	1	1.59307	3	3	3	3	3	3	2	2	2	6	18	24	3	3	3	3	3	3	2	2	2	6	18	24
1202	2021-12-23	First Year	female	12	8-10h/d	Specialties	Specialties	1.90909	4	1	2	4	4	4	2	3	2	2	2	4	3	2	1	2.28571	2.39827	1	1	1	1	1	1	4	4	4	12	6	18	1	1	1	1	1	1	4	4	4	12	6	18
1203	2021-12-23	First Year	female	13	6-8h/d	High school and blow	High school and blow	1.59091	5	1	1	1	2	2	1	1.85714	1	1	1	3	1	1	1	1.28571	1.57792	3	3	3	2	2	3	3	3	3	9	16	25	3	3	3	2	2	3	3	3	3	9	16	25
1204	2021-12-23	First Year	male	13	6-8h/d	High school and blow	Specialties	1.68182	4	2	2	1	1	3	2	2.14286	3	3	3	3	3	3	3	3	2.27489	3	2	3	3	3	3	2	3	3	8	17	25	3	3	3	3	3	2	3	3	3	9	17	26
1205	2021-12-23	First Year	male	13	6-8h/d	Specialties	Specialties	1.36364	5	5	5	1	3	2	3	3.42857	3	3	3	3	3	3	3	3	2.5974	4	4	4	4	4	4	3	3	3	9	24	33	4	4	4	4	4	4	3	3	3	9	24	33
1206	2021-12-23	First Year	female	13	8-10h/d	Undergraduate	Undergraduate	1.86364	5	2	3	1	2	4	2	2.71429	4	4	4	4	4	4	4	4	2.85931	3	3	3	3	3	3	3	3	3	9	18	27	3	3	3	3	3	3	3	3	3	9	18	27
1207	2021-12-23	First Year	male	13	8-10h/d	High school and blow	High school and blow	2.77273	5	5	3	2	1	4	4	3.42857	5	5	5	5	5	3	4	4.57143	3.59091	3	2	2	2	2	3	3	3	3	9	14	23	1	1	1	1	1	1	4	4	4	12	6	18
1208	2021-12-23	First Year	female	12	6-8h/d	High school and blow	High school and blow	1.40909	5	1	1	1	4	4	3	2.71429	1	1	3	3	3	2	1	2	2.04113	3	4	2	2	4	2	3	3	3	9	17	26	2	3	2	2	3	2	3	3	3	9	14	23
1209	2021-12-23	First Year	male	13	6-8h/d	Specialties	Specialties	1.13636	3	2	1	1	1	2	1	1.57143	1	1	1	1	3	4	5	2.28571	1.6645	4	3	3	3	1	3	1	1	1	3	17	20	4	3	2	2	2	3	1	1	1	3	16	19
1210	2021-12-23	First Year	female	12	6-8h/d	Specialties	High school and blow	1.59091	5	1	2	2	2	3	2	2.42857	2	2	2	2	2	3	4	2.42857	2.14935	3	3	3	3	3	3	3	3	3	9	18	27	1	3	2	3	3	3	3	3	3	9	15	24
1211	2021-12-23	First Year	male	12	8-10h/d	High school and blow	High school and blow	1.54545	5	1	2	1	5	5	4	3.28571	2	2	2	2	4	4	4	2.85714	2.56277	3	3	3	3	3	3	1	1	3	5	18	23	4	4	4	4	2	4	1	1	1	3	22	25
1212	2021-12-23	First Year	male	13	6-8h/d	High school and blow	High school and blow	2.54545	3	2	2	1	1	1	3	1.85714	2	3	1	4	2	2	3	2.42857	2.27706	4	4	2	3	3	4	1	2	1	4	20	24	2	2	4	1	2	4	3	2	4	9	15	24
1213	2021-12-23	First Year	female	14	6-8h/d	High school and blow	High school and blow	1.5	3	2	2	2	1	1	3	2	2	1	1	2	2	2	3	1.85714	1.78571	3	3	3	3	3	3	1	3	3	7	18	25	3	3	3	3	3	3	2	2	2	6	18	24
1214	2021-12-23	First Year	male	12	8-10h/d	Specialties	Specialties	2.09091	4	2	2	4	3	3	3	3	1	3	3	3	3	3	3	2.71429	2.60173	2	2	2	2	2	4	3	1	3	7	14	21	2	2	2	2	2	2	3	1	1	5	12	17
1215	2021-12-23	First Year	female	14	8-10h/d	High school and blow	High school and blow	3	4	1	2	2	4	3	3	2.71429	2	3	3	4	2	4	3	3	2.90476	3	3	3	4	3	3	3	3	3	9	19	28	3	4	4	4	2	3	3	3	3	9	20	29
1216	2021-12-23	First Year	male	12	6-8h/d	Specialties	Specialties	2.18182	5	1	2	1	4	5	2	2.85714	5	5	5	5	1	1	1	3.28571	2.77489	4	4	4	4	2	2	3	3	3	9	20	29	4	4	4	4	2	2	3	3	3	9	20	29
1217	2021-12-23	First Year	male	13	8-10h/d	Specialties	Specialties	1.45455	4	2	1	2	1	1	2	1.85714	4	4	4	4	4	5	5	4.28571	2.53247	3	4	4	4	1	4	1	1	1	3	20	23	3	4	4	4	1	4	3	2	1	6	20	26
1218	2021-12-23	First Year	female	12	6-8h/d	High school and blow	High school and blow	1.95455	4	1	1	1	2	3	2	2	1	1	1	1	1	2	2	1.28571	1.74675	3	3	3	3	3	3	3	3	3	9	18	27	3	3	3	3	3	3	3	3	4	10	18	28
1219	2021-12-23	First Year	male	13	8-10h/d	Undergraduate	Specialties	1.04545	3	1	1	1	1	3	1	1.57143	2	2	2	2	2	2	2	2	1.53896	2	2	2	3	2	3	2	3	3	8	14	22	3	3	3	3	3	3	2	2	2	6	18	24
1220	2021-12-23	First Year	female	13	8-10h/d	Undergraduate	Specialties	1.54545	5	1	3	1	3	5	2	2.85714	1	2	3	2	3	4	3	2.57143	2.32468	4	4	3	3	2	3	2	3	4	9	19	28	4	4	4	3	2	4	1	3	4	8	21	29
1221	2021-12-23	First Year	female	13	6-8h/d	Undergraduate	Undergraduate	1.90909	5	1	1	1	2	4	1	2.14286	1	1	3	4	5	2	5	3	2.35065	3	3	2	3	3	2	2	4	3	9	16	25	4	2	2	3	3	2	1	3	4	8	16	24
1222	2021-12-23	First Year	female	13	＞10h/d	High school and blow	High school and blow	1.36364	3	1	1	1	1	4	1	1.71429	2	2	2	2	3	3	2	2.28571	1.78788	3	3	3	2	3	3	3	3	3	9	17	26	3	2	1	2	1	1	3	3	4	10	10	20
1223	2021-12-23	First Year	female	13	6-8h/d	High school and blow	High school and blow	2.5	5	2	2	2	4	5	3	3.28571	1	2	3	4	5	2	2	2.71429	2.83333	4	3	3	3	3	3	4	3	3	10	19	29	3	3	3	3	3	3	4	4	4	12	18	30
1224	2021-12-23	First Year	female	12	8-10h/d	High school and blow	High school and blow	1.18182	4	1	1	1	2	3	3	2.14286	2	2	1	2	1	1	1	1.42857	1.58442	3	3	2	3	2	3	3	3	3	9	16	25	3	3	3	2	3	3	3	3	3	9	17	26
1225	2021-12-23	First Year	female	13	6-8h/d	High school and blow	High school and blow	1.31818	4	2	1	1	1	3	1	1.85714	1	1	1	1	2	2	2	1.42857	1.53463	2	2	2	2	2	2	2	4	3	9	12	21	3	1	2	2	2	2	4	4	3	11	12	23
1226	2021-12-23	First Year	female	13	6-8h/d	High school and blow	High school and blow	1.31818	5	1	4	1	2	1	2	2.28571	1	1	1	1	1	2	2	1.28571	1.62987	3	2	2	2	2	3	2	3	4	9	14	23	3	3	3	3	2	2	2	4	4	10	16	26
1227	2021-12-23	First Year	male	13	6-8h/d	High school and blow	High school and blow	1	5	2	3	4	5	3	3	3.57143	2	4	4	4	4	4	4	3.71429	2.7619	2	2	2	4	4	2	1	1	1	3	16	19	4	4	4	2	4	4	1	1	1	3	22	25
1228	2021-12-23	First Year	male	13	8-10h/d	High school and blow	High school and blow	1.45455	5	2	1	1	3	3	2	2.42857	2	2	2	2	2	2	2	2	1.96104	3	3	3	3	2	2	3	3	3	9	16	25	3	3	2	2	2	2	3	3	3	9	14	23
1229	2021-12-23	First Year	male	13	8-10h/d	Specialties	Specialties	1.54545	4	5	5	2	1	3	2	3.14286	2	2	2	3	2	4	4	2.71429	2.46753	4	4	3	3	1	3	3	3	3	9	18	27	4	4	3	3	1	3	3	3	3	9	18	27
1230	2021-12-23	First Year	female	12	＜6h/d	High school and blow	High school and blow	1.90909	5	1	1	1	5	4	2	2.71429	2	2	2	2	2	3	3	2.28571	2.30303	3	3	4	3	3	3	3	3	2	8	19	27	1	1	1	1	1	1	4	4	2	10	6	16
1231	2021-12-23	First Year	male	12	6-8h/d	High school and blow	Specialties	1.90909	4	4	3	1	2	3	4	3	2	2	2	2	1	1	5	2.14286	2.35065	4	3	3	4	3	2	4	3	4	11	19	30	1	2	3	4	4	1	2	2	2	6	15	21
1232	2021-12-23	First Year	male	13	8-10h/d	High school and blow	High school and blow	1.54545	5	1	1	1	3	4	2	2.42857	2	2	2	2	2	2	2	2	1.99134	4	4	4	3	3	4	3	3	3	9	22	31	4	4	4	3	3	4	3	3	3	9	22	31
1233	2021-12-23	First Year	male	13	8-10h/d	Specialties	Specialties	1.90909	5	1	3	1	2	2	2	2.28571	1	1	1	3	2	4	4	2.28571	2.16017	3	3	1	1	1	2	3	3	4	10	11	21	1	1	3	1	2	2	3	4	4	11	10	21
1234	2021-12-23	First Year	male	13	6-8h/d	High school and blow	High school and blow	1.40909	5	5	1	4	4	5	4	4	1	2	1	1	5	5	4	2.71429	2.70779	4	4	4	4	4	3	3	3	3	9	23	32	4	4	4	4	4	3	3	3	3	9	23	32
1235	2021-12-23	First Year	female	12	8-10h/d	High school and blow	High school and blow	2.31818	4	1	2	2	5	4	3	3	3	2	2	1	2	1	1	1.71429	2.34416	4	3	3	4	4	3	3	2	3	8	21	29	3	4	3	3	4	3	2	2	3	7	20	27
1236	2021-12-23	First Year	female	14	8-10h/d	Specialties	Specialties	2.09091	5	5	2	3	5	4	4	4	5	5	5	5	5	5	5	5	3.69697	4	4	4	4	4	4	4	4	4	12	24	36	4	4	4	4	4	4	4	4	4	12	24	36
1237	2021-12-23	First Year	female	13	6-8h/d	High school and blow	High school and blow	1.5	3	1	1	1	1	3	2	1.71429	3	3	3	3	3	3	3	3	2.07143	4	4	4	4	3	4	2	2	4	8	23	31	4	4	4	4	3	4	2	2	4	8	23	31
1238	2021-12-23	First Year	female	12	8-10h/d	High school and blow	High school and blow	1.63636	5	2	2	1	1	2	3	2.28571	2	2	2	2	2	1	1	1.71429	1.87879	1	4	4	2	2	4	3	3	3	9	17	26	1	4	4	2	2	4	3	3	3	9	17	26
1239	2021-12-23	First Year	male	14	8-10h/d	High school and blow	High school and blow	1.59091	4	2	1	1	1	4	3	2.28571	2	2	4	4	2	5	3	3.14286	2.33983	3	3	3	4	2	4	3	3	3	9	19	28	3	3	3	4	2	4	3	3	3	9	19	28
1240	2021-12-23	First Year	female	14	8-10h/d	High school and blow	High school and blow	2.13636	4	4	2	1	1	5	5	3.14286	1	1	1	1	1	4	4	1.85714	2.37879	4	4	4	4	4	1	3	1	1	5	21	26	4	4	4	4	4	4	4	4	1	9	24	33
1241	2021-12-23	First Year	male	15	6-8h/d	High school and blow	High school and blow	1.81818	3	3	3	3	3	3	2	2.85714	2	2	2	3	1	5	5	2.85714	2.51082	3	3	3	3	3	3	3	3	3	9	18	27	2	3	2	3	3	3	3	2	3	8	16	24
1242	2021-12-23	First Year	male	12	6-8h/d	Undergraduate	High school and blow	1.5	5	1	1	3	2	3	3	2.57143	1	1	2	2	3	5	5	2.71429	2.2619	3	2	3	3	3	2	4	4	4	12	16	28	3	3	3	3	2	3	4	4	4	12	17	29
1243	2021-12-23	First Year	female	12	6-8h/d	High school and blow	High school and blow	1.72727	5	1	3	3	3	3	3	3	2	3	2	2	2	4	4	2.71429	2.48052	3	3	3	3	4	4	2	2	2	6	20	26	3	3	4	3	3	3	1	1	1	3	19	22
1244	2021-12-23	First Year	female	13	6-8h/d	Undergraduate	Postgraduate and above	1.54545	1	1	1	1	1	1	1	1	3	3	3	3	1	1	1	2.14286	1.56277	4	4	4	4	4	4	3	3	3	9	24	33	1	1	1	1	4	1	1	1	1	3	9	12
1245	2021-12-23	First Year	female	13	6-8h/d	High school and blow	High school and blow	1.77273	4	2	2	1	2	3	2	2.28571	1	2	3	1	1	2	3	1.85714	1.97186	3	3	3	3	3	3	3	3	3	9	18	27	3	3	3	3	3	3	3	3	3	9	18	27
1246	2021-12-30	Senior Two	female	17	6-8h/d	Undergraduate	Undergraduate	1.18182	4	1	1	1	3	3	1	2	1	1	1	1	1	2	2	1.28571	1.48918	3	3	3	3	3	3	2	2	2	6	18	24	3	3	3	3	3	3	2	2	2	6	18	24
1247	2021-12-30	Senior Two	female	17	6-8h/d	High school and blow	High school and blow	1.31818	4	1	2	1	1	2	2	1.85714	2	1	2	1	1	2	2	1.57143	1.58225	3	3	3	2	2	3	4	3	4	11	16	27	3	3	2	2	2	3	4	4	4	12	15	27
1248	2021-12-30	Senior Two	female	16	6-8h/d	Specialties	Undergraduate	1.5	3	1	3	2	1	3	2	2.14286	3	1	3	1	1	2	2	1.85714	1.83333	3	3	3	1	3	3	3	3	2	8	16	24	3	3	3	3	3	3	3	3	3	9	18	27
1249	2021-12-30	Senior Two	female	16	＜6h/d	Specialties	Specialties	1.27273	3	1	2	1	1	1	1	1.42857	1	1	1	1	1	1	1	1	1.23377	2	2	2	3	3	3	3	3	3	9	15	24	2	2	2	3	3	3	3	3	3	9	15	24
1250	2021-12-30	Senior Two	female	17	8-10h/d	Specialties	Specialties	1.81818	5	2	2	3	2	4	4	3.14286	3	2	3	1	3	4	4	2.85714	2.60606	3	3	3	3	2	3	3	3	3	9	17	26	3	3	3	3	3	2	3	3	3	9	17	26
1251	2021-12-30	Senior Two	female	16	＜6h/d	High school and blow	High school and blow	1.27273	3	1	2	2	2	2	3	2.14286	1	1	2	1	1	2	2	1.42857	1.61472	3	3	3	2	3	3	3	3	3	9	17	26	3	3	3	2	3	3	3	3	3	9	17	26
1252	2021-12-30	Senior Two	male	17	＜6h/d	High school and blow	High school and blow	1.22727	4	2	1	2	1	3	3	2.28571	2	1	3	1	1	5	5	2.57143	2.02814	3	3	3	3	3	3	3	3	2	8	18	26	3	3	3	3	3	3	3	3	2	8	18	26
1253	2021-12-30	Senior Two	female	17	6-8h/d	High school and blow	Undergraduate	1.27273	3	1	1	1	1	4	2	1.85714	1	1	1	1	1	2	1	1.14286	1.42424	2	2	2	4	3	2	2	2	2	6	15	21	1	2	2	3	2	2	1	2	2	5	12	17
1254	2021-12-30	Senior Two	male	16	＜6h/d	Specialties	High school and blow	1.81818	4	1	2	1	1	4	2	2.14286	1	1	1	1	1	1	1	1	1.65368	3	2	2	3	3	3	3	3	3	9	16	25	3	2	2	3	3	3	3	3	3	9	16	25
1255	2021-12-30	Senior Two	female	18	＜6h/d	High school and blow	High school and blow	1.04545	3	3	4	1	1	1	2	2.14286	2	2	2	2	2	2	2	2	1.72944	3	2	2	2	2	2	3	3	3	9	13	22	3	2	2	2	2	2	3	3	3	9	13	22
1256	2021-12-30	Senior Two	female	16	6-8h/d	High school and blow	High school and blow	1.18182	3	1	2	1	1	1	1	1.42857	1	1	1	1	1	1	1	1	1.20346	3	2	3	2	2	3	3	3	4	10	15	25	3	2	3	2	2	3	4	4	4	12	15	27
1257	2021-12-30	Senior Two	male	17	6-8h/d	Undergraduate	Undergraduate	2.18182	5	2	2	1	5	5	3	3.28571	3	3	3	3	3	2	2	2.71429	2.72727	4	3	3	1	1	3	4	4	2	10	15	25	2	2	2	2	2	4	4	4	2	10	14	24
1258	2021-12-30	Senior Two	female	17	6-8h/d	High school and blow	High school and blow	1.18182	3	1	2	1	1	1	2	1.57143	3	2	3	1	1	1	1	1.71429	1.48918	2	2	3	1	2	2	4	2	4	10	12	22	1	2	3	1	2	2	4	2	4	10	11	21
1259	2021-12-30	Senior Two	female	17	6-8h/d	High school and blow	Undergraduate	1.22727	3	2	2	1	2	5	2	2.42857	1	1	1	1	1	1	2	1.14286	1.59957	4	3	3	3	2	3	3	3	3	9	18	27	4	2	3	3	2	4	4	4	4	12	18	30
1260	2021-12-30	Senior Two	male	17	6-8h/d	High school and blow	High school and blow	1.36364	3	1	2	3	3	1	2	2.14286	2	1	2	1	1	2	2	1.57143	1.69264	3	2	2	2	2	2	2	2	2	6	13	19	2	1	1	3	2	2	3	3	2	8	11	19
1261	2021-12-30	Senior Two	female	17	＜6h/d	Specialties	High school and blow	1.31818	4	1	3	1	1	3	1	2	1	1	1	1	1	1	1	1	1.43939	3	3	2	2	2	2	4	4	4	12	14	26	3	3	2	2	2	2	4	4	4	12	14	26
1262	2021-12-30	Senior Two	male	17	＜6h/d	Specialties	Specialties	2.68182	4	2	1	1	4	4	3	2.71429	3	3	3	3	3	3	3	3	2.7987	3	3	3	3	3	3	2	2	2	6	18	24	3	3	3	3	3	3	2	2	2	6	18	24
1263	2021-12-30	Senior Two	female	16	6-8h/d	High school and blow	Undergraduate	1.95455	4	3	3	3	2	3	2	2.85714	2	1	2	2	1	1	2	1.57143	2.12771	3	3	3	3	3	3	4	2	3	9	18	27	3	3	3	3	3	3	4	2	3	9	18	27
1264	2021-12-30	Senior Two	male	17	6-8h/d	High school and blow	High school and blow	1.22727	5	1	1	1	1	2	2	1.85714	1	1	1	1	1	2	2	1.28571	1.45671	1	1	1	1	1	1	4	4	4	12	6	18	1	1	1	1	1	1	4	4	4	12	6	18
1265	2021-12-30	Senior Two	male	16	6-8h/d	High school and blow	High school and blow	1.22727	3	1	1	1	1	2	1	1.42857	2	1	2	1	1	1	1	1.28571	1.31385	3	2	3	2	2	2	2	3	2	7	14	21	3	2	3	2	2	3	3	3	2	8	15	23
1266	2021-12-30	Senior Two	male	17	6-8h/d	High school and blow	High school and blow	1.40909	3	1	1	1	1	2	1	1.42857	1	1	1	1	2	2	2	1.42857	1.42208	3	3	3	3	3	3	2	2	2	6	18	24	3	3	3	3	3	3	2	2	2	6	18	24
1267	2021-12-30	Senior Two	female	16	6-8h/d	Undergraduate	Undergraduate	1.18182	3	1	2	1	1	1	2	1.57143	1	2	2	1	1	1	1	1.28571	1.34632	4	3	4	4	3	4	4	4	4	12	22	34	4	3	4	4	3	3	3	3	3	9	21	30
1268	2021-12-30	Senior Two	female	16	6-8h/d	Specialties	High school and blow	1.68182	4	2	2	1	3	3	2	2.42857	2	1	4	1	1	4	4	2.42857	2.17965	4	4	4	1	1	4	4	3	2	9	18	27	4	4	4	1	1	4	4	3	2	9	18	27
1269	2021-12-30	Senior Two	male	17	6-8h/d	High school and blow	High school and blow	1.31818	2	2	2	2	1	1	1	1.57143	2	1	2	1	1	1	1	1.28571	1.39177	1	1	1	1	1	1	3	4	3	10	6	16	1	1	1	1	1	1	4	4	4	12	6	18
1270	2021-12-30	Senior Two	male	17	＜6h/d	Undergraduate	Specialties	1.40909	2	1	1	3	3	3	2	2.14286	1	1	2	1	1	2	3	1.57143	1.70779	4	3	3	3	3	3	3	2	2	7	19	26	3	3	3	3	3	3	2	2	2	6	18	24
1271	2021-12-30	Senior Two	female	17	6-8h/d	High school and blow	High school and blow	1.36364	4	2	4	2	3	2	1	2.57143	1	1	1	1	1	2	2	1.28571	1.74026	4	3	3	3	4	4	3	4	4	11	21	32	4	3	2	3	3	2	4	4	4	12	17	29
1272	2021-12-30	Senior Two	male	16	6-8h/d	Specialties	Specialties	1.77273	5	2	2	2	2	2	1	2.28571	2	1	2	1	1	2	2	1.57143	1.87662	3	3	3	3	3	3	2	2	2	6	18	24	3	3	3	3	3	3	2	2	2	6	18	24
1273	2021-12-30	Senior Two	male	17	6-8h/d	Undergraduate	Undergraduate	1.59091	1	2	1	1	1	2	2	1.42857	3	3	3	3	3	3	3	3	2.00649	4	4	4	4	4	4	1	1	1	3	24	27	4	4	4	4	4	4	1	1	1	3	24	27
1274	2021-12-30	Senior Two	female	18	＜6h/d	Specialties	Specialties	1.45455	3	1	1	1	1	3	4	2	2	2	2	1	1	1	2	1.57143	1.67532	3	3	3	3	3	3	2	2	2	6	18	24	3	3	3	3	3	3	2	2	2	6	18	24
1275	2021-12-30	Senior Two	male	16	6-8h/d	Undergraduate	High school and blow	1.54545	5	5	5	2	1	4	3	3.57143	2	2	2	2	2	2	2	2	2.37229	3	3	3	3	3	3	3	3	3	9	18	27	3	3	3	3	3	3	3	3	3	9	18	27
1276	2021-12-30	Senior Two	male	18	6-8h/d	High school and blow	High school and blow	1.22727	3	1	1	1	1	2	1	1.42857	1	1	1	1	1	1	1	1	1.21861	2	2	2	2	2	2	3	3	3	9	12	21	2	2	2	2	2	2	3	3	3	9	12	21
1277	2021-12-30	Senior Two	male	16	6-8h/d	Undergraduate	Specialties	1.86364	3	2	2	3	5	5	4	3.42857	2	2	4	2	2	5	2	2.71429	2.66883	4	3	3	2	2	3	3	3	3	9	17	26	3	3	3	2	2	3	3	3	3	9	16	25
1278	2021-12-30	Senior Two	female	16	6-8h/d	Specialties	Undergraduate	1.09091	2	1	1	1	1	2	2	1.42857	1	1	1	1	1	2	2	1.28571	1.2684	3	3	3	2	2	2	4	4	2	10	15	25	2	3	3	2	2	2	3	3	2	8	14	22
1279	2021-12-30	Senior Two	male	17	＜6h/d	Specialties	Specialties	1.40909	5	2	3	1	1	2	1	2.14286	2	2	2	2	2	1	1	1.71429	1.75541	3	2	2	2	2	2	4	4	4	12	13	25	2	2	2	2	2	2	4	4	4	12	12	24
1280	2021-12-29	Second Year	female	13	8-10h/d	Undergraduate	Undergraduate	1.59091	4	1	1	1	2	2	2	1.85714	3	4	3	4	4	2	2	3.14286	2.19697	3	2	3	3	2	3	3	3	3	9	16	25	3	2	3	3	2	3	3	3	3	9	16	25
1281	2021-12-29	Second Year	female	13	6-8h/d	High school and blow	High school and blow	1.5	5	1	1	1	1	5	5	2.71429	2	5	2	5	5	2	2	3.28571	2.5	3	3	3	3	3	3	2	2	2	6	18	24	3	3	3	3	3	3	2	2	2	6	18	24
1282	2021-12-29	Second Year	female	13	6-8h/d	Specialties	Specialties	1.36364	5	1	1	1	1	3	2	2	2	3	1	3	3	2	2	2.28571	1.88312	3	3	3	3	3	3	3	3	3	9	18	27	3	3	3	3	3	3	3	3	3	9	18	27
1283	2021-12-29	Second Year	female	13	6-8h/d	Specialties	Specialties	1.86364	5	1	1	1	1	5	2	2.28571	3	3	3	3	3	4	4	3.28571	2.47835	3	3	2	3	2	1	4	4	4	12	14	26	3	2	2	2	2	1	4	4	4	12	12	24
1284	2021-12-29	Second Year	female	14	6-8h/d	Undergraduate	Specialties	1.36364	5	1	1	1	2	4	2	2.28571	1	2	1	2	2	3	1	1.71429	1.78788	4	4	4	2	4	2	3	3	3	9	20	29	4	4	4	2	4	1	4	4	4	12	19	31
1285	2021-12-29	Second Year	male	13	6-8h/d	High school and blow	High school and blow	1.72727	4	1	1	1	1	3	2	1.85714	1	2	1	2	2	2	2	1.71429	1.76623	3	3	3	3	3	3	3	3	4	10	18	28	3	3	3	3	3	3	3	3	3	9	18	27
1286	2021-12-29	Second Year	male	13	6-8h/d	High school and blow	High school and blow	1.45455	5	2	1	1	1	1	4	2.14286	2	2	2	2	2	1	1	1.71429	1.77056	1	2	2	1	1	1	2	2	2	6	8	14	1	2	2	1	1	1	2	2	2	6	8	14
1287	2021-12-29	Second Year	female	13	6-8h/d	High school and blow	High school and blow	1.81818	4	1	1	2	2	4	3	2.42857	1	4	1	4	4	3	3	2.85714	2.36797	2	3	3	2	4	4	4	4	4	12	18	30	3	3	3	4	3	3	4	4	4	12	19	31
1288	2021-12-29	Second Year	female	14	6-8h/d	Undergraduate	Undergraduate	1.40909	5	1	1	1	3	2	2	2.14286	2	2	2	2	2	2	2	2	1.85065	4	3	3	3	3	2	4	4	4	12	18	30	3	3	3	3	3	3	4	4	4	12	18	30
1289	2021-12-29	Second Year	female	13	6-8h/d	Undergraduate	Undergraduate	1.27273	3	1	1	2	1	3	2	1.85714	1	2	1	2	2	1	2	1.57143	1.5671	1	1	1	1	1	1	4	4	4	12	6	18	4	3	2	2	2	2	3	3	3	9	15	24
1290	2021-12-29	Second Year	male	13	6-8h/d	High school and blow	High school and blow	1.59091	5	1	1	1	1	4	1	2	2	1	1	2	2	1	1	1.42857	1.67316	1	1	1	1	3	1	3	4	4	11	8	19	3	3	3	2	2	3	3	3	3	9	16	25
1291	2021-12-29	Second Year	female	14	6-8h/d	Specialties	Specialties	1.45455	1	1	1	1	5	1	1	1.57143	1	1	1	1	1	1	1	1	1.34199	4	4	4	4	4	4	1	1	1	3	24	27	4	4	4	4	4	4	1	1	1	3	24	27
1292	2021-12-29	Second Year	male	14	6-8h/d	High school and blow	Specialties	1.18182	3	1	1	1	1	2	1	1.42857	1	1	1	1	1	1	1	1	1.20346	3	3	2	2	2	2	4	4	4	12	14	26	3	3	3	3	3	3	4	4	4	12	18	30
1293	2021-12-29	Second Year	female	13	6-8h/d	High school and blow	High school and blow	2	5	2	1	4	5	5	4	3.71429	4	4	4	4	4	4	4	4	3.2381	3	3	3	3	3	3	3	3	3	9	18	27	3	3	3	3	3	3	3	3	3	9	18	27
1294	2021-12-29	Second Year	female	13	＜6h/d	High school and blow	Specialties	1.54545	3	1	1	1	2	3	1	1.71429	2	2	4	4	3	2	4	3	2.08658	4	4	4	4	4	4	1	1	1	3	24	27	4	4	4	4	4	4	1	1	1	3	24	27
1295	2021-12-29	Second Year	female	13	6-8h/d	Undergraduate	Undergraduate	1.81818	4	1	1	2	1	4	3	2.28571	2	2	2	2	2	4	4	2.57143	2.22511	3	4	4	4	4	3	2	1	2	5	22	27	4	4	4	4	4	4	3	3	1	7	24	31
1296	2021-12-29	Second Year	male	14	6-8h/d	Specialties	Specialties	1.36364	5	1	1	1	1	2	1	1.71429	2	2	2	2	2	1	1	1.71429	1.5974	3	3	3	2	2	2	2	2	2	6	15	21	3	3	3	2	2	2	2	2	2	6	15	21
1297	2021-12-29	Second Year	female	13	6-8h/d	High school and blow	High school and blow	1.54545	5	1	1	1	1	2	2	1.85714	1	4	1	4	4	1	1	2.28571	1.8961	3	3	3	2	2	2	2	2	2	6	15	21	3	3	3	2	2	2	2	2	2	6	15	21
1298	2021-12-29	Second Year	female	13	6-8h/d	Undergraduate	Undergraduate	1.59091	5	1	2	2	2	3	2	2.42857	2	4	2	4	4	3	3	3.14286	2.38745	4	4	4	4	4	2	3	3	3	9	22	31	4	4	4	4	4	1	3	3	3	9	21	30
1299	2021-12-29	Second Year	female	14	6-8h/d	High school and blow	High school and blow	1.59091	4	1	1	1	1	3	2	1.85714	2	2	2	1	1	2	2	1.71429	1.72078	3	3	3	3	3	3	2	2	2	6	18	24	3	3	3	3	3	3	2	2	2	6	18	24
1300	2021-12-29	Second Year	female	13	6-8h/d	High school and blow	High school and blow	1.5	5	1	2	1	3	2	2	2.28571	1	3	1	3	3	2	2	2.14286	1.97619	4	3	3	4	4	2	3	3	3	9	20	29	4	4	4	4	4	2	3	3	3	9	22	31
1301	2021-12-29	Second Year	female	13	6-8h/d	Specialties	Specialties	1.90909	5	1	2	1	1	5	4	2.71429	3	3	3	3	4	4	4	3.42857	2.68398	3	3	3	3	3	3	2	2	2	6	18	24	3	3	3	3	3	3	2	2	2	6	18	24
1302	2021-12-29	Second Year	female	13	＜6h/d	Specialties	Specialties	1.22727	3	1	1	1	1	1	2	1.42857	1	1	1	1	1	1	1	1	1.21861	1	1	1	3	3	2	2	3	3	8	11	19	1	1	1	1	1	1	1	1	1	3	6	9
1303	2021-12-29	Second Year	female	13	6-8h/d	High school and blow	High school and blow	1.36364	3	1	1	1	1	4	2	1.85714	1	1	2	1	1	1	1	1.14286	1.45455	3	3	3	2	2	3	3	3	3	9	16	25	3	3	3	3	2	3	3	3	3	9	17	26
1304	2021-12-29	Second Year	male	13	6-8h/d	Specialties	High school and blow	1.40909	5	1	3	2	2	3	2	2.57143	1	4	1	4	4	4	4	3.14286	2.37446	4	4	4	4	1	4	3	3	3	9	21	30	4	4	4	4	1	4	3	3	3	9	21	30
1305	2021-12-29	Second Year	male	14	6-8h/d	High school and blow	High school and blow	1	5	1	2	1	5	5	3	3.14286	1	1	1	1	1	1	1	1	1.71429	1	1	1	1	3	3	2	2	4	8	10	18	1	1	1	1	1	1	4	4	4	12	6	18
1306	2021-12-29	Second Year	male	14	6-8h/d	High school and blow	Undergraduate	1.27273	3	3	3	4	4	4	3	3.42857	2	2	2	3	2	2	2	2.14286	2.28139	3	3	3	3	3	3	3	3	3	9	18	27	3	3	3	3	3	3	3	3	3	9	18	27
1307	2021-12-29	Second Year	female	14	6-8h/d	Undergraduate	Undergraduate	1.36364	5	2	2	1	1	3	3	2.42857	1	2	3	4	5	2	1	2.57143	2.12121	3	3	3	3	1	1	4	4	4	12	14	26	2	2	2	2	1	3	4	4	4	12	12	24
1308	2021-12-29	Second Year	male	14	6-8h/d	Specialties	Specialties	1.68182	4	3	2	1	1	4	1	2.28571	3	4	3	4	4	2	2	3.14286	2.37013	2	3	3	2	2	2	3	3	3	9	14	23	3	3	2	2	2	3	3	3	3	9	15	24
1309	2021-12-29	Second Year	male	13	6-8h/d	Undergraduate	Undergraduate	1.04545	4	2	2	3	3	3	1	2.57143	2	2	2	2	2	2	2	2	1.87229	3	3	3	3	3	3	3	3	3	9	18	27	3	3	3	3	3	3	3	3	3	9	18	27
1310	2021-12-29	Second Year	female	13	6-8h/d	Undergraduate	Undergraduate	1.22727	3	1	1	2	3	2	1	1.85714	2	2	2	2	2	2	2	2	1.69481	3	3	3	3	3	3	3	3	2	8	18	26	3	3	3	3	3	2	3	3	2	8	17	25
1311	2021-12-29	Second Year	male	14	6-8h/d	High school and blow	High school and blow	1.5	3	1	1	2	2	3	2	2	1	1	1	1	1	2	2	1.28571	1.59524	2	2	2	3	4	2	3	3	3	9	15	24	2	2	2	2	2	2	3	3	3	9	12	21
1312	2021-12-29	Second Year	male	13	6-8h/d	High school and blow	High school and blow	1.27273	4	1	1	3	1	3	1	2	1	2	1	2	2	2	3	1.85714	1.70996	2	2	4	2	2	2	3	3	3	9	14	23	2	2	2	2	2	2	3	3	3	9	12	21
1313	2021-12-29	Second Year	female	14	6-8h/d	High school and blow	High school and blow	1.36364	3	2	2	1	1	1	2	1.71429	1	1	1	1	1	2	2	1.28571	1.45455	2	1	4	1	1	1	4	4	4	12	10	22	4	2	3	1	1	1	4	4	4	12	12	24
1314	2021-12-29	Second Year	female	13	8-10h/d	High school and blow	High school and blow	1.59091	5	2	2	1	5	4	2	3	3	3	3	3	3	4	4	3.28571	2.62554	3	3	3	3	3	3	4	4	4	12	18	30	3	3	3	3	3	3	4	4	4	12	18	30
1315	2021-12-29	Second Year	female	13	6-8h/d	High school and blow	High school and blow	1.40909	5	1	1	2	1	2	4	2.28571	2	1	1	1	1	1	2	1.28571	1.66017	3	3	2	2	2	2	3	3	3	9	14	23	3	3	2	2	2	2	3	3	3	9	14	23
1316	2021-12-29	Second Year	male	14	6-8h/d	Specialties	Specialties	1.63636	5	1	1	1	1	4	3	2.28571	2	2	2	2	1	2	2	1.85714	1.92641	3	3	3	3	3	3	3	3	3	9	18	27	3	3	3	3	3	3	3	3	3	9	18	27
1317	2021-12-29	Second Year	female	13	6-8h/d	Undergraduate	Undergraduate	1.27273	5	1	1	1	1	3	2	2	2	3	2	3	3	1	1	2.14286	1.80519	1	1	1	1	3	4	4	4	4	12	11	23	1	1	1	1	1	1	4	4	4	12	6	18
1318	2021-12-29	Second Year	female	13	6-8h/d	High school and blow	High school and blow	1.45455	4	1	4	1	1	4	3	2.57143	1	1	1	1	2	3	3	1.71429	1.91342	4	4	4	4	4	4	3	3	4	10	24	34	4	4	4	4	4	4	4	4	4	12	24	36
1319	2021-12-29	Second Year	female	13	6-8h/d	Undergraduate	Specialties	1.59091	5	1	1	1	1	1	3	1.85714	1	1	1	1	1	3	3	1.57143	1.67316	4	4	4	4	4	4	3	3	3	9	24	33	3	2	2	4	2	2	4	4	4	12	15	27
1320	2021-12-29	Second Year	male	13	6-8h/d	High school and blow	High school and blow	2.31818	5	4	2	2	1	4	3	3	1	1	4	3	3	1	3	2.28571	2.53463	2	2	2	2	2	2	3	3	3	9	12	21	3	2	2	3	3	2	3	3	3	9	15	24
1321	2021-12-29	Second Year	female	13	6-8h/d	High school and blow	Specialties	1.31818	4	1	3	2	1	4	3	2.57143	2	2	2	2	2	2	3	2.14286	2.01082	1	1	1	1	1	1	4	4	4	12	6	18	1	1	1	1	1	1	4	4	4	12	6	18
1322	2021-12-29	Second Year	female	13	6-8h/d	High school and blow	High school and blow	1.40909	4	3	3	2	2	2	2	2.57143	2	3	2	3	3	2	2	2.42857	2.13636	3	3	3	1	1	1	4	4	4	12	12	24	3	3	3	1	1	1	4	4	4	12	12	24
1323	2021-12-29	Second Year	male	13	6-8h/d	High school and blow	High school and blow	1.22727	5	1	1	3	3	3	2	2.57143	1	1	3	4	4	4	4	3	2.26623	2	2	2	2	2	2	3	3	3	9	12	21	2	3	3	2	2	3	3	3	3	9	15	24
1324	2021-12-29	Second Year	male	13	8-10h/d	Undergraduate	Undergraduate	1.13636	1	1	1	1	1	1	1	1	1	1	1	1	1	2	2	1.28571	1.14069	3	3	2	4	1	4	4	4	4	12	17	29	3	3	1	4	1	4	4	4	4	12	16	28
1325	2021-12-29	Second Year	female	14	6-8h/d	High school and blow	High school and blow	1.86364	4	1	3	1	3	4	3	2.71429	2	4	2	4	3	5	1	3	2.52597	3	3	3	2	1	1	2	2	3	7	13	20	3	3	3	1	1	1	3	2	3	8	12	20
1326	2021-12-29	Second Year	female	14	8-10h/d	High school and blow	High school and blow	1.63636	5	2	5	1	3	2	3	3	2	2	2	2	2	4	4	2.57143	2.4026	4	4	4	4	4	2	3	3	3	9	22	31	4	4	2	3	2	2	3	3	3	9	17	26
1327	2021-12-29	Second Year	female	13	6-8h/d	Specialties	Specialties	1.5	4	1	1	1	1	3	2	1.85714	1	3	1	3	3	4	1	2.28571	1.88095	3	2	4	2	3	2	4	4	4	12	16	28	3	2	3	2	2	2	4	4	4	12	14	26
1328	2021-12-29	Second Year	female	13	8-10h/d	Undergraduate	Undergraduate	1.68182	4	1	1	1	1	5	3	2.28571	1	1	1	1	1	1	1	1	1.65584	4	3	3	2	2	3	3	3	4	10	17	27	3	2	3	2	2	2	3	3	3	9	14	23
1329	2021-12-29	Second Year	female	13	＜6h/d	Undergraduate	Undergraduate	1.63636	5	1	1	1	3	4	3	2.57143	4	1	4	1	4	1	1	2.28571	2.1645	3	4	3	2	3	2	2	3	2	7	17	24	2	2	2	2	2	2	2	3	2	7	12	19
1330	2021-12-29	Second Year	male	14	8-10h/d	Undergraduate	Specialties	2	3	2	2	1	1	1	3	1.85714	5	5	5	5	5	5	5	5	2.95238	2	3	3	2	2	3	3	3	3	9	15	24	3	3	3	4	4	4	3	3	3	9	21	30
1331	2021-12-29	Second Year	female	13	＜6h/d	Undergraduate	Specialties	1.54545	4	2	2	1	2	3	3	2.42857	2	3	2	5	3	4	5	3.42857	2.46753	2	2	2	3	4	2	4	3	3	10	15	25	2	2	2	4	2	2	4	4	3	11	14	25
1332	2021-12-29	Second Year	female	13	6-8h/d	High school and blow	High school and blow	1.45455	4	1	2	1	3	4	3	2.57143	3	1	3	1	3	2	2	2.14286	2.05628	4	2	2	2	3	1	1	1	1	3	14	17	3	3	1	1	1	1	1	1	1	3	10	13
1333	2021-12-29	Second Year	male	13	6-8h/d	High school and blow	High school and blow	1.81818	4	1	1	1	1	3	1	1.71429	5	1	5	4	3	1	1	2.85714	2.12987	3	3	3	3	3	1	4	4	4	12	16	28	3	3	3	3	3	1	4	4	4	12	16	28
1334	2021-12-29	Second Year	female	13	6-8h/d	High school and blow	High school and blow	1.5	4	1	1	1	1	1	1	1.42857	1	2	1	1	2	1	1	1.28571	1.40476	3	3	2	1	1	1	1	1	1	3	11	14	3	3	2	3	3	4	2	1	1	4	18	22
1335	2021-12-29	Second Year	male	14	6-8h/d	High school and blow	High school and blow	1.22727	5	5	2	1	1	1	1	2.28571	1	1	1	1	1	2	2	1.28571	1.59957	2	1	1	1	1	1	4	4	4	12	7	19	1	1	1	1	1	1	4	4	4	12	6	18
1336	2021-12-29	Second Year	female	13	＜6h/d	High school and blow	High school and blow	1.45455	2	1	1	1	1	4	1	1.57143	1	1	1	1	1	1	1	1	1.34199	2	2	2	4	4	1	3	3	3	9	15	24	1	1	1	1	1	1	4	4	4	12	6	18
1337	2021-12-29	Second Year	male	14	＜6h/d	High school and blow	High school and blow	1.77273	5	2	4	3	1	3	3	3	4	4	5	4	5	2	1	3.57143	2.78139	2	1	1	1	1	1	4	4	4	12	7	19	1	1	1	1	1	1	4	4	4	12	6	18
1338	2021-12-29	Second Year	female	14	6-8h/d	Undergraduate	High school and blow	1.18182	1	1	1	1	1	1	2	1.14286	1	1	1	1	1	1	1	1	1.10823	3	3	3	3	3	3	2	2	2	6	18	24	3	3	3	3	3	3	2	2	2	6	18	24
1339	2021-12-29	Second Year	female	13	8-10h/d	High school and blow	High school and blow	1.77273	5	1	2	1	3	5	5	3.14286	3	2	4	1	2	5	5	3.14286	2.68615	3	2	3	4	2	3	2	4	3	9	17	26	3	4	3	3	1	2	4	4	4	12	16	28
1340	2021-12-29	Second Year	female	13	6-8h/d	Specialties	Specialties	1.5	4	2	3	1	1	3	1	2.14286	1	1	1	1	2	2	1	1.28571	1.64286	3	2	2	2	3	3	2	2	3	7	15	22	3	3	3	2	2	3	2	2	3	7	16	23
1341	2021-12-29	Second Year	male	14	6-8h/d	High school and blow	High school and blow	1.77273	5	4	4	3	2	3	2	3.28571	3	2	4	2	3	5	2	3	2.68615	2	4	3	3	3	2	4	3	3	10	17	27	1	1	2	2	4	3	3	2	3	8	13	21
1342	2021-12-29	Second Year	female	13	8-10h/d	High school and blow	High school and blow	2.13636	5	1	2	1	1	3	2	2.14286	3	1	3	1	3	2	2	2.14286	2.14069	1	1	1	1	1	1	4	4	4	12	6	18	1	1	1	1	1	1	4	4	4	12	6	18
1343	2021-12-29	Second Year	female	13	8-10h/d	High school and blow	High school and blow	1.54545	5	1	2	1	3	2	2	2.28571	2	2	2	2	2	2	1	1.85714	1.8961	3	2	2	2	2	2	4	4	4	12	13	25	3	2	2	3	2	2	4	4	4	12	14	26
1344	2021-12-29	Second Year	male	13	6-8h/d	High school and blow	High school and blow	1.18182	3	1	1	1	1	3	2	1.71429	1	1	2	2	1	2	2	1.57143	1.48918	3	3	3	3	2	3	3	3	2	8	17	25	3	3	3	3	2	3	3	3	2	8	17	25
1345	2021-12-29	Second Year	male	13	＜6h/d	High school and blow	High school and blow	1.68182	4	1	5	2	1	4	3	2.85714	4	4	4	1	4	2	3	3.14286	2.56061	1	2	1	1	1	4	2	4	4	10	10	20	1	1	1	1	1	1	1	4	1	6	6	12
1346	2021-12-29	Second Year	male	14	＜6h/d	High school and blow	High school and blow	1.18182	3	1	2	1	1	5	4	2.42857	2	1	1	1	2	2	2	1.57143	1.72727	3	3	3	2	2	3	3	3	3	9	16	25	3	3	3	2	2	3	3	3	3	9	16	25
1347	2021-12-29	Second Year	female	14	6-8h/d	Undergraduate	Undergraduate	2.13636	3	1	4	1	3	4	4	2.85714	4	2	5	1	4	3	3	3.14286	2.71212	3	3	4	3	3	2	4	4	3	11	18	29	3	3	4	4	3	4	4	4	2	10	21	31
1348	2021-12-29	Second Year	female	14	6-8h/d	High school and blow	High school and blow	1.40909	5	1	1	1	3	2	1	2	4	1	4	1	4	1	1	2.28571	1.89827	3	2	3	2	2	2	2	3	3	8	14	22	1	1	1	1	1	1	2	2	4	8	6	14
1349	2021-12-29	Second Year	male	13	8-10h/d	High school and blow	High school and blow	1.5	4	2	3	3	3	4	3	3.14286	4	1	4	1	4	4	4	3.14286	2.59524	3	3	3	3	3	2	3	2	2	7	17	24	4	4	4	4	1	4	1	1	1	3	21	24
1350	2021-12-29	Second Year	male	14	8-10h/d	Specialties	Specialties	1.81818	3	3	3	3	3	3	3	3	2	2	2	2	2	2	2	2	2.27273	3	3	3	3	3	3	1	1	1	3	18	21	3	3	3	3	3	3	2	2	2	6	18	24
1351	2021-12-29	Second Year	female	14	6-8h/d	Undergraduate	Undergraduate	1.09091	5	1	1	1	1	2	2	1.85714	4	4	4	4	4	2	2	3.42857	2.12554	4	4	4	4	4	4	4	4	4	12	24	36	2	2	3	4	3	3	4	4	4	12	17	29
1352	2021-12-29	Second Year	male	13	6-8h/d	High school and blow	High school and blow	2.18182	5	2	4	5	4	4	3	3.85714	3	3	3	3	3	5	5	3.57143	3.20346	3	3	3	3	3	2	4	4	4	12	17	29	3	3	3	3	3	3	4	4	4	12	18	30
1353	2021-12-29	Second Year	female	13	6-8h/d	High school and blow	High school and blow	2	5	1	1	2	2	5	5	3	5	5	5	5	5	3	3	4.42857	3.14286	3	4	4	4	4	4	3	3	3	9	23	32	4	4	4	4	4	4	3	3	3	9	24	33
1354	2021-12-29	Second Year	male	13	8-10h/d	High school and blow	High school and blow	1.31818	3	3	3	3	1	3	2	2.57143	2	2	2	2	2	1	1	1.71429	1.86797	3	3	3	3	3	3	4	4	4	12	18	30	3	3	3	3	3	3	4	4	4	12	18	30
1355	2021-12-29	Second Year	female	13	6-8h/d	High school and blow	High school and blow	1.77273	3	2	1	3	4	4	2	2.71429	2	1	1	3	4	2	2	2.14286	2.20996	3	2	2	2	1	1	2	1	1	4	11	15	3	4	4	4	4	4	1	1	1	3	23	26
1356	2021-12-29	Second Year	male	14	6-8h/d	High school and blow	High school and blow	1.59091	5	1	1	3	1	4	5	2.85714	4	3	4	3	2	2	2	2.85714	2.43506	3	3	4	1	1	3	2	4	4	10	15	25	4	4	4	1	1	3	4	4	4	12	17	29
1357	2021-12-29	Second Year	female	13	6-8h/d	High school and blow	High school and blow	1.54545	4	1	3	1	2	4	2	2.42857	2	2	2	2	2	2	2	2	1.99134	3	3	3	3	3	3	4	4	4	12	18	30	3	3	3	3	3	3	4	4	4	12	18	30
1358	2021-12-29	Second Year	male	14	6-8h/d	Undergraduate	High school and blow	1.72727	5	2	4	5	1	5	5	3.85714	5	5	5	5	5	2	2	4.14286	3.24242	4	4	4	2	4	4	3	3	3	9	22	31	4	4	4	4	2	3	3	3	3	9	21	30
1359	2021-12-29	Second Year	female	14	6-8h/d	Undergraduate	High school and blow	2.31818	5	1	4	1	4	3	3	3	4	2	4	2	4	2	2	2.85714	2.72511	3	3	3	2	4	2	3	2	3	8	17	25	1	3	3	3	1	1	2	2	2	6	12	18
1360	2021-12-29	Second Year	male	13	8-10h/d	Undergraduate	Undergraduate	1.54545	5	1	1	1	2	3	3	2.28571	1	2	1	2	4	4	1	2.14286	1.99134	3	3	3	3	2	3	3	3	2	8	17	25	3	2	3	3	2	2	2	3	3	8	15	23
1361	2021-12-29	Second Year	male	14	6-8h/d	High school and blow	High school and blow	2.13636	5	1	1	3	4	4	4	3.14286	3	2	3	2	4	5	5	3.42857	2.9026	3	3	3	4	3	3	4	4	4	12	19	31	3	3	4	4	4	3	4	4	4	12	21	33
1362	2021-12-29	Second Year	female	13	＜6h/d	Specialties	Specialties	1.86364	4	1	2	3	2	5	2	2.71429	4	1	4	1	4	2	2	2.57143	2.38312	3	3	3	4	3	2	4	4	3	11	18	29	1	1	1	1	1	1	2	2	3	7	6	13
1363	2021-12-29	Second Year	female	13	6-8h/d	High school and blow	High school and blow	1.72727	4	3	2	2	2	4	3	2.85714	2	2	2	2	2	2	2	2	2.19481	3	3	3	3	3	3	3	3	3	9	18	27	3	3	3	3	3	3	3	3	3	9	18	27
1364	2021-12-29	Second Year	female	13	6-8h/d	Specialties	Specialties	1.31818	3	1	1	1	1	2	2	1.57143	1	1	1	1	1	1	1	1	1.29654	3	3	3	2	3	3	3	3	3	9	17	26	2	3	3	2	3	3	3	3	3	9	16	25
1365	2021-12-29	Second Year	male	13	8-10h/d	High school and blow	High school and blow	1.13636	4	2	2	1	2	2	2	2.14286	1	1	1	1	1	1	1	1	1.42641	3	3	3	3	3	3	2	2	2	6	18	24	3	3	3	3	3	3	2	2	2	6	18	24
1366	2021-12-29	Second Year	female	14	＜6h/d	Specialties	Specialties	1.45455	3	3	3	2	3	3	3	2.85714	2	1	2	1	2	1	2	1.57143	1.96104	4	3	2	1	1	1	4	4	4	12	12	24	4	3	2	1	1	1	4	4	4	12	12	24
1367	2021-12-29	Second Year	female	13	6-8h/d	Undergraduate	High school and blow	1.31818	3	4	2	1	1	2	2	2.14286	3	2	3	3	3	2	2	2.57143	2.01082	3	3	3	3	3	3	2	2	2	6	18	24	3	3	3	3	3	3	2	2	2	6	18	24
1368	2021-12-29	Second Year	male	13	6-8h/d	High school and blow	Specialties	1.31818	3	1	2	2	2	3	3	2.28571	3	3	3	3	3	3	3	3	2.2013	3	3	3	3	3	3	3	3	3	9	18	27	3	3	3	3	3	3	3	3	3	9	18	27
1369	2021-12-29	Second Year	male	14	6-8h/d	High school and blow	High school and blow	1.54545	5	1	3	3	3	3	3	3	1	1	1	1	4	4	3	2.14286	2.22944	3	3	3	2	2	3	3	3	3	9	16	25	3	3	3	3	3	3	3	3	3	9	18	27
1370	2021-12-29	Second Year	male	14	6-8h/d	Undergraduate	Specialties	1.22727	5	1	3	3	1	1	3	2.42857	4	2	4	2	4	2	1	2.71429	2.12338	1	1	1	1	1	1	4	4	4	12	6	18	1	1	1	1	1	1	4	4	4	12	6	18
1371	2021-12-29	Second Year	male	14	8-10h/d	High school and blow	High school and blow	1.54545	5	1	1	1	1	3	2	2	3	2	4	1	3	1	1	2.14286	1.8961	2	2	3	1	1	2	2	2	1	5	11	16	2	2	2	2	2	2	2	2	2	6	12	18
1372	2021-12-29	Second Year	female	13	6-8h/d	Specialties	Undergraduate	1.22727	3	2	3	1	1	3	3	2.28571	3	1	3	1	3	1	1	1.85714	1.79004	2	1	2	3	2	3	3	3	3	9	13	22	3	4	4	3	3	2	2	4	4	10	19	29
1373	2021-12-29	Second Year	male	14	6-8h/d	Specialties	Specialties	1.68182	4	2	2	2	2	4	4	2.85714	3	3	3	3	3	4	4	3.28571	2.60823	3	3	4	4	3	4	2	2	2	6	21	27	3	3	3	3	3	3	2	2	2	6	18	24
1374	2021-12-29	Second Year	male	13	6-8h/d	High school and blow	Undergraduate	1.90909	5	2	2	3	5	4	3	3.42857	5	5	3	2	5	5	2	3.85714	3.06494	3	3	3	3	3	2	4	4	4	12	17	29	3	4	4	3	3	2	4	4	4	12	19	31
1375	2021-12-29	Second Year	female	14	6-8h/d	Undergraduate	Undergraduate	1.18182	2	1	2	1	1	3	1	1.57143	1	1	1	1	2	3	2	1.57143	1.44156	3	2	4	4	4	3	3	4	4	11	20	31	2	2	2	4	4	4	1	1	1	3	18	21
1376	2021-12-29	Second Year	male	14	8-10h/d	Specialties	Specialties	1.63636	5	3	4	3	3	4	3	3.57143	4	4	4	3	4	5	5	4.14286	3.11688	4	4	4	3	3	4	4	4	4	12	22	34	4	4	4	3	3	4	4	4	4	12	22	34
1377	2021-12-29	Second Year	male	14	6-8h/d	Postgraduate and above	Postgraduate and above	3.90909	5	5	5	5	5	5	4	4.85714	5	5	5	5	5	5	5	5	4.58874	3	3	3	4	4	4	1	1	1	3	21	24	4	4	4	4	4	4	1	1	1	3	24	27
1378	2021-12-29	Second Year	female	13	＜6h/d	High school and blow	Undergraduate	1.63636	3	2	2	1	1	1	3	1.85714	2	2	2	2	2	2	2	2	1.83117	1	1	1	2	2	2	3	3	3	9	9	18	3	3	3	3	3	3	2	2	2	6	18	24
1379	2021-12-29	Second Year	male	14	6-8h/d	Specialties	Specialties	1.40909	3	2	2	1	1	1	2	1.71429	1	1	1	1	1	2	1	1.14286	1.42208	3	3	2	2	2	4	4	4	4	12	16	28	4	2	1	1	2	3	4	3	3	10	13	23
1380	2021-12-29	Second Year	female	14	6-8h/d	Specialties	Postgraduate and above	1.81818	4	2	5	5	5	5	4	4.28571	5	2	5	5	2	4	4	3.85714	3.32035	4	4	4	3	3	2	2	2	2	6	20	26	4	4	4	4	4	4	3	3	3	9	24	33
1381	2021-12-29	Second Year	female	14	＜6h/d	Postgraduate and above	Undergraduate	1.36364	5	5	5	5	5	5	2	4.57143	2	2	2	2	4	4	4	2.85714	2.93074	4	4	4	3	3	2	2	2	2	6	20	26	4	4	4	4	4	4	3	3	3	9	24	33
1382	2021-12-29	Second Year	male	13	8-10h/d	Specialties	Specialties	1.04545	3	2	2	1	1	1	2	1.71429	5	5	5	5	4	4	4	4.57143	2.44372	3	4	3	3	4	1	3	3	3	9	18	27	3	4	4	3	4	1	3	3	3	9	19	28
1383	2021-12-29	Second Year	male	13	6-8h/d	High school and blow	High school and blow	1.81818	3	3	3	1	1	1	3	2.14286	4	4	4	4	3	3	4	3.71429	2.55844	3	3	2	2	2	3	3	3	3	9	15	24	3	4	4	3	2	3	3	3	3	9	19	28
1384	2021-12-29	Second Year	male	14	＜6h/d	Specialties	Specialties	1.18182	5	3	3	1	1	1	2	2.28571	2	1	2	2	1	2	2	1.71429	1.72727	4	3	3	2	2	4	1	1	1	3	18	21	4	4	4	2	2	3	3	3	2	8	19	27
1385	2021-12-29	Second Year	male	13	6-8h/d	Undergraduate	High school and blow	2.04545	4	1	2	2	3	3	3	2.57143	4	4	4	4	4	4	4	4	2.87229	2	2	2	2	3	2	3	3	2	8	13	21	4	4	2	1	3	2	2	2	4	8	16	24
1386	2021-12-29	Second Year	male	14	8-10h/d	Undergraduate	Undergraduate	1.31818	4	2	2	3	3	3	2	2.71429	2	2	2	2	2	1	1	1.71429	1.91558	3	3	3	3	3	3	2	2	2	6	18	24	4	4	4	4	4	4	1	1	1	3	24	27
1387	2022-12-29	Second Year	male	14	8-10h/d	Undergraduate	Undergraduate	1.04545	3	1	1	4	4	2	2	2.42857	3	3	3	3	3	3	4	3.14286	2.20563	3	3	3	3	3	3	2	2	2	6	18	24	4	4	4	4	4	4	2	2	2	6	24	30
1388	2021-12-29	Second Year	female	13	6-8h/d	Specialties	Specialties	2	3	3	3	1	1	1	3	2.14286	1	1	1	1	2	2	1	1.28571	1.80952	3	3	3	3	3	3	1	1	1	3	18	21	3	3	3	3	3	3	2	2	2	6	18	24
1389	2021-12-29	Second Year	female	13	8-10h/d	Specialties	Specialties	1.63636	3	2	3	1	3	3	1	2.28571	2	2	2	2	2	3	3	2.28571	2.06926	3	3	3	3	3	3	2	2	2	6	18	24	3	3	3	3	3	3	2	2	2	6	18	24
1390	2021-12-29	Second Year	female	13	6-8h/d	High school and blow	High school and blow	1.77273	4	2	3	4	4	5	5	3.85714	5	5	5	5	5	5	5	5	3.54329	4	3	4	2	4	4	1	1	3	5	21	26	4	4	4	2	4	3	2	2	3	7	21	28
1391	2021-12-29	Second Year	female	14	8-10h/d	Specialties	Specialties	1.18182	5	1	3	1	1	2	4	2.42857	1	1	1	2	1	2	2	1.42857	1.67965	3	3	2	4	4	2	3	2	2	7	18	25	4	4	4	3	3	2	2	4	2	8	20	28
1392	2021-12-29	Second Year	female	14	＜6h/d	Specialties	Specialties	1.36364	4	1	1	1	1	2	2	1.71429	2	1	2	2	1	3	1	1.71429	1.5974	3	3	3	2	4	3	4	4	4	12	18	30	4	4	4	2	1	2	4	4	4	12	17	29
1393	2021-12-29	Second Year	female	13	6-8h/d	High school and blow	High school and blow	1.72727	3	3	3	1	1	1	3	2.14286	1	1	1	1	2	2	1	1.28571	1.71861	1	3	3	4	4	3	2	1	2	5	18	23	3	3	3	3	3	3	2	1	2	5	18	23
1394	2021-12-29	Second Year	male	13	8-10h/d	High school and blow	High school and blow	1.36364	3	2	2	1	1	1	3	1.85714	2	2	2	2	1	1	2	1.71429	1.64502	3	4	2	4	2	2	2	3	4	9	17	26	3	3	3	3	3	3	2	2	4	8	18	26
1395	2021-12-29	Second Year	male	13	8-10h/d	High school and blow	High school and blow	1.5	4	1	3	1	1	1	2	1.85714	2	2	2	2	2	1	1	1.71429	1.69048	1	1	1	1	1	1	4	4	4	12	6	18	1	1	1	1	1	1	4	4	4	12	6	18
1396	2021-12-29	Second Year	male	14	6-8h/d	Undergraduate	Specialties	1.45455	3	3	3	1	1	1	3	2.14286	2	2	2	2	2	2	2	2	1.8658	3	3	3	3	3	3	2	2	2	6	18	24	4	4	4	4	4	4	2	2	2	6	24	30
1397	2021-12-29	Second Year	female	14	6-8h/d	High school and blow	High school and blow	1.27273	2	2	2	1	1	2	1	1.57143	1	2	2	3	2	2	2	2	1.61472	3	3	3	3	3	3	3	3	1	7	18	25	3	3	3	3	3	3	2	3	3	8	18	26
1398	2021-12-29	Second Year	male	13	6-8h/d	High school and blow	High school and blow	1.31818	5	3	3	5	5	5	5	4.42857	5	5	5	5	5	4	4	4.71429	3.48701	3	3	3	3	3	2	4	4	4	12	17	29	3	3	3	3	3	2	4	4	4	12	17	29
1399	2021-12-29	Second Year	female	14	6-8h/d	Specialties	Specialties	1.54545	5	2	2	1	3	3	2	2.57143	1	1	1	1	1	3	2	1.42857	1.84848	3	3	2	3	3	2	3	3	3	9	16	25	3	3	2	3	3	2	3	3	3	9	16	25
1400	2021-12-29	Second Year	male	14	＜6h/d	High school and blow	High school and blow	1.77273	5	4	4	3	2	3	3	3.42857	3	3	4	3	3	5	5	3.71429	2.97186	4	4	4	3	4	1	4	1	1	6	20	26	4	4	4	4	4	4	1	3	3	7	24	31
1401	2021-12-29	Second Year	female	13	6-8h/d	High school and blow	High school and blow	3.40909	3	3	3	1	1	1	3	2.14286	2	3	3	2	2	2	3	2.42857	2.66017	3	3	3	3	2	3	3	2	2	7	17	24	2	3	3	3	2	3	3	1	3	7	16	23
1402	2021-12-29	Second Year	female	14	6-8h/d	High school and blow	High school and blow	1.27273	4	2	3	1	1	3	1	2.14286	3	1	1	3	3	1	1	1.85714	1.75758	2	2	2	2	2	2	3	3	3	9	12	21	3	3	3	3	3	3	2	2	2	6	18	24
1403	2021-12-29	Second Year	male	13	6-8h/d	High school and blow	High school and blow	1.68182	5	2	1	1	1	4	4	2.57143	2	2	2	2	2	3	3	2.28571	2.17965	3	3	3	2	3	2	3	3	3	9	16	25	3	4	2	2	1	3	4	4	4	12	15	27
1404	2021-12-29	Second Year	male	14	6-8h/d	High school and blow	High school and blow	1	3	1	1	1	1	1	2	1.42857	1	1	5	5	5	1	1	2.71429	1.71429	2	2	2	2	2	2	2	2	2	6	12	18	2	2	2	2	2	2	2	2	2	6	12	18
1405	2021-12-29	Second Year	female	13	6-8h/d	Undergraduate	Undergraduate	1.59091	5	1	1	1	2	3	2	2.14286	2	2	2	2	2	1	1	1.71429	1.81602	2	3	3	1	1	1	3	3	3	9	11	20	4	4	4	4	4	4	3	3	3	9	24	33
1406	2021-12-29	Second Year	male	13	6-8h/d	High school and blow	High school and blow	1.22727	3	1	3	1	2	3	2	2.14286	1	2	1	2	1	1	1	1.28571	1.55195	3	2	3	3	2	2	3	3	3	9	15	24	2	2	2	2	2	2	3	3	3	9	12	21
1407	2021-12-29	Third Year	male	14	6-8h/d	Specialties	High school and blow	2	5	1	1	1	5	5	4	3.14286	3	3	3	4	4	1	1	2.71429	2.61905	3	3	3	4	4	4	4	4	4	12	21	33	3	3	3	4	4	4	4	4	4	12	21	33
1408	2021-12-29	Second Year	male	14	6-8h/d	Undergraduate	Undergraduate	1.5	2	2	2	1	1	1	3	1.71429	2	2	1	1	1	1	1	1.28571	1.5	3	3	3	3	3	3	2	2	2	6	18	24	3	3	3	3	3	3	2	2	2	6	18	24
1409	2021-12-29	Second Year	female	13	6-8h/d	Undergraduate	High school and blow	1.09091	3	2	2	1	2	3	2	2.14286	1	1	1	1	1	1	3	1.28571	1.50649	4	3	3	3	4	4	4	4	4	12	21	33	2	3	3	4	3	3	4	4	4	12	18	30
1410	2021-12-29	Second Year	male	13	8-10h/d	Undergraduate	Undergraduate	1.95455	5	2	3	5	3	5	5	4	5	5	5	5	5	5	5	5	3.65152	3	3	3	3	3	3	2	2	2	6	18	24	3	3	3	3	4	4	3	3	2	8	20	28
1411	2021-12-29	Second Year	male	14	6-8h/d	High school and blow	High school and blow	2.36364	3	3	3	1	1	1	3	2.14286	2	2	2	2	2	4	4	2.57143	2.35931	3	3	3	3	3	3	2	2	2	6	18	24	3	3	3	3	3	3	2	2	2	6	18	24
1412	2021-12-29	Second Year	male	14	6-8h/d	High school and blow	High school and blow	2.68182	3	2	2	1	1	1	2	1.71429	4	4	4	4	4	4	4	4	2.7987	1	1	1	1	1	1	4	4	4	12	6	18	1	1	1	1	1	1	4	4	4	12	6	18
1413	2021-12-29	Second Year	female	13	6-8h/d	Postgraduate and above	Postgraduate and above	2.09091	4	4	3	2	3	2	4	3.14286	2	2	4	2	2	4	4	2.85714	2.69697	3	4	4	3	2	3	3	3	3	9	19	28	4	4	4	3	2	3	3	3	3	9	20	29
1414	2021-12-29	Second Year	female	13	6-8h/d	High school and blow	High school and blow	1.13636	3	2	4	1	1	3	3	2.42857	1	1	1	1	1	2	2	1.28571	1.61688	2	2	2	2	1	2	2	4	4	10	11	21	2	2	2	3	2	3	2	3	3	8	14	22
1415	2021-12-29	Second Year	male	13	6-8h/d	High school and blow	High school and blow	1.40909	4	1	1	1	3	4	2	2.28571	1	1	1	1	1	4	4	1.85714	1.85065	4	4	3	2	2	3	2	2	3	7	18	25	3	3	3	3	3	3	2	2	2	6	18	24
1416	2021-12-29	Second Year	male	13	6-8h/d	Specialties	Specialties	1.54545	5	1	1	4	3	4	2	2.85714	3	2	3	3	2	1	1	2.14286	2.18182	3	3	3	3	3	3	3	3	2	8	18	26	3	3	3	3	3	3	3	3	3	9	18	27
1417	2021-12-29	Second Year	male	14	6-8h/d	High school and blow	High school and blow	1.5	5	1	1	1	1	5	3	2.42857	3	3	3	3	3	3	3	3	2.30952	3	3	3	3	2	1	4	2	2	8	15	23	4	3	3	4	4	1	4	2	2	8	19	27
1418	2021-12-29	Second Year	male	13	＜6h/d	Specialties	Specialties	1.18182	5	2	2	5	5	3	1	3.28571	5	5	5	5	5	2	2	4.14286	2.87013	1	1	1	1	1	1	4	4	4	12	6	18	1	1	1	1	1	1	1	4	1	6	6	12
1419	2021-12-29	Second Year	female	14	＜6h/d	Undergraduate	High school and blow	1.04545	4	1	1	1	1	2	2	1.71429	1	1	1	1	1	2	2	1.28571	1.34848	1	1	1	1	1	1	3	3	3	9	6	15	1	1	1	1	1	1	4	4	4	12	6	18
1420	2021-12-29	Second Year	female	14	6-8h/d	Specialties	High school and blow	1.31818	3	1	1	1	1	3	3	1.85714	3	1	3	3	3	1	1	2.14286	1.77273	4	3	2	4	2	2	3	2	2	7	17	24	4	3	3	2	1	2	3	3	3	9	15	24
1421	2021-12-29	Second Year	male	13	＜6h/d	High school and blow	High school and blow	1	1	1	1	1	1	1	2	1.14286	1	1	1	1	1	2	1	1.14286	1.09524	1	1	1	1	1	1	4	4	4	12	6	18	4	4	4	4	4	4	1	1	1	3	24	27
1422	2021-12-29	Second Year	male	13	6-8h/d	Undergraduate	Undergraduate	1.13636	4	1	2	1	4	4	3	2.71429	1	1	1	1	1	2	2	1.28571	1.71212	1	1	1	1	1	1	4	4	4	12	6	18	1	1	1	1	1	1	4	4	4	12	6	18
1423	2021-12-29	Second Year	male	13	6-8h/d	Undergraduate	Undergraduate	1.54545	4	2	1	1	1	3	2	2	1	1	1	1	1	5	5	2.14286	1.8961	1	1	1	1	1	1	4	4	4	12	6	18	1	1	1	1	1	1	4	4	4	12	6	18
1424	2021-12-29	Second Year	female	13	6-8h/d	Undergraduate	Undergraduate	1.40909	3	1	1	1	1	1	1	1.28571	2	2	2	2	2	2	2	2	1.56494	1	3	2	1	1	1	3	3	3	9	9	18	1	3	2	1	1	1	3	3	3	9	9	18
1425	2021-12-29	Second Year	female	13	8-10h/d	Specialties	Specialties	1.81818	5	2	2	1	1	3	2	2.28571	3	3	3	3	3	4	4	3.28571	2.4632	2	3	3	1	3	2	4	2	3	9	14	23	2	3	3	1	3	3	4	2	3	9	15	24
1426	2021-12-29	Second Year	female	13	8-10h/d	High school and blow	Specialties	1.86364	3	5	5	1	5	4	4	3.85714	4	1	4	4	1	3	3	2.85714	2.85931	2	3	1	2	2	4	1	4	3	8	14	22	2	3	1	2	2	4	4	4	3	11	14	25
1427	2021-12-29	Second Year	male	14	6-8h/d	Undergraduate	Undergraduate	2.27273	4	1	1	1	2	4	4	2.42857	4	1	4	4	2	5	5	3.57143	2.75758	3	3	2	3	3	2	3	4	3	10	16	26	2	1	1	3	3	1	2	3	3	8	11	19
1428	2021-12-29	Second Year	female	13	6-8h/d	Specialties	High school and blow	1.54545	4	3	5	1	2	1	3	2.71429	1	1	1	1	1	2	2	1.28571	1.84848	4	4	3	1	1	3	4	4	2	10	16	26	4	4	3	1	1	3	4	4	2	10	16	26
1429	2021-12-29	Second Year	female	13	6-8h/d	High school and blow	High school and blow	1.54545	5	4	1	2	3	1	2	2.57143	1	1	1	1	1	3	3	1.57143	1.8961	2	4	3	3	3	2	3	3	2	8	17	25	3	3	3	3	3	3	2	2	2	6	18	24
1430	2021-12-29	Second Year	female	17	6-8h/d	High school and blow	High school and blow	1.27273	4	1	1	1	1	1	2	1.57143	1	1	1	1	1	1	1	1	1.28139	3	3	3	3	3	3	2	2	2	6	18	24	3	3	3	3	3	3	2	2	2	6	18	24
1431	2021-12-29	Senior Year	female	17	＜6h/d	Undergraduate	High school and blow	1.09091	3	1	1	1	1	3	1	1.57143	1	1	1	1	1	2	1	1.14286	1.2684	3	1	1	1	1	1	4	2	4	10	8	18	1	1	1	1	1	1	4	4	4	12	6	18
1432	2021-12-29	Senior Year	female	18	6-8h/d	High school and blow	Undergraduate	1.63636	4	2	2	2	3	3	2	2.57143	1	3	1	1	3	2	2	1.85714	2.02165	1	1	1	1	1	1	1	1	1	3	6	9	3	3	2	3	2	3	4	4	3	11	16	27
1433	2021-12-29	Second Year	male	17	6-8h/d	Undergraduate	Undergraduate	2.31818	5	5	5	5	5	5	1	4.42857	1	1	1	1	1	1	5	1.57143	2.77273	4	4	4	4	4	4	4	1	1	6	24	30	4	4	4	4	4	4	1	4	4	9	24	33
1434	2021-12-29	Senior Year	male	18	＜6h/d	Postgraduate and above	Postgraduate and above	1.45455	3	1	1	3	1	3	3	2.14286	1	2	1	1	2	1	1	1.28571	1.62771	3	2	2	3	3	3	2	2	2	6	16	22	3	3	3	3	3	3	2	2	2	6	18	24
1435	2021-12-29	Senior Year	male	18	6-8h/d	Specialties	Specialties	1	2	1	2	1	1	1	1	1.28571	1	1	1	1	1	1	1	1	1.09524	1	1	1	1	1	1	4	4	4	12	6	18	1	1	1	1	1	1	4	4	4	12	6	18
1436	2021-12-29	Senior Year	female	17	＜6h/d	Specialties	Specialties	1.04545	5	1	2	1	1	5	5	2.85714	3	3	3	3	3	3	3	3	2.30087	3	2	2	2	2	2	1	1	1	3	13	16	3	2	2	2	2	2	1	1	1	3	13	16
1437	2021-12-29	Senior Year	female	18	6-8h/d	Specialties	Specialties	1.40909	4	1	1	1	2	5	3	2.42857	1	5	1	1	5	1	1	2.14286	1.99351	3	3	3	3	3	3	2	2	2	6	18	24	3	3	3	3	3	3	2	2	2	6	18	24
1438	2021-12-29	Senior Year	male	17	6-8h/d	Undergraduate	Undergraduate	1.18182	5	1	3	1	1	3	3	2.42857	1	4	1	1	4	1	1	1.85714	1.82251	3	3	3	3	3	3	3	3	3	9	18	27	3	3	3	3	3	3	3	3	3	9	18	27
1439	2021-12-29	Senior Year	female	17	6-8h/d	High school and blow	High school and blow	1.45455	4	3	1	1	1	3	2	2.14286	2	1	2	1	2	2	2	1.71429	1.77056	3	3	3	3	3	3	3	3	3	9	18	27	3	3	3	3	3	3	3	3	4	10	18	28
1440	2021-12-29	Senior Year	male	18	6-8h/d	High school and blow	High school and blow	1.13636	3	4	2	3	1	3	2	2.57143	1	2	2	2	2	2	2	1.85714	1.85498	2	2	2	2	2	2	3	3	3	9	12	21	2	2	2	2	2	2	3	3	3	9	12	21
1441	2021-12-29	Senior Year	female	17	6-8h/d	High school and blow	High school and blow	1.04545	4	2	2	1	1	3	2	2.14286	1	2	1	1	2	2	2	1.57143	1.58658	3	2	3	3	2	3	4	4	3	11	16	27	4	3	3	2	3	3	4	4	4	12	18	30
1442	2021-12-29	Senior Year	male	18	6-8h/d	Specialties	Specialties	1.72727	5	4	3	5	5	5	5	4.57143	5	5	5	5	5	5	5	5	3.76623	4	4	4	4	4	4	3	3	3	9	24	33	4	4	4	4	4	4	3	3	3	9	24	33
1443	2021-12-29	Senior Year	male	18	＜6h/d	High school and blow	High school and blow	1.27273	2	1	1	3	4	4	2	2.42857	2	2	2	2	2	2	2	2	1.90043	3	3	3	3	3	3	2	2	2	6	18	24	3	3	3	3	3	3	2	2	2	6	18	24
1444	2021-12-29	Senior Year	male	18	6-8h/d	Undergraduate	High school and blow	1.13636	3	2	2	2	1	1	2	1.85714	3	3	3	3	3	2	1	2.57143	1.85498	3	3	3	3	3	3	2	2	2	6	18	24	3	3	3	3	3	3	4	4	4	12	18	30
1445	2021-12-29	Senior Year	female	17	6-8h/d	High school and blow	High school and blow	1.59091	3	1	1	1	1	1	3	1.57143	2	2	2	2	2	2	2	2	1.72078	1	1	1	1	1	1	4	4	4	12	6	18	1	1	1	1	1	1	4	4	4	12	6	18
1446	2021-12-29	Senior Year	male	18	6-8h/d	High school and blow	Undergraduate	1.45455	4	4	2	3	1	4	3	3	1	2	1	1	2	3	3	1.85714	2.1039	3	3	3	3	3	3	2	2	2	6	18	24	3	3	3	3	3	3	2	2	2	6	18	24
1447	2021-12-29	Senior Year	female	17	＜6h/d	Specialties	Undergraduate	1.27273	3	1	1	1	1	3	1	1.57143	1	1	1	1	1	1	1	1	1.28139	4	3	3	2	2	2	2	2	2	6	16	22	4	3	3	3	2	3	2	2	2	6	18	24
1448	2021-12-29	Senior Year	female	17	8-10h/d	High school and blow	High school and blow	1.31818	3	2	1	3	3	3	3	2.57143	3	3	3	3	1	1	2	2.28571	2.05844	3	3	3	2	2	2	2	3	3	8	15	23	2	2	3	2	2	2	3	3	3	9	13	22
1449	2021-12-29	Senior Year	female	18	6-8h/d	High school and blow	High school and blow	1.36364	5	1	1	1	1	2	3	2	2	2	2	2	2	1	1	1.71429	1.69264	2	2	2	2	3	3	4	4	4	12	14	26	2	2	2	2	3	3	4	4	4	12	14	26
1450	2021-12-29	Senior Year	male	18	6-8h/d	High school and blow	High school and blow	1.22727	4	1	2	1	1	2	1	1.71429	1	1	1	1	1	1	1	1	1.31385	2	1	1	1	1	3	3	3	4	10	9	19	3	3	3	3	2	3	4	4	4	12	17	29
1451	2021-12-29	Senior Year	male	18	6-8h/d	Undergraduate	High school and blow	1.68182	3	3	2	2	1	3	3	2.42857	2	2	2	2	2	2	2	2	2.0368	2	2	2	2	3	3	2	2	2	6	14	20	2	1	1	1	1	1	3	3	3	9	7	16
1452	2021-12-29	Senior Year	female	18	＜6h/d	High school and blow	High school and blow	1.36364	5	2	2	3	2	3	2	2.71429	3	4	3	4	3	4	4	3.57143	2.54978	2	2	2	2	2	2	3	3	3	9	12	21	2	2	2	2	2	2	3	3	3	9	12	21
1453	2021-12-29	Senior Year	female	17	＜6h/d	Specialties	High school and blow	1.77273	5	1	1	3	2	3	2	2.42857	2	2	2	2	2	2	2	2	2.0671	4	4	4	1	1	1	3	3	3	9	15	24	3	2	2	2	2	2	3	3	3	9	13	22
1454	2021-12-29	Senior Year	male	18	6-8h/d	High school and blow	Specialties	1.27273	4	3	3	2	4	4	3	3.28571	2	2	2	2	2	2	2	2	2.18615	1	3	3	4	3	2	4	4	4	12	16	28	2	2	2	2	1	1	4	4	4	12	10	22
1455	2021-12-29	Senior Year	male	17	＜6h/d	High school and blow	High school and blow	1.59091	2	1	1	3	1	1	1	1.42857	2	1	1	1	2	1	2	1.42857	1.48268	2	1	1	1	1	1	4	4	4	12	7	19	1	1	1	1	1	1	4	4	4	12	6	18
1456	2021-12-29	Senior Year	male	18	6-8h/d	High school and blow	High school and blow	1.5	3	1	1	3	2	1	2	1.85714	2	2	2	2	2	2	2	2	1.78571	3	2	2	2	3	2	3	3	3	9	14	23	3	2	2	2	3	2	3	3	3	9	14	23
1457	2021-12-29	Senior Year	male	17	＜6h/d	High school and blow	High school and blow	1.27273	3	1	2	1	1	3	2	1.85714	1	3	1	1	3	1	1	1.57143	1.5671	3	2	1	3	2	4	1	1	1	3	15	18	1	1	1	1	1	1	4	4	4	12	6	18
1458	2021-12-29	Senior Year	male	17	＜6h/d	Specialties	High school and blow	1.36364	4	1	1	1	1	2	2	1.71429	2	2	2	2	2	2	2	2	1.69264	2	3	2	2	2	3	2	2	2	6	14	20	2	3	2	2	2	3	2	2	2	6	14	20
1459	2021-12-29	Senior Year	female	18	6-8h/d	High school and blow	High school and blow	1.04545	5	1	1	1	1	1	1	1.57143	1	4	1	1	4	1	1	1.85714	1.49134	2	1	1	1	2	2	3	3	3	9	9	18	3	3	2	2	2	2	3	3	3	9	14	23
1460	2021-12-29	Senior Year	female	18	6-8h/d	High school and blow	Undergraduate	1.22727	3	2	1	1	1	2	1	1.57143	1	2	1	1	2	1	1	1.28571	1.36147	3	2	3	2	2	1	2	3	2	7	13	20	4	3	3	3	2	2	2	2	2	6	17	23
1461	2021-12-29	Senior Year	female	18	＜6h/d	High school and blow	High school and blow	1.63636	5	1	3	1	2	2	2	2.28571	1	1	1	1	1	2	2	1.28571	1.73593	3	3	3	2	2	2	3	2	3	8	15	23	3	3	3	2	2	2	3	2	3	8	15	23
1462	2021-12-29	Senior Year	female	18	＜6h/d	High school and blow	Specialties	1.36364	5	1	1	1	2	5	2	2.42857	2	3	1	1	3	2	2	2	1.93074	4	4	4	4	3	4	4	4	2	10	23	33	4	4	4	4	4	4	1	3	3	7	24	31
1463	2021-12-29	Senior Year	female	17	＜6h/d	Undergraduate	Undergraduate	1.45455	4	1	1	1	1	5	3	2.28571	2	4	1	1	4	1	1	2	1.91342	3	3	3	3	3	3	2	2	2	6	18	24	3	3	3	3	3	3	2	2	2	6	18	24
1464	2021-12-29	Senior Year	female	17	6-8h/d	Specialties	Specialties	1.22727	3	1	1	1	1	5	3	2.14286	2	4	2	2	4	2	2	2.57143	1.98052	3	3	3	3	3	3	2	2	2	6	18	24	3	3	3	3	3	3	2	2	2	6	18	24
1465	2021-12-29	Senior Year	male	17	6-8h/d	Specialties	Specialties	1.36364	5	1	1	2	2	2	3	2.28571	2	5	2	2	5	5	2	3.28571	2.31169	3	3	3	3	3	3	2	2	3	7	18	25	3	2	3	3	3	3	3	3	3	9	17	26
1466	2021-12-29	Senior Year	female	17	6-8h/d	Specialties	Specialties	1	2	1	1	1	1	1	1	1.14286	1	1	1	1	1	1	1	1	1.04762	4	4	4	4	4	4	1	1	1	3	24	27	4	4	4	4	4	4	1	1	1	3	24	27
1467	2021-12-29	Senior Year	male	18	＜6h/d	Specialties	High school and blow	1.5	5	2	2	3	1	3	3	2.71429	1	3	1	3	1	1	3	1.85714	2.02381	1	1	2	1	1	1	1	1	1	3	7	10	3	2	3	1	1	2	1	1	1	3	12	15
1468	2021-12-29	Senior Year	female	17	＜6h/d	High school and blow	High school and blow	1.22727	2	1	1	1	2	2	1	1.42857	1	2	1	1	1	2	2	1.42857	1.36147	3	3	3	3	3	2	4	4	4	12	17	29	2	2	2	2	3	2	3	3	3	9	13	22
1469	2021-12-29	First Year	female	12	8-10h/d	High school and blow	High school and blow	1.40909	3	2	1	1	1	1	2	1.57143	1	1	1	1	1	3	3	1.57143	1.51732	4	3	2	3	3	4	1	1	1	3	19	22	3	3	4	3	2	4	4	4	4	12	19	31
1470	2021-12-29	First Year	male	12	8-10h/d	Specialties	Specialties	1.40909	5	3	1	1	1	5	3	2.71429	5	1	5	5	3	2	3	3.42857	2.51732	3	1	1	1	1	1	4	1	4	9	8	17	1	1	1	1	1	1	4	4	4	12	6	18
1471	2021-12-29	First Year	female	13	6-8h/d	Undergraduate	Specialties	1.68182	3	1	1	3	4	3	4	2.71429	1	2	3	1	1	4	5	2.42857	2.27489	3	4	4	4	4	4	3	3	3	9	23	32	3	3	4	3	4	3	3	3	3	9	20	29
1472	2021-12-29	First Year	male	13	8-10h/d	High school and blow	High school and blow	1.54545	4	4	1	2	1	2	2	2.28571	2	2	2	2	2	3	2	2.14286	1.99134	3	3	4	4	2	2	2	2	2	6	18	24	3	3	2	4	4	2	2	2	2	6	18	24
1473	2021-12-29	First Year	male	13	6-8h/d	Undergraduate	Specialties	1.45455	4	3	1	2	2	3	3	2.57143	3	1	3	3	2	2	2	2.28571	2.1039	2	3	3	2	3	3	3	3	2	8	16	24	3	3	2	3	2	3	2	2	2	6	16	22
1474	2021-12-29	First Year	male	14	6-8h/d	Specialties	Specialties	1.81818	5	1	1	1	1	3	2	2	3	2	3	3	4	2	3	2.85714	2.22511	4	2	3	2	2	3	3	3	2	8	16	24	4	2	3	2	2	3	3	3	2	8	16	24
1475	2021-12-29	First Year	female	13	8-10h/d	High school and blow	High school and blow	1.68182	4	1	1	1	3	3	2	2.14286	2	2	2	2	3	4	4	2.71429	2.17965	3	3	3	2	2	3	3	3	3	9	16	25	3	3	3	2	2	3	3	3	3	9	16	25
1476	2021-12-29	First Year	female	12	6-8h/d	Specialties	Specialties	1.27273	4	1	1	1	1	3	1	1.71429	2	2	2	1	2	2	2	1.85714	1.61472	2	2	2	2	2	2	4	4	4	12	12	24	2	2	2	2	2	2	2	3	3	8	12	20
1477	2021-12-29	First Year	female	13	8-10h/d	Undergraduate	Undergraduate	1.63636	3	2	2	1	1	1	2	1.71429	2	2	2	3	4	4	3	2.85714	2.06926	2	1	4	3	2	1	4	4	3	11	13	24	3	2	2	1	1	2	3	4	4	11	11	22
1478	2021-12-29	First Year	male	12	8-10h/d	High school and blow	High school and blow	1.36364	3	2	2	2	2	3	2	2.28571	4	4	4	4	4	4	4	4	2.54978	2	2	2	3	2	3	3	3	3	9	14	23	4	3	3	3	2	3	3	3	3	9	18	27
1479	2021-12-29	First Year	male	12	6-8h/d	High school and blow	High school and blow	1.36364	4	2	1	1	1	2	2	1.85714	1	1	2	1	2	1	2	1.42857	1.54978	2	2	2	2	2	3	4	4	4	12	13	25	3	3	3	2	2	3	3	3	3	9	16	25
1480	2021-12-29	First Year	female	12	8-10h/d	Specialties	Specialties	1.27273	4	1	2	1	1	3	2	2	1	1	1	1	1	2	2	1.28571	1.51948	2	3	3	3	2	3	3	4	4	11	16	27	4	3	3	3	2	3	3	3	3	9	18	27
1481	2021-12-29	First Year	female	12	6-8h/d	High school and blow	Undergraduate	1.40909	5	2	1	1	4	3	3	2.71429	3	3	3	3	3	4	4	3.28571	2.4697	2	1	4	1	4	3	4	4	4	12	15	27	3	3	4	4	4	4	3	3	3	9	22	31
1482	2021-12-29	First Year	female	12	6-8h/d	Undergraduate	Specialties	1.72727	5	2	1	1	5	5	2	3	2	1	2	1	2	4	5	2.42857	2.38528	2	2	2	3	4	4	4	4	4	12	17	29	1	1	1	1	1	1	4	4	4	12	6	18
1483	2021-12-29	First Year	female	13	8-10h/d	Specialties	Specialties	1.77273	5	2	2	2	1	5	2	2.71429	1	1	1	1	3	5	5	2.42857	2.30519	4	2	3	2	3	2	3	3	3	9	16	25	4	4	4	3	2	3	3	3	3	9	20	29
1484	2021-12-29	First Year	female	12	6-8h/d	Undergraduate	Undergraduate	1.54545	3	2	2	1	1	1	2	1.71429	1	1	1	1	1	3	3	1.57143	1.61039	3	3	3	2	2	2	3	2	3	8	15	23	3	3	3	3	3	3	2	3	2	7	18	25
1485	2021-12-29	First Year	female	12	8-10h/d	Specialties	Undergraduate	3.31818	5	1	1	1	2	3	2	2.14286	1	2	2	2	2	2	2	1.85714	2.43939	4	4	4	4	4	4	4	4	4	12	24	36	4	4	4	4	4	4	4	4	4	12	24	36
1486	2021-12-29	First Year	female	12	6-8h/d	High school and blow	High school and blow	1.31818	5	1	1	1	1	3	2	2	1	1	1	1	1	4	4	1.85714	1.72511	3	3	3	3	3	2	1	1	1	3	17	20	3	3	2	3	3	2	2	2	2	6	16	22
1487	2021-12-29	First Year	female	12	6-8h/d	Specialties	Specialties	1.22727	4	2	3	1	3	3	2	2.57143	2	2	1	1	4	4	4	2.57143	2.12338	3	3	3	3	2	3	3	3	3	9	17	26	3	3	3	3	2	3	3	3	3	9	17	26
1488	2021-12-29	First Year	female	12	8-10h/d	High school and blow	High school and blow	1.18182	1	1	1	1	1	1	1	1	1	1	1	1	1	2	2	1.28571	1.15584	1	1	1	1	1	1	4	4	4	12	6	18	1	1	1	3	1	1	4	4	4	12	8	20
1489	2021-12-29	First Year	female	12	8-10h/d	High school and blow	High school and blow	1.81818	3	2	3	2	4	3	2	2.71429	2	3	1	1	2	4	4	2.42857	2.32035	3	3	2	3	1	3	4	4	4	12	15	27	3	3	3	3	2	3	4	4	4	12	17	29
1490	2021-12-29	First Year	female	13	6-8h/d	Specialties	Specialties	1.13636	2	1	1	1	1	1	2	1.28571	1	1	1	1	1	1	1	1	1.14069	3	3	3	3	2	2	2	1	1	4	16	20	2	2	2	2	2	1	4	4	4	12	11	23
1491	2021-12-29	First Year	female	13	6-8h/d	Undergraduate	Undergraduate	1.22727	4	1	1	1	1	2	2	1.71429	2	2	2	2	2	2	2	2	1.64719	3	3	3	3	3	3	3	3	4	10	18	28	3	3	3	3	3	3	3	3	4	10	18	28
1492	2021-12-29	First Year	male	12	6-8h/d	Specialties	Specialties	2.27273	5	1	1	2	1	5	1	2.28571	2	2	2	2	2	2	2	2	2.18615	3	4	4	3	3	4	1	1	1	3	21	24	4	4	4	4	4	4	1	1	1	3	24	27
1493	2021-12-29	First Year	female	13	6-8h/d	Specialties	Specialties	1.22727	1	1	1	1	1	4	2	1.57143	4	2	5	3	4	3	2	3.28571	2.02814	3	2	4	3	2	2	4	4	4	12	16	28	3	2	4	2	2	3	3	3	3	9	16	25
1494	2021-12-29	First Year	male	12	6-8h/d	Undergraduate	Undergraduate	1.13636	2	1	1	2	2	2	2	1.71429	1	1	1	1	1	3	3	1.57143	1.47403	3	3	3	3	3	2	3	3	3	9	17	26	3	3	3	3	3	3	3	3	3	9	18	27
1495	2021-12-29	First Year	male	13	6-8h/d	Specialties	Specialties	2.59091	5	1	1	1	1	2	5	2.28571	1	1	1	1	1	2	4	1.57143	2.14935	4	4	4	4	4	4	2	3	4	9	24	33	4	4	4	4	4	4	2	3	4	9	24	33
1496	2021-12-29	First Year	male	12	6-8h/d	Specialties	Specialties	1.09091	2	1	1	1	1	2	1	1.28571	1	1	1	1	1	1	2	1.14286	1.17316	4	4	4	4	4	4	2	2	2	6	24	30	4	4	4	4	4	4	2	2	2	6	24	30
1497	2021-12-29	First Year	male	13	8-10h/d	High school and blow	High school and blow	2.18182	5	2	1	3	2	4	3	2.85714	3	2	4	4	2	2	2	2.71429	2.58442	4	4	4	3	3	2	2	2	2	6	20	26	4	4	4	4	4	2	2	2	2	6	22	28
1498	2021-12-29	First Year	male	13	6-8h/d	Specialties	High school and blow	1.72727	5	5	4	4	4	4	5	4.42857	5	5	5	5	5	5	5	5	3.71861	3	3	3	3	3	3	4	4	4	12	18	30	3	3	3	3	3	3	4	4	4	12	18	30
1499	2021-12-29	First Year	male	13	8-10h/d	High school and blow	High school and blow	1.27273	3	1	2	2	2	3	3	2.28571	2	1	1	1	2	2	2	1.57143	1.70996	3	3	4	4	3	3	2	2	1	5	20	25	3	3	4	4	3	3	2	2	1	5	20	25
1500	2021-12-29	First Year	male	12	6-8h/d	Specialties	Specialties	1.22727	1	1	1	1	2	2	1	1.28571	1	1	1	1	2	2	2	1.42857	1.31385	3	3	3	3	1	1	4	4	4	12	14	26	3	3	3	3	4	4	3	3	2	8	20	28
1501	2021-12-29	First Year	male	13	8-10h/d	High school and blow	High school and blow	1.09091	4	3	3	3	1	3	2	2.71429	3	2	2	4	3	5	5	3.42857	2.41126	4	4	4	4	4	4	1	1	1	3	24	27	4	4	4	4	4	4	1	1	1	3	24	27
1502	2021-12-29	First Year	male	13	6-8h/d	Specialties	Specialties	1.45455	5	1	1	1	1	3	2	2	2	1	1	1	1	1	1	1.14286	1.53247	4	2	3	2	2	3	2	2	3	7	16	23	3	3	3	2	2	2	2	2	3	7	15	22
1503	2021-12-29	First Year	female	12	8-10h/d	Undergraduate	Undergraduate	1.5	4	1	1	1	3	4	4	2.57143	2	3	2	2	3	4	5	3	2.35714	2	4	3	3	3	3	3	3	2	8	18	26	3	3	3	3	2	2	3	3	3	9	16	25
1504	2021-12-29	First Year	male	13	6-8h/d	Specialties	Specialties	2.22727	5	5	2	5	2	5	4	4	5	5	5	5	5	5	5	5	3.74242	1	2	4	2	2	2	3	3	3	9	13	22	3	3	3	3	3	3	3	3	3	9	18	27
1505	2021-12-29	First Year	male	12	8-10h/d	High school and blow	High school and blow	1.54545	4	2	1	1	1	3	2	2	3	2	3	3	4	2	2	2.71429	2.08658	3	3	3	2	2	2	4	4	4	12	15	27	3	3	3	2	2	3	4	4	4	12	16	28
1506	2021-12-29	First Year	male	13	6-8h/d	High school and blow	High school and blow	1.40909	4	2	2	2	2	3	2	2.42857	2	2	2	2	2	4	4	2.57143	2.13636	2	2	2	2	2	2	3	3	3	9	12	21	3	3	3	3	3	3	3	3	3	9	18	27
1507	2021-12-29	First Year	male	13	8-10h/d	High school and blow	High school and blow	1.13636	3	1	2	2	2	2	2	2	2	2	2	2	2	2	2	2	1.71212	2	2	2	2	2	2	3	3	3	9	12	21	3	3	3	3	3	3	3	3	3	9	18	27
1508	2021-12-30	Second Year	male	14	6-8h/d	Specialties	Specialties	2.68182	5	2	1	2	5	5	4	3.42857	4	5	5	5	4	5	5	4.71429	3.60823	4	4	4	4	4	4	4	4	4	12	24	36	4	4	4	4	4	4	4	4	4	12	24	36
1509	2021-12-30	Second Year	female	12	6-8h/d	Undergraduate	Undergraduate	1.13636	3	1	1	1	1	1	1	1.28571	1	1	1	1	1	1	1	1	1.14069	3	3	3	3	3	3	3	3	3	9	18	27	3	3	3	3	3	3	3	3	3	9	18	27
1510	2021-12-30	Second Year	male	14	6-8h/d	Specialties	High school and blow	2.18182	5	2	5	3	2	4	1	3.14286	1	1	2	1	1	4	4	2	2.44156	1	2	2	2	1	1	3	4	4	11	9	20	3	2	2	2	2	2	3	3	3	9	13	22
1511	2021-12-30	Second Year	female	13	6-8h/d	Specialties	High school and blow	1.90909	4	2	2	2	2	5	3	2.85714	3	3	3	1	3	3	3	2.71429	2.49351	4	3	2	2	2	3	3	3	3	9	16	25	3	3	3	2	3	3	2	3	2	7	17	24
1512	2021-12-30	Second Year	male	14	6-8h/d	High school and blow	High school and blow	1.63636	5	1	1	1	1	1	5	2.14286	2	2	2	2	2	2	2	2	1.92641	3	3	3	2	4	4	1	3	1	5	19	24	1	1	1	1	1	1	4	4	4	12	6	18
1513	2021-12-30	Second Year	male	13	8-10h/d	High school and blow	High school and blow	1.09091	3	1	1	1	1	1	1	1.28571	1	1	1	1	1	1	1	1	1.12554	2	2	3	2	3	2	3	3	3	9	14	23	3	3	3	3	2	3	3	3	3	9	17	26
1514	2021-12-30	Second Year	male	14	6-8h/d	High school and blow	High school and blow	1.81818	3	1	1	1	1	3	2	1.71429	2	2	2	1	1	1	1	1.42857	1.65368	3	3	3	3	3	3	3	3	3	9	18	27	3	3	3	3	3	3	3	3	3	9	18	27
1515	2021-12-30	Second Year	female	14	6-8h/d	Specialties	Specialties	1.40909	4	1	2	1	3	3	2	2.28571	1	3	3	1	3	1	1	1.85714	1.85065	3	3	3	3	3	3	3	3	3	9	18	27	3	3	3	3	3	3	3	3	3	9	18	27
1516	2021-12-30	Second Year	female	14	＜6h/d	High school and blow	High school and blow	1.86364	2	1	2	1	4	2	2	2	2	2	2	2	2	2	2	2	1.95455	3	3	3	3	3	3	3	3	3	9	18	27	3	3	3	3	3	3	3	3	3	9	18	27
1517	2021-12-30	Second Year	female	13	6-8h/d	Specialties	Undergraduate	2.72727	5	2	3	1	5	5	4	3.57143	5	5	5	3	5	5	5	4.71429	3.671	4	3	3	4	4	4	4	4	4	12	22	34	4	4	4	4	3	2	4	4	4	12	21	33
1518	2021-12-30	Second Year	male	13	6-8h/d	High school and blow	High school and blow	1.59091	4	2	2	2	1	4	3	2.57143	4	4	4	2	4	3	3	3.42857	2.5303	3	2	2	2	2	2	3	3	3	9	13	22	3	2	2	2	2	2	3	3	3	9	13	22
1519	2021-12-30	Second Year	male	14	6-8h/d	Specialties	Specialties	1.45455	3	2	2	1	1	1	2	1.71429	2	2	2	2	1	1	2	1.71429	1.62771	3	3	3	3	3	3	3	3	3	9	18	27	3	3	3	3	3	3	3	3	3	9	18	27
1520	2021-12-30	Second Year	male	13	6-8h/d	High school and blow	High school and blow	2.86364	3	3	3	3	1	3	3	2.71429	3	3	3	4	4	3	3	3.28571	2.95455	3	3	3	3	3	3	3	3	3	9	18	27	3	3	3	3	3	3	3	3	3	9	18	27
1521	2021-12-30	Second Year	male	13	6-8h/d	High school and blow	High school and blow	1.68182	5	2	2	1	3	4	4	3	5	5	5	2	5	2	2	3.71429	2.7987	2	1	3	3	3	3	2	2	2	6	15	21	2	1	3	3	3	3	2	2	2	6	15	21
1522	2021-12-30	Second Year	female	13	6-8h/d	High school and blow	High school and blow	1.72727	3	1	1	1	4	4	3	2.42857	2	3	3	3	2	3	4	2.85714	2.33766	2	2	2	2	2	2	2	2	2	6	12	18	3	3	3	3	3	3	3	3	3	9	18	27
1523	2021-12-30	Second Year	male	13	6-8h/d	High school and blow	High school and blow	2.04545	5	1	1	5	3	5	4	3.42857	4	4	4	4	4	5	5	4.28571	3.25325	3	3	3	3	3	3	3	3	3	9	18	27	2	2	2	2	2	2	2	2	2	6	12	18
1524	2021-12-30	Second Year	male	14	＜6h/d	Specialties	Specialties	1.18182	4	1	1	2	1	3	2	2	2	2	2	2	2	4	4	2.57143	1.91775	3	3	3	2	4	2	3	2	2	7	17	24	3	3	3	3	3	2	3	2	2	7	17	24
1525	2021-12-30	Second Year	male	14	6-8h/d	High school and blow	High school and blow	1.63636	5	1	2	1	5	5	5	3.42857	5	5	5	5	5	5	5	5	3.35498	3	3	3	3	3	3	3	3	3	9	18	27	3	3	3	3	3	3	3	3	3	9	18	27
1526	2021-12-30	Second Year	male	14	6-8h/d	Specialties	Specialties	2	5	1	2	4	4	4	5	3.57143	3	3	4	1	2	5	5	3.28571	2.95238	2	2	2	2	2	2	2	2	2	6	12	18	3	3	3	3	3	3	3	3	3	9	18	27
1527	2021-12-30	Second Year	female	14	6-8h/d	Undergraduate	Specialties	2.09091	5	1	1	1	5	5	3	3	2	1	1	1	2	3	4	2	2.36364	3	3	3	3	3	3	3	3	3	9	18	27	3	3	3	3	3	3	3	3	3	9	18	27
1528	2021-12-30	Second Year	female	13	6-8h/d	High school and blow	High school and blow	1.81818	4	1	1	2	3	4	4	2.71429	2	5	5	3	4	1	2	3.14286	2.55844	4	4	4	4	4	4	4	4	4	12	24	36	4	4	4	4	4	4	4	4	4	12	24	36
1529	2021-12-30	Second Year	male	14	6-8h/d	Specialties	Specialties	1.18182	5	1	1	1	1	1	1	1.57143	4	4	4	4	4	1	1	3.14286	1.96537	1	1	1	1	1	1	1	1	1	3	6	9	3	3	3	3	3	3	3	3	3	9	18	27
1530	2021-12-30	Second Year	male	13	6-8h/d	Undergraduate	Specialties	1.77273	5	2	2	2	2	4	3	2.85714	3	3	3	3	3	3	3	3	2.54329	3	3	3	1	1	2	4	4	4	12	13	25	3	4	3	1	1	3	3	3	3	9	15	24
1531	2021-12-30	Second Year	male	13	8-10h/d	Undergraduate	Undergraduate	1.59091	5	1	1	1	1	1	1	1.57143	1	1	1	1	1	1	1	1	1.38745	3	3	3	3	3	3	2	2	2	6	18	24	4	4	4	4	4	4	1	1	1	3	24	27
1532	2021-12-30	Second Year	male	13	＞10h/d	Specialties	Specialties	3.90909	5	5	5	1	1	1	3	3	4	4	4	4	1	4	4	3.57143	3.49351	2	2	2	2	2	2	2	2	2	6	12	18	3	3	3	3	3	3	3	3	3	9	18	27
1533	2021-12-30	Second Year	female	13	6-8h/d	High school and blow	High school and blow	1	1	1	1	1	1	1	1	1	1	1	1	1	1	1	1	1	1	3	3	3	3	3	3	3	3	3	9	18	27	3	3	3	3	3	3	3	3	3	9	18	27
1534	2021-12-30	Second Year	male	14	6-8h/d	Undergraduate	Postgraduate and above	1.18182	4	2	2	3	3	1	1	2.28571	2	2	2	2	2	2	2	2	1.82251	3	3	3	3	3	3	3	3	3	9	18	27	3	3	3	3	3	3	3	3	3	9	18	27
1535	2021-12-30	Second Year	male	14	6-8h/d	Specialties	Specialties	3.31818	3	3	3	3	1	3	3	2.71429	4	4	4	4	4	4	4	4	3.34416	3	3	3	3	3	3	2	2	2	6	18	24	3	3	3	3	3	3	2	2	2	6	18	24
1536	2021-12-30	Second Year	female	14	6-8h/d	High school and blow	High school and blow	1.22727	5	1	1	1	1	4	3	2.28571	3	3	3	3	3	3	3	3	2.171	4	4	4	4	4	4	4	4	4	12	24	36	4	4	4	4	4	4	4	4	4	12	24	36
1537	2021-12-30	Second Year	female	14	6-8h/d	Specialties	Undergraduate	1.36364	5	2	3	2	2	4	3	3	3	3	3	3	3	3	3	3	2.45455	3	3	3	3	3	3	3	3	3	9	18	27	2	2	2	2	2	2	2	2	2	6	12	18
1538	2021-12-30	Second Year	male	14	8-10h/d	Specialties	High school and blow	1.68182	5	1	5	2	4	3	3	3.28571	2	2	3	1	4	5	5	3.14286	2.70346	3	3	3	3	3	3	3	3	3	9	18	27	2	2	2	2	2	2	2	2	2	6	12	18
1539	2021-12-30	Second Year	female	13	8-10h/d	Specialties	Specialties	1.27273	5	1	1	2	1	2	2	2	1	4	4	1	3	2	4	2.71429	1.99567	3	3	3	3	3	3	3	3	3	9	18	27	3	3	3	3	3	3	3	3	3	9	18	27
1540	2021-12-30	Second Year	male	14	6-8h/d	Specialties	Specialties	1.81818	4	1	2	2	5	5	3	3.14286	2	4	4	2	4	2	1	2.71429	2.55844	2	2	2	2	2	2	2	2	2	6	12	18	2	2	2	2	2	2	2	2	2	6	12	18
1541	2021-12-30	Second Year	male	14	6-8h/d	Specialties	Specialties	1.77273	4	1	2	1	4	3	4	2.71429	1	1	2	3	4	5	5	3	2.49567	3	3	3	3	3	3	3	3	3	9	18	27	3	3	3	3	3	3	3	3	3	9	18	27
1542	2021-12-30	Second Year	male	14	6-8h/d	Specialties	High school and blow	1.36364	5	1	1	1	3	3	2	2.28571	2	2	2	2	4	5	5	3.14286	2.26407	3	2	2	3	3	3	4	4	4	12	16	28	3	3	3	3	3	2	4	4	4	12	17	29
1543	2021-12-30	Second Year	female	13	6-8h/d	High school and blow	High school and blow	1.40909	5	1	1	3	2	2	1	2.14286	3	4	4	2	4	2	2	3	2.18398	3	3	3	3	3	3	3	3	3	9	18	27	3	3	3	3	3	3	3	3	3	9	18	27
1544	2021-12-30	Second Year	male	14	6-8h/d	High school and blow	High school and blow	2.31818	5	4	2	4	5	5	3	4	2	4	4	3	4	4	4	3.57143	3.29654	2	2	2	2	2	2	2	2	2	6	12	18	2	2	2	2	2	2	2	2	2	6	12	18
1545	2021-12-30	Second Year	male	14	6-8h/d	Undergraduate	Undergraduate	1.77273	4	2	2	3	3	5	5	3.42857	4	4	3	2	5	5	5	4	3.0671	3	3	3	3	3	3	3	3	3	9	18	27	3	3	3	3	3	3	3	3	3	9	18	27
1546	2021-12-30	Second Year	female	13	8-10h/d	Specialties	Specialties	1.72727	4	2	2	3	4	4	3	3.14286	1	2	1	1	2	4	4	2.14286	2.33766	3	3	3	3	3	3	3	3	3	9	18	27	3	3	3	3	3	3	3	3	3	9	18	27
1547	2021-12-30	Second Year	male	13	6-8h/d	High school and blow	Specialties	2.59091	3	1	1	1	2	3	3	2	2	2	2	3	1	1	1	1.71429	2.10173	3	3	3	3	3	3	3	3	3	9	18	27	2	2	2	2	2	2	2	2	2	6	12	18
1548	2021-12-30	Second Year	female	13	6-8h/d	High school and blow	High school and blow	1.68182	5	1	2	1	1	4	4	2.57143	5	5	5	5	5	1	1	3.85714	2.70346	3	3	3	3	3	3	3	3	3	9	18	27	3	3	3	3	3	3	3	3	3	9	18	27
1549	2021-12-30	Second Year	male	14	6-8h/d	Specialties	Specialties	1.95455	5	1	1	5	5	5	5	3.85714	3	3	3	4	4	5	5	3.85714	3.22294	4	4	4	4	3	1	2	4	4	10	20	30	4	4	4	4	3	1	2	4	4	10	20	30
1550	2021-12-30	Second Year	female	13	6-8h/d	Undergraduate	High school and blow	1.77273	3	2	3	3	1	2	1	2.14286	1	1	1	1	1	1	1	1	1.63853	2	3	3	3	3	1	4	4	4	12	15	27	3	3	3	2	2	3	4	4	4	12	16	28
1551	2021-12-30	Second Year	female	13	6-8h/d	Specialties	Specialties	1.18182	4	1	2	1	1	2	1	1.71429	3	3	3	3	3	1	1	2.42857	1.77489	4	2	3	3	2	2	4	4	4	12	16	28	4	2	3	3	2	2	4	4	4	12	16	28
1552	2021-12-30	Second Year	female	13	＜6h/d	Specialties	Undergraduate	1.77273	5	1	2	1	1	4	2	2.28571	1	1	1	1	1	2	3	1.42857	1.829	3	3	3	3	3	3	3	3	3	9	18	27	2	2	2	2	2	2	2	2	2	6	12	18
1553	2021-12-30	Second Year	male	13	6-8h/d	High school and blow	High school and blow	1.22727	3	2	2	1	1	1	2	1.71429	1	1	1	1	1	1	1	1	1.31385	3	3	3	3	3	3	3	3	3	9	18	27	3	3	3	3	3	3	3	3	3	9	18	27
1554	2021-12-30	Second Year	male	13	8-10h/d	High school and blow	Undergraduate	1.5	4	2	2	3	3	4	2	2.85714	3	3	3	3	3	4	4	3.28571	2.54762	3	3	3	3	3	3	2	2	2	6	18	24	3	3	3	3	3	3	2	2	2	6	18	24
1555	2021-12-30	Second Year	female	13	8-10h/d	Specialties	Specialties	1.68182	5	2	1	5	3	5	5	3.71429	2	3	4	2	4	4	4	3.28571	2.89394	3	3	3	3	3	3	3	3	3	9	18	27	2	2	2	2	2	2	2	2	2	6	12	18
1556	2021-12-30	Second Year	male	14	8-10h/d	Specialties	Specialties	1.31818	3	2	2	1	1	1	2	1.71429	2	2	2	2	1	1	2	1.71429	1.58225	3	3	3	3	3	3	3	3	3	9	18	27	3	3	3	3	3	3	3	3	3	9	18	27
1557	2021-12-30	Second Year	male	14	8-10h/d	High school and blow	High school and blow	1.18182	3	2	2	2	1	1	2	1.85714	2	2	2	2	1	1	2	1.71429	1.58442	4	4	4	4	3	3	3	3	3	9	22	31	4	3	3	3	2	2	3	3	3	9	17	26
1558	2021-12-29	Second Year	male	13	6-8h/d	Specialties	Undergraduate	2	5	5	5	1	4	4	4	4	2	4	3	3	3	5	4	3.42857	3.14286	1	1	1	1	1	3	4	4	4	12	8	20	3	3	3	3	3	3	2	2	2	6	18	24
1559	2021-12-30	Second Year	female	14	6-8h/d	Undergraduate	Undergraduate	1.40909	5	3	3	1	1	2	2	2.42857	2	2	2	2	2	2	1	1.85714	1.89827	3	3	3	3	3	2	3	3	3	9	17	26	2	2	2	2	2	4	3	3	3	9	14	23
1560	2021-12-29	Second Year	female	13	6-8h/d	High school and blow	High school and blow	1.45455	5	1	1	1	4	3	3	2.57143	1	3	4	3	1	1	2	2.14286	2.05628	1	1	1	3	3	3	3	2	3	8	12	20	4	4	4	4	4	4	1	1	3	5	24	29
1561	2021-12-29	Second Year	female	13	6-8h/d	Specialties	Specialties	1.36364	5	1	4	2	1	4	2	2.71429	2	3	2	1	2	5	5	2.85714	2.31169	3	3	3	3	3	3	2	2	2	6	18	24	3	3	3	3	3	3	2	2	2	6	18	24
1562	2021-12-29	Second Year	female	14	6-8h/d	Undergraduate	Undergraduate	1.04545	5	1	1	1	1	1	1	1.57143	1	2	2	2	1	1	1	1.42857	1.34848	3	2	2	2	2	2	3	3	3	9	13	22	2	2	2	2	2	2	3	3	3	9	12	21
1563	2021-12-29	Second Year	male	14	6-8h/d	High school and blow	High school and blow	1.31818	2	2	1	2	1	3	1	1.71429	2	3	3	3	3	3	3	2.85714	1.9632	2	2	2	2	2	2	4	2	4	10	12	22	2	2	2	2	2	2	4	4	4	12	12	24
1564	2021-12-29	Second Year	female	14	6-8h/d	Undergraduate	Specialties	1.27273	3	1	1	1	3	5	3	2.42857	2	3	3	3	2	3	2	2.57143	2.09091	3	4	4	2	4	3	3	3	3	9	20	29	2	2	2	3	3	2	3	3	3	9	14	23
1565	2021-12-29	Second Year	female	14	6-8h/d	Undergraduate	Undergraduate	1.54545	4	3	4	3	3	4	2	3.28571	2	2	3	3	2	2	2	2.28571	2.37229	3	3	3	3	3	3	4	4	4	12	18	30	3	3	3	3	3	3	4	4	4	12	18	30
1566	2021-12-29	Second Year	female	14	6-8h/d	Undergraduate	Undergraduate	1.72727	3	1	1	3	3	3	2	2.28571	3	3	3	3	3	3	3	3	2.33766	4	4	4	4	4	4	4	4	4	12	24	36	3	3	3	3	3	3	3	3	3	9	18	27
1567	2021-12-29	Second Year	female	14	6-8h/d	Undergraduate	Undergraduate	2.31818	4	1	1	4	3	3	2	2.57143	2	2	2	2	2	3	3	2.28571	2.39177	3	3	4	4	3	4	3	4	4	11	21	32	3	3	3	3	3	3	3	3	3	9	18	27
1568	2021-12-29	Second Year	male	14	8-10h/d	Undergraduate	Undergraduate	2.13636	4	1	1	3	2	4	3	2.57143	4	4	4	4	4	4	4	4	2.9026	3	3	3	3	3	3	2	2	2	6	18	24	3	3	3	3	3	3	2	2	2	6	18	24
1569	2021-12-29	Second Year	male	14	6-8h/d	Undergraduate	Undergraduate	1.27273	5	2	1	1	1	4	3	2.42857	2	3	3	3	1	1	1	2	1.90043	3	3	3	3	3	3	2	2	2	6	18	24	3	3	3	3	3	3	3	2	2	7	18	25
1570	2021-12-19	Second Year	female	13	6-8h/d	Specialties	Specialties	1.13636	3	1	1	2	2	2	3	2	1	4	4	4	4	2	3	3.14286	2.09307	4	4	4	2	4	4	4	4	4	12	22	34	1	1	1	1	4	1	4	4	4	12	9	21
1571	2021-12-29	Second Year	female	13	6-8h/d	Specialties	Specialties	1.54545	4	1	1	1	1	5	3	2.28571	3	3	4	4	4	3	2	3.28571	2.37229	2	2	3	3	2	3	3	4	4	11	15	26	1	1	1	2	3	2	1	3	3	7	10	17
1572	2021-12-29	Second Year	female	13	8-10h/d	High school and blow	Undergraduate	1.54545	5	2	2	1	1	3	2	2.28571	2	2	3	3	4	4	5	3.28571	2.37229	3	3	3	3	2	1	4	4	4	12	15	27	3	3	3	2	2	2	3	4	4	11	15	26
1573	2021-12-29	Second Year	male	14	6-8h/d	High school and blow	High school and blow	1.31818	5	1	2	1	1	3	2	2.14286	1	1	1	1	1	1	1	1	1.48701	3	2	2	2	4	2	3	2	2	7	15	22	3	2	2	2	3	2	3	3	3	9	14	23
1574	2021-12-29	Second Year	male	14	8-10h/d	Postgraduate and above	Postgraduate and above	2.95455	5	4	1	1	3	4	4	3.14286	1	2	3	4	5	4	3	3.14286	3.08009	1	2	4	4	3	2	4	3	2	9	16	25	4	4	4	4	3	2	2	1	1	4	21	25
1575	2021-12-29	Second Year	female	13	6-8h/d	High school and blow	High school and blow	2.18182	4	2	2	2	2	5	5	3.14286	3	4	4	4	3	5	5	4	3.10823	4	4	4	4	4	4	4	4	4	12	24	36	4	3	2	4	1	4	1	4	4	9	18	27
1576	2021-12-29	Second Year	female	13	＜6h/d	High school and blow	High school and blow	1.63636	5	1	1	2	1	3	1	2	2	4	4	4	2	2	2	2.85714	2.1645	4	3	4	2	2	2	4	4	4	12	17	29	2	2	2	2	2	3	3	3	3	9	13	22
1577	2021-12-29	Second Year	male	14	6-8h/d	Specialties	High school and blow	1.72727	3	2	2	3	2	4	3	2.71429	1	2	2	2	1	3	4	2.14286	2.19481	3	3	3	2	3	2	4	4	3	11	16	27	3	3	3	2	4	2	3	3	3	9	17	26
1578	2021-12-29	Second Year	female	13	6-8h/d	High school and blow	High school and blow	1.27273	4	1	2	1	3	3	2	2.28571	2	4	2	1	4	2	3	2.57143	2.04329	2	3	2	2	3	2	2	3	3	8	14	22	2	2	2	2	2	2	3	3	3	9	12	21
1579	2021-12-29	Second Year	male	14	6-8h/d	Specialties	Specialties	1.63636	3	1	1	1	1	5	4	2.28571	3	3	3	3	3	4	4	3.28571	2.4026	3	4	4	2	2	3	4	4	4	12	18	30	3	3	3	2	2	3	4	4	4	12	16	28
1580	2021-12-29	Second Year	female	13	6-8h/d	Undergraduate	Undergraduate	1.27273	5	1	1	1	3	5	1	2.42857	2	2	2	2	3	4	4	2.71429	2.13853	3	3	2	3	3	2	3	3	3	9	16	25	2	2	2	2	2	3	3	3	3	9	13	22
1581	2021-12-29	Second Year	female	13	6-8h/d	High school and blow	Specialties	1.63636	5	2	2	2	3	5	5	3.42857	5	5	5	5	5	5	5	5	3.35498	4	4	4	4	4	4	4	4	3	11	24	35	4	3	3	3	2	2	4	4	4	12	17	29
1582	2021-12-29	Second Year	female	14	＜6h/d	High school and blow	High school and blow	1.45455	5	1	1	1	1	1	2	1.71429	1	1	1	1	2	4	4	2	1.72294	2	2	2	2	2	3	3	3	3	9	13	22	2	2	2	2	2	2	3	3	3	9	12	21
1583	2021-12-29	Second Year	male	13	8-10h/d	Undergraduate	High school and blow	1.40909	4	3	4	5	4	5	4	4.14286	3	3	4	4	4	5	5	4	3.18398	2	3	3	2	3	2	3	3	3	9	15	24	2	3	3	2	3	2	3	3	3	9	15	24
1584	2021-12-29	Second Year	female	14	6-8h/d	High school and blow	High school and blow	1.5	5	1	1	1	1	4	3	2.28571	3	3	3	3	3	1	1	2.42857	2.07143	3	2	3	1	3	3	4	4	3	11	15	26	3	2	1	1	1	3	4	4	4	12	11	23
1585	2021-12-29	Second Year	female	13	＜6h/d	Specialties	Specialties	1.63636	5	4	3	2	3	5	4	3.71429	2	5	5	5	2	1	1	3	2.78355	3	3	3	3	3	1	3	3	2	8	16	24	3	3	3	3	3	1	3	3	2	8	16	24
1586	2021-12-29	Second Year	male	13	6-8h/d	High school and blow	High school and blow	1.18182	3	1	2	1	2	2	2	1.85714	1	2	2	2	3	3	3	2.28571	1.77489	4	4	4	3	4	4	4	4	4	12	23	35	3	3	3	3	3	4	4	4	4	12	19	31
1587	2021-12-29	Second Year	female	13	＜6h/d	Specialties	High school and blow	1.09091	4	2	1	2	1	2	1	1.85714	1	1	1	1	1	1	1	1	1.31602	3	3	3	3	3	3	3	3	3	9	18	27	3	3	3	3	3	3	3	3	3	9	18	27
1588	2021-12-29	Second Year	female	13	6-8h/d	High school and blow	High school and blow	1.90909	5	3	1	2	2	2	2	2.42857	2	2	2	2	2	2	2	2	2.11255	3	2	2	1	2	3	3	2	3	8	13	21	2	2	2	2	2	3	2	2	2	6	13	19
1589	2021-12-29	Second Year	female	14	6-8h/d	High school and blow	Specialties	1.54545	4	1	2	1	2	3	2	2.14286	2	3	3	3	3	4	5	3.28571	2.32468	4	3	3	3	3	2	2	3	3	8	18	26	4	2	2	3	4	2	3	3	3	9	17	26
1590	2021-12-29	Second Year	male	14	6-8h/d	Undergraduate	High school and blow	1.36364	5	3	1	2	1	3	3	2.57143	2	3	4	2	1	4	4	2.85714	2.26407	2	2	3	2	3	4	2	3	3	8	16	24	3	2	2	4	3	4	1	3	4	8	18	26
1591	2021-12-29	Second Year	female	13	6-8h/d	Undergraduate	Undergraduate	1.5	5	2	2	1	1	3	3	2.42857	3	4	4	4	4	3	3	3.57143	2.5	4	4	4	4	4	4	1	1	1	3	24	27	4	4	4	4	4	4	1	1	1	3	24	27
1592	2021-12-29	Second Year	male	13	6-8h/d	Undergraduate	Undergraduate	1.81818	5	1	3	3	3	3	3	3	3	3	3	3	2	4	3	3	2.60606	3	3	3	2	2	2	3	2	2	7	15	22	3	3	3	2	2	2	3	2	2	7	15	22
1593	2021-12-29	Second Year	female	14	6-8h/d	High school and blow	High school and blow	1.54545	5	1	2	1	3	4	3	2.71429	1	2	2	2	2	3	3	2.14286	2.1342	4	4	4	4	4	4	3	3	3	9	24	33	1	1	1	1	3	4	4	4	4	12	11	23
1594	2021-12-29	Second Year	female	13	6-8h/d	High school and blow	High school and blow	1.63636	5	1	1	1	1	3	2	2	1	2	3	3	2	4	4	2.71429	2.11688	1	1	1	2	2	3	4	4	3	11	10	21	1	1	1	1	1	1	4	4	4	12	6	18
1595	2021-12-29	Second Year	female	13	6-8h/d	Undergraduate	Undergraduate	1.27273	5	1	1	1	1	5	3	2.42857	1	3	3	3	1	1	1	1.85714	1.85281	4	4	4	4	4	4	3	3	3	9	24	33	4	4	4	4	4	4	3	3	3	9	24	33
1596	2021-12-29	Second Year	female	13	6-8h/d	High school and blow	High school and blow	2.13636	5	1	3	2	2	3	2	2.57143	2	2	2	2	2	2	2	2	2.23593	1	1	1	1	1	1	3	3	3	9	6	15	1	1	1	1	1	1	3	3	3	9	6	15
1597	2021-12-29	Second Year	female	13	6-8h/d	Undergraduate	Postgraduate and above	1.54545	5	1	1	1	1	4	3	2.28571	4	2	1	1	2	1	1	1.71429	1.84848	3	3	4	1	3	2	4	4	4	12	16	28	4	4	4	4	1	1	4	4	4	12	18	30
1598	2021-12-29	Second Year	male	13	6-8h/d	High school and blow	High school and blow	1.59091	5	1	1	1	1	3	2	2	1	1	1	1	1	1	1	1	1.5303	3	2	2	2	2	3	3	3	3	9	14	23	3	2	2	2	2	2	3	3	3	9	13	22
1599	2021-12-29	Second Year	male	14	6-8h/d	Undergraduate	High school and blow	1.90909	5	1	3	1	1	3	3	2.42857	4	4	4	4	2	5	1	3.42857	2.58874	3	2	2	3	4	2	3	4	4	11	16	27	4	4	4	4	4	2	3	4	4	11	22	33
1600	2021-12-29	Second Year	male	14	6-8h/d	High school and blow	High school and blow	1.27273	4	1	2	2	1	3	1	2	1	3	3	3	1	1	1	1.85714	1.70996	3	3	3	2	2	2	4	4	4	12	15	27	3	3	3	2	2	2	4	4	4	12	15	27
1601	2021-12-29	Second Year	male	14	6-8h/d	High school and blow	High school and blow	1.72727	5	1	2	1	1	5	2	2.42857	2	4	4	4	2	3	3	3.14286	2.4329	4	3	2	2	3	3	3	3	3	9	17	26	3	3	3	2	4	4	3	3	3	9	19	28
1602	2021-12-29	Second Year	female	14	6-8h/d	High school and blow	Specialties	1.31818	5	1	1	1	1	5	3	2.42857	3	3	3	3	3	3	3	3	2.24892	4	2	2	2	3	3	3	3	3	9	16	25	1	1	1	1	1	1	4	4	4	12	6	18
1603	2021-12-29	Second Year	female	13	6-8h/d	High school and blow	High school and blow	1.5	3	1	1	1	3	4	3	2.28571	2	3	3	3	1	1	1	2	1.92857	1	1	1	1	1	1	4	4	4	12	6	18	1	1	1	1	1	1	4	4	4	12	6	18
1604	2021-12-29	Second Year	female	13	6-8h/d	Specialties	Undergraduate	1.5	1	1	1	1	4	4	1	1.85714	1	1	1	1	1	1	1	1	1.45238	4	3	2	1	1	1	4	4	4	12	12	24	1	1	1	1	1	1	4	4	4	12	6	18
1605	2021-12-29	Second Year	female	14	6-8h/d	High school and blow	High school and blow	1.86364	4	2	1	1	1	2	1	1.71429	2	2	2	2	1	1	1	1.57143	1.71645	4	3	3	3	4	2	4	4	4	12	19	31	2	3	4	2	2	4	4	4	4	12	17	29
1606	2021-12-29	Second Year	male	13	6-8h/d	Undergraduate	Undergraduate	1.18182	3	1	1	1	1	3	2	1.71429	1	3	4	4	1	1	2	2.28571	1.72727	3	3	3	3	3	3	2	2	2	6	18	24	3	3	3	3	3	3	2	2	2	6	18	24
1607	2021-12-29	Second Year	male	13	6-8h/d	Specialties	Specialties	1.09091	4	1	1	1	1	1	2	1.57143	1	2	2	2	1	1	1	1.42857	1.36364	4	4	3	3	3	3	2	2	2	6	20	26	4	3	3	3	3	3	2	2	2	6	19	25
1608	2021-12-29	Second Year	female	14	6-8h/d	High school and blow	High school and blow	1.36364	4	2	3	1	3	5	2	2.85714	2	4	4	4	3	3	3	3.28571	2.50216	2	3	2	3	4	3	3	3	3	9	17	26	3	3	3	3	3	3	2	2	2	6	18	24
1609	2021-12-29	Second Year	male	13	6-8h/d	Undergraduate	Undergraduate	1.63636	4	2	2	1	2	4	3	2.57143	3	3	3	3	3	3	3	3	2.4026	4	4	4	4	4	4	2	2	2	6	24	30	4	4	4	4	4	4	1	1	1	3	24	27
1610	2021-12-30	Senior One	male	16	＜6h/d	High school and blow	High school and blow	2.27273	5	1	2	1	5	5	5	3.42857	5	5	4	4	5	3	1	3.85714	3.18615	3	3	3	3	3	3	3	3	3	9	18	27	3	3	3	3	3	3	3	3	3	9	18	27
1611	2021-12-30	Senior One	female	15	6-8h/d	Specialties	Undergraduate	1.68182	5	1	2	1	1	2	2	2	4	3	3	4	3	5	5	3.85714	2.51299	2	3	4	4	4	4	3	3	4	10	21	31	3	3	3	3	3	3	3	3	3	9	18	27
1612	2021-12-30	Senior One	female	17	6-8h/d	High school and blow	High school and blow	1.18182	3	1	1	1	1	2	2	1.57143	1	1	1	1	1	1	1	1	1.25108	2	2	2	4	2	3	2	1	1	4	15	19	2	2	3	2	1	1	4	4	2	10	11	21
1613	2021-12-30	Senior One	female	15	6-8h/d	High school and blow	High school and blow	1.04545	3	2	2	1	1	1	1	1.57143	1	1	1	1	1	1	1	1	1.20563	3	3	3	3	3	2	4	4	4	12	17	29	1	1	1	1	3	2	4	4	4	12	9	21
1614	2021-12-30	Senior One	male	16	＜6h/d	High school and blow	High school and blow	1.40909	5	1	2	2	3	4	2	2.71429	2	3	4	4	5	5	5	4	2.70779	3	2	3	3	2	2	3	2	2	7	15	22	3	3	3	2	2	3	3	2	2	7	16	23
1615	2021-12-30	Senior One	female	15	6-8h/d	Undergraduate	Undergraduate	1.09091	3	2	1	1	1	3	1	1.71429	1	1	1	1	1	1	1	1	1.2684	3	3	3	3	3	3	2	2	2	6	18	24	3	3	3	3	3	3	2	2	2	6	18	24
1616	2021-12-30	Senior One	male	15	6-8h/d	Specialties	Specialties	1.13636	3	1	1	1	1	1	2	1.42857	2	1	1	1	1	1	2	1.28571	1.28355	3	3	3	3	3	3	3	3	3	9	18	27	3	3	3	3	3	3	3	3	3	9	18	27
1617	2021-12-30	Senior One	male	15	6-8h/d	High school and blow	High school and blow	1.18182	5	1	1	2	1	1	3	2	5	1	1	5	1	1	1	2.14286	1.77489	4	1	1	1	1	1	2	2	4	8	9	17	3	1	1	1	1	3	4	1	2	7	10	17
1618	2021-12-30	Senior One	male	15	＜6h/d	High school and blow	High school and blow	1.81818	5	2	1	2	1	3	2	2.28571	4	2	2	4	2	4	1	2.71429	2.27273	3	2	2	2	2	2	4	4	4	12	13	25	2	2	2	2	2	2	3	3	2	8	12	20
1619	2021-12-30	Senior One	male	16	6-8h/d	High school and blow	High school and blow	1.5	4	1	1	2	2	3	2	2.14286	4	2	2	4	2	2	2	2.57143	2.07143	3	3	3	2	3	2	3	3	3	9	16	25	2	2	2	3	3	2	3	3	3	9	14	23
1620	2021-12-30	Senior One	female	15	6-8h/d	Undergraduate	Specialties	2.04545	4	2	2	2	4	4	2	2.85714	3	1	1	3	3	3	1	2.14286	2.34848	3	3	3	3	3	3	2	3	3	8	18	26	3	3	3	3	3	3	3	3	3	9	18	27
1621	2021-12-30	Senior One	female	15	6-8h/d	Specialties	High school and blow	1.09091	3	1	1	1	1	3	2	1.71429	3	1	1	3	2	2	2	2	1.60173	3	3	3	3	1	3	4	3	4	11	16	27	3	3	3	3	3	3	2	2	2	6	18	24
1622	2021-12-30	Senior One	female	16	6-8h/d	Undergraduate	Undergraduate	1.18182	1	1	1	1	1	2	1	1.14286	1	1	1	1	1	1	1	1	1.10823	3	3	3	3	3	3	3	3	3	9	18	27	3	3	3	3	3	3	3	3	3	9	18	27
1623	2021-12-30	Senior One	female	15	6-8h/d	Undergraduate	High school and blow	1.59091	3	1	1	1	1	4	2	1.85714	1	2	3	1	4	1	5	2.42857	1.95887	3	2	3	3	3	3	2	2	2	6	17	23	3	3	3	3	3	3	2	2	2	6	18	24
1624	2021-12-30	Senior One	female	16	6-8h/d	High school and blow	High school and blow	1.04545	3	1	1	1	1	2	1	1.42857	1	1	1	1	1	1	1	1	1.15801	3	3	3	3	3	3	2	2	2	6	18	24	3	3	3	3	3	3	2	2	2	6	18	24
1625	2021-12-30	Senior One	male	16	6-8h/d	Specialties	Specialties	1.18182	5	1	1	2	1	2	2	2	2	2	2	2	2	2	2	2	1.72727	3	3	3	3	3	3	3	3	3	9	18	27	3	3	3	3	3	3	3	3	3	9	18	27
1626	2021-12-30	Senior One	male	16	6-8h/d	Undergraduate	Undergraduate	1.59091	5	4	4	5	4	5	5	4.57143	3	2	3	5	5	5	5	4	3.38745	2	4	4	2	3	3	3	4	4	11	18	29	1	1	1	3	3	1	2	2	2	6	10	16
1627	2021-12-30	Senior One	female	15	6-8h/d	High school and blow	High school and blow	1.27273	4	3	2	2	2	3	2	2.57143	3	2	1	3	2	2	1	2	1.94805	3	3	3	3	3	2	3	2	3	8	17	25	2	2	2	3	3	2	2	2	2	6	14	20
1628	2021-12-30	Senior One	female	15	＜6h/d	Undergraduate	Undergraduate	1.09091	2	2	2	1	1	2	1	1.57143	1	1	2	1	3	2	1	1.57143	1.41126	2	3	3	3	1	1	4	4	4	12	13	25	2	2	2	3	2	1	4	4	4	12	12	24
1629	2021-12-30	Senior One	female	16	6-8h/d	Specialties	Specialties	1.45455	4	1	1	1	1	2	2	1.71429	3	3	3	3	3	2	2	2.71429	1.96104	4	4	4	3	3	3	3	4	4	11	21	32	4	4	4	3	3	3	3	4	4	11	21	32
1630	2021-12-30	Senior One	female	16	6-8h/d	Undergraduate	Undergraduate	1.40909	5	1	1	1	1	3	3	2.14286	3	3	2	3	3	2	2	2.57143	2.04113	3	2	3	3	3	3	3	4	4	11	17	28	3	2	3	3	3	3	3	4	4	11	17	28
1631	2021-12-30	Senior One	female	16	＜6h/d	High school and blow	Undergraduate	1.5	5	2	2	1	4	5	2	3	2	2	2	2	2	1	1	1.71429	2.07143	3	2	2	1	1	1	2	3	4	9	10	19	3	3	2	3	2	3	4	4	4	12	16	28
1632	2021-12-30	Senior One	male	16	6-8h/d	High school and blow	High school and blow	1.22727	4	1	2	1	1	3	1	1.85714	2	2	2	2	2	2	2	2	1.69481	3	1	2	2	3	2	3	3	3	9	13	22	3	2	2	2	3	2	3	3	3	9	14	23
1633	2021-12-30	Senior One	female	15	＜6h/d	High school and blow	High school and blow	1.18182	2	1	2	1	1	1	1	1.28571	1	1	1	1	1	1	1	1	1.15584	3	2	2	2	2	3	3	3	3	9	14	23	2	2	2	2	2	3	3	3	3	9	13	22
1634	2021-12-30	Senior One	male	15	8-10h/d	Undergraduate	High school and blow	1.59091	5	1	1	1	1	2	3	2	2	1	2	1	2	3	3	2	1.86364	3	2	2	1	4	3	3	3	3	9	15	24	4	4	4	4	1	1	2	2	3	7	18	25
1635	2021-12-30	Senior One	male	15	6-8h/d	Specialties	High school and blow	1.40909	3	2	2	1	1	3	2	2	1	2	1	2	1	2	2	1.57143	1.66017	3	3	3	3	2	2	2	2	3	7	16	23	3	3	3	3	2	2	2	2	3	7	16	23
1636	2021-12-30	Senior One	female	16	＜6h/d	High school and blow	High school and blow	1.31818	3	2	3	1	1	3	1	2	2	1	1	2	1	3	3	1.85714	1.72511	3	3	3	2	2	3	4	4	4	12	16	28	2	2	3	2	2	3	3	4	4	11	14	25
1637	2021-12-30	Senior One	male	15	＜6h/d	High school and blow	High school and blow	1.27273	5	5	5	3	3	3	1	3.57143	2	2	2	2	2	2	2	2	2.28139	3	3	3	3	3	2	3	4	4	11	17	28	3	3	3	2	2	3	2	4	4	10	16	26
1638	2021-12-30	Senior One	male	16	6-8h/d	Undergraduate	High school and blow	1.13636	5	1	1	1	1	2	2	1.85714	1	1	1	1	1	2	2	1.28571	1.42641	3	3	3	2	2	3	4	4	4	12	16	28	3	3	3	2	2	3	4	4	4	12	16	28
1639	2021-12-30	Senior One	male	16	＜6h/d	High school and blow	High school and blow	1.22727	2	1	1	1	1	3	1	1.42857	1	1	1	1	1	3	2	1.42857	1.36147	2	2	2	2	2	2	2	2	2	6	12	18	1	2	2	4	3	2	1	1	4	6	14	20
1640	2021-12-30	Senior One	male	15	6-8h/d	High school and blow	High school and blow	1.72727	4	1	1	1	3	5	2	2.42857	5	1	1	5	1	1	1	2.14286	2.09957	3	2	2	2	2	3	3	3	3	9	14	23	3	2	2	2	2	3	3	3	3	9	14	23
1641	2021-12-30	Senior One	male	15	6-8h/d	Specialties	Specialties	1.54545	4	2	3	4	3	5	5	3.71429	5	1	1	5	1	1	1	2.14286	2.46753	3	3	3	3	3	3	2	2	2	6	18	24	3	3	3	3	3	3	2	2	2	6	18	24
1642	2021-12-30	Senior One	male	16	＜6h/d	High school and blow	High school and blow	1.13636	3	1	1	1	1	3	2	1.71429	2	1	1	2	1	1	1	1.28571	1.37879	1	1	2	1	1	1	4	4	4	12	7	19	3	2	1	1	1	1	4	4	4	12	9	21
1643	2021-12-30	Senior One	female	16	＜6h/d	Undergraduate	Specialties	1.31818	5	1	1	2	1	1	1	1.71429	5	2	2	5	2	1	1	2.57143	1.86797	2	2	4	2	3	3	3	4	3	10	16	26	4	2	2	2	2	2	2	2	2	6	14	20
1644	2021-12-30	Senior One	male	15	6-8h/d	High school and blow	High school and blow	1.54545	4	1	1	2	1	4	3	2.28571	4	3	3	4	3	2	2	3	2.27706	3	2	2	2	2	2	3	3	3	9	13	22	3	2	2	2	2	2	3	3	3	9	13	22
1645	2021-12-30	Senior One	female	15	6-8h/d	Specialties	Specialties	1.40909	4	1	2	3	2	3	2	2.42857	2	2	2	2	2	3	3	2.28571	2.04113	2	3	2	3	3	3	4	4	4	12	16	28	3	4	4	3	3	3	4	4	4	12	20	32
1646	2021-12-30	Senior One	male	16	6-8h/d	High school and blow	High school and blow	1.13636	4	2	2	2	1	3	2	2.28571	3	3	3	3	3	4	4	3.28571	2.23593	2	2	2	2	2	2	3	3	3	9	12	21	2	2	2	2	2	2	3	3	3	9	12	21
1647	2021-12-30	Senior One	female	15	6-8h/d	Undergraduate	High school and blow	1.22727	3	1	3	1	2	3	2	2.14286	2	1	1	2	1	1	1	1.28571	1.55195	2	4	2	3	2	2	1	2	4	7	15	22	1	1	1	1	1	1	4	4	4	12	6	18
1648	2021-12-30	Senior One	male	15	＜6h/d	Postgraduate and above	Postgraduate and above	1.45455	4	2	2	3	3	3	3	2.85714	2	2	2	2	2	2	2	2	2.1039	3	3	3	3	3	3	2	3	3	8	18	26	3	3	3	3	3	3	2	4	4	10	18	28
1649	2021-12-30	Senior One	female	15	6-8h/d	High school and blow	High school and blow	1.22727	4	1	1	1	1	4	2	2	1	1	1	1	1	1	1	1	1.40909	2	2	2	2	2	3	3	3	3	9	13	22	2	2	2	2	2	2	3	3	2	8	12	20
1650	2021-12-30	Senior One	female	15	6-8h/d	Undergraduate	Undergraduate	1.18182	4	2	2	2	1	2	1	2	3	2	2	3	2	1	1	2	1.72727	4	4	4	4	4	2	3	3	3	9	22	31	4	4	4	4	4	2	3	3	3	9	22	31
1651	2021-12-30	Senior One	female	15	6-8h/d	Postgraduate and above	Undergraduate	1.5	4	1	2	1	3	5	4	2.85714	2	2	2	2	2	1	1	1.71429	2.02381	4	2	4	2	4	2	4	3	3	10	18	28	3	3	3	3	3	3	3	3	3	9	18	27
1652	2021-12-30	Senior One	male	16	6-8h/d	Undergraduate	Specialties	2.13636	5	3	4	3	3	3	2	3.28571	3	3	3	3	3	3	3	3	2.80736	3	3	3	3	3	2	3	3	3	9	17	26	3	3	3	3	3	2	3	3	3	9	17	26
1653	2021-12-30	Senior One	male	16	6-8h/d	High school and blow	High school and blow	1.95455	5	4	4	5	5	5	5	4.71429	5	5	5	5	5	5	5	5	3.88961	3	3	3	3	3	3	3	3	3	9	18	27	3	3	3	3	3	3	3	3	3	9	18	27
1654	2021-12-30	Senior One	male	17	＜6h/d	High school and blow	High school and blow	1.45455	5	2	2	3	2	2	2	2.57143	1	2	2	1	2	4	4	2.28571	2.1039	3	3	3	3	3	3	3	3	3	9	18	27	3	3	3	3	3	3	3	3	3	9	18	27
1655	2021-12-30	Senior One	male	17	＜6h/d	High school and blow	High school and blow	1.45455	1	3	4	3	3	3	2	2.71429	4	4	4	4	4	4	4	4	2.72294	3	3	3	3	3	3	3	3	3	9	18	27	3	3	3	3	3	3	3	3	3	9	18	27
1656	2021-12-30	Senior One	female	15	＜6h/d	Undergraduate	Specialties	1.27273	4	1	1	1	4	4	1	2.28571	1	1	1	1	1	1	1	1	1.51948	3	2	2	3	2	3	3	3	3	9	15	24	3	2	2	3	2	3	3	3	3	9	15	24
1657	2021-12-30	Senior One	male	15	＜6h/d	Specialties	Undergraduate	1.72727	3	1	3	2	3	4	1	2.42857	1	1	1	1	1	1	1	1	1.71861	4	4	4	2	4	4	2	3	1	6	22	28	4	4	4	2	4	3	2	3	1	6	21	27
1658	2021-12-30	Senior One	male	16	6-8h/d	Specialties	Specialties	1.04545	2	1	1	1	1	1	2	1.28571	1	1	1	1	2	1	1	1.14286	1.15801	3	3	3	3	3	3	3	3	3	9	18	27	3	3	3	3	3	3	3	3	3	9	18	27
1659	2021-12-30	Senior One	female	16	＜6h/d	Undergraduate	Undergraduate	1.13636	3	1	2	1	1	2	1	1.57143	2	1	1	1	1	1	2	1.28571	1.33117	2	2	3	2	2	2	3	3	3	9	13	22	2	2	2	2	2	2	3	3	3	9	12	21
1660	2021-12-30	Senior One	female	15	6-8h/d	Specialties	Specialties	1.36364	2	1	1	1	1	5	2	1.85714	1	1	1	1	1	3	3	1.57143	1.5974	3	4	2	3	3	3	1	1	3	5	18	23	3	4	2	3	3	3	1	1	3	5	18	23
1661	2021-12-30	Senior One	male	15	6-8h/d	Specialties	Specialties	1.13636	4	1	1	1	3	3	3	2.28571	2	2	2	2	2	2	2	2	1.80736	4	4	4	4	4	4	2	2	2	6	24	30	4	4	4	4	4	4	2	2	2	6	24	30
1662	2021-12-30	Senior One	male	16	6-8h/d	High school and blow	High school and blow	1.63636	4	3	4	1	1	3	3	2.71429	1	1	2	1	1	4	2	1.71429	2.02165	3	3	3	2	2	2	3	3	2	8	15	23	3	3	2	2	2	2	3	3	3	9	14	23
1663	2021-12-30	Senior One	female	15	6-8h/d	Specialties	Specialties	1.31818	4	1	5	1	1	4	4	2.85714	1	1	1	1	1	1	1	1	1.72511	4	4	4	4	4	4	1	1	1	3	24	27	4	4	4	4	4	4	1	1	1	3	24	27
1664	2021-12-30	Senior One	male	16	6-8h/d	High school and blow	High school and blow	1.31818	5	2	2	1	1	2	2	2.14286	4	4	4	4	4	1	1	3.14286	2.2013	4	4	4	4	4	4	1	1	1	3	24	27	4	4	4	4	4	4	1	1	1	3	24	27
1665	2021-12-30	Senior One	male	15	6-8h/d	Specialties	Specialties	1.04545	3	2	2	1	1	2	2	1.85714	2	2	2	2	1	1	2	1.71429	1.53896	1	1	1	1	1	1	4	4	4	12	6	18	1	1	1	1	1	1	4	4	4	12	6	18
1666	2021-12-30	Senior One	male	16	6-8h/d	Undergraduate	High school and blow	2.45455	5	5	5	5	5	5	5	5	5	5	5	5	5	5	5	5	4.15152	2	2	3	4	3	4	4	4	4	12	18	30	2	3	3	4	3	3	4	4	4	12	18	30
1667	2021-12-30	Senior One	male	16	8-10h/d	Undergraduate	Specialties	1.36364	3	5	2	3	1	3	2	2.71429	1	1	1	1	2	2	2	1.42857	1.8355	2	2	2	4	4	2	4	4	4	12	16	28	4	2	2	3	3	3	3	3	3	9	17	26
1668	2021-12-30	Senior One	male	15	＜6h/d	Undergraduate	Undergraduate	1.22727	4	2	2	1	1	1	1	1.71429	1	1	1	1	1	1	1	1	1.31385	3	3	3	2	2	2	4	4	4	12	15	27	3	3	3	2	2	2	4	4	4	12	15	27
1669	2021-12-30	Senior One	male	16	6-8h/d	High school and blow	High school and blow	1.31818	5	1	1	3	3	3	3	2.71429	3	3	3	3	3	3	3	3	2.34416	3	3	3	3	2	3	3	3	3	9	17	26	3	3	3	3	3	3	3	3	3	9	18	27
1670	2021-12-30	Senior One	female	15	6-8h/d	High school and blow	Undergraduate	1.63636	5	1	2	1	2	2	2	2.14286	2	2	2	2	2	4	2	2.28571	2.02165	3	4	4	4	3	3	2	2	2	6	21	27	3	3	3	3	3	3	3	3	3	9	18	27
1671	2021-12-30	Senior One	female	16	6-8h/d	Undergraduate	Specialties	1.13636	3	1	1	1	1	1	1	1.28571	1	1	1	1	1	1	1	1	1.14069	4	2	3	2	2	3	4	4	4	12	16	28	4	2	4	2	2	2	4	4	4	12	16	28
1672	2021-12-30	Senior One	male	16	6-8h/d	Specialties	Specialties	1.13636	3	2	3	2	2	3	2	2.42857	2	1	2	1	1	3	4	2	1.85498	1	1	1	1	3	1	3	3	3	9	8	17	1	1	1	1	3	1	3	3	3	9	8	17
1673	2021-12-30	Senior One	female	15	6-8h/d	High school and blow	High school and blow	1.68182	5	3	2	2	1	4	4	3	5	5	5	5	5	2	2	4.14286	2.94156	3	4	4	3	2	3	4	4	3	11	19	30	4	4	4	3	2	2	4	4	4	12	19	31
1674	2021-12-30	Senior One	female	15	6-8h/d	High school and blow	High school and blow	1.45455	5	1	1	1	1	5	2	2.28571	1	1	1	1	1	2	1	1.14286	1.62771	4	4	3	4	3	3	1	1	1	3	21	24	3	3	3	3	3	3	2	2	2	6	18	24
1675	2021-12-30	Senior One	female	16	6-8h/d	Specialties	Specialties	1.18182	2	1	2	1	1	1	1	1.28571	1	1	1	1	1	2	2	1.28571	1.25108	2	1	1	2	1	1	1	1	1	3	8	11	4	3	3	3	1	1	1	1	1	3	15	18
1676	2021-12-30	Senior One	female	17	6-8h/d	Specialties	Specialties	1.36364	2	1	1	1	1	1	2	1.28571	1	1	1	1	1	1	1	1	1.21645	2	2	2	2	2	2	3	3	3	9	12	21	2	2	2	2	2	2	3	3	3	9	12	21
1677	2021-12-30	Senior One	male	15	6-8h/d	High school and blow	High school and blow	1.27273	3	1	1	1	1	1	2	1.42857	1	1	2	1	1	1	1	1.14286	1.28139	1	1	4	1	1	1	4	4	4	12	9	21	1	1	4	1	1	1	4	4	4	12	9	21
1678	2021-12-30	Senior One	male	15	6-8h/d	High school and blow	High school and blow	1.09091	2	1	1	2	1	2	1	1.42857	1	1	1	1	1	2	2	1.28571	1.2684	3	2	2	2	2	2	2	2	2	6	13	19	3	2	2	2	2	2	3	3	2	8	13	21
1679	2021-12-30	Senior One	female	15	＜6h/d	Specialties	Specialties	1	4	1	1	1	1	1	1	1.42857	1	1	1	1	1	2	2	1.28571	1.2381	3	2	1	1	1	1	4	4	4	12	9	21	3	2	2	2	1	1	3	3	3	9	11	20
1680	2021-12-30	Senior One	female	15	6-8h/d	Specialties	Specialties	1.36364	4	1	2	1	1	2	2	1.85714	3	3	3	3	3	2	2	2.71429	1.97835	4	3	3	3	2	3	3	3	3	9	18	27	2	2	2	2	2	2	3	3	3	9	12	21
1681	2021-12-30	Senior One	male	15	6-8h/d	Undergraduate	Undergraduate	1.22727	3	1	2	1	2	2	3	2	1	1	1	1	1	3	3	1.57143	1.59957	2	2	3	2	2	2	3	3	3	9	13	22	1	2	2	2	2	2	3	4	4	11	11	22
1682	2021-12-30	Senior One	female	16	6-8h/d	High school and blow	High school and blow	1.18182	2	1	1	1	1	1	1	1.14286	1	1	1	1	1	2	2	1.28571	1.20346	3	3	3	1	3	2	4	4	4	12	15	27	4	1	1	1	4	1	3	3	3	9	12	21
1683	2021-12-30	Senior One	female	15	6-8h/d	High school and blow	Specialties	1.5	4	2	2	1	1	5	2	2.42857	1	1	1	1	1	1	1	1	1.64286	3	3	3	2	1	3	3	3	4	10	15	25	1	1	1	2	1	1	4	4	4	12	7	19
1684	2021-12-30	Senior One	female	15	6-8h/d	Undergraduate	Undergraduate	1.5	4	2	2	1	1	5	2	2.42857	1	1	1	1	1	2	2	1.28571	1.7381	3	3	3	2	3	2	2	3	2	7	16	23	2	2	2	3	2	2	2	2	2	6	13	19
1685	2021-12-30	Senior One	male	15	6-8h/d	High school and blow	Specialties	1.68182	5	1	1	3	4	3	3	2.85714	3	3	3	3	3	3	3	3	2.51299	3	3	3	2	2	2	3	3	3	9	15	24	3	3	3	2	2	2	3	3	3	9	15	24
1686	2021-12-30	Senior Two	male	17	6-8h/d	Postgraduate and above	Postgraduate and above	2.22727	2	2	2	3	3	3	4	2.71429	5	5	5	5	5	5	5	5	3.31385	1	2	2	3	3	3	2	2	2	6	14	20	4	4	4	4	4	4	1	1	1	3	24	27
1687	2021-12-30	Senior Two	female	17	6-8h/d	Undergraduate	High school and blow	1.27273	3	2	2	1	1	1	2	1.71429	3	1	3	1	1	3	3	2.14286	1.70996	3	3	3	3	2	2	3	3	3	9	16	25	3	3	3	3	2	2	3	3	3	9	16	25
1688	2021-12-30	Senior Two	female	16	＜6h/d	Specialties	Specialties	1.31818	3	1	1	1	1	5	1	1.85714	2	2	2	2	2	1	1	1.71429	1.62987	3	2	2	2	2	3	3	3	3	9	14	23	3	3	3	2	2	3	3	3	3	9	16	25
1689	2021-12-30	Senior Two	female	16	6-8h/d	High school and blow	High school and blow	1.18182	4	1	1	1	1	4	2	2	4	1	4	1	1	1	1	1.85714	1.67965	3	3	3	3	2	3	3	3	3	9	17	26	3	3	3	3	3	3	3	3	3	9	18	27
1690	2021-12-30	Senior Two	female	16	6-8h/d	Undergraduate	Specialties	1.59091	3	3	3	1	1	4	3	2.57143	2	2	2	2	2	2	2	2	2.05411	3	3	3	3	3	3	2	2	2	6	18	24	3	3	3	3	3	3	2	2	2	6	18	24
1691	2021-12-30	Senior Two	female	16	6-8h/d	Specialties	Specialties	1.31818	3	1	3	1	1	1	1	1.57143	2	1	2	1	1	1	1	1.28571	1.39177	1	1	1	1	1	1	4	4	4	12	6	18	1	1	1	3	1	1	4	4	4	12	8	20
1692	2021-12-30	Senior Two	male	17	6-8h/d	High school and blow	High school and blow	1	2	1	1	1	1	4	1	1.57143	1	1	1	1	1	1	1	1	1.19048	1	1	1	1	1	1	4	4	4	12	6	18	1	1	1	1	1	1	4	4	4	12	6	18
1693	2021-12-30	Senior Two	male	16	＜6h/d	Specialties	Specialties	1.27273	4	2	1	1	3	3	2	2.28571	1	2	2	1	1	2	1	1.42857	1.66234	3	2	2	3	3	1	2	1	1	4	14	18	3	3	2	3	3	3	2	2	2	6	17	23
1694	2021-12-30	Senior Two	male	16	＜6h/d	Postgraduate and above	Postgraduate and above	1.18182	5	5	5	2	2	1	2	3.14286	4	4	4	4	3	4	4	3.85714	2.72727	1	1	4	4	4	4	1	1	1	3	18	21	4	4	4	4	4	4	1	1	1	3	24	27
1695	2021-12-30	Senior Two	male	16	＜6h/d	Undergraduate	Undergraduate	1.13636	5	5	5	5	1	1	3	3.57143	4	4	4	4	4	4	4	4	2.9026	1	1	4	4	4	4	1	1	1	3	18	21	4	4	4	4	4	4	1	1	1	3	24	27
1696	2021-12-30	Senior Two	male	17	＜6h/d	Undergraduate	Undergraduate	1.13636	2	2	2	1	1	2	1	1.57143	3	1	3	1	1	1	1	1.57143	1.42641	3	3	3	2	2	2	4	4	4	12	15	27	2	3	3	3	2	2	4	4	4	12	15	27
1697	2021-12-30	Senior Two	male	16	＜6h/d	High school and blow	High school and blow	1.04545	2	1	1	1	1	1	1	1.14286	2	1	1	1	1	1	1	1.14286	1.11039	3	3	3	3	3	3	2	2	2	6	18	24	3	3	3	3	3	3	2	2	2	6	18	24
1698	2021-12-30	Senior Two	female	16	6-8h/d	Undergraduate	Undergraduate	1.36364	3	2	1	3	3	3	3	2.57143	2	3	2	2	3	2	3	2.42857	2.12121	3	3	3	3	3	3	2	2	2	6	18	24	3	3	3	3	3	3	2	2	2	6	18	24
1699	2021-12-30	Senior Two	female	17	＜6h/d	Undergraduate	Undergraduate	1.22727	2	1	1	1	1	1	1	1.14286	1	1	1	1	1	1	1	1	1.12338	3	2	1	3	2	4	4	4	4	12	15	27	3	2	1	1	1	2	4	4	4	12	10	22
1700	2021-12-30	Senior Two	female	17	＜6h/d	High school and blow	High school and blow	1.45455	3	1	2	2	2	4	3	2.42857	3	2	3	2	2	3	3	2.57143	2.15152	3	3	3	3	3	3	3	3	3	9	18	27	3	3	3	3	3	3	3	3	3	9	18	27
1701	2021-12-30	Senior Two	male	16	6-8h/d	High school and blow	High school and blow	1.27273	5	1	1	3	1	4	2	2.42857	2	2	2	2	2	3	3	2.28571	1.99567	3	3	2	2	2	3	3	4	4	11	15	26	3	2	2	2	2	2	3	4	4	11	13	24
1702	2021-12-30	Senior Two	male	17	＜6h/d	Postgraduate and above	High school and blow	1.59091	4	1	1	2	2	2	2	2	2	2	2	2	2	2	2	2	1.86364	4	4	4	4	4	4	3	3	3	9	24	33	4	4	4	4	4	4	3	3	3	9	24	33
1703	2021-12-30	Senior Two	male	17	6-8h/d	High school and blow	High school and blow	1.86364	3	3	3	3	3	4	3	3.14286	2	2	2	2	2	2	2	2	2.3355	3	3	3	3	3	3	2	2	2	6	18	24	3	3	3	3	3	3	2	2	2	6	18	24
1704	2021-12-30	Senior Two	male	17	＜6h/d	Specialties	Specialties	1.36364	5	1	2	2	3	5	4	3.14286	5	5	5	5	5	5	1	4.42857	2.97835	3	3	3	3	3	3	2	2	2	6	18	24	3	3	3	3	3	3	2	2	2	6	18	24
1705	2021-12-30	Senior Two	male	17	8-10h/d	Undergraduate	Undergraduate	1.45455	3	2	2	1	1	2	1	1.71429	2	1	2	1	1	1	1	1.28571	1.48485	3	3	3	3	3	3	2	2	2	6	18	24	3	3	3	3	3	3	2	2	2	6	18	24
1706	2021-12-30	Senior Two	male	17	6-8h/d	High school and blow	High school and blow	1.27273	3	2	1	2	1	3	2	2	2	1	2	1	1	4	3	2	1.75758	1	1	1	1	1	1	4	4	4	12	6	18	1	1	1	1	1	1	4	4	4	12	6	18
1707	2021-12-30	Senior Two	female	16	＜6h/d	High school and blow	High school and blow	1.27273	3	1	2	1	1	1	1	1.42857	1	1	2	1	1	1	1	1.14286	1.28139	4	3	3	4	4	2	4	3	3	10	20	30	4	3	3	4	3	1	3	3	3	9	18	27
1708	2021-12-30	Senior Two	male	16	6-8h/d	Undergraduate	High school and blow	1.27273	4	2	2	4	4	4	3	3.28571	3	3	3	2	3	3	3	2.85714	2.47186	3	3	3	3	3	3	2	2	2	6	18	24	3	3	3	3	3	3	2	2	2	6	18	24
1709	2021-12-30	Senior Two	female	16	6-8h/d	Undergraduate	Undergraduate	1.18182	5	1	1	1	1	2	3	2	2	2	2	2	2	2	2	2	1.72727	3	3	3	3	3	3	2	2	2	6	18	24	3	3	3	3	3	3	2	2	2	6	18	24
1710	2021-12-30	Senior Two	male	16	6-8h/d	Specialties	Undergraduate	1.13636	4	2	2	2	1	3	2	2.28571	3	1	3	1	1	1	2	1.71429	1.71212	1	1	1	1	1	1	2	2	4	8	6	14	1	1	1	1	1	1	2	4	4	10	6	16
1711	2021-12-30	Senior Two	female	16	8-10h/d	High school and blow	High school and blow	1.09091	3	1	1	2	2	2	1	1.71429	2	1	2	1	1	1	2	1.42857	1.41126	2	2	2	2	2	2	1	1	1	3	12	15	3	3	3	3	1	1	2	1	1	4	14	18
1712	2021-12-30	Senior Two	female	17	＜6h/d	Undergraduate	Undergraduate	1	3	1	2	1	2	2	2	1.85714	1	2	2	1	2	2	2	1.71429	1.52381	3	3	3	2	3	3	2	2	2	6	17	23	3	3	3	2	3	3	2	2	2	6	17	23
1713	2021-12-30	Senior Two	female	16	6-8h/d	Undergraduate	Undergraduate	1.45455	4	1	2	1	3	3	2	2.28571	1	1	1	1	1	2	2	1.28571	1.67532	3	3	3	3	3	3	2	2	2	6	18	24	3	3	3	3	3	3	2	2	2	6	18	24
1714	2021-12-30	Senior Two	male	16	＜6h/d	Specialties	High school and blow	1.04545	2	1	1	1	1	1	1	1.14286	1	1	1	2	1	1	1	1.14286	1.11039	3	3	3	3	3	3	2	2	2	6	18	24	3	3	3	3	3	3	2	2	2	6	18	24
1715	2021-12-30	Senior Two	female	17	6-8h/d	High school and blow	High school and blow	1.59091	5	4	3	2	1	3	3	3	4	1	4	1	1	4	4	2.71429	2.43506	3	3	3	3	3	3	2	2	2	6	18	24	3	3	3	3	3	3	2	2	2	6	18	24
1716	2021-12-30	Senior Two	female	17	＜6h/d	Undergraduate	Undergraduate	2	4	1	3	1	2	3	2	2.28571	1	1	1	1	1	2	2	1.28571	1.85714	4	4	4	4	4	4	3	3	3	9	24	33	4	4	4	4	4	4	3	3	3	9	24	33
1717	2021-12-30	Senior Two	female	16	6-8h/d	High school and blow	High school and blow	1.40909	3	2	2	1	1	2	1	1.71429	1	2	3	2	1	3	3	2.14286	1.75541	4	4	4	3	4	2	3	3	3	9	21	30	3	3	3	4	4	2	3	3	3	9	19	28
1718	2021-12-30	Senior Two	female	16	＜6h/d	High school and blow	High school and blow	1.31818	3	1	1	1	1	1	2	1.42857	3	3	3	3	3	1	1	2.42857	1.72511	3	3	2	3	2	3	4	4	4	12	16	28	3	3	3	2	3	2	3	3	3	9	16	25
1719	2021-12-30	Senior Two	male	16	6-8h/d	Undergraduate	Specialties	1.22727	2	1	4	2	1	3	1	2	2	2	2	2	2	3	3	2.28571	1.83766	3	3	3	2	2	3	3	3	3	9	16	25	3	3	3	2	2	3	3	3	3	9	16	25
1720	2021-12-30	Senior Two	female	17	8-10h/d	Undergraduate	Undergraduate	1.13636	2	1	4	2	1	3	1	2	2	2	2	2	2	3	3	2.28571	1.80736	2	2	2	1	1	2	4	4	4	12	10	22	2	2	2	1	1	2	4	4	4	12	10	22
1721	2021-12-30	Senior Two	male	17	6-8h/d	High school and blow	High school and blow	1.40909	2	2	2	3	3	3	2	2.42857	2	2	2	2	2	2	2	2	1.94589	3	3	3	3	3	3	4	4	4	12	18	30	3	3	3	3	3	3	4	4	4	12	18	30
1722	2021-12-30	Senior Two	male	17	6-8h/d	High school and blow	High school and blow	1	3	3	2	3	3	3	3	2.85714	2	2	1	2	2	2	2	1.85714	1.90476	4	4	4	4	4	4	1	1	1	3	24	27	4	4	4	4	4	4	1	1	1	3	24	27
1723	2021-12-30	Senior Two	female	17	6-8h/d	High school and blow	High school and blow	1.04545	3	2	2	1	1	1	2	1.71429	2	2	2	2	2	2	2	2	1.58658	3	3	3	3	3	3	3	3	3	9	18	27	3	3	3	3	3	3	3	3	3	9	18	27
1724	2021-12-30	Senior Two	male	16	6-8h/d	Specialties	Specialties	1.04545	3	2	2	1	1	1	2	1.71429	1	1	1	1	1	2	2	1.28571	1.34848	3	3	3	3	3	3	2	2	2	6	18	24	3	3	3	3	3	3	2	2	2	6	18	24
1725	2021-12-30	Senior Two	male	16	8-10h/d	Specialties	Specialties	1.04545	5	2	3	4	3	2	1	2.85714	1	1	1	1	1	2	2	1.28571	1.72944	3	3	3	3	3	3	2	2	2	6	18	24	3	3	3	3	3	3	2	2	2	6	18	24
1726	2021-12-30	Senior Two	female	17	6-8h/d	Undergraduate	Postgraduate and above	1.36364	5	2	2	3	3	3	3	3	1	1	1	1	1	2	2	1.28571	1.88312	3	4	4	4	4	4	3	3	3	9	23	32	3	3	4	4	4	3	3	3	3	9	21	30
1727	2021-12-30	Senior Two	male	17	6-8h/d	Specialties	Specialties	1.04545	2	2	2	1	1	1	1	1.42857	2	2	2	1	2	2	2	1.85714	1.44372	4	3	3	3	2	3	4	4	4	12	18	30	4	3	3	3	3	3	4	4	4	12	19	31
1728	2021-12-30	Senior Two	female	16	6-8h/d	Specialties	Specialties	1.18182	5	2	2	1	1	1	1	1.85714	2	2	2	2	1	2	2	1.85714	1.63203	3	1	1	1	1	1	4	4	4	12	8	20	4	1	1	1	1	1	4	4	4	12	9	21
1729	2021-12-30	Senior Two	male	16	＜6h/d	High school and blow	High school and blow	1.27273	5	1	1	2	2	3	1	2.14286	2	2	2	2	2	1	1	1.71429	1.70996	2	2	2	2	2	2	3	3	3	9	12	21	2	2	2	2	2	2	3	3	3	9	12	21
1730	2021-12-30	Senior Two	male	16	＜6h/d	High school and blow	High school and blow	1.31818	3	2	2	1	1	1	1	1.57143	3	3	2	3	3	3	3	2.85714	1.91558	3	3	3	3	2	2	2	3	2	7	16	23	2	3	3	2	2	2	3	3	3	9	14	23
1731	2021-12-30	Senior Two	male	16	＜6h/d	Specialties	Specialties	1.13636	3	1	1	2	1	2	2	1.71429	2	2	1	1	1	1	1	1.28571	1.37879	3	3	3	3	3	3	3	3	3	9	18	27	3	3	3	3	3	3	3	3	3	9	18	27
1732	2021-12-30	Senior Two	female	16	6-8h/d	Specialties	Specialties	1.13636	2	2	2	2	1	2	2	1.85714	1	1	1	2	2	1	1	1.28571	1.42641	3	3	3	3	3	3	3	3	3	9	18	27	3	3	3	3	3	3	3	3	3	9	18	27
1733	2021-12-30	Senior Two	male	17	＜6h/d	High school and blow	High school and blow	1.40909	3	2	2	1	1	1	1	1.57143	1	1	1	1	1	1	2	1.14286	1.37446	2	2	2	2	2	3	2	2	3	7	13	20	2	2	2	2	2	3	2	2	2	6	13	19
1734	2021-12-30	Senior Two	male	17	6-8h/d	Specialties	Specialties	1.09091	4	1	1	1	4	3	2	2.28571	1	2	2	2	2	1	1	1.57143	1.64935	3	3	3	3	3	3	2	2	2	6	18	24	3	3	3	3	3	3	2	2	2	6	18	24
1735	2021-12-30	Senior Two	female	16	6-8h/d	High school and blow	High school and blow	1.09091	4	2	2	1	1	3	2	2.14286	3	1	1	1	2	1	1	1.42857	1.55411	3	3	3	3	3	3	3	3	3	9	18	27	3	3	3	3	3	3	3	3	3	9	18	27
1736	2021-12-30	Senior Two	male	16	6-8h/d	High school and blow	High school and blow	1.04545	3	1	2	1	1	1	2	1.57143	2	2	2	2	2	1	1	1.71429	1.44372	2	2	2	2	2	2	3	3	3	9	12	21	2	2	2	2	2	2	3	3	3	9	12	21
1737	2021-12-30	Senior Two	male	16	＜6h/d	High school and blow	High school and blow	1.22727	3	1	1	1	1	1	1	1.28571	1	1	1	2	1	1	1	1.14286	1.21861	2	2	2	1	1	1	2	2	2	6	9	15	3	3	3	3	2	1	2	2	2	6	15	21
1738	2021-12-30	Senior Two	male	16	＜6h/d	Undergraduate	Undergraduate	1.18182	2	4	4	3	5	5	3	3.71429	5	5	5	5	4	5	5	4.85714	3.25108	4	4	4	4	4	4	2	2	2	6	24	30	1	1	1	1	1	1	3	3	3	9	6	15
1739	2021-12-30	Senior Two	male	17	6-8h/d	High school and blow	High school and blow	1.18182	3	1	1	1	1	1	2	1.42857	1	1	1	3	1	1	1	1.28571	1.2987	1	1	1	1	1	1	4	4	4	12	6	18	1	1	1	1	1	1	4	4	4	12	6	18
1740	2021-12-30	Senior Two	female	17	6-8h/d	Specialties	High school and blow	1.72727	3	2	3	5	3	5	5	3.71429	3	2	3	3	2	3	3	2.71429	2.71861	3	4	4	4	4	4	3	3	4	10	23	33	4	4	4	4	4	4	3	4	3	10	24	34
1741	2021-12-30	Senior Two	male	16	8-10h/d	Specialties	Specialties	1.81818	1	5	5	1	1	1	1	2.14286	1	2	1	2	1	1	1	1.28571	1.74892	3	3	3	3	3	3	2	2	2	6	18	24	3	3	3	3	3	3	2	2	2	6	18	24
1742	2021-12-30	Senior Two	male	17	6-8h/d	Undergraduate	Undergraduate	1.40909	5	2	1	1	1	1	1	1.71429	1	1	1	2	1	1	1	1.14286	1.42208	3	3	3	3	3	3	4	4	4	12	18	30	1	3	3	1	1	1	4	4	4	12	10	22
1743	2021-12-30	Senior Two	male	17	6-8h/d	High school and blow	Specialties	1.40909	2	2	1	3	1	3	1	1.85714	2	2	2	2	2	2	1	1.85714	1.70779	3	3	3	3	3	3	2	2	2	6	18	24	3	3	3	3	3	3	2	2	2	6	18	24
1744	2021-12-30	Senior Two	female	17	6-8h/d	High school and blow	High school and blow	1.09091	1	2	2	1	1	2	1	1.42857	2	4	2	2	2	2	2	2.28571	1.60173	3	3	3	3	3	3	2	2	2	6	18	24	3	3	3	3	3	3	2	2	2	6	18	24
1745	2021-12-30	Senior Two	male	17	＜6h/d	High school and blow	Specialties	1.5	5	4	1	4	5	4	5	4	3	4	4	4	4	3	3	3.57143	3.02381	3	2	2	2	2	2	2	2	3	7	13	20	3	3	3	3	3	3	3	3	3	9	18	27
1746	2021-12-30	Senior Two	female	17	＜6h/d	Specialties	High school and blow	1.36364	3	1	1	2	1	3	2	1.85714	2	4	2	4	2	1	1	2.28571	1.8355	3	3	3	3	3	3	2	2	2	6	18	24	3	3	3	3	3	3	2	2	2	6	18	24
1747	2021-12-30	Senior Two	female	16	＜6h/d	High school and blow	High school and blow	1.09091	2	2	2	1	1	1	1	1.42857	1	1	1	1	1	1	1	1	1.17316	3	3	3	3	3	2	3	3	3	9	17	26	3	3	3	3	3	2	3	3	3	9	17	26
1748	2021-12-30	Senior Two	female	16	6-8h/d	Undergraduate	Specialties	1.31818	4	1	2	1	2	2	1	1.85714	1	1	1	1	1	2	2	1.28571	1.48701	4	4	4	4	4	2	4	4	4	12	22	34	4	4	4	4	4	2	4	4	4	12	22	34
1749	2021-12-30	Senior Two	female	18	＜6h/d	Specialties	Undergraduate	1.5	4	1	2	1	3	1	2	2	1	1	1	1	1	2	2	1.28571	1.59524	3	4	4	4	4	2	4	4	4	12	21	33	4	4	4	4	4	2	4	4	4	12	22	34
1750	2021-12-30	Senior Two	female	16	＜6h/d	High school and blow	High school and blow	1.31818	4	1	1	2	3	4	3	2.57143	1	1	3	3	3	3	3	2.42857	2.10606	3	3	3	3	3	3	3	3	2	8	18	26	4	4	4	4	4	4	3	3	2	8	24	32
1751	2021-12-30	Senior Two	female	17	＜6h/d	High school and blow	High school and blow	1.18182	4	5	1	1	1	5	1	2.57143	1	2	1	1	1	1	1	1.14286	1.63203	4	2	2	2	2	2	2	3	3	8	14	22	2	2	2	2	2	2	3	3	3	9	12	21
1752	2021-12-30	Senior Two	female	16	6-8h/d	High school and blow	High school and blow	1.09091	4	1	1	1	1	1	1	1.42857	1	1	1	1	1	1	1	1	1.17316	1	1	1	1	1	1	4	4	4	12	6	18	1	1	1	1	1	1	4	4	4	12	6	18
1753	2021-12-30	Senior Two	female	16	＜6h/d	Undergraduate	Undergraduate	1.18182	3	1	2	1	1	3	2	1.85714	1	1	1	1	1	1	1	1	1.34632	4	4	4	4	4	4	1	1	1	3	24	27	4	4	4	2	4	1	2	3	3	8	19	27
1754	2021-12-30	Senior Two	female	16	＜6h/d	Specialties	Undergraduate	1.18182	3	1	1	1	1	1	2	1.42857	1	1	1	1	1	1	1	1	1.20346	3	2	3	2	2	2	3	3	3	9	14	23	1	1	1	1	1	1	4	4	4	12	6	18
1755	2021-12-30	Senior Two	male	17	＜6h/d	Specialties	Specialties	1.36364	3	2	2	1	5	4	5	3.14286	2	2	2	2	2	5	5	2.85714	2.45455	2	3	2	3	3	3	3	3	3	9	16	25	1	1	1	1	1	1	4	4	4	12	6	18
1756	2021-12-30	Senior Two	female	16	6-8h/d	Specialties	High school and blow	1.13636	4	1	2	1	1	1	1	1.57143	1	1	1	1	1	1	1	1	1.23593	2	4	3	3	2	2	3	3	3	9	16	25	3	2	4	2	2	2	3	3	3	9	15	24
1757	2021-12-30	Senior Two	female	16	＜6h/d	Undergraduate	Specialties	1.36364	2	1	2	1	1	1	1	1.28571	3	3	3	2	3	3	3	2.85714	1.8355	3	2	3	2	3	3	1	1	2	4	16	20	3	2	2	2	2	3	1	1	2	4	14	18
1758	2021-12-30	Senior Two	male	17	6-8h/d	Undergraduate	Specialties	3.45455	3	2	2	1	1	1	2	1.71429	3	3	3	3	2	2	2	2.57143	2.58009	2	2	3	3	3	2	2	2	3	7	15	22	2	2	2	2	2	2	3	3	3	9	12	21
1759	2021-12-30	Senior Two	female	16	＜6h/d	Undergraduate	Specialties	1.40909	4	1	2	1	1	5	2	2.28571	1	1	1	1	1	2	2	1.28571	1.66017	2	3	3	2	3	2	3	3	3	9	15	24	2	3	3	3	3	2	3	3	3	9	16	25
1760	2021-12-30	Senior Two	female	16	6-8h/d	Specialties	High school and blow	1.27273	4	3	2	3	3	3	2	2.85714	2	1	2	3	2	1	3	2	2.04329	3	3	3	3	3	3	3	3	3	9	18	27	3	3	3	3	2	3	3	3	3	9	17	26
1761	2021-12-30	Senior Two	male	17	＜6h/d	High school and blow	High school and blow	1.18182	4	3	2	3	3	3	2	2.85714	2	2	2	2	2	3	2	2.14286	2.06061	3	3	3	3	3	3	3	3	3	9	18	27	3	3	3	3	3	2	3	3	3	9	17	26
1762	2021-12-30	Senior Two	female	17	6-8h/d	Specialties	Postgraduate and above	1.40909	4	1	2	1	1	2	3	2	3	2	2	2	2	2	3	2.28571	1.89827	2	2	2	2	2	2	3	3	3	9	12	21	4	4	4	2	2	2	3	3	3	9	18	27
1763	2021-12-30	Senior Two	male	16	6-8h/d	High school and blow	High school and blow	1.04545	5	4	4	4	4	4	3	4	3	3	3	3	3	2	3	2.85714	2.6342	3	3	3	3	3	3	2	2	2	6	18	24	3	3	3	3	3	3	2	2	2	6	18	24
1764	2021-12-30	Senior Two	male	16	6-8h/d	High school and blow	High school and blow	1.36364	4	1	2	1	1	3	3	2.14286	2	3	2	4	3	3	3	2.85714	2.12121	2	2	3	3	3	3	3	3	3	9	16	25	2	2	3	3	3	3	3	3	3	9	16	25
1765	2021-12-30	Senior Two	male	17	＜6h/d	High school and blow	High school and blow	1.04545	4	1	1	1	1	1	2	1.57143	1	2	1	1	1	1	1	1.14286	1.25325	4	4	4	4	4	4	1	1	1	3	24	27	2	2	2	2	2	2	3	3	3	9	12	21
1766	2021-12-30	Senior Two	male	17	6-8h/d	High school and blow	High school and blow	1.27273	5	3	3	1	1	3	2	2.57143	1	1	1	1	1	3	3	1.57143	1.80519	3	3	3	2	2	2	1	1	1	3	15	18	3	3	3	2	2	2	1	1	1	3	15	18
1767	2021-12-30	Senior Two	female	17	＜6h/d	High school and blow	High school and blow	1.54545	1	2	1	2	4	4	2	2.28571	3	1	1	1	4	3	1	2	1.94372	2	2	3	3	3	3	3	3	3	9	16	25	2	2	3	3	3	3	3	3	3	9	16	25
1768	2021-12-30	Senior Two	female	16	＜6h/d	High school and blow	Specialties	2	5	1	3	1	1	3	2	2.28571	4	4	4	3	4	4	4	3.85714	2.71429	3	3	3	3	3	3	2	2	2	6	18	24	3	3	3	3	3	3	2	2	2	6	18	24
1769	2021-12-30	Senior Two	male	16	＜6h/d	High school and blow	Specialties	2	5	1	3	1	5	4	1	2.85714	4	4	4	1	4	4	4	3.57143	2.80952	3	3	3	3	3	3	2	2	2	6	18	24	3	3	3	3	3	3	2	2	2	6	18	24
1770	2021-12-30	Senior Two	male	17	6-8h/d	Specialties	Specialties	1.81818	5	1	4	5	5	5	4	4.14286	4	4	4	4	3	4	4	3.85714	3.27273	3	3	3	3	3	3	2	2	2	6	18	24	3	3	3	3	3	3	2	3	3	8	18	26
1771	2021-12-30	Senior Two	male	17	6-8h/d	Postgraduate and above	Undergraduate	1.18182	3	2	1	1	1	1	3	1.71429	1	1	1	1	3	1	1	1.28571	1.39394	3	3	3	3	3	3	2	3	3	8	18	26	3	3	3	3	3	3	2	3	3	8	18	26
1772	2021-12-30	Senior Two	female	16	＜6h/d	Undergraduate	High school and blow	1.09091	3	1	2	1	1	2	1	1.57143	3	3	1	3	3	3	3	2.71429	1.79221	3	3	3	3	3	3	2	2	2	6	18	24	3	3	3	3	3	3	3	3	3	9	18	27
1773	2021-12-30	Senior Two	female	16	＜6h/d	High school and blow	High school and blow	1.27273	3	1	2	1	1	2	1	1.57143	3	3	3	3	3	2	2	2.71429	1.85281	3	2	3	2	2	2	3	3	3	9	14	23	3	2	2	2	2	2	3	3	3	9	13	22
1774	2021-12-30	Senior Two	male	16	6-8h/d	Specialties	Specialties	2.31818	1	1	1	2	3	4	2	2	1	1	1	2	3	3	3	2	2.10606	1	1	1	2	2	1	3	4	3	10	8	18	1	1	1	1	1	1	3	4	4	11	6	17
1775	2021-12-30	Senior Two	female	16	6-8h/d	Specialties	High school and blow	1.5	4	1	2	2	1	5	3	2.57143	4	2	2	2	4	3	2	2.71429	2.2619	3	3	2	3	3	2	2	2	2	6	16	22	2	2	2	3	3	2	2	2	2	6	14	20
1776	2021-12-30	Senior Two	male	17	＜6h/d	Undergraduate	Undergraduate	1.13636	5	1	1	1	1	5	4	2.57143	1	1	1	2	1	5	5	2.28571	1.99784	4	4	3	3	1	4	1	1	1	3	19	22	4	4	3	1	1	1	1	1	1	3	14	17
1777	2021-12-30	Senior Two	female	17	＜6h/d	High school and blow	High school and blow	1.40909	5	3	4	1	2	3	3	3	2	3	3	3	2	3	3	2.71429	2.37446	3	2	2	3	3	2	4	4	4	12	15	27	2	3	2	3	3	2	3	3	3	9	15	24
1778	2021-12-30	Senior Two	male	17	＜6h/d	High school and blow	Undergraduate	1.68182	5	1	1	2	1	3	2	2.14286	5	2	2	2	5	3	3	3.14286	2.32251	3	2	3	2	2	2	3	3	3	9	14	23	1	1	1	3	3	1	4	4	4	12	10	22
1779	2021-12-30	Senior Two	female	17	＜6h/d	High school and blow	High school and blow	2.22727	4	1	2	2	1	3	2	2.14286	2	3	2	4	3	2	3	2.71429	2.36147	3	3	3	3	2	3	3	2	3	8	17	25	3	3	3	3	2	3	3	2	3	8	17	25
1780	2021-12-30	Senior Two	female	16	6-8h/d	Undergraduate	Undergraduate	1.68182	4	1	4	5	1	4	3	3.14286	2	2	3	3	4	2	2	2.57143	2.46537	3	3	3	2	4	2	4	4	4	12	17	29	3	4	3	2	4	2	4	4	4	12	18	30
1781	2021-12-30	Senior Two	female	16	6-8h/d	High school and blow	High school and blow	1.5	5	1	2	1	3	3	3	2.57143	4	1	2	1	4	2	1	2.14286	2.07143	3	3	2	2	2	2	2	2	3	7	14	21	3	3	2	2	2	2	2	2	3	7	14	21
1782	2021-12-30	Senior Two	male	16	＜6h/d	High school and blow	High school and blow	1.54545	5	1	3	1	5	4	1	2.85714	4	4	4	3	4	4	4	3.85714	2.75325	3	3	3	3	3	3	2	2	2	6	18	24	3	4	3	3	4	3	1	1	2	4	20	24
1783	2021-12-30	Senior Two	female	16	6-8h/d	Specialties	Specialties	1.90909	3	2	2	2	1	2	2	2	2	1	1	1	2	2	1	1.42857	1.77922	4	3	4	3	4	4	4	4	4	12	22	34	4	4	4	4	4	4	4	4	4	12	24	36
1784	2021-12-30	Senior Two	male	17	＜6h/d	High school and blow	Specialties	1.22727	3	1	1	1	1	2	2	1.57143	2	1	1	1	2	3	3	1.85714	1.55195	3	2	3	3	3	2	4	4	4	12	16	28	3	2	2	3	3	2	4	4	4	12	15	27
1785	2021-12-30	Senior Two	female	17	＜6h/d	High school and blow	Undergraduate	1.36364	4	1	1	1	1	3	3	2	4	2	2	2	4	1	1	2.28571	1.88312	3	3	2	3	4	2	2	2	2	6	17	23	3	2	3	3	4	2	3	2	2	7	17	24
1786	2021-12-30	Senior Two	male	16	＜6h/d	Specialties	Undergraduate	1.09091	3	2	2	1	1	4	2	2.14286	2	2	2	2	3	2	2	2.14286	1.79221	3	3	3	3	3	3	2	2	2	6	18	24	3	3	3	3	3	3	2	2	2	6	18	24
1787	2021-12-30	Senior Two	male	17	6-8h/d	High school and blow	High school and blow	1.09091	5	1	3	1	1	1	2	2	5	2	2	2	5	2	1	2.71429	1.93506	3	3	3	3	3	3	2	3	3	8	18	26	3	3	3	3	2	3	3	3	3	9	17	26
1788	2021-12-30	Senior Two	male	17	6-8h/d	High school and blow	High school and blow	1.5	3	1	2	3	1	3	2	2.14286	1	1	1	2	1	2	2	1.42857	1.69048	3	3	3	2	3	2	3	3	3	9	16	25	3	2	2	2	2	3	2	3	3	8	14	22
1789	2021-12-30	Senior Two	female	16	6-8h/d	High school and blow	High school and blow	1.40909	4	1	2	2	1	3	2	2.14286	1	1	1	1	2	2	3	1.57143	1.70779	3	3	3	3	2	2	3	3	3	9	16	25	3	2	2	2	2	3	3	3	3	9	14	23
1790	2021-12-30	Senior Two	male	16	6-8h/d	Specialties	High school and blow	1.09091	4	1	2	1	1	2	2	1.85714	1	1	1	1	1	4	4	1.85714	1.60173	4	3	3	3	3	3	3	3	3	9	19	28	4	3	3	3	3	3	3	3	3	9	19	28
1791	2021-12-30	Senior Two	male	17	＜6h/d	Undergraduate	Undergraduate	1.22727	5	2	1	2	4	4	3	3	1	1	1	1	1	4	4	1.85714	2.02814	4	4	3	3	3	2	4	4	4	12	19	31	4	4	3	3	3	2	4	4	4	12	19	31
1792	2021-12-30	Senior Two	female	16	＜6h/d	High school and blow	Specialties	1.09091	4	1	2	1	1	1	1	1.57143	3	2	2	2	3	2	2	2.28571	1.64935	3	4	4	4	3	4	3	3	2	8	22	30	3	3	3	3	2	3	3	2	2	7	17	24
1793	2021-12-30	Senior Two	female	16	6-8h/d	Undergraduate	Undergraduate	1.59091	5	2	1	1	1	3	2	2.14286	2	1	1	2	3	4	4	2.42857	2.05411	3	3	4	3	1	3	2	3	2	7	17	24	3	3	3	3	1	2	1	3	2	6	15	21
1794	2021-12-30	Senior Two	male	16	6-8h/d	High school and blow	High school and blow	1.77273	4	2	3	2	3	2	3	2.71429	2	2	2	2	2	4	3	2.42857	2.30519	3	3	3	3	3	3	3	3	3	9	18	27	3	3	3	3	3	3	3	3	3	9	18	27
1795	2021-12-30	Senior Two	male	17	6-8h/d	Undergraduate	Undergraduate	1.68182	5	4	3	5	5	5	4	4.42857	5	5	5	5	5	4	5	4.85714	3.65584	3	3	2	3	3	2	2	3	1	6	16	22	2	3	2	3	2	3	3	4	4	11	15	26
1796	2021-12-30	Senior Two	female	16	6-8h/d	High school and blow	High school and blow	2.40909	5	1	2	1	1	5	2	2.42857	1	2	2	2	3	3	4	2.42857	2.42208	3	3	3	3	3	3	2	2	2	6	18	24	3	3	3	3	3	3	2	2	2	6	18	24
1797	2021-12-30	Senior Two	female	16	＜6h/d	Undergraduate	Undergraduate	1.68182	4	1	1	1	1	1	2	1.57143	4	2	2	2	4	1	1	2.28571	1.84632	3	3	3	2	2	2	4	4	4	12	15	27	3	3	3	3	3	2	4	4	4	12	17	29
1798	2021-12-30	Senior Two	male	17	＜6h/d	Specialties	Specialties	1.36364	3	2	2	2	2	2	2	2.14286	2	2	2	2	3	2	2	2.14286	1.88312	3	3	3	3	3	3	3	3	3	9	18	27	3	3	3	3	3	3	4	4	4	12	18	30
1799	2021-12-30	Senior Two	female	17	6-8h/d	Specialties	Specialties	1.09091	3	1	1	1	3	3	3	2.14286	3	3	3	3	2	3	3	2.85714	2.0303	2	2	2	1	3	3	2	2	4	8	13	21	2	2	2	2	3	2	2	2	3	7	13	20
1800	2021-12-30	Senior Two	female	16	6-8h/d	High school and blow	High school and blow	1.63636	4	1	1	1	1	3	2	1.85714	1	1	1	2	3	1	1	1.42857	1.64069	3	3	3	2	2	2	3	3	3	9	15	24	3	2	2	2	2	2	3	3	3	9	13	22
1801	2021-12-30	Senior Two	female	17	6-8h/d	High school and blow	Undergraduate	1.36364	3	2	2	2	1	1	2	1.85714	2	2	2	2	2	3	4	2.42857	1.88312	3	3	3	1	2	2	3	3	3	9	14	23	1	1	1	1	1	1	4	4	4	12	6	18
1802	2021-12-30	Senior Two	female	17	6-8h/d	High school and blow	High school and blow	3.04545	5	2	2	3	3	3	5	3.28571	1	1	1	2	2	3	3	1.85714	2.72944	3	2	2	2	3	2	3	3	2	8	14	22	3	3	2	3	3	2	3	3	3	9	16	25
1803	2021-12-30	Senior Two	male	17	6-8h/d	Specialties	High school and blow	1.36364	4	1	1	1	1	1	2	1.57143	1	2	2	2	5	5	5	3.14286	2.02597	3	3	3	2	2	2	3	3	3	9	15	24	3	3	2	2	2	2	3	3	3	9	14	23
1804	2021-12-30	Senior Two	female	16	6-8h/d	High school and blow	Specialties	1.13636	5	1	2	1	1	4	4	2.57143	3	3	3	3	3	1	1	2.42857	2.04545	2	2	3	3	4	2	4	4	3	11	16	27	2	2	2	2	2	2	3	3	3	9	12	21
1805	2021-12-30	Senior Two	female	17	6-8h/d	High school and blow	Specialties	1.27273	4	1	2	1	1	4	4	2.42857	3	3	3	3	3	1	1	2.42857	2.04329	1	3	3	2	4	2	3	3	3	9	15	24	3	3	3	3	2	2	2	2	3	7	16	23
1806	2021-12-30	Senior Two	male	17	6-8h/d	Specialties	Undergraduate	1.13636	5	2	5	2	1	5	5	3.57143	5	5	5	5	5	3	3	4.42857	3.04545	3	3	3	3	3	3	2	2	2	6	18	24	3	3	3	3	3	3	2	2	2	6	18	24
1807	2021-12-30	Senior Two	male	16	＜6h/d	Undergraduate	High school and blow	1.04545	5	2	2	1	1	1	2	2	1	1	1	2	1	3	1	1.42857	1.49134	3	3	3	3	3	3	2	2	2	6	18	24	3	4	4	4	3	4	2	2	1	5	22	27
1808	2021-12-30	Senior Two	male	17	6-8h/d	Specialties	Specialties	1.5	5	2	2	2	1	4	4	2.85714	4	4	4	3	4	4	4	3.85714	2.7381	2	2	2	1	3	3	2	2	4	8	13	21	2	2	2	2	3	2	2	2	3	7	13	20
1809	2021-12-30	Senior Two	female	17	＜6h/d	High school and blow	High school and blow	1.27273	3	3	3	2	1	2	2	2.28571	2	2	2	2	2	1	1	1.71429	1.75758	3	3	3	3	3	3	2	2	2	6	18	24	3	3	3	3	3	3	2	2	2	6	18	24
1810	2021-12-30	Senior Two	female	16	＜6h/d	Specialties	High school and blow	1.27273	3	1	1	1	2	3	3	2	2	2	2	2	2	1	1	1.71429	1.66234	3	3	3	3	3	3	2	2	2	6	18	24	3	3	3	3	3	3	2	2	2	6	18	24
1811	2021-12-30	Senior Two	male	18	6-8h/d	High school and blow	High school and blow	1.68182	3	3	3	2	2	3	3	2.71429	5	5	5	4	4	5	5	4.71429	3.0368	3	3	3	3	3	3	3	3	3	9	18	27	3	3	3	3	3	3	3	3	3	9	18	27
1812	2021-12-30	Senior Two	male	16	6-8h/d	Specialties	Specialties	1.18182	5	2	1	1	1	3	2	2.14286	1	1	1	2	2	1	1	1.28571	1.5368	3	1	1	1	2	1	4	4	4	12	9	21	3	1	1	1	1	1	4	4	4	12	8	20
1813	2021-12-30	Senior Two	female	17	＜6h/d	High school and blow	High school and blow	1.18182	4	1	1	1	1	1	2	1.57143	1	1	1	2	1	1	2	1.28571	1.34632	3	3	3	2	2	2	3	3	3	9	15	24	3	3	2	2	2	2	3	3	3	9	14	23
1814	2021-12-30	Senior Two	female	16	6-8h/d	Undergraduate	Specialties	1.18182	1	2	1	1	2	2	2	1.57143	1	1	1	1	2	1	1	1.14286	1.2987	3	3	3	3	3	3	4	4	4	12	18	30	3	3	3	3	3	3	4	4	4	12	18	30
1815	2021-12-30	Senior Two	female	16	＜6h/d	High school and blow	High school and blow	1.13636	3	1	1	1	1	1	2	1.42857	1	1	1	1	2	1	1	1.14286	1.23593	1	1	1	1	1	1	4	4	4	12	6	18	2	2	2	2	2	2	3	3	3	9	12	21
1816	2021-12-30	Senior Two	female	16	＜6h/d	Undergraduate	Undergraduate	1.22727	2	1	1	1	1	1	1	1.14286	1	1	1	1	1	1	1	1	1.12338	1	1	1	1	1	1	4	4	4	12	6	18	1	1	1	1	1	1	4	4	4	12	6	18
1817	2021-12-30	Senior Two	female	17	6-8h/d	Specialties	High school and blow	1.18182	4	5	5	1	1	3	2	3	1	2	1	1	2	2	1	1.42857	1.87013	4	3	3	3	3	3	3	3	2	8	19	27	3	2	2	3	3	2	4	4	4	12	15	27
1818	2021-12-30	Senior Two	female	16	＜6h/d	Specialties	Specialties	1.31818	4	2	2	1	1	2	2	2	1	1	1	2	1	1	1	1.14286	1.48701	3	3	2	3	2	2	3	3	3	9	15	24	3	3	3	3	2	2	3	3	3	9	16	25
1819	2021-12-30	Senior Two	female	16	＜6h/d	High school and blow	High school and blow	1.31818	4	2	2	1	1	2	2	2	1	1	1	2	1	1	1	1.14286	1.48701	3	3	2	3	2	2	3	3	3	9	15	24	3	3	3	3	2	2	3	3	3	9	16	25
1820	2021-12-30	Senior Two	female	17	＜6h/d	High school and blow	High school and blow	1.40909	3	1	2	2	1	3	2	2	1	1	1	1	2	3	2	1.57143	1.66017	4	4	4	3	4	4	2	3	1	6	23	29	4	4	4	3	3	3	2	3	2	7	21	28
1821	2021-12-30	Senior Two	female	17	＜6h/d	Specialties	Specialties	1.18182	2	1	1	1	1	4	1	1.57143	1	1	1	2	1	1	1	1.14286	1.2987	3	3	3	2	2	2	3	3	3	9	15	24	3	3	3	2	2	2	3	3	3	9	15	24
1822	2021-12-30	Senior Two	female	16	6-8h/d	High school and blow	High school and blow	1.54545	2	2	1	1	1	2	2	1.57143	1	1	1	1	2	1	1	1.14286	1.41991	3	2	3	2	2	2	3	3	3	9	14	23	4	2	3	3	3	2	3	3	3	9	17	26
1823	2021-12-30	Senior Two	female	17	6-8h/d	Specialties	Specialties	1.04545	2	1	1	1	1	1	1	1.14286	1	1	1	1	2	1	1	1.14286	1.11039	1	1	1	4	1	2	2	2	3	7	10	17	1	1	3	1	1	1	2	2	3	7	8	15
1824	2021-12-30	Senior Two	female	17	6-8h/d	High school and blow	High school and blow	1.40909	2	1	1	1	1	1	2	1.28571	1	1	2	1	1	1	1	1.14286	1.27922	1	2	2	2	2	2	2	3	3	8	11	19	1	2	2	2	2	2	2	2	3	7	11	18
1825	2021-12-30	Senior Two	male	16	＜6h/d	Undergraduate	Undergraduate	1.54545	4	2	2	2	2	2	3	2.42857	2	2	2	1	2	2	2	1.85714	1.94372	3	3	3	3	3	3	3	3	3	9	18	27	3	3	3	3	3	3	3	3	3	9	18	27
1826	2021-12-30	Senior Two	female	17	6-8h/d	Specialties	Undergraduate	1.31818	5	3	2	2	3	4	4	3.28571	2	2	2	2	3	4	2	2.42857	2.34416	2	3	3	3	3	3	3	3	3	9	17	26	4	4	4	4	4	4	3	3	3	9	24	33
1827	2021-12-30	Senior Two	female	16	＜6h/d	Undergraduate	Undergraduate	1.5	4	1	1	1	3	4	3	2.42857	2	2	2	3	2	2	2	2.14286	2.02381	2	2	2	2	2	2	3	2	3	8	12	20	3	3	2	2	2	2	2	2	2	6	14	20
1828	2021-12-30	Senior Two	female	17	6-8h/d	Specialties	Undergraduate	1.5	3	1	2	1	4	4	3	2.57143	1	1	1	2	1	1	1	1.14286	1.7381	2	3	2	2	2	3	2	3	3	8	14	22	2	3	3	2	3	3	2	2	3	7	16	23
1829	2021-12-30	Senior Two	female	17	＜6h/d	Specialties	Specialties	1.09091	3	1	2	3	3	3	1	2.28571	2	2	1	1	1	1	1	1.28571	1.55411	4	4	4	4	4	4	1	1	1	3	24	27	3	3	4	4	4	4	1	1	1	3	22	25
1830	2021-12-30	Senior Two	male	17	6-8h/d	Specialties	Specialties	1.63636	3	2	2	3	3	3	1	2.42857	2	2	1	1	1	1	1	1.28571	1.78355	3	4	4	4	4	4	1	1	1	3	23	26	3	3	3	3	3	3	1	1	1	3	18	21
1831	2021-12-30	Senior Two	female	16	＜6h/d	High school and blow	High school and blow	1.27273	3	1	1	1	1	1	1	1.28571	1	2	1	1	2	1	1	1.28571	1.28139	1	1	1	1	1	3	3	2	2	7	8	15	1	1	1	1	1	3	3	2	2	7	8	15
1832	2021-12-30	Senior Two	male	17	＜6h/d	High school and blow	High school and blow	1	2	1	1	1	1	1	1	1.14286	1	1	1	1	1	1	1	1	1.04762	2	2	2	2	2	2	3	3	3	9	12	21	2	2	2	2	2	2	3	3	3	9	12	21
1833	2021-12-30	Senior Two	female	16	＜6h/d	Specialties	High school and blow	1	2	2	2	2	2	2	1	1.85714	1	1	1	1	1	1	1	1	1.28571	3	3	3	3	3	4	1	2	2	5	19	24	3	3	3	3	3	3	2	2	2	6	18	24
1834	2021-12-30	Senior Two	female	16	＜6h/d	Specialties	Undergraduate	1.27273	1	1	2	2	1	2	1	1.42857	1	1	2	1	1	1	1	1.14286	1.28139	2	2	3	3	2	2	3	3	3	9	14	23	3	3	3	3	3	1	4	4	4	12	16	28
1835	2021-12-30	Senior Year	male	17	6-8h/d	Specialties	Undergraduate	1.18182	5	1	1	2	2	2	1	2	1	4	1	1	4	1	2	2	1.72727	4	4	4	4	4	4	1	1	1	3	24	27	4	4	4	4	4	4	1	1	1	3	24	27
1836	2021-12-30	Senior Year	male	18	6-8h/d	Specialties	Specialties	1.63636	4	3	4	2	3	3	3	3.14286	4	4	4	4	3	4	4	3.85714	2.87879	3	3	3	3	3	3	2	2	3	7	18	25	3	3	3	3	3	3	2	2	3	7	18	25
1837	2021-12-30	Senior Year	male	17	＜6h/d	High school and blow	High school and blow	1.86364	5	2	3	3	2	3	5	3.28571	4	4	4	4	4	4	3	3.85714	3.00216	2	2	2	2	2	3	3	3	3	9	13	22	2	2	2	2	2	3	3	3	3	9	13	22
1838	2021-12-30	Senior Year	female	18	＜6h/d	Undergraduate	Specialties	1.45455	4	3	3	1	1	4	1	2.42857	2	2	2	2	2	3	2	2.14286	2.00866	3	3	2	3	2	3	4	4	4	12	16	28	3	3	2	3	2	2	4	4	4	12	15	27
1839	2021-12-30	Senior Year	female	18	＜6h/d	High school and blow	High school and blow	1.45455	4	1	1	1	1	5	1	2	1	3	1	1	3	1	1	1.57143	1.67532	3	2	2	2	2	2	2	3	3	8	13	21	3	3	3	2	2	2	3	3	3	9	15	24
1840	2021-12-30	Senior Year	female	17	＜6h/d	Undergraduate	Specialties	1.27273	4	2	1	2	1	2	1	1.85714	1	2	1	1	2	2	2	1.57143	1.5671	3	2	3	2	2	2	3	3	3	9	14	23	2	2	2	2	2	2	3	3	3	9	12	21
1841	2021-12-30	Senior Year	male	17	6-8h/d	High school and blow	High school and blow	1.36364	3	2	2	2	2	3	2	2.28571	1	2	1	2	1	2	2	1.57143	1.74026	4	4	4	4	4	4	4	4	4	12	24	36	4	4	4	4	4	4	4	4	4	12	24	36
1842	2021-12-30	Senior Year	male	17	＜6h/d	Specialties	Specialties	1	1	1	1	1	1	1	1	1	1	1	1	1	1	1	1	1	1	4	4	4	4	4	4	1	1	1	3	24	27	4	4	4	4	4	4	1	1	1	3	24	27
1843	2021-12-30	Senior Year	male	17	6-8h/d	High school and blow	High school and blow	1.27273	4	1	2	1	1	3	2	2	1	4	1	1	4	1	1	1.85714	1.70996	3	3	3	3	3	3	2	2	2	6	18	24	3	2	2	2	3	2	2	2	2	6	14	20
1844	2021-12-30	Senior Year	male	18	6-8h/d	Undergraduate	Undergraduate	2.13636	5	3	3	3	5	5	5	4.14286	5	5	5	4	5	5	5	4.85714	3.71212	3	3	4	3	4	3	3	4	4	11	20	31	4	4	4	4	3	2	3	4	4	11	21	32
1845	2021-12-30	Senior Year	female	18	6-8h/d	High school and blow	High school and blow	1.27273	4	1	2	1	1	2	2	1.85714	1	1	1	1	2	1	1	1.14286	1.42424	2	2	2	2	2	2	3	3	3	9	12	21	2	2	2	2	2	2	3	3	3	9	12	21
1846	2021-12-30	Senior Year	female	17	＜6h/d	Specialties	Specialties	1.22727	2	1	1	2	3	2	1	1.71429	1	1	1	1	1	1	2	1.14286	1.36147	4	3	3	2	2	2	2	2	2	6	16	22	3	2	2	3	3	2	3	3	3	9	15	24
1847	2021-12-30	Senior Year	female	17	＜6h/d	High school and blow	High school and blow	1.40909	5	1	2	1	2	3	4	2.57143	5	5	5	5	5	2	3	4.28571	2.75541	3	2	2	1	3	1	2	2	2	6	12	18	3	1	1	1	1	1	1	1	1	3	8	11
1848	2021-12-30	Senior Year	female	17	6-8h/d	Specialties	Undergraduate	1.5	5	1	1	1	1	2	1	1.71429	2	1	1	1	2	1	1	1.28571	1.5	2	2	2	1	3	3	3	4	3	10	13	23	4	3	3	2	2	3	3	2	3	8	17	25
1849	2021-12-30	Senior Year	female	17	＜6h/d	High school and blow	Specialties	1.5	4	2	2	3	3	3	2	2.71429	2	3	2	2	3	4	4	2.85714	2.35714	2	2	3	2	2	2	4	3	2	9	13	22	4	4	4	2	2	2	4	4	3	11	18	29
1850	2021-12-30	Senior Year	female	17	＜6h/d	Specialties	High school and blow	1.68182	4	2	2	1	1	2	4	2.28571	2	4	2	2	4	1	1	2.28571	2.08442	3	3	3	3	3	2	2	2	2	6	17	23	3	3	3	3	3	2	2	2	2	6	17	23
1851	2021-12-30	Senior Year	male	17	6-8h/d	High school and blow	High school and blow	1.22727	5	1	2	1	5	3	3	2.85714	3	4	3	3	4	3	3	3.28571	2.45671	3	2	2	2	2	2	3	3	3	9	13	22	3	2	2	2	2	2	3	3	3	9	13	22
1852	2021-12-30	Senior Year	female	18	6-8h/d	High school and blow	High school and blow	1.40909	4	1	1	1	1	3	2	1.85714	2	1	1	1	2	2	2	1.57143	1.61255	3	3	3	3	3	3	3	3	3	9	18	27	3	2	3	3	2	3	3	3	3	9	16	25
1853	2021-12-30	Senior Year	female	18	＜6h/d	High school and blow	High school and blow	1.31818	5	1	2	1	1	2	2	2	1	1	1	1	1	1	2	1.14286	1.48701	2	3	3	2	2	3	3	3	3	9	15	24	2	3	2	2	2	3	3	3	3	9	14	23
1854	2021-12-30	Senior Year	female	18	＜6h/d	High school and blow	High school and blow	1.31818	3	1	2	1	1	3	2	1.85714	1	2	1	1	1	1	1	1.14286	1.43939	1	1	1	1	2	1	3	3	4	10	7	17	1	1	1	1	1	1	4	4	4	12	6	18
1855	2021-12-30	Senior Year	male	17	＜6h/d	Undergraduate	High school and blow	1.59091	4	1	2	1	1	4	2	2.14286	3	3	3	3	2	3	3	2.85714	2.19697	2	3	3	2	3	3	3	3	3	9	16	25	3	3	3	3	3	3	3	3	3	9	18	27
1856	2021-12-30	Senior Year	female	17	6-8h/d	Undergraduate	Undergraduate	1.09091	2	1	2	1	1	3	2	1.71429	1	2	1	1	2	1	2	1.42857	1.41126	4	3	3	2	4	1	3	3	3	9	17	26	4	3	3	2	4	2	3	3	3	9	18	27
1857	2021-12-30	Senior Year	male	18	6-8h/d	High school and blow	High school and blow	1.54545	5	2	2	3	1	5	5	3.28571	2	2	2	3	2	2	2	2.14286	2.32468	4	4	3	4	4	4	4	4	4	12	23	35	4	4	3	4	4	4	4	4	4	12	23	35
1858	2021-12-30	Senior Year	male	18	6-8h/d	High school and blow	High school and blow	1.45455	5	2	2	1	1	3	2	2.28571	2	4	2	2	4	3	3	2.85714	2.19913	3	2	3	2	2	2	3	3	3	9	14	23	3	2	3	2	2	2	3	3	3	9	14	23
1859	2021-12-30	Senior Year	male	17	＜6h/d	Specialties	Specialties	1.09091	2	1	1	1	1	1	1	1.14286	1	1	1	2	1	1	1	1.14286	1.12554	3	3	3	3	3	3	3	3	3	9	18	27	3	3	3	3	3	3	3	3	3	9	18	27
1860	2021-12-30	Senior Year	male	18	6-8h/d	High school and blow	High school and blow	1.59091	5	1	2	1	3	2	3	2.42857	2	4	2	2	4	3	3	2.85714	2.29221	4	3	3	2	1	2	4	3	4	11	15	26	4	3	3	1	1	1	4	4	4	12	13	25
1861	2021-12-30	Senior Year	female	18	6-8h/d	High school and blow	High school and blow	1.40909	4	1	1	1	1	5	5	2.57143	4	4	4	4	4	4	2	3.71429	2.56494	3	2	3	3	2	3	1	1	2	4	16	20	3	2	2	3	3	3	1	1	2	4	16	20
1862	2021-12-30	Senior Year	female	18	＜6h/d	High school and blow	High school and blow	1.13636	5	1	2	1	1	1	2	1.85714	2	4	1	1	4	1	1	2	1.6645	3	2	2	3	3	3	3	2	3	8	16	24	3	2	2	3	2	3	3	3	3	9	15	24
1863	2021-12-30	Senior Year	female	17	＜6h/d	High school and blow	High school and blow	1.27273	4	1	1	1	1	2	1	1.57143	2	2	2	2	2	1	1	1.71429	1.51948	3	4	4	3	2	2	3	3	3	9	18	27	2	2	2	2	2	2	3	3	3	9	12	21
1864	2021-12-30	Senior Year	female	17	＜6h/d	High school and blow	High school and blow	1.5	4	1	2	3	3	4	3	2.85714	1	4	2	3	4	2	1	2.42857	2.2619	3	3	3	3	2	3	2	2	3	7	17	24	3	3	3	3	2	3	2	2	3	7	17	24
1865	2021-12-30	Senior Year	male	17	6-8h/d	High school and blow	High school and blow	1.77273	5	1	1	3	3	5	3	3	1	1	1	1	1	3	3	1.57143	2.11472	3	3	2	2	2	2	3	3	3	9	14	23	3	3	3	3	3	2	3	3	4	10	17	27
1866	2021-12-30	Senior Year	female	17	＜6h/d	High school and blow	High school and blow	1.45455	5	2	2	1	4	5	5	3.42857	1	3	2	1	3	1	2	1.85714	2.24675	3	2	4	1	1	1	4	4	4	12	12	24	2	2	2	2	2	1	4	4	4	12	11	23
1867	2021-12-30	Senior Year	female	17	＜6h/d	Specialties	High school and blow	1.40909	5	1	2	1	1	1	1	1.71429	1	1	1	1	2	1	1	1.14286	1.42208	3	3	2	4	2	3	3	3	3	9	17	26	3	2	2	4	1	2	2	2	2	6	14	20
1868	2021-12-30	Senior Year	female	16	6-8h/d	High school and blow	High school and blow	1.36364	3	1	2	1	1	2	2	1.71429	1	1	1	1	1	3	2	1.42857	1.50216	2	2	3	2	2	2	3	3	3	9	13	22	3	3	3	3	2	2	3	3	3	9	16	25
1869	2021-12-30	Senior Two	male	17	6-8h/d	High school and blow	High school and blow	1.18182	1	2	2	2	1	2	2	1.71429	1	1	1	1	1	1	4	1.42857	1.44156	2	2	2	2	2	2	2	2	2	6	12	18	2	2	2	2	2	2	2	2	2	6	12	18
1870	2021-12-30	Senior Two	male	17	＜6h/d	Specialties	High school and blow	1.5	3	1	1	2	4	3	2	2.28571	1	2	2	1	1	1	1	1.28571	1.69048	3	3	3	3	3	2	3	3	3	9	17	26	3	3	3	3	3	2	3	3	3	9	17	26
1871	2021-12-30	Senior Two	male	16	6-8h/d	High school and blow	High school and blow	1.31818	4	1	1	2	2	2	2	2	1	1	1	1	1	2	2	1.28571	1.53463	2	2	2	2	2	3	3	3	3	9	13	22	1	1	1	1	1	1	3	3	3	9	6	15
1872	2021-12-30	Senior Two	female	16	＜6h/d	Specialties	High school and blow	1.5	3	1	3	1	1	5	2	2.28571	1	1	2	1	2	2	2	1.57143	1.78571	3	3	3	3	2	3	3	3	3	9	17	26	3	3	3	3	2	3	2	3	3	8	17	25
1873	2021-12-30	Senior Two	female	17	＜6h/d	Undergraduate	Undergraduate	1.40909	3	1	3	1	1	1	1	1.57143	2	2	2	2	2	3	3	2.28571	1.75541	2	2	2	3	2	3	2	2	2	6	14	20	2	3	2	3	2	2	2	3	2	7	14	21
1874	2021-12-30	Senior Two	female	17	＜6h/d	High school and blow	High school and blow	1.13636	2	1	2	1	1	2	1	1.42857	1	1	1	1	1	2	1	1.14286	1.23593	4	3	3	3	3	3	3	3	3	9	19	28	2	2	3	4	3	3	4	4	4	12	17	29
1875	2021-12-30	Senior Two	female	16	6-8h/d	High school and blow	High school and blow	1.40909	4	1	2	3	2	3	1	2.28571	1	1	1	1	1	2	2	1.28571	1.66017	3	3	3	3	3	2	2	2	2	6	17	23	3	3	3	3	3	2	2	2	2	6	17	23
1876	2021-12-30	Senior Two	female	16	＜6h/d	High school and blow	High school and blow	1.54545	4	2	3	1	1	5	2	2.57143	2	3	2	3	1	2	2	2.14286	2.08658	3	2	3	2	3	3	3	3	3	9	16	25	4	4	4	3	3	3	3	3	3	9	21	30
1877	2021-12-30	Senior Two	male	16	＜6h/d	High school and blow	High school and blow	1.18182	3	1	1	1	1	2	1	1.42857	1	1	1	1	2	1	1	1.14286	1.25108	2	2	2	2	2	2	3	2	2	7	12	19	2	2	2	2	2	2	3	3	3	9	12	21
1878	2021-12-30	Senior Two	male	16	＜6h/d	High school and blow	High school and blow	1.36364	3	1	2	1	2	3	2	2	1	1	1	1	1	5	5	2.14286	1.8355	4	3	4	3	3	3	4	4	4	12	20	32	4	3	4	1	1	4	3	3	3	9	17	26
1879	2021-12-30	Senior Two	male	16	＜6h/d	Undergraduate	Specialties	1.13636	3	1	1	1	5	5	5	3	4	4	4	3	4	4	4	3.85714	2.6645	3	2	2	2	2	2	2	3	3	8	13	21	4	3	3	3	3	3	2	2	3	7	19	26
1880	2021-12-30	Senior Two	male	17	6-8h/d	Specialties	Specialties	1.22727	3	2	2	1	1	2	1	1.71429	1	1	1	1	1	1	2	1.14286	1.36147	3	3	2	3	3	2	3	3	3	9	16	25	3	3	3	3	3	3	3	3	3	9	18	27
1881	2021-12-30	Senior Two	male	17	6-8h/d	High school and blow	High school and blow	1.27273	3	1	1	2	1	1	2	1.57143	2	1	1	2	2	2	2	1.71429	1.51948	1	1	1	1	1	1	2	2	3	7	6	13	1	1	1	1	1	1	3	3	3	9	6	15
1882	2021-12-30	Senior Two	female	16	＜6h/d	Specialties	Undergraduate	1.36364	3	1	2	1	1	2	2	1.71429	2	2	2	2	2	3	3	2.28571	1.78788	2	3	3	3	3	3	3	3	2	8	17	25	2	3	3	3	2	3	3	3	2	8	16	24
1883	2021-12-30	Senior Two	male	16	＜6h/d	High school and blow	High school and blow	1.22727	2	1	2	1	1	1	1	1.28571	1	1	1	1	2	1	1	1.14286	1.21861	1	1	1	1	1	1	2	2	2	6	6	12	3	1	3	1	1	1	2	2	2	6	10	16
1884	2021-12-30	Senior Two	male	16	＜6h/d	High school and blow	High school and blow	1.18182	5	3	5	3	4	3	3	3.71429	1	5	5	2	2	5	4	3.42857	2.77489	2	2	2	2	3	2	2	1	2	5	13	18	2	2	2	2	2	4	1	1	1	3	14	17
1885	2021-12-30	Senior Two	female	16	＜6h/d	High school and blow	High school and blow	1.18182	4	1	1	1	2	2	1	1.71429	1	1	1	1	1	2	2	1.28571	1.39394	4	4	4	3	3	3	2	2	2	6	21	27	4	4	4	3	3	3	3	3	3	9	21	30
1886	2021-12-30	Senior Two	male	17	6-8h/d	Specialties	High school and blow	1.18182	2	1	1	1	1	1	1	1.14286	1	1	1	1	2	1	1	1.14286	1.15584	1	1	1	1	1	1	2	2	2	6	6	12	1	1	1	1	1	1	4	4	4	12	6	18
1887	2021-12-30	Senior Two	male	17	6-8h/d	Undergraduate	Undergraduate	1.18182	3	2	2	1	1	1	2	1.71429	2	1	1	1	1	2	1	1.28571	1.39394	3	3	3	3	3	1	4	4	4	12	16	28	3	3	3	3	3	1	4	4	4	12	16	28
1888	2021-12-30	Senior Two	female	16	＜6h/d	High school and blow	High school and blow	1.27273	3	1	1	1	1	4	2	1.85714	1	1	1	1	1	2	2	1.28571	1.47186	4	4	3	2	2	3	3	3	3	9	18	27	3	2	3	2	2	3	3	3	3	9	15	24
1889	2021-12-30	Senior Two	female	17	＜6h/d	Undergraduate	Undergraduate	1.40909	3	1	2	1	1	4	4	2.28571	1	2	1	3	2	3	2	2	1.89827	4	4	4	4	4	4	3	1	1	5	24	29	4	4	4	4	4	4	3	3	2	8	24	32
1890	2021-12-30	Senior Two	male	17	＜6h/d	Undergraduate	Undergraduate	1.27273	2	1	1	1	1	1	2	1.28571	2	2	2	2	2	3	2	2.14286	1.5671	3	3	3	4	4	4	3	3	2	8	21	29	4	4	4	4	4	4	3	2	3	8	24	32
1891	2021-12-30	Senior Two	male	16	＜6h/d	Specialties	High school and blow	1.18182	2	3	3	1	1	2	2	2	1	2	2	1	1	1	1	1.28571	1.48918	1	1	1	1	1	2	4	4	4	12	7	19	2	2	1	1	1	1	4	4	4	12	8	20
1892	2021-12-30	Senior Two	female	16	6-8h/d	Specialties	Specialties	1.09091	2	1	2	1	1	2	2	1.57143	1	1	1	2	1	1	1	1.14286	1.2684	4	3	3	3	2	2	3	3	3	9	17	26	4	3	3	3	2	2	3	3	3	9	17	26
1893	2021-12-30	Senior Two	male	16	＜6h/d	Undergraduate	Undergraduate	1.09091	3	1	1	1	1	1	1	1.28571	2	2	2	2	1	2	2	1.85714	1.41126	4	4	4	4	4	4	2	2	2	6	24	30	4	4	4	4	4	4	1	1	1	3	24	27
1894	2021-12-30	Senior Two	female	16	6-8h/d	Specialties	Undergraduate	1.5	3	2	2	1	1	2	2	1.85714	2	2	1	1	1	1	2	1.42857	1.59524	4	3	3	3	3	4	3	3	3	9	20	29	4	4	4	4	4	4	3	3	3	9	24	33
1895	2021-12-30	Senior Two	male	16	6-8h/d	Specialties	Specialties	1.63636	4	1	1	1	1	4	3	2.14286	3	2	3	2	3	2	2	2.42857	2.06926	3	3	2	2	3	2	3	3	3	9	15	24	3	3	2	2	3	2	3	3	3	9	15	24
1896	2021-12-30	Senior Two	female	16	＜6h/d	High school and blow	High school and blow	1.36364	1	1	1	1	1	1	2	1.14286	1	1	1	1	2	1	1	1.14286	1.21645	2	2	3	2	2	3	3	3	3	9	14	23	2	2	3	2	2	3	3	3	3	9	14	23
1897	2021-12-30	Senior Two	female	16	6-8h/d	High school and blow	High school and blow	1.22727	1	1	1	1	1	5	1	1.57143	1	1	1	1	2	1	1	1.14286	1.31385	3	1	2	2	2	2	4	4	4	12	12	24	3	2	2	2	2	2	4	4	4	12	13	25
1898	2021-12-30	Senior Two	female	17	＜6h/d	High school and blow	High school and blow	1.22727	3	2	2	1	1	5	2	2.28571	3	2	2	2	3	3	2	2.42857	1.98052	3	3	3	3	3	3	3	3	3	9	18	27	3	3	3	3	3	3	3	3	3	9	18	27
1899	2021-12-30	Senior Two	male	16	＜6h/d	Undergraduate	Undergraduate	1.40909	3	2	1	1	5	3	4	2.71429	1	1	1	1	2	2	2	1.42857	1.85065	2	2	2	2	3	3	4	2	3	9	14	23	1	1	1	1	1	1	4	4	4	12	6	18
1900	2021-12-30	Senior Two	female	17	＜6h/d	Specialties	Specialties	1.22727	3	1	1	1	1	1	1	1.28571	1	1	1	1	1	1	2	1.14286	1.21861	4	1	3	1	4	1	1	1	4	6	14	20	1	1	1	1	1	1	1	1	4	6	6	12
1901	2021-12-30	Senior Two	male	16	6-8h/d	High school and blow	High school and blow	1.13636	2	1	3	1	1	2	2	1.71429	1	1	1	1	1	2	2	1.28571	1.37879	2	3	2	4	1	2	2	3	4	9	14	23	2	2	2	4	1	2	2	3	4	9	13	22
1902	2021-12-30	Senior Two	male	16	＜6h/d	High school and blow	High school and blow	1.63636	1	1	1	2	1	1	1	1.14286	2	1	1	2	1	1	1	1.28571	1.35498	4	4	4	4	3	3	4	4	4	12	22	34	3	3	3	4	4	1	4	4	4	12	18	30
1903	2021-12-30	Senior Two	male	17	＜6h/d	Specialties	Specialties	1.95455	3	2	3	2	4	5	3	3.14286	2	3	2	1	2	5	5	2.85714	2.65152	1	1	1	1	1	3	2	2	1	5	8	13	4	4	4	4	4	3	1	2	2	5	23	28
1904	2021-12-30	Senior Two	female	16	＜6h/d	High school and blow	High school and blow	1.45455	3	1	1	1	2	2	2	1.71429	1	1	1	1	1	1	2	1.14286	1.43723	3	3	3	2	3	3	4	4	4	12	17	29	3	3	3	2	3	3	2	4	4	10	17	27
1905	2021-12-30	Senior Two	male	16	＜6h/d	High school and blow	High school and blow	1.95455	4	1	2	1	2	3	2	2.14286	1	1	2	2	1	3	4	2	2.03247	3	3	2	3	2	3	2	3	3	8	16	24	2	4	2	3	3	4	3	2	2	7	18	25
1906	2021-12-29	First Year	female	12	8-10h/d	High school and blow	High school and blow	1.45455	3	2	2	1	3	2	2	2.14286	1	1	1	1	1	4	4	1.85714	1.81818	2	2	2	2	3	2	4	4	3	11	13	24	1	1	1	1	1	1	4	4	4	12	6	18
1907	2021-12-29	First Year	female	12	8-10h/d	High school and blow	High school and blow	1.22727	3	4	4	4	4	4	3	3.71429	2	2	2	2	1	1	2	1.71429	2.21861	3	3	3	3	2	2	3	3	3	9	16	25	3	3	3	3	3	3	3	4	4	11	18	29
1908	2021-12-29	First Year	female	12	6-8h/d	High school and blow	High school and blow	1.04545	4	2	3	1	1	3	2	2.28571	4	1	4	1	4	1	1	2.28571	1.87229	3	3	2	2	3	2	3	3	3	9	15	24	2	3	2	2	3	2	3	3	3	9	14	23
1909	2021-12-29	First Year	male	13	8-10h/d	High school and blow	High school and blow	1.68182	3	3	3	2	2	2	2	2.42857	3	3	3	3	3	4	4	3.28571	2.46537	4	3	3	4	4	4	4	4	4	12	22	34	3	3	3	3	3	3	3	3	3	9	18	27
1910	2021-12-29	First Year	female	12	6-8h/d	Specialties	Specialties	1.36364	3	3	1	2	2	2	2	2.14286	1	1	1	1	1	1	5	1.57143	1.69264	3	2	2	2	3	2	3	3	3	9	14	23	3	3	3	3	3	3	3	3	3	9	18	27
1911	2021-12-29	First Year	female	12	8-10h/d	Undergraduate	Undergraduate	1.45455	3	2	2	1	1	1	2	1.71429	1	2	2	4	5	5	3	3.14286	2.1039	4	3	3	3	3	1	1	4	1	6	17	23	4	4	4	4	4	1	4	4	4	12	21	33
1912	2021-12-29	First Year	male	12	8-10h/d	High school and blow	High school and blow	1.31818	4	1	2	1	1	3	3	2.14286	3	3	3	1	3	2	1	2.28571	1.91558	2	2	2	2	3	3	4	4	4	12	14	26	1	1	1	1	1	1	4	4	4	12	6	18
1913	2021-12-29	First Year	female	13	8-10h/d	High school and blow	Specialties	1.04545	3	1	2	2	1	1	2	1.71429	3	1	1	1	1	1	1	1.28571	1.34848	3	2	4	2	2	3	2	2	2	6	16	22	2	4	4	4	4	4	1	1	1	3	22	25
1914	2021-12-29	First Year	female	13	8-10h/d	High school and blow	Undergraduate	1.90909	5	3	1	1	5	5	5	3.57143	2	2	4	1	2	3	3	2.42857	2.63636	2	2	2	2	3	2	4	4	4	12	13	25	2	2	2	2	2	2	4	4	4	12	12	24
1915	2021-12-29	First Year	female	13	6-8h/d	High school and blow	Specialties	1.81818	5	3	2	3	5	4	3	3.57143	1	2	1	2	5	5	4	2.85714	2.74892	4	4	3	3	3	4	3	3	2	8	21	29	4	4	3	3	4	3	3	3	3	9	21	30
1916	2021-12-29	First Year	male	12	6-8h/d	Undergraduate	Undergraduate	1.31818	5	1	3	3	3	5	3	3.28571	3	4	3	4	5	5	5	4.14286	2.91558	3	3	3	3	3	3	3	3	3	9	18	27	3	3	3	3	3	3	3	3	3	9	18	27
1917	2021-12-29	First Year	male	13	8-10h/d	Undergraduate	Undergraduate	2.31818	4	2	2	4	5	4	4	3.57143	3	3	3	3	3	3	2	2.85714	2.91558	4	4	4	4	4	4	1	1	1	3	24	27	4	4	4	4	4	4	3	3	3	9	24	33
1918	2021-12-29	First Year	male	12	6-8h/d	High school and blow	High school and blow	2	4	2	2	1	3	1	3	2.28571	2	2	2	2	3	2	2	2.14286	2.14286	4	4	4	1	1	4	1	1	1	3	18	21	4	4	4	1	1	4	1	1	1	3	18	21
1919	2021-12-29	First Year	female	14	6-8h/d	Undergraduate	Specialties	2.27273	3	3	3	3	1	3	3	2.71429	3	4	3	3	4	5	5	3.85714	2.94805	3	3	3	3	3	3	2	2	2	6	18	24	3	3	3	3	3	3	2	2	2	6	18	24
1920	2021-12-29	First Year	female	13	6-8h/d	High school and blow	High school and blow	1.18182	5	3	1	2	2	3	2	2.57143	2	3	3	3	3	3	3	2.85714	2.20346	3	3	3	3	3	3	2	2	2	6	18	24	3	3	3	3	3	3	2	2	2	6	18	24
1921	2021-12-29	First Year	male	13	8-10h/d	Specialties	Specialties	1.22727	5	1	2	5	1	4	4	3.14286	1	2	3	3	4	4	4	3	2.45671	4	3	3	3	3	2	3	2	2	7	18	25	3	3	3	3	3	3	3	3	3	9	18	27
1922	2021-12-29	First Year	female	12	＜6h/d	High school and blow	High school and blow	1.09091	2	2	2	1	1	1	1	1.42857	3	3	3	3	4	4	4	3.42857	1.98268	3	3	3	3	3	3	2	2	2	6	18	24	4	4	4	4	4	4	4	4	4	12	24	36
1923	2021-12-29	First Year	male	12	6-8h/d	Postgraduate and above	Postgraduate and above	1.13636	2	2	2	2	2	2	2	2	1	1	1	1	1	2	1	1.14286	1.42641	1	1	1	1	1	1	4	4	4	12	6	18	4	4	4	4	4	4	1	1	1	3	24	27
1924	2021-12-29	First Year	female	13	6-8h/d	Specialties	Specialties	1.77273	5	2	2	1	1	4	2	2.42857	4	4	4	4	4	3	3	3.71429	2.63853	4	4	4	3	2	2	3	3	2	8	19	27	4	4	4	3	2	2	3	3	2	8	19	27
1925	2021-12-29	First Year	male	13	6-8h/d	High school and blow	High school and blow	2	5	1	1	3	2	5	2	2.71429	3	3	3	5	5	5	5	4.14286	2.95238	4	4	4	4	4	4	1	1	1	3	24	27	4	4	4	4	4	4	1	1	1	3	24	27
1926	2021-12-29	First Year	female	12	＜6h/d	High school and blow	Specialties	1.13636	3	1	1	1	1	2	1	1.42857	3	3	3	3	3	2	2	2.71429	1.75974	4	4	4	4	3	3	2	3	3	8	22	30	3	3	3	3	3	3	3	3	3	9	18	27
1927	2021-12-29	First Year	male	13	8-10h/d	Specialties	Specialties	1.59091	2	2	2	3	3	3	2	2.42857	5	5	4	3	3	2	2	3.42857	2.48268	4	4	4	4	4	4	1	1	1	3	24	27	3	4	4	4	4	4	1	2	2	5	23	28
1928	2021-12-29	First Year	male	13	8-10h/d	Specialties	Specialties	2.22727	1	2	4	3	5	4	3	3.14286	3	3	3	3	3	2	2	2.71429	2.69481	1	2	1	2	1	2	4	3	4	11	9	20	2	2	2	2	3	3	2	2	4	8	14	22
1929	2021-12-29	First Year	female	13	6-8h/d	High school and blow	High school and blow	1.63636	3	3	1	2	2	2	2	2.14286	2	2	2	2	2	1	1	1.71429	1.83117	4	4	4	4	4	4	3	3	3	9	24	33	4	4	4	4	4	4	3	3	3	9	24	33
1930	2021-12-29	First Year	male	13	＜6h/d	Specialties	Specialties	1.63636	5	5	2	5	1	1	5	3.42857	2	2	2	2	2	5	5	2.85714	2.64069	3	1	1	1	4	1	2	3	3	8	11	19	3	1	1	1	1	3	3	3	3	9	10	19
1931	2021-12-29	First Year	male	12	＜6h/d	Specialties	Specialties	1.45455	4	4	4	4	4	5	3	4	3	3	3	3	2	3	3	2.85714	2.77056	3	3	3	3	3	3	2	2	2	6	18	24	3	3	3	3	3	3	2	2	2	6	18	24
1932	2021-12-29	First Year	female	12	＜6h/d	Specialties	Specialties	1.59091	3	1	1	1	1	1	2	1.42857	2	2	2	2	1	2	2	1.85714	1.62554	4	4	4	4	4	4	1	1	3	5	24	29	4	4	4	4	4	4	1	1	4	6	24	30
1933	2021-12-29	First Year	female	12	＜6h/d	Specialties	Specialties	1.09091	3	2	2	1	1	2	2	1.85714	2	2	2	2	2	1	2	1.85714	1.60173	4	4	4	4	4	4	4	4	4	12	24	36	4	4	4	4	4	4	4	4	4	12	24	36
1934	2021-12-29	First Year	female	12	6-8h/d	Specialties	Specialties	1.90909	5	3	3	4	3	3	3	3.42857	3	2	3	3	4	3	2	2.85714	2.7316	4	4	4	4	3	2	4	4	4	12	21	33	3	4	4	3	3	2	4	4	4	12	19	31
1935	2021-12-29	First Year	female	13	8-10h/d	Specialties	Specialties	1.5	5	2	3	2	2	3	2	2.71429	2	1	3	3	2	4	3	2.57143	2.2619	4	2	2	2	2	2	3	3	3	9	14	23	2	4	2	2	2	2	3	3	3	9	14	23
1936	2021-12-29	First Year	female	13	8-10h/d	High school and blow	High school and blow	1.04545	3	1	3	3	2	3	3	2.57143	3	3	3	3	3	4	4	3.28571	2.30087	4	4	4	4	4	4	1	1	1	3	24	27	4	4	4	4	4	4	1	1	1	3	24	27
1937	2021-12-29	First Year	female	12	6-8h/d	Undergraduate	High school and blow	1.22727	5	1	2	2	2	4	2	2.57143	1	1	1	2	2	4	4	2.14286	1.98052	3	3	4	3	3	3	2	3	2	7	19	26	3	3	3	3	3	3	3	3	2	8	18	26
1938	2021-12-29	First Year	male	13	8-10h/d	Specialties	Specialties	1.04545	5	5	5	5	5	5	2	4.57143	5	5	5	5	5	3	3	4.42857	3.34848	4	4	4	4	4	4	3	3	3	9	24	33	4	4	4	4	3	3	3	3	3	9	22	31
1939	2021-12-29	First Year	male	13	8-10h/d	Specialties	Specialties	1.18182	3	3	3	2	1	2	2	2.28571	4	4	4	3	4	4	4	3.85714	2.44156	4	4	4	4	4	4	1	1	1	3	24	27	4	4	4	4	4	4	1	1	1	3	24	27
1940	2021-12-29	First Year	female	13	6-8h/d	Specialties	Specialties	1.59091	4	3	2	2	2	2	2	2.42857	2	2	2	2	1	3	3	2.14286	2.05411	3	3	3	3	3	3	2	2	2	6	18	24	4	4	4	3	3	3	2	2	2	6	21	27
1941	2021-12-29	First Year	female	13	＜6h/d	High school and blow	High school and blow	2.54545	5	2	2	2	2	3	5	3	3	3	3	3	3	5	5	3.57143	3.03896	4	4	4	4	4	4	1	1	1	3	24	27	4	4	4	4	4	4	1	1	1	3	24	27
1942	2021-12-29	First Year	male	11	＜6h/d	Undergraduate	Undergraduate	1.13636	3	3	3	1	1	2	2	2.14286	3	3	3	3	2	3	3	2.85714	2.04545	4	4	4	4	4	4	3	3	3	9	24	33	4	4	4	4	4	4	3	3	3	9	24	33
1943	2021-12-29	First Year	male	12	6-8h/d	Undergraduate	Undergraduate	1.54545	5	1	1	1	1	4	2	2.14286	2	2	2	2	2	3	3	2.28571	1.99134	1	1	1	1	1	3	3	4	4	11	8	19	1	3	1	1	1	1	4	4	4	12	8	20
1944	2021-12-29	First Year	female	13	6-8h/d	Specialties	Specialties	1.95455	3	3	3	1	1	1	2	2	3	2	2	2	1	1	2	1.85714	1.93723	4	4	4	4	4	4	4	4	4	12	24	36	2	2	3	2	3	3	3	3	3	9	15	24
1945	2021-12-29	First Year	female	12	＜6h/d	Specialties	High school and blow	1.95455	3	2	2	2	2	4	2	2.42857	1	1	2	2	2	3	3	2	2.12771	3	3	3	3	3	4	1	1	1	3	19	22	3	3	3	3	3	3	2	2	2	6	18	24
1946	2021-12-29	First Year	male	14	8-10h/d	High school and blow	High school and blow	1.04545	5	1	1	1	3	3	2	2.28571	1	1	1	1	1	2	2	1.28571	1.53896	2	2	2	2	3	2	4	4	4	12	13	25	2	2	2	2	2	3	4	4	4	12	13	25
1947	2021-12-29	First Year	female	12	6-8h/d	Specialties	Specialties	1.54545	3	1	1	1	3	4	5	2.57143	1	4	4	4	4	4	4	3.57143	2.56277	4	4	3	2	3	4	1	2	2	5	20	25	4	4	3	2	2	4	1	2	2	5	19	24
1948	2021-12-29	First Year	male	13	6-8h/d	Specialties	Specialties	1.27273	4	1	1	2	2	4	2	2.28571	1	1	1	1	1	3	4	1.71429	1.75758	2	2	2	2	4	3	2	3	3	8	15	23	3	3	3	3	3	3	3	3	2	8	18	26
1949	2021-12-29	First Year	male	12	8-10h/d	Specialties	High school and blow	1.59091	3	3	1	1	1	2	2	1.85714	2	2	2	1	2	3	1	1.85714	1.7684	3	3	3	3	3	3	4	4	4	12	18	30	3	3	3	3	3	3	4	4	4	12	18	30
1950	2021-12-29	First Year	female	13	8-10h/d	Specialties	Specialties	1.31818	4	1	2	1	1	2	3	2	1	1	1	1	1	2	2	1.28571	1.53463	3	3	3	3	3	3	3	3	3	9	18	27	3	3	3	3	3	3	3	3	3	9	18	27
1951	2021-12-29	First Year	female	12	＜6h/d	High school and blow	High school and blow	1.22727	3	1	2	2	1	2	2	1.85714	1	1	1	2	1	1	1	1.14286	1.40909	3	3	3	3	2	1	4	4	4	12	15	27	2	2	2	3	3	3	3	3	3	9	15	24
1952	2021-12-29	First Year	female	12	＜6h/d	Undergraduate	High school and blow	1.45455	3	1	1	2	1	3	1	1.71429	1	2	1	1	2	3	4	2	1.72294	1	1	1	3	3	2	2	2	3	7	11	18	1	1	1	1	2	2	2	4	3	9	8	17
1953	2021-12-29	First Year	male	13	6-8h/d	High school and blow	Specialties	1.22727	4	1	1	1	1	3	3	2	2	2	2	3	2	2	2	2.14286	1.79004	3	3	3	3	3	3	2	2	2	6	18	24	3	3	3	3	3	3	2	2	2	6	18	24
1954	2021-12-29	First Year	female	12	6-8h/d	Undergraduate	Undergraduate	1.63636	4	1	1	2	2	3	2	2.14286	1	1	1	1	2	2	2	1.42857	1.73593	3	3	3	3	3	2	3	3	3	9	17	26	3	3	3	3	3	2	3	3	3	9	17	26
1955	2021-12-29	First Year	male	12	8-10h/d	Undergraduate	Undergraduate	1.72727	3	3	2	1	1	1	2	1.85714	2	2	3	2	2	1	2	2	1.86147	1	3	4	4	4	4	1	1	2	4	20	24	2	4	4	4	4	4	1	1	4	6	22	28
1956	2021-12-29	First Year	female	13	6-8h/d	High school and blow	High school and blow	1.09091	4	1	1	1	1	1	2	1.57143	1	1	1	2	1	1	1	1.14286	1.2684	2	2	2	2	2	2	1	1	1	3	12	15	2	2	2	3	2	2	2	2	2	6	13	19
1957	2021-12-29	First Year	female	13	8-10h/d	Specialties	Specialties	1.22727	3	1	1	1	1	1	2	1.42857	2	2	2	2	2	3	3	2.28571	1.64719	3	3	3	3	3	2	3	3	3	9	17	26	3	3	3	3	3	2	3	3	3	9	17	26
1958	2021-12-29	First Year	female	13	6-8h/d	Specialties	Undergraduate	1.36364	4	1	1	2	1	3	2	2	1	1	1	1	1	3	3	1.57143	1.64502	2	3	4	3	2	2	4	3	2	9	16	25	3	3	3	2	2	2	3	3	2	8	15	23
1959	2021-12-29	First Year	female	12	8-10h/d	Undergraduate	Undergraduate	1.59091	4	1	2	2	2	5	3	2.71429	3	3	3	3	3	3	2	2.85714	2.38745	4	3	4	3	4	3	4	4	4	12	21	33	4	3	4	3	4	3	4	4	4	12	21	33
1960	2021-12-29	First Year	female	13	6-8h/d	Specialties	Undergraduate	1.77273	4	2	2	1	2	1	3	2.14286	2	1	2	2	4	4	4	2.71429	2.20996	3	3	3	3	3	3	2	2	2	6	18	24	3	3	3	3	3	3	2	2	2	6	18	24
1961	2021-12-29	First Year	female	12	6-8h/d	Undergraduate	Undergraduate	1.22727	3	1	1	1	1	2	1	1.42857	1	1	1	1	1	1	2	1.14286	1.26623	2	2	2	2	3	2	3	3	3	9	13	22	2	2	2	2	3	2	3	3	3	9	13	22
1962	2021-12-29	First Year	male	12	6-8h/d	High school and blow	Specialties	1.18182	3	1	1	2	2	2	3	2	2	2	2	2	2	3	3	2.28571	1.82251	3	3	3	2	3	3	2	2	2	6	17	23	3	3	3	2	3	3	2	2	2	6	17	23
1963	2021-12-29	First Year	female	13	6-8h/d	Undergraduate	Undergraduate	1.04545	5	2	1	1	1	4	2	2.28571	1	1	1	2	1	1	1	1.14286	1.49134	1	2	2	2	2	3	3	3	3	9	12	21	3	3	3	3	3	2	3	3	2	8	17	25
1964	2021-12-29	First Year	female	13	6-8h/d	Specialties	High school and blow	1	2	1	1	1	1	1	1	1.14286	1	1	1	1	1	1	1	1	1.04762	3	3	3	2	3	2	4	4	4	12	16	28	2	1	1	1	1	1	4	4	3	11	7	18
1965	2021-12-29	First Year	female	12	6-8h/d	Undergraduate	Undergraduate	1.18182	3	2	2	1	1	1	2	1.71429	1	1	3	1	1	1	1	1.28571	1.39394	4	4	4	4	4	4	1	1	1	3	24	27	4	4	4	4	4	4	1	1	1	3	24	27
1966	2021-12-29	First Year	male	13	6-8h/d	Undergraduate	Specialties	1.40909	5	5	3	3	3	3	4	3.71429	3	3	3	2	3	3	3	2.85714	2.66017	4	4	4	4	4	4	1	1	1	3	24	27	4	4	4	4	4	4	3	3	3	9	24	33
1967	2021-12-29	First Year	male	13	6-8h/d	Undergraduate	Specialties	1.63636	5	3	3	3	4	4	4	3.71429	2	2	3	3	4	4	4	3.14286	2.83117	4	4	4	4	4	4	4	4	2	10	24	34	3	3	3	4	3	2	4	4	4	12	18	30
1968	2021-12-29	First Year	male	13	＜6h/d	Specialties	Specialties	1.40909	5	2	2	1	1	1	3	2.14286	1	1	1	1	5	5	5	2.71429	2.08874	3	3	3	3	2	2	3	3	3	9	16	25	1	1	1	1	1	1	4	4	4	12	6	18
1969	2021-12-29	First Year	female	13	6-8h/d	High school and blow	Specialties	1.27273	3	1	2	1	3	2	2	2	2	2	2	2	3	2	2	2.14286	1.80519	3	3	3	3	3	2	3	3	3	9	17	26	3	3	3	3	3	2	3	3	3	9	17	26
1970	2021-12-29	First Year	male	13	6-8h/d	Undergraduate	Specialties	1.59091	4	3	3	2	1	2	3	2.57143	2	2	2	3	1	1	2	1.85714	2.00649	3	3	3	3	3	3	3	3	3	9	18	27	3	3	3	3	2	2	3	3	3	9	16	25
1971	2021-12-29	First Year	male	13	6-8h/d	Undergraduate	Specialties	1.59091	4	2	1	2	1	3	4	2.42857	2	2	2	2	2	3	3	2.28571	2.10173	3	3	3	3	3	3	3	3	3	9	18	27	3	3	3	3	3	3	3	3	3	9	18	27
1972	2021-12-29	First Year	male	12	＜6h/d	Undergraduate	Specialties	1.36364	5	2	2	1	1	1	1	1.85714	1	1	1	1	2	1	1	1.14286	1.45455	4	4	4	4	4	4	4	1	1	6	24	30	1	3	3	3	4	4	4	1	2	7	18	25
1973	2021-12-29	First Year	female	12	6-8h/d	Specialties	Undergraduate	1.40909	5	2	2	1	1	4	4	2.71429	2	2	2	2	2	2	2	2	2.04113	3	3	3	3	3	3	3	3	3	9	18	27	3	3	3	3	3	3	3	3	3	9	18	27
1974	2021-12-29	First Year	male	12	6-8h/d	Undergraduate	Undergraduate	2.81818	4	2	1	1	2	3	5	2.57143	3	2	3	2	5	5	5	3.57143	2.98701	3	3	3	3	4	3	1	2	3	6	19	25	3	3	3	3	3	3	2	2	2	6	18	24
1975	2021-12-29	First Year	male	12	6-8h/d	Undergraduate	Undergraduate	1.09091	3	1	1	1	1	1	2	1.42857	1	1	1	1	1	2	2	1.28571	1.2684	3	3	3	4	1	3	2	2	2	6	17	23	3	3	3	3	3	3	2	2	2	6	18	24
1976	2021-12-29	First Year	male	13	6-8h/d	Undergraduate	Undergraduate	1.68182	3	2	2	2	1	1	2	1.85714	3	3	3	3	4	4	2	3.14286	2.22727	3	3	3	3	3	3	3	3	3	9	18	27	3	3	3	3	2	3	3	3	3	9	17	26
1977	2021-12-29	First Year	female	12	6-8h/d	Undergraduate	Undergraduate	1.81818	4	2	1	3	3	4	3	2.85714	2	2	1	3	4	4	4	2.85714	2.51082	3	3	3	3	3	2	2	2	2	6	17	23	3	3	3	3	3	3	2	2	2	6	18	24
1978	2021-12-29	First Year	male	13	6-8h/d	Specialties	Undergraduate	1.54545	5	2	2	1	1	2	2	2.14286	1	1	1	1	3	1	1	1.28571	1.65801	4	2	4	1	3	3	4	4	4	12	17	29	2	4	4	2	1	4	4	4	4	12	17	29
1979	2021-12-29	First Year	male	13	6-8h/d	Undergraduate	Specialties	1.45455	3	2	1	2	1	4	2	2.14286	1	1	1	1	2	3	3	1.71429	1.77056	1	3	2	2	2	1	3	3	4	10	11	21	2	2	2	3	3	2	3	3	3	9	14	23
1980	2021-12-29	First Year	male	13	6-8h/d	Specialties	High school and blow	2.27273	5	1	1	3	5	5	4	3.42857	2	3	2	2	3	2	1	2.14286	2.61472	3	2	1	3	4	3	4	4	4	12	16	28	3	3	2	1	1	2	4	4	4	12	12	24
1981	2021-12-29	First Year	female	13	8-10h/d	High school and blow	High school and blow	2.18182	5	1	2	1	5	4	5	3.28571	4	4	4	4	4	2	2	3.42857	2.96537	1	1	1	1	1	1	3	3	3	9	6	15	1	1	1	1	1	1	3	3	3	9	6	15
1982	2021-12-29	First Year	male	12	8-10h/d	High school and blow	High school and blow	2.04545	5	3	4	2	5	5	4	4	5	4	3	5	5	4	4	4.28571	3.44372	3	1	1	1	3	3	4	4	4	12	12	24	4	4	4	4	4	4	4	4	4	12	24	36
1983	2021-12-29	First Year	male	13	6-8h/d	High school and blow	High school and blow	1.68182	4	2	3	5	3	3	2	3.14286	1	2	2	2	4	4	4	2.71429	2.51299	4	4	4	4	4	4	3	3	3	9	24	33	4	4	4	4	4	4	3	3	3	9	24	33
1984	2021-12-29	First Year	male	13	6-8h/d	High school and blow	High school and blow	3	5	1	1	1	1	5	1	2.14286	1	4	1	4	4	5	5	3.42857	2.85714	4	4	4	4	1	4	2	2	2	6	21	27	4	4	4	4	1	4	2	2	2	6	21	27
1985	2021-12-29	First Year	male	13	＜6h/d	Specialties	Specialties	1.86364	5	3	3	3	4	3	3	3.42857	1	1	1	1	1	4	4	1.85714	2.38312	4	4	4	4	4	4	3	3	3	9	24	33	4	4	4	4	4	4	3	3	3	9	24	33
1986	2021-12-29	First Year	male	12	6-8h/d	High school and blow	High school and blow	1.54545	5	2	2	1	1	3	2	2.28571	1	1	1	1	1	5	5	2.14286	1.99134	1	4	4	4	4	4	4	4	4	12	21	33	4	4	4	4	2	3	4	4	4	12	21	33
1987	2021-12-29	First Year	female	12	6-8h/d	Specialties	Specialties	1.54545	3	2	2	1	1	3	2	2	1	4	1	4	4	3	2	2.71429	2.08658	3	2	1	2	1	1	4	3	4	11	10	21	3	2	2	2	2	1	3	4	4	11	12	23
1988	2021-12-29	First Year	male	13	＜6h/d	High school and blow	High school and blow	2	5	5	4	5	5	5	5	4.85714	5	5	5	5	5	5	5	5	3.95238	3	3	3	1	4	3	2	2	2	6	17	23	3	4	3	1	4	3	2	2	2	6	18	24
1989	2021-12-29	First Year	male	13	＜6h/d	High school and blow	Specialties	2.27273	4	2	2	1	1	5	4	2.71429	4	3	4	5	3	4	5	4	2.99567	2	2	3	3	2	1	4	4	4	12	13	25	1	2	3	3	2	1	4	4	4	12	12	24
1990	2021-12-29	First Year	female	12	＜6h/d	High school and blow	High school and blow	1.45455	1	2	2	4	2	2	1	2	2	2	2	1	1	2	1	1.57143	1.67532	3	2	3	1	1	2	3	3	3	9	12	21	2	2	2	3	2	2	3	3	3	9	13	22
1991	2021-12-29	First Year	male	13	8-10h/d	High school and blow	High school and blow	1.59091	3	4	4	2	3	2	3	3	2	2	2	3	2	3	3	2.42857	2.33983	3	3	3	3	3	3	2	2	2	6	18	24	4	4	4	4	4	4	1	1	1	3	24	27
1992	2021-12-29	First Year	female	12	6-8h/d	High school and blow	High school and blow	1.31818	5	1	2	1	2	4	2	2.42857	2	2	2	2	2	2	1	1.85714	1.86797	3	3	3	3	3	3	2	2	2	6	18	24	3	3	3	3	3	3	2	2	2	6	18	24
1993	2021-12-29	First Year	female	13	＜6h/d	Specialties	High school and blow	1.40909	5	1	2	1	1	4	1	2.14286	1	3	1	3	3	1	1	1.85714	1.80303	3	3	3	3	3	3	2	2	2	6	18	24	3	3	3	3	3	3	1	1	1	3	18	21
1994	2021-12-29	First Year	male	13	6-8h/d	High school and blow	High school and blow	1.09091	5	2	4	2	1	2	3	2.71429	2	2	2	2	4	2	2	2.28571	2.0303	4	4	4	4	4	4	2	2	2	6	24	30	4	4	4	4	4	4	2	2	2	6	24	30
1995	2021-12-29	First Year	female	13	6-8h/d	High school and blow	High school and blow	1.54545	4	1	1	1	2	4	3	2.28571	1	3	2	3	3	1	1	2	1.94372	2	3	3	3	2	1	3	4	4	11	14	25	4	2	3	2	1	1	4	4	4	12	13	25
1996	2021-12-29	First Year	female	12	6-8h/d	High school and blow	High school and blow	1.54545	5	1	1	1	4	4	2	2.57143	2	2	3	1	3	4	4	2.71429	2.27706	2	2	2	2	3	2	4	4	4	12	13	25	3	3	3	3	3	2	4	4	4	12	17	29
1997	2021-12-29	First Year	male	13	6-8h/d	Specialties	High school and blow	1.59091	3	4	2	2	1	2	2	2.28571	4	3	3	3	4	4	4	3.57143	2.48268	3	3	3	3	3	3	4	4	4	12	18	30	4	3	3	3	3	3	4	4	4	12	19	31
1998	2021-12-29	First Year	female	13	6-8h/d	High school and blow	High school and blow	2.04545	5	1	1	2	2	5	4	2.85714	5	5	3	5	5	2	2	3.85714	2.91991	3	3	3	3	3	3	3	3	3	9	18	27	3	3	3	3	3	3	3	3	3	9	18	27
1999	2021-12-29	First Year	female	13	6-8h/d	High school and blow	High school and blow	1.40909	3	2	2	1	3	3	3	2.42857	1	2	1	2	2	3	2	1.85714	1.89827	2	3	3	3	2	2	3	3	3	9	15	24	3	3	3	3	2	3	3	3	3	9	17	26
[truncated: 475 more rows]
[truncated: 52 more columns]
